# Supplementary material for: Factors Associated With The Prevalence And Severity of Nausea While Undergoing Radiation Among Women Diagnosed With Early-Stage Breast Cancer
Source: Research Square preprint supplement (doi:10.21203/rs.3.rs-481513/v1), 2021-06-09
Supplement: Supplementary file 1 [file fa2414f3c77a5ea7c6999516.xlsx]

## Sheet: Sheet1
ID	AvgInt	Nausea	Age	Old_SurgType	SurgType	Side	Tx_Dummy	Tx_DummyNote	AvgPain	PainMeds	PainMedsYN	SmokeHx	PONV	Motion	FamilyHx	PINV	Eth	ER	PR	Neoadj	Hand
185	0	0	76	Segmental Mastectomy	0	Left	0		0	None	0	0	1	1	1	1	0			0	0
195	0	0	70	Segmental Mastectomy	0	Right	0		4	None	0	0	1	0	1	0	0			0
198	0	0	59	Segmental Mastectomy	0	Right	0		3	OTC	1	0	0	1	1	1	0	1	1	1
205	0	0	45	Segmental Mastectomy	0	Right	0		1.3	None	0	0	0	0	0	0	0	0	0	1	0
207	0	0	67	Segmental Mastectomy	0	Right	0		0	None	0	0	0	0	0	0	0	0	0	0
209	0	0	72	Mastectomy	1	Bilateral	0		8	None	0	0	0	0	1	1	0	0	0	1	0
211	0	0	56	Segmental Mastectomy	0	Left	0		3.3	None	0	0	0	0	1	1	0	1	1	1	0
213	0	0	66	Mastectomy	1	Bilateral	0		0	None	0	0	0	1	0	0	0	1	1	1	1
216	0	0	50	Segmental Mastectomy	0	Left	1	Herceptin	4	OTC	1	0	1	1	1	1	0	1	1	0	0
217	0	0	77	Segmental Mastectomy	0	Left	0		0	None	0	1	1	0	1	1	0	1	1	0	1
218	0	0	69	Segmental Mastectomy	0	Left	0		3.5	None	0	0	1	1	0	1	0	1	1	0
221	0	0	59	Segmental Mastectomy	0	Right	0		3	None	0	0	1	0	0	1	0	1	1	0	0
222	0	0	65	Segmental Mastectomy	0	Left	0		0	None	0	0	0	1	1	1	0	1	1	0	0
234	0	0	60	Segmental Mastectomy	0	Left	0		3	OTC	1	0	1	1	0	0	0	1	1	0	0
237	0	0	67	Segmental Mastectomy	0	Left	0		1	OTC	1	0	0	0	0	0	0	1	1	0
238	0	0	29	Mastectomy	1	Bilateral	1	AI	1	OTC	1	0	0	0	0	0	0	0	0	1	0
241	0	0	35	Mastectomy	1	Left	0		3.5	OTC	1	0	1	0	0	0	0	0		1
247	0	0	70	Segmental Mastectomy	0	Left	0		0	None	0	0	0	1	0	0	0	1	0	0	0
248	0	0	71	Segmental Mastectomy	0	Left	0		3	None	0	0	0	0	1	0	0	1	1	0	0
251	0	0	52	Segmental Mastectomy	0	Right	0		2	OTC	1	0	0	0	0	0	0	1	1	0	0
253	0	0	58	Segmental Mastectomy	0	Right	1	AI	6	Rx	1	1	0	0	0	0	0	0		0
255	0	0	67	Segmental Mastectomy	0	Left	0		0	None	0	0	0	0	0	0	0	1	1	0	0
259	0	0	67	Segmental Mastectomy	0	Left	0		0	None	0	0	1	0	0	0	0			1	0
260	0	0	75	Segmental Mastectomy	0	Right	0		2	None	0	0	0	0	0	0	0	1	1	0	0
265	0	0	71	Segmental Mastectomy	0	Bilateral	0		4	OTC	1	0	0	0	0	1	0	0	0	1	1
266	0	0	62	Segmental Mastectomy	0	Left	0		1	None	0	0	1	1	0	0	0	1	0	0	0
269	0	0	69	Segmental Mastectomy	0	Left	0		0	None	0	1	0	0	0	0	1	1	1	0	0
273	0	0	62	Mastectomy	1	Right	1	AI	5.7	None	0	0	0	1	0	0	0	1	0	1	0
275	0	0	44	Mastectomy	1	Right	1	Chemo, Herceptin, Perjeta	5	None	0	0	0	0	0	0	0	0	0	1	0
276	0	0	73	Segmental Mastectomy	0	Left	0		0	None	0	0	0	1	0	1	0	0	0	0	0
278	0	0	76	Segmental Mastectomy	0	Left	0		5	None	0	1	0	0	0	1	0	0	0	1	1
280	0	0	65	Mastectomy	1	Bilateral	1	Tamoxifen	2	OTC	1	0	0	0	0	1	0	0	1	1
281	0	0	52	Segmental Mastectomy	0	Right	0		0	None	0	2	0	0	0	1	0	1	1	0	0
282	0	0	68	Segmental Mastectomy	0	Left	0		0	None	0	1	0	0	0	0	0	0	0	0	0
284	0	0	73	Segmental Mastectomy	0	Right	0		5.5	OTC	1	0	1	1	1	1	0	1	1	0	0
285	0	0	71	Segmental Mastectomy	0	Right	1	Herceptin	0	None	0	2	1	0	0	0	0	1	1	0	0
286	0	0	63	Mastectomy	1	Left	0		5	None	0	0	0	0	0	0	0	0	0		0
287	0	0	54	Segmental Mastectomy	0	Left	1	Herceptin	0	None	0	0	0	0	0	0	0	0	0	0	1
291	0	0	55	Segmental Mastectomy	0	Left	1	Chemo & Herceptin	4	OTC	1	0	0	1	0	0	0	1	1	1	0
294	0	0	63	Segmental Mastectomy	0	Right	0		2.7	OTC	1	0	0	0	0	0	0	1	1	0	0
296	0	0	71	Segmental Mastectomy	0	Left	0		0	None	0	2	0	1	0	1	0	1	1	0	0
297	0	0	54	Mastectomy	1	Bilateral	0		3.5	Rx	1	0	0	0	1	0	0	1	1	0	0
300	0	0	69	Segmental Mastectomy	0	Right	0		0	None	0	0	0	0	0	0	1	1	0	0	0
302	0	0	42	Mastectomy	1	Left	1	Zoladex	3	OTC	1	2	0	0	0	0	1	1	0	1	0
305	0	0	73	Segmental Mastectomy	0	Left	0		3	OTC	1	0	0	0	0	1	0	0	0	0	0
306	0	0	72	Segmental Mastectomy	0	Right	0		0	None	0	2	0	0	0	0	0	1	1	0	0
309	0	0	73	Segmental Mastectomy	0	Right	0		7	Rx	1	2	0	0	1	0	1	1	1	0	0
311	0	0	55	Segmental Mastectomy	0	Right	0		1	None	0	0	0	0	0	0	1	1	1	0	0
317	0	0	54	Segmental Mastectomy	0	Left	0		1.8	OTC	1	0	1	1	0	0	0	1	1	0	0
322	0	0	64	Segmental Mastectomy	0	Right	0		0	None	0	2	0	0	0	0	0	1	1	0	1
324	0	0	30	Mastectomy	1	Bilateral	1	Zoladex	6	None	0	0	0	0	0	0	0	1	1	1	0
327	0	0	68	Segmental Mastectomy	0	Left	0		3	OTC	1	0	0	1	0	0	0	1	1	0	0
328	0	0	78	Segmental Mastectomy	0	Left	0		3	None	0	2	0	0	0	0	0	0	1	0	0
330	0	0	70	Segmental Mastectomy	0	Left	1	AI	1	OTC	1	0	0	0	0	0	0	1	1	0	0
333	0	0	58	Segmental Mastectomy	0	Right	0		2	None	0	0	0	1	0	1	0	0	1	0	0
336	0	0	69	Segmental Mastectomy	0	Left	0		0	None	0	2	1	0	0	0	0	1	1	0	1
337	0	0	78	Mastectomy	1	Right	0		0	None	0	0	1	0	0	0	1	1	1	0	0
343	0	0	52	Segmental Mastectomy	0	Left	0		5	OTC	1	2	0	0	0	0	0	1	1	0	0
345	0	0	49	Segmental Mastectomy	0	Right	0		3.2	OTC	1	0	0	0	1	1	0	1	1	0	0
351	0	0	65	Segmental Mastectomy	0	Right	0		0	None	0	0	0	0	0	0	0	1	1	0	1
352	0	0	43	Segmental Mastectomy	0	Right	0		3	OTC	1	2	1	1	1	1	1	1	1	0	0
354	0	0	74	Segmental Mastectomy	0	Bilateral	0		2.3	OTC	1	0	0	0	1	1	0	1	1	0	0
359	0	0	62	Segmental Mastectomy	0	Left	0		0	None	0	2	0	0	0	0	0	0	0	0	0
360	0	0	40	Segmental Mastectomy	0	Right	0		2.3	OTC	1	2	0	1	1	1	0	0	0	1	1
363	0	0	61	Segmental Mastectomy	0	Left	0		0	None	0	0	0	0	0	0	0	1	1	0	0
364	0	0	52	Segmental Mastectomy	0	Right	0		0	None	0	0	1	1	1	0	0	1	1	0	0
365	0	0	71	Mastectomy	1	Bilateral	0		0	None	0	0	0	0	1	0	0	1	1	0	0
369	0	0	51	Segmental Mastectomy	0	Left	0		1	None	0	0	0	1	0	0	1	0	0	0	0
374	0	0	70	Segmental Mastectomy	0	Left	0		0	None	0	2	0	1	0	1	0	1	1	0	0
377	0	0	40	Mastectomy	1	Left	0		6	OTC	1	0	0	0	0	0	0	1	1	0	0
378	0	0	64	Mastectomy	1	Right	0		1	OTC	1	0	0	0	0	0	1	1	1	0	0
379	0	0	56	Segmental Mastectomy	0	Right	0		0	None	0	0	0	0	0	0	0	1	1	0	1
380	0	0	48	Segmental Mastectomy	0	Left	0		1.3	None	0	0	0	1	0	1	0	1	1	0	0
386	0	0	47	Mastectomy	1	Left	0		0	None	0	0	0	0	0	1	0	1	1	0	0
387	0	0	73	Segmental Mastectomy	0	Right	0		1	OTC	1	0	0	0	0	0	0	1	1	0	0
389	0	0	74	Segmental Mastectomy	0	Left	0		0	None	0	2	0	0	0	0	0	1	1	0	1
390	0	0	64	Segmental Mastectomy	0	Left	0		8	None	0	0	0	1	0	0	0	1	1	1	0
393	0	0	67	Segmental Mastectomy	0	Left	0		0	None	0	0	0	0	0	0	0	1	1	0	1
396	0	0	72	Segmental Mastectomy	0	Left	0		2	OTC	1	0	0	0	0	0	1	1	1	0	0
397	0	0	63	Mastectomy	1	Bilateral	0		0	None	0	0	0	0	0	0	0	0	0	1	0
399	0	0	62	Mastectomy	1	Bilateral	1	Chemo & Herceptin	0	None	0	2	0	0	0	0	0	0	0	1	0
403	0	0	52	Segmental Mastectomy	0	Left	1	Herceptin and Perjeta	0	None	0	0	0	0	0	0	0	1	1	1	0
404	0	0	63	Segmental Mastectomy	0	Left	0		2	None	0	0	0	1	0	1	0	1	1	0	0
406	0	0	61	Segmental Mastectomy	0	Right	0		0	None	0	0	1	1	0	0	0	1	1	0	0
411	0	0	76	Segmental Mastectomy	0	Left	0		1.8	OTC	1	2	0	1	0	1	0	0	0	1	0
412	0	0	52	Segmental Mastectomy	0	Right	0		0	None	0	0	0	0	0	1	1	1	1	0	0
414	0	0	55	Segmental Mastectomy	0	Left	1	AI	0	None	0	0	1	0	0	1	0	1	1	0	0
415	0	0	70	Segmental Mastectomy	0	Right	0		2	None	0	0	0	0	0	0	0	1	1	0	0
416	0	0	79	Segmental Mastectomy	0	Right	0		0	None	0	2	0	0	0	0	0	1	1	0	0
419	0	0	72	Segmental Mastectomy	0	Right	0		2	OTC	1	2	0	0	1	0	0	1	1	0	0
423	0	0	72	Segmental Mastectomy	0	Right	0		2	OTC	1	1	0	0	0	1	0	0	0	0	0
424	0	0	41	Mastectomy	1	Bilateral	0		1.3	None	0	0	0	0	1	0	0	1	1	0	0
427	0	0	64	Segmental Mastectomy	0	Right	0		2.5	None	0	0	0	0	0	1	0			0	0
430	0	0	53	Segmental Mastectomy	0	Left	1	AI	2.5	OTC	1	0	0	0	0	1	0	1	1	0	0
438	0	0	72	Segmental Mastectomy	0	Right	0		0	None	0	0	0	0	0	1	0	1	1	0	0
439	0	0	61	Segmental Mastectomy	0	Right	0		7	OTC	1	0	1	1	1	0	0	1	1	0	0
443	0	0	74	Segmental Mastectomy	0	Left	0		1	OTC	1	0	0	1	0	0	0	1	1	0	0
444	0	0	61	Segmental Mastectomy	0	Right	0		0	None	0	0	0	0	0	0	1	1	1	1	0
445	0	0	76	Segmental Mastectomy	0	Left	0		2	None	0	0	1	0	0	0	0	1	1	0	0
446	0	0	74	Segmental Mastectomy	0	Left	0		3	None	0	0	0	1	0	0	1	1	0	0	0
447	0	0	77	Segmental Mastectomy	0	Left	1	AI	2.3	OTC	1	0	0	0	0	0	0	1	1	0	0
448	0	0	34	Mastectomy	1	Bilateral	1	Herceptin and Perjeta	0	None	0	0	0	1	0	1	1	0	1	1	0
449	0	0	70	Segmental Mastectomy	0	Right	0		1.3	OTC	1	0	0	1	0	0	0	1	0	0	1
452	0	0	61	Segmental Mastectomy	0	Right	0		2.3	OTC	1	0	0	1	0	0	0	1	1	1	0
456	0	0	80	Segmental Mastectomy	0	Right	0		0	None	0	0	0	1	0	0	0	1	1	0	0
459	0	0	82	Segmental Mastectomy	0	Right	0		5	None	0	0	0	0	0	0	0	1	1	0	0
460	0	0	86	Segmental Mastectomy	0	Left	0		2	None	0	0	0	0	0	1	0	1	1	0	0
465	0	0	65	Segmental Mastectomy	0	Right	0		0	None	0	0	1	1	0	0	0	0	0	0	1
172	5	1	71	Segmental Mastectomy	0	Right	0		3	OTC	1	0	1	0	0	0	0	1	1	0	0
194	6	1	62	Segmental Mastectomy	0	Right	0		0	None	0	0	1	1	1	0	0	1	1	0
202	2	1	48	Mastectomy	1	Right	0		6	OTC	1	1	0	0	1	0	0	1	1	0
204	3	1	52	Segmental Mastectomy	0	Bilateral	1	AI	6	None	0	0	0	0	0	0	0	1	1	0	0
210	3	1	61	Segmental Mastectomy	0	Left	0		5	Rx	1	0	0	0	0	1	0	1	1	0	0
219	3	1	58	Segmental Mastectomy	0	Left	0		3	OTC	1	1	0	1	1	1	0	1	1	0
220	4	1	75	Segmental Mastectomy	0	Right	1	AI	4	Rx	1	0	1	0	0	1	0	1	1	0
223	5	1	46	Segmental Mastectomy	0	Right	0		7.5	Rx	1	0	0	1	1	1	0	1	0	1
224	3.9	1	63	Segmental Mastectomy	0	Left	0		1.5	Rx	1	0	0	0	0	1	0	1	1	1
226	0.25	1	53	Segmental Mastectomy	0	Left	0		1.8	None	0	0	0	1	0	0	1	1	0	1	0
227	2	1	65	Segmental Mastectomy	0	Left	0		7.3	OTC	1	0	1	1	0	0	0	1	1	0	1
228	1.25	1	34	Mastectomy	1	Left	0		1.8	OTC	1	0	0	1	0	1	0	1	1	0	1
231	2.2	1	70	Mastectomy	1	Left	0		7.4	Rx	1	0	0	0	0	0	0	1	1	0	0
235	3.67	1	44	Mastectomy	1	Bilateral	0		2.7	OTC	1	0	0	1	0	1	0	1	0	0	0
239	5	1	43	Segmental Mastectomy	0	Right	0		2	OTC	1	0	0	1	0	1	0	1	1	0	0
244	9	1	71	Segmental Mastectomy	0	Right	0		6	OTC	1	0	1	0	1	1	0	1	1	0
245	5.67	1	50	Segmental Mastectomy	0	Left	0		4	OTC	1	0	1	0	0	0	0	1	1	0	0
250	3	1	70	Segmental Mastectomy	0	Left	0		0	None	0	0	0	0	0	0	0	0	0	0	1
256	1	1	60	Segmental Mastectomy	0	Left	0		0	None	0	0	1	0	0	1	0	1	1	0	1
258	4	1	56	Mastectomy	1	Bilateral	0		1	None	0	0	0	1	0	1	0	1	1	0	0
263	1	1	71	Segmental Mastectomy	0	Right	0		2.3	Rx	1	0	1	0	0	1	0	1	1	0	0
267	1	1	56	Segmental Mastectomy	0	Left	1	Chemo & Herceptin	5	OTC	1	0	0	1	1	1	0	0	0	0	0
270	3	1	44	Segmental Mastectomy	0	Left	1	Zoladex	4.5	OTC	1	0	0	0	0	0	0	1	1	1	0
271	3	1	57	Segmental Mastectomy	0	Right	0		2	OTC	1	0	1	0	1	0	0	1	1	0	0
274	3	1	67	Segmental Mastectomy	0	Left	0		0	None	0	2	0	1	0	1	0	0	0	0	0
279	1.5	1	37	Segmental Mastectomy	0	Left	0		0	None	0	0	1	0	0	0	1	1	0	0	0
290	2	1	75	Segmental Mastectomy	0	Right	1	Chemo, Herceptin, Perjeta	7	OTC	1	0	0	1	0	0	0	1	1	1	0
292	1	1	51	Mastectomy	1	Right	0		2	None	0	0	0	1	0	1	0	1	1	0	0
293	2	1	57	Segmental Mastectomy	0	Right	0		4.3	OTC	1	0	0	0	1	0	1	0	0	0	0
307	1.7	1	56	Mastectomy	1	Right	1	Chemo, Herceptin, Perjeta	2.2	OTC	1	2	0	1	0	1	0	0	0	1	0
313	10	1	64	Segmental Mastectomy	0	Left	0		10	OTC	1	2	1	0	1	0	0	1	1	0	1
316	5	1	46	Segmental Mastectomy	0	Right	0		2.3	None	0	1	1	0	1	0	0	1	1	0	0
320	5	1	44	Segmental Mastectomy	0	Left	0		8	OTC	1	1	0	0	1	0	0	1	1	0	0
321	1	1	45	Mastectomy	1	Right	0		2	OTC	1	0	0	1	0	1	0	1	1	0	0
325	1	1	53	Segmental Mastectomy	0	Left	0		2.5	OTC	1	0	0	1	1	0	0	0	0	1	0
331	5	1	71	Segmental Mastectomy	0	Left	0		5	None	0	2	1	1	1	1	0	1	1	0	0
332	1	1	60	Segmental Mastectomy	0	Right	1	Herceptin and Perjeta	3	None	0	2	0	0	0	0	0	0	0	1	0
334	3	1	78	Segmental Mastectomy	0	Right	0		4	Rx	1	2	0	1	0	0	0	1	1	0	0
335	4	1	69	Segmental Mastectomy	0	Right	0		4	OTC	1	0	1	1	1	1	0	0	1	0	0
338	8	1	50	Segmental Mastectomy	0	Right	0		6.5	None	0	0	0	1	1	1	1	0	0	0	0
339	4.6	1	59	Mastectomy	1	Left	1	Chemo, Targeted therapy	4	Rx	1	1	1	0	0	0	0	1	1	1	0
340	1	1	63	Mastectomy	1	Right	0		8	OTC	1	0	1	1	0	0	0	1	1	1	0
342	5	1	70	Segmental Mastectomy	0	Left	0		2.8	OTC	1	0	0	0	0	1	0	1	1	0	0
348	1	1	67	Segmental Mastectomy	0	Left	0		1.3	None	0	0	1	1	1	0	0	0	1	1	0
349	4.33	1	76	Segmental Mastectomy	0	Left	0		5.7	OTC	1	0	1	0	1	1	0	1	1	0	0
353	1	1	82	Segmental Mastectomy	0	Left	1	AI	7	None	0	0	0	0	1	0	0	1	1	0	0
356	5	1	46	Mastectomy	1	Bilateral	0		2	None	0	0	0	0	0	0	0	0	0	1	0
358	1.3	1	62	Segmental Mastectomy	0	Right	0		2.67	None	0	2	0	1	1	0	0	1	1	0	0
366	1.67	1	69	Segmental Mastectomy	0	Left	1	Chemo	8	OTC	1	2	1	0	0	1	0	1	1	1	0
370	4	1	61	Segmental Mastectomy	0	Left	0		3.7	None	0	0	0	1	0	0	1	1	1	0	0
371	3	1	50	Segmental Mastectomy	0	Left	1	Tamoxifen	3	None	0	0	1	1	1	1	0	1	1	0	0
375	2	1	58	Segmental Mastectomy	0	Left	0		1	None	0	0	0	1	0	1	0	1	1	0	0
384	3.67	1	52	Mastectomy	1	Right	0		3.3	OTC	1	0	0	0	1	0	0	1	1	0	0
391	3.3	1	62	Segmental Mastectomy	0	Right	1	AI	1.7	OTC	1	0	0	1	0	0	0	1	1	0	0
395	1.4	1	64	Mastectomy	1	Bilateral	1	AI & Herceptin	3.4	OTC	1	0	0	0	0	0	0	1	0	0	0
398	3.3	1	36	Segmental Mastectomy	0	Left	1	Clinical trial	1	OTC	1	0	0	1	0	0	0	0	0	1	0
401	2.5	1	78	Segmental Mastectomy	0	Left	0		1	OTC	1	2	1	0	0	0	0	0	0	0	0
402	2.33	1	66	Segmental Mastectomy	0	Left	0		1	None	0	0	1	1	0	1	0	1	1	0	0
405	2	1	57	Segmental Mastectomy	0	Left	0		10	Rx	1	0	1	1	1	1	0	1	0	1	0
409	1	1	67	Segmental Mastectomy	0	Right	0		0	None	0	0	0	1	0	0	0	0	0	0	1
410	2.8	1	55	Mastectomy	1	Left	1	Zoladex	6	None	0	0	0	0	0	0	0	1	1	0	0
413	3.5	1	61	Segmental Mastectomy	0	Left	0		4.8	OTC	1	2	0	0	0	1	0	1	0	1	0
417	6	1	54	Mastectomy	1	Bilateral	0		6	OTC	1	1	0	0	0	1	0	0	0	1	0
418	3.3	1	57	Segmental Mastectomy	0	Right	1	Physical Therapy	4.7	OTC	1	1	0	0	0	0	0	0	0	0	0
421	7.5	1	58	Segmental Mastectomy	0	Left	0		1.3	OTC	1	2	0	0	0	0	1	1	1	0	0
425	8	1	69	Segmental Mastectomy	0	Right	1	Chemo	8	OTC	1	0	0	0	0	0	0	1	1	1	0
428	1	1	63	Segmental Mastectomy	0	Left	1	AI	0	None	0	0	0	0	0	0	0	1	1	0	0
429	5.3	1	65	Segmental Mastectomy	0	Left	0		8	OTC	1	0	0	0	0	1	1	1	1	0	0
431	1.33	1	42	Mastectomy	1	Bilateral	1	Chemo & Tamoxifen	2.6	OTC	1	0	0	0	0	1	0	1	1	1	0
432	5	1	42	Segmental Mastectomy	0	Right	0		0	None	0	0	1	1	1	1	0	1	1	0	0
435	1.67	1	77	Segmental Mastectomy	0	Right	0		1	None	0	0	0	1	0	1	0	1	1	0	0
437	3.5	1	49	Segmental Mastectomy	0	Left	0		7.3	Rx	1	0	1	1	0	0	0	1	1	0	0
441	3	1	61	Segmental Mastectomy	0	Right	0		3	None	0	0	0	1	0	0	0			0
455	2	1	59	Mastectomy	1	Bilateral	0		8	None	0	0	0	0	1	0	0	1	1	0	0
457	4	1	55	Segmental Mastectomy	0	Right	1	Physical Therapy	4.6	Rx	1	0	0	0	0	1	1			0	0
	3.27253	3							Ctrl none	70
	2.03511								Ctrl OTC	35
			65						Ctrl RX	3
			59						Case none	28
									Case OTC	36
					87.037		89.3333		Case RX	11
					12.963		10.6667
										0.324074
					26.4706		28.7671
					73.5294		71.2329

## Sheet: Codebook
Variable	Label	Variable Type	Codes
AvgInt	Average Nausea Severity	Numeric	0-10 Numerical Rating Scale
Nausea	Yes/No Nausea	Dummy	0 = No nausea 1 = Nausea
Age	Age	Continuous
Old_SurgType	Type of breast surgery	Categorical	Segmental Mastectomy Mastectomy
SurgType	Type of breast surgery	Numeric	0 = Segmental Mastectomy 1 = Mastectomy
Side	Surgical Side	Categorical	Left Right Bilateral
Tx_Dummy	Breast cancer treatment concurrent with breast radiation	Dummy	0 = No concurrent treatment 1 = Concurrent treatment
Tx_DummyNote	Type of breast cancer treatment concurrent with radiation	Open ended
AvgPain	Average pain level	Continuous	0-10 Numerical Rating Scale
PainMeds	Type of medications, if any, taken to alleviate pain	Categorical	None OTC Rx
PainMedsYN	Did participant take medications to alleviate pain?	Dummy	0 = No 1 = Yes
SmokeHx	Is participant a current smoker?	Dummy	0 = No 1 = Yes
PONV	History of postoperative nausea and vomiting	Dummy	0 = No 1 = Yes
Motion	History of motion sickness	Dummy	0 = No 1 = Yes
FamilyHx	Family history of nausea and vomiting	Dummy	0 = No 1 = Yes
PINV	History of nausea with pregnancy	Dummy	0 = No 1 = Yes
Eth	Participant's race	Dummy	0 = White 1 = Nonwhite
ER	Estrogen receptor	Dummy	0 = Negative 1 = Positive
PR	Progesterone receptor	Dummy	0 = Negative 1 = Positive
Hand	Handedness	Dummy	0 = Right-handed 1 = Left-handed or ambidextrous

## Sheet: Merged W-MFW-M
ID	date	Radiation	Chemo	AI	Tamoxifen	Perjeta	Herceptin	Targeted	Other	Q48_9_TEXT	Pain	Medicine	Nausea
172	2018-05-24	1	#NULL!	#NULL!	#NULL!	#NULL!	#NULL!	#NULL!	#NULL!		3	ibuprofen, tylenol - one pill each twice a day	0
172	2018-05-30	1	#NULL!	#NULL!	#NULL!	#NULL!	#NULL!	#NULL!	#NULL!		3		0
172	2018-07-14	1	#NULL!	#NULL!	#NULL!	#NULL!	#NULL!	#NULL!	#NULL!		3		0
172	2018-07-14	1	#NULL!	#NULL!	#NULL!	#NULL!	#NULL!	#NULL!	#NULL!		3	aspirin - 1 or 2 tablets a day	2
172											3	OTC	0.5
185	2019-01-08	1	#NULL!	#NULL!	#NULL!	#NULL!	#NULL!	#NULL!	#NULL!		0		0
185	2019-01-14	1	#NULL!	#NULL!	#NULL!	#NULL!	#NULL!	#NULL!	#NULL!		0		0
185											0	None	0
194	2018-08-20	1	#NULL!	#NULL!	#NULL!	#NULL!	#NULL!	#NULL!	#NULL!		0		6
195	2018-07-28	1	#NULL!	#NULL!	#NULL!	#NULL!	#NULL!	#NULL!	#NULL!		4		0
198	2018-09-17	1	#NULL!	#NULL!	#NULL!	#NULL!	#NULL!	#NULL!	#NULL!		3	Ibuprofen	0
198	2018-09-25	1	#NULL!	#NULL!	#NULL!	#NULL!	#NULL!	#NULL!	#NULL!		3	Ibuprofen daily	0
198											3
202	2018-09-17	1	#NULL!	#NULL!	#NULL!	#NULL!	#NULL!	#NULL!	#NULL!		6	ibuprofen 2x/day	2
204	2018-10-17	1	#NULL!	1	#NULL!	#NULL!	#NULL!	#NULL!	#NULL!		5		3
204	2018-11-08	1	#NULL!	1	#NULL!	#NULL!	#NULL!	#NULL!	#NULL!		6		2
204	2018-11-12	1	#NULL!	1	#NULL!	#NULL!	#NULL!	#NULL!	#NULL!		7		3
204											6		2.66667
205	2018-09-17	1	#NULL!	#NULL!	#NULL!	#NULL!	#NULL!	#NULL!	#NULL!		1	Tylenol	0
205	2018-09-25	1	#NULL!	#NULL!	#NULL!	#NULL!	#NULL!	#NULL!	#NULL!		1	Tylenol 2 500mg tablets once a day	0
205	2018-10-08	1	#NULL!	#NULL!	#NULL!	#NULL!	#NULL!	#NULL!	#NULL!		2	Tylenol 500mg tablets	0
205											1.33333		0
207	2018-09-18	1	#NULL!	#NULL!	#NULL!	#NULL!	#NULL!	#NULL!	#NULL!		0		0
207	2018-09-25	1	#NULL!	#NULL!	#NULL!	#NULL!	#NULL!	#NULL!	#NULL!		0		0
207											0		0
209	2018-10-08	1	#NULL!	#NULL!	#NULL!	#NULL!	#NULL!	#NULL!	#NULL!		1		0
209	2018-10-15	1	#NULL!	#NULL!	#NULL!	#NULL!	#NULL!	#NULL!	#NULL!		1		0
209	2018-10-23	1	#NULL!	#NULL!	#NULL!	#NULL!	#NULL!	#NULL!	#NULL!		0		0
209	2018-11-05	1	#NULL!	#NULL!	#NULL!	#NULL!	#NULL!	#NULL!	#NULL!		1		0
209											0.75		0
210	2018-10-17	1	#NULL!	#NULL!	#NULL!	#NULL!	#NULL!	#NULL!	#NULL!		5	gabapentin 300mg; ibuprofen 100mg; arthritis tylenol 1250mg	3
211	2018-09-25	1	#NULL!	#NULL!	#NULL!	#NULL!	#NULL!	#NULL!	#NULL!		1		0
211	2018-10-10	1	#NULL!	#NULL!	#NULL!	#NULL!	#NULL!	#NULL!	#NULL!		3		0
211	2018-10-15	1	#NULL!	#NULL!	#NULL!	#NULL!	#NULL!	#NULL!	#NULL!		6		0
211	2018-10-23	1	#NULL!	#NULL!	#NULL!	#NULL!	#NULL!	#NULL!	#NULL!		3		0
211											3.25		0
213	2018-09-19	1	#NULL!	#NULL!	#NULL!	#NULL!	#NULL!	#NULL!	#NULL!		0		0
213	2018-09-26	1	#NULL!	#NULL!	#NULL!	#NULL!	#NULL!	#NULL!	#NULL!		0		0
213	2018-10-09	1	#NULL!	#NULL!	#NULL!	#NULL!	#NULL!	#NULL!	#NULL!		0		0
213	2018-10-15	1	#NULL!	#NULL!	#NULL!	#NULL!	#NULL!	#NULL!	#NULL!		0		0
213											0		0
216	2019-02-26	1	#NULL!	#NULL!	#NULL!	#NULL!	1	#NULL!	#NULL!		4	Advil, 2 tabs, once a day	0
216	2019-03-12	1	#NULL!	#NULL!	#NULL!	#NULL!	1	#NULL!	#NULL!		4	Advil 2 tabs, 3 times a week	0
216	2019-03-21	1	#NULL!	#NULL!	#NULL!	#NULL!	1	#NULL!	#NULL!		4	Advil, 200mg once a day	0
216											4		0
217	2018-11-12	1	#NULL!	#NULL!	#NULL!	#NULL!	#NULL!	#NULL!	#NULL!		0		0
217	2018-11-29	1	#NULL!	#NULL!	#NULL!	#NULL!	#NULL!	#NULL!	#NULL!		0		0
217	2018-12-14	1	#NULL!	#NULL!	#NULL!	#NULL!	#NULL!	#NULL!	#NULL!		0		0
217	2018-12-19	1	#NULL!	#NULL!	#NULL!	#NULL!	#NULL!	#NULL!	#NULL!		0		0
217	2018-12-03	1	#NULL!	#NULL!	#NULL!	#NULL!	#NULL!	#NULL!	#NULL!		0		0
217											0		0
218	2018-10-09	1	#NULL!	#NULL!	#NULL!	#NULL!	#NULL!	#NULL!	#NULL!		0		0
218	2018-10-17	1	#NULL!	#NULL!	#NULL!	#NULL!	#NULL!	#NULL!	#NULL!		7		0
218											3.5		0
219	2019-01-18	1	#NULL!	#NULL!	#NULL!	#NULL!	#NULL!	#NULL!	#NULL!		2	ibuprofen and tylenol	3
219	2019-01-22	1	#NULL!	#NULL!	#NULL!	#NULL!	#NULL!	#NULL!	#NULL!		4	Tylenol and ibuprofen 2xs a day	3
219											3		3
220	2018-11-12	1	#NULL!	1	#NULL!	#NULL!	#NULL!	#NULL!	#NULL!		4	one hour before radiation treatment - Lortab	0
220	2018-11-20	1	#NULL!	1	#NULL!	#NULL!	#NULL!	#NULL!	#NULL!		4	8xs Norco 7.5/325 before rx appt	0
220	2018-11-28	1	#NULL!	1	#NULL!	#NULL!	#NULL!	#NULL!	#NULL!		4	hydrocodone	2
220	2018-12-11	1	#NULL!	#NULL!	#NULL!	#NULL!	#NULL!	#NULL!	#NULL!		6		0
220	2018-12-03	1	#NULL!	1	#NULL!	#NULL!	#NULL!	#NULL!	#NULL!		4	Hydrocodone once daily	0
220											4		0.4
221	2018-10-15	1	#NULL!	#NULL!	#NULL!	#NULL!	#NULL!	#NULL!	#NULL!		0		0
221	2018-10-23	1	#NULL!	#NULL!	#NULL!	#NULL!	#NULL!	#NULL!	#NULL!		0		0
221	2018-11-07	1	#NULL!	#NULL!	#NULL!	#NULL!	#NULL!	#NULL!	#NULL!		1		0
221											0.333333		0
222	2018-10-08	1	#NULL!	#NULL!	#NULL!	#NULL!	#NULL!	#NULL!	#NULL!		0		0
222	2018-10-15	1	#NULL!	#NULL!	#NULL!	#NULL!	#NULL!	#NULL!	#NULL!		0		0
222	2018-10-26	1	#NULL!	#NULL!	#NULL!	#NULL!	#NULL!	#NULL!	#NULL!		0		0
222											0		0
223	2018-10-25	1	#NULL!	#NULL!	#NULL!	#NULL!	#NULL!	#NULL!	#NULL!		7	ibuprofen or 5 mg oxy	5
223	2018-11-05	1	#NULL!	#NULL!	#NULL!	#NULL!	#NULL!	#NULL!	#NULL!		8		5
223											7.5		5
224	2018-11-15	1	#NULL!	#NULL!	#NULL!	#NULL!	#NULL!	#NULL!	#NULL!		3	motrin 2x/day	4
224	2018-11-20	1	#NULL!	#NULL!	#NULL!	#NULL!	#NULL!	#NULL!	#NULL!		2	migraine medicne maxol 10	6
224	2018-11-26	1	#NULL!	#NULL!	#NULL!	#NULL!	#NULL!	#NULL!	#NULL!		3		6
224	2018-12-03	1	#NULL!	#NULL!	#NULL!	#NULL!	#NULL!	#NULL!	#NULL!		0		7
224											1.5		3.875
226	#NULL!	1	#NULL!	#NULL!	#NULL!	#NULL!	#NULL!	#NULL!	#NULL!		2		0
226	#NULL!	1	#NULL!	#NULL!	#NULL!	#NULL!	#NULL!	#NULL!	#NULL!		2		0
226	#NULL!	1	#NULL!	#NULL!	#NULL!	#NULL!	#NULL!	#NULL!	#NULL!		1	Warm patch	1
226	2018-12-04	1	#NULL!	#NULL!	#NULL!	#NULL!	#NULL!	#NULL!	#NULL!		2		0
226											1.75		0.25
227	2019-01-26	1	#NULL!	#NULL!	#NULL!	#NULL!	#NULL!	#NULL!	#NULL!		7	Tylenol and naproxen	1
227	2019-01-30	1	#NULL!	#NULL!	#NULL!	#NULL!	#NULL!	#NULL!	#NULL!		7	Tylenol and naproxen	3
227	2019-02-11	1	#NULL!	#NULL!	#NULL!	#NULL!	#NULL!	#NULL!	#NULL!		8	Naproxen and tylenol	2
227											7.33333		2
228	#NULL!	1	#NULL!	#NULL!	#NULL!	#NULL!	#NULL!	#NULL!	#NULL!		1		1
228	2019-06-12	1	#NULL!	#NULL!	#NULL!	#NULL!	#NULL!	#NULL!	#NULL!		3	Burn cream, Motrin as needed	0
228	2019-04-29	1	#NULL!	#NULL!	#NULL!	#NULL!	#NULL!	#NULL!	#NULL!		1		2
228	2019-06-03	1	#NULL!	#NULL!	#NULL!	#NULL!	#NULL!	#NULL!	#NULL!		2		2
228											1.75		1.25
231	2019-06-14	1	#NULL!	#NULL!	#NULL!	#NULL!	#NULL!	#NULL!	#NULL!		5	Tylenol 500 mg or Ibuprofen 400 mg once or twice a day	0
231	2019-06-21	1	#NULL!	#NULL!	#NULL!	#NULL!	#NULL!	#NULL!	#NULL!		6	Ibuprofen 400 mg once	4
231	2019-05-29	1	#NULL!	#NULL!	#NULL!	#NULL!	#NULL!	#NULL!	#NULL!		7	aleve 2x/day	2
231	2019-06-05	1	#NULL!	#NULL!	#NULL!	#NULL!	#NULL!	#NULL!	#NULL!		9	A couple of 500 mg Aleve tablets	0
231	2019-07-09	1	#NULL!	#NULL!	#NULL!	#NULL!	#NULL!	#NULL!	#NULL!		10	2 5mgoxycodone q6h	5
231											7.4	Rx	2.2
234	2018-11-12	1	#NULL!	#NULL!	#NULL!	#NULL!	#NULL!	#NULL!	#NULL!		3	Ibuprofen 800 mg bid and CBD OIL	0
234	2018-12-03	1	#NULL!	#NULL!	#NULL!	#NULL!	#NULL!	#NULL!	#NULL!		3		0
234											3		0
235	2018-11-26	1	#NULL!	#NULL!	#NULL!	#NULL!	#NULL!	#NULL!	#NULL!		4	Ibuprofen occasionally--400 to 600 mg each time	0
235	2019-06-17	1	#NULL!	#NULL!	#NULL!	#NULL!	#NULL!	#NULL!	#NULL!		5	Ibuprofen 400-600 mg once or twice a day to relieve my headache	3
235	2019-06-24	1	#NULL!	#NULL!	#NULL!	#NULL!	#NULL!	#NULL!	#NULL!		0		2
235	2019-07-15	1	#NULL!	#NULL!	#NULL!	#NULL!	#NULL!	#NULL!	#NULL!		3	ibuprofen 1-2x	9
235	2019-07-01	1	#NULL!	#NULL!	#NULL!	#NULL!	#NULL!	#NULL!	#NULL!		0		6
235	2019-08-05	1	#NULL!	#NULL!	#NULL!	#NULL!	#NULL!	#NULL!	#NULL!		4	Tylenol and ibuprofen 2x's a day	2
235											2.66667		3.66667
237	2018-12-07	1	#NULL!	#NULL!	#NULL!	#NULL!	#NULL!	#NULL!	#NULL!		1	CBD oil under the tongue twice a day, Tylenol 1000 mg twice a day	0
238	2018-11-19	1	#NULL!	#NULL!	#NULL!	#NULL!	#NULL!	#NULL!	#NULL!		0		0
238	2018-11-26	1	#NULL!	#NULL!	#NULL!	#NULL!	#NULL!	#NULL!	#NULL!		0		0
238	2018-12-10	1	#NULL!	#NULL!	#NULL!	#NULL!	#NULL!	#NULL!	#NULL!		0		0
238	2018-12-17	1	#NULL!	#NULL!	#NULL!	#NULL!	#NULL!	#NULL!	#NULL!		1		0
238	2019-01-07	1	#NULL!	1	#NULL!	#NULL!	#NULL!	#NULL!	#NULL!		5	Two Aleeve in the morning and at night	0
238	2018-12-03	1	#NULL!	#NULL!	#NULL!	#NULL!	#NULL!	#NULL!	#NULL!		0		0
238											1		0
239	2018-11-26	1	#NULL!	#NULL!	#NULL!	#NULL!	#NULL!	#NULL!	#NULL!		0		0
239	2018-12-10	1	#NULL!	#NULL!	#NULL!	#NULL!	#NULL!	#NULL!	#NULL!		3	Ibuprofen as needed (400mg every 4-6 hours, but not continuously)	1
239	2018-12-18	1	#NULL!	#NULL!	#NULL!	#NULL!	#NULL!	#NULL!	#NULL!		3	Ibuprofen; 400 mg as needed (once or twice per day)	1
239	2018-12-03	1	#NULL!	#NULL!	#NULL!	#NULL!	#NULL!	#NULL!	#NULL!		2	Ibuprofen; 400 mg every 4-6 hours--not every day though	0
239											2		0.5
241	2019-01-18	1	#NULL!	#NULL!	#NULL!	#NULL!	#NULL!	#NULL!	#NULL!		3		0
241	2019-01-22	1	#NULL!	#NULL!	#NULL!	#NULL!	#NULL!	#NULL!	#NULL!		4	"just applied a topical cream for the discomfort caused by radiation"	0
241	2019-02-04	1	#NULL!	#NULL!	#NULL!	#NULL!	#NULL!	#NULL!	#NULL!		#NULL!		#NULL!
241											3.5		0
244	2019-01-25	1	#NULL!	#NULL!	#NULL!	#NULL!	#NULL!	#NULL!	#NULL!		6	Ibuprofen 400 mg twice a week	9
245	2018-12-12	1	#NULL!	#NULL!	#NULL!	#NULL!	#NULL!	#NULL!	#NULL!		5	alleve, ibuprofen	5
245	2018-12-17	1	#NULL!	#NULL!	#NULL!	#NULL!	#NULL!	#NULL!	#NULL!		2	alleve - once or twice	4
245	2018-12-07	1	#NULL!	#NULL!	#NULL!	#NULL!	#NULL!	#NULL!	#NULL!		5		8
245											4		5.66667
247	2018-12-12	1	#NULL!	#NULL!	#NULL!	#NULL!	#NULL!	#NULL!	#NULL!		0		0
247	2018-12-03	1	#NULL!	#NULL!	#NULL!	#NULL!	#NULL!	#NULL!	#NULL!		0		0
247											0		0
248	2018-12-17	1	#NULL!	#NULL!	#NULL!	#NULL!	#NULL!	#NULL!	#NULL!		1		0
248	2019-01-08	1	#NULL!	#NULL!	#NULL!	#NULL!	#NULL!	#NULL!	#NULL!		5		0
248	2019-01-14	1	#NULL!	#NULL!	#NULL!	#NULL!	#NULL!	#NULL!	#NULL!		3		0
248											3		0
250	2019-01-23	1	#NULL!	#NULL!	#NULL!	#NULL!	#NULL!	#NULL!	#NULL!		0		0
250	2019-01-30	1	#NULL!	#NULL!	#NULL!	#NULL!	#NULL!	#NULL!	#NULL!		0		0
250	2019-02-12	1	#NULL!	#NULL!	#NULL!	#NULL!	#NULL!	#NULL!	#NULL!		0		1
250											0		0.333333
251	2018-11-19	1	#NULL!	#NULL!	#NULL!	#NULL!	#NULL!	#NULL!	#NULL!		3	Tylenol, ibuprofen, Aleve daily	0
251	2018-12-14	1	#NULL!	#NULL!	#NULL!	#NULL!	#NULL!	#NULL!	#NULL!		1		0
251	2018-12-17	1	#NULL!	#NULL!	#NULL!	#NULL!	#NULL!	#NULL!	#NULL!		2		0
251	2019-01-11	1	#NULL!	#NULL!	#NULL!	#NULL!	#NULL!	#NULL!	#NULL!		2		0
251											2		0
253	2018-11-26	1	#NULL!	#NULL!	#NULL!	#NULL!	#NULL!	#NULL!	#NULL!		7	Oxycodone 15 mg four times a day	0
253	2019-01-22	1	#NULL!	1	#NULL!	#NULL!	#NULL!	#NULL!	#NULL!		5	ibuprofen 400 mg twice a day	0
253											6		0
255	2019-01-16	1	#NULL!	#NULL!	#NULL!	#NULL!	#NULL!	#NULL!	#NULL!		0		0
255	2019-01-22	1	#NULL!	#NULL!	#NULL!	#NULL!	#NULL!	#NULL!	#NULL!		0		0
255	2019-01-29	1	#NULL!	#NULL!	#NULL!	#NULL!	#NULL!	#NULL!	#NULL!		0		0
255	2019-02-12	1	#NULL!	#NULL!	#NULL!	#NULL!	#NULL!	#NULL!	#NULL!		0		0
255											0		0
256	2018-12-14	1	#NULL!	#NULL!	#NULL!	#NULL!	#NULL!	#NULL!	#NULL!		0		0
256	2019-01-16	1	#NULL!	#NULL!	#NULL!	#NULL!	#NULL!	#NULL!	#NULL!		0		0
256	2019-01-22	1	#NULL!	#NULL!	#NULL!	#NULL!	#NULL!	#NULL!	#NULL!		0		0
256	2019-02-01	1	#NULL!	#NULL!	#NULL!	#NULL!	#NULL!	#NULL!	#NULL!		0		4
256											0		1
258	2019-10-11	1	#NULL!	#NULL!	#NULL!	#NULL!	#NULL!	#NULL!	#NULL!		1		4
259	2019-02-19	1	#NULL!	#NULL!	#NULL!	#NULL!	#NULL!	#NULL!	#NULL!		0		0
259	2019-02-15	1	#NULL!	#NULL!	#NULL!	#NULL!	#NULL!	#NULL!	#NULL!		0		0
259											0		0
260	2019-01-18	1	#NULL!	#NULL!	#NULL!	#NULL!	#NULL!	#NULL!	#NULL!		0		0
260	2019-02-01	1	#NULL!	#NULL!	#NULL!	#NULL!	#NULL!	#NULL!	#NULL!		0		0
260	2019-02-19	1	#NULL!	#NULL!	#NULL!	#NULL!	#NULL!	#NULL!	#NULL!		6		0
260											2		0
263	2019-02-01	1	#NULL!	#NULL!	#NULL!	#NULL!	#NULL!	#NULL!	#NULL!		2	4 Vicodin in one day to help with post-procedural discomfort	2
263	2019-02-13	1	#NULL!	#NULL!	#NULL!	#NULL!	#NULL!	#NULL!	#NULL!		2		1
263	2019-02-22	1	#NULL!	#NULL!	#NULL!	#NULL!	#NULL!	#NULL!	#NULL!		2	1 Vicodin the day of the cystoscopy and the 1 the day after only	0
263	2019-02-26	1	#NULL!	#NULL!	#NULL!	#NULL!	#NULL!	#NULL!	#NULL!		3		1
263											2.25		1
265	2019-02-01	1	#NULL!	#NULL!	#NULL!	#NULL!	#NULL!	#NULL!	#NULL!		3	Tylenol arthritis strength 3 times a day (1300 mg)	0
265	2019-02-15	1	#NULL!	#NULL!	#NULL!	#NULL!	#NULL!	#NULL!	#NULL!		#NULL!		#NULL!
265	2019-02-19	1	#NULL!	#NULL!	#NULL!	#NULL!	#NULL!	#NULL!	#NULL!		5	takes Tylenol 1300 mg three times a day regardless of her pain level for chronic arthritic pain	0
265											4		0
266	2019-03-20	1	#NULL!	#NULL!	#NULL!	#NULL!	#NULL!	#NULL!	#NULL!		1		0
266	2019-03-25	1	#NULL!	#NULL!	#NULL!	#NULL!	#NULL!	#NULL!	#NULL!		1		0
266											1		0
267	2019-04-09	1	1	#NULL!	#NULL!	#NULL!	1	#NULL!	#NULL!		0		3
267	2019-04-18	1	1	#NULL!	#NULL!	#NULL!	1	#NULL!	#NULL!		0		0
267	2019-04-23	1	1	#NULL!	#NULL!	#NULL!	1	#NULL!	#NULL!		2	tylenol	1
267	2019-04-02	1	1	#NULL!	#NULL!	#NULL!	1	#NULL!	#NULL!		0		0
267											0.5		1
269	2019-02-19	1	#NULL!	#NULL!	#NULL!	#NULL!	#NULL!	#NULL!	#NULL!		0		0
269	2019-02-26	1	#NULL!	#NULL!	#NULL!	#NULL!	#NULL!	#NULL!	#NULL!		0		0
269											0		0
270	2019-03-11	1	#NULL!	#NULL!	#NULL!	#NULL!	#NULL!	#NULL!	1	Zolodex	5	Tylenol once a day not much	3
270	2019-03-28	1	#NULL!	#NULL!	#NULL!	#NULL!	#NULL!	#NULL!	1	Zolodex	4	Tylenol- as needed which has been 2 500 mg in morning or before bed	3
270	2019-03-07	1	#NULL!	1	#NULL!	#NULL!	#NULL!	#NULL!	#NULL!		4	2 tylenol or 1 advil 1x / day	3
270	2019-04-12	1	#NULL!	#NULL!	#NULL!	#NULL!	#NULL!	#NULL!	1	Zolodex	5	Tylenol 2 before bef	3
270											4.5		3
271	2019-02-22	1	#NULL!	#NULL!	#NULL!	#NULL!	#NULL!	#NULL!	#NULL!		2		6
271	2019-03-01	1	#NULL!	#NULL!	#NULL!	#NULL!	#NULL!	#NULL!	#NULL!		2	Tylenol 1000 mg once	0
271											2		3
273	2019-02-27	1	#NULL!	#NULL!	#NULL!	#NULL!	#NULL!	#NULL!	1		6		0
273	2019-04-15	1	#NULL!	1	#NULL!	#NULL!	1	#NULL!	#NULL!		5		0
273	2019-03-07	1	#NULL!	#NULL!	#NULL!	#NULL!	#NULL!	#NULL!	#NULL!		6		0
273											5.66667		0
274	2019-02-14	1	#NULL!	#NULL!	#NULL!	#NULL!	#NULL!	#NULL!	#NULL!		0		0
274	#NULL!	1	#NULL!	#NULL!	#NULL!	#NULL!	#NULL!	#NULL!	#NULL!		0		1
274	2019-03-03	1	#NULL!	#NULL!	#NULL!	#NULL!	#NULL!	#NULL!	#NULL!		0		0
274											0		0.333333
275	2019-03-21	1	1	#NULL!	#NULL!	#NULL!	#NULL!	#NULL!	#NULL!		1		0
275	2019-03-20	1	1	#NULL!	#NULL!	#NULL!	#NULL!	#NULL!	#NULL!		1		0
275	2019-03-25	1	1	#NULL!	#NULL!	#NULL!	#NULL!	#NULL!	#NULL!		0		0
275	2019-04-02	1	#NULL!	#NULL!	#NULL!	1	1	#NULL!	#NULL!		0		0
275											0.5		0
276	2019-02-27	1	#NULL!	#NULL!	#NULL!	#NULL!	#NULL!	#NULL!	#NULL!		0		0
278	2019-02-19	1	#NULL!	#NULL!	#NULL!	#NULL!	#NULL!	#NULL!	#NULL!		1		0
278	2019-02-26	1	#NULL!	#NULL!	#NULL!	#NULL!	#NULL!	#NULL!	#NULL!		0		0
278											0.5		0
279	2019-02-26	1	#NULL!	#NULL!	#NULL!	#NULL!	#NULL!	#NULL!	#NULL!		0		0
279	2019-03-12	1	#NULL!	#NULL!	#NULL!	#NULL!	#NULL!	#NULL!	#NULL!		0		2
279	2019-03-18	1	#NULL!	#NULL!	#NULL!	#NULL!	#NULL!	#NULL!	#NULL!		0		0
279	2019-03-06	1	#NULL!	#NULL!	#NULL!	#NULL!	#NULL!	#NULL!	#NULL!		0		4
279											0		1.5
280	2019-03-11	1	#NULL!	#NULL!	1	#NULL!	#NULL!	#NULL!	#NULL!		2	motrin as needed.	0
280	2019-03-28	1	#NULL!	#NULL!	#NULL!	#NULL!	#NULL!	#NULL!	#NULL!		2	tylenol prn	0
280											2		0
281	2019-03-18	1	#NULL!	#NULL!	#NULL!	#NULL!	#NULL!	#NULL!	#NULL!		0		0
281	2019-04-05	1	#NULL!	#NULL!	#NULL!	#NULL!	#NULL!	#NULL!	#NULL!		0		0
281											0		0
282	2019-06-13	1	#NULL!	#NULL!	#NULL!	#NULL!	#NULL!	#NULL!	#NULL!		0		0
282	2019-06-21	1	#NULL!	#NULL!	#NULL!	#NULL!	#NULL!	#NULL!	#NULL!		0		0
282	2019-06-24	1	#NULL!	#NULL!	#NULL!	#NULL!	#NULL!	#NULL!	#NULL!		0		0
282											0		0
284	2019-03-26	1	#NULL!	#NULL!	#NULL!	#NULL!	#NULL!	#NULL!	#NULL!		3	Advil 200mg 2 twice a day	0
284	2019-04-09	1	#NULL!	#NULL!	#NULL!	#NULL!	#NULL!	#NULL!	#NULL!		8	Advil 400 mg to 800 mg at night	0
284											5.5		0
285	2019-06-21	1	#NULL!	#NULL!	#NULL!	#NULL!	1	#NULL!	#NULL!		0		0
285	2019-06-26	1	#NULL!	#NULL!	#NULL!	#NULL!	1	#NULL!	#NULL!		0		0
285	2019-07-15	1	#NULL!	#NULL!	#NULL!	#NULL!	#NULL!	#NULL!	#NULL!		0		0
285											0		0
286	2019-04-05	1	#NULL!	#NULL!	#NULL!	#NULL!	#NULL!	#NULL!	#NULL!		5		0
287	2019-07-15	1	#NULL!	#NULL!	#NULL!	#NULL!	1	#NULL!	#NULL!		0		0
287	2019-08-12	1	#NULL!	#NULL!	#NULL!	#NULL!	1	#NULL!	#NULL!		0		0
287	2019-08-19	1	#NULL!	#NULL!	#NULL!	#NULL!	1	#NULL!	#NULL!		0		0
287	2019-07-29	1	#NULL!	#NULL!	#NULL!	#NULL!	1	#NULL!	#NULL!		0		0
287											0		0
290	2019-03-26	1	#NULL!	#NULL!	#NULL!	1	1	#NULL!	#NULL!		0		0
290	2019-04-19	1	#NULL!	#NULL!	#NULL!	1	1	#NULL!	#NULL!		0		6
290	2019-04-03	1	1	#NULL!	#NULL!	1	1	#NULL!	#NULL!		2	Tylenol 3 times (325mg pill)	0
290											0.666667		2
291	2019-04-02	1	1	#NULL!	#NULL!	#NULL!	1	#NULL!	#NULL!		4	Tylenol, prn, restarted Plaquenil for RA	0
292	2019-07-03	1	#NULL!	#NULL!	#NULL!	#NULL!	#NULL!	#NULL!	#NULL!		0		2
292	2019-08-01	1	#NULL!	#NULL!	#NULL!	#NULL!	#NULL!	#NULL!	#NULL!		4		0
292											2		1
293	2019-08-30	1	#NULL!	#NULL!	#NULL!	#NULL!	#NULL!	#NULL!	#NULL!		2	three Tylenol one night; Ibuprofen 400 mg maybe twice in the evening	0
293	2019-09-13	1	#NULL!	#NULL!	#NULL!	#NULL!	#NULL!	#NULL!	#NULL!		6	ibuprofen	6
293	2019-09-19	1	#NULL!	#NULL!	#NULL!	#NULL!	#NULL!	#NULL!	#NULL!		5		0
293											4.33333		2
294	#NULL!	1	#NULL!	#NULL!	#NULL!	#NULL!	#NULL!	#NULL!	#NULL!		3	Tylenol reg strength or ibuprofen 400 mg occasionally	0
294	2019-04-26	1	#NULL!	#NULL!	#NULL!	#NULL!	#NULL!	#NULL!	#NULL!		2	400 mg ibuprofen QD	0
294	2019-04-29	1	#NULL!	#NULL!	#NULL!	#NULL!	#NULL!	#NULL!	#NULL!		3	Tylenol 2 reg strength QD or Ibuprofen 400mg QD	0
294											2.66667		0
296	2019-04-24	1	#NULL!	#NULL!	#NULL!	#NULL!	#NULL!	#NULL!	#NULL!		0		0
296	2019-05-16	1	#NULL!	#NULL!	#NULL!	#NULL!	#NULL!	#NULL!	#NULL!		0		0
296	2019-05-06	1	#NULL!	#NULL!	#NULL!	#NULL!	#NULL!	#NULL!	#NULL!		0		0
296											0		0
297	2019-10-24	1	#NULL!	#NULL!	#NULL!	#NULL!	#NULL!	#NULL!	#NULL!		1	Tylenol every few days	0
297	2019-11-24	1	#NULL!	#NULL!	#NULL!	#NULL!	#NULL!	#NULL!	#NULL!		5	Tylenol every 6 hours	0
297	2019-12-04	1	#NULL!	#NULL!	#NULL!	#NULL!	#NULL!	#NULL!	#NULL!		8	Oxycodone 2 times a day	0
297	2019-11-07	1	#NULL!	#NULL!	#NULL!	#NULL!	#NULL!	#NULL!	#NULL!		0		0
297											3.5		0
300	2019-04-18	1	#NULL!	#NULL!	#NULL!	#NULL!	#NULL!	#NULL!	#NULL!		0		0
302	2019-05-13	1	#NULL!	#NULL!	#NULL!	#NULL!	#NULL!	#NULL!	1	monthly zolodex	2	Motrin 3x a week for headaches	0
302	2019-05-21	1	#NULL!	#NULL!	#NULL!	#NULL!	#NULL!	#NULL!	1	zoladex	2	Motrin, about 3 days a week	0
302	2019-05-06	1	#NULL!	#NULL!	#NULL!	#NULL!	#NULL!	#NULL!	1	Zoledex inj Tomorrow	5	motrin 400mg 1x's a day	0
302	2019-05-29	1	#NULL!	#NULL!	#NULL!	#NULL!	#NULL!	#NULL!	1	zoladex	3	ibuprofen prn 1-2x/dsay	0
302											3		0
305	2019-11-08	1	#NULL!	#NULL!	#NULL!	#NULL!	#NULL!	#NULL!	#NULL!		3	one Tylenol 500 mg	0
306	2019-06-20	1	#NULL!	#NULL!	#NULL!	#NULL!	#NULL!	#NULL!	#NULL!		0		0
307	2019-05-15	1	1	#NULL!	#NULL!	1	1	#NULL!	#NULL!		2		0
307	2019-05-23	1	1	#NULL!	#NULL!	1	1	#NULL!	#NULL!		2	Alieve, 1 tab, a few times	1
307	2019-06-13	1	1	#NULL!	#NULL!	1	1	#NULL!	#NULL!		2	Alieve pm	0
307	2019-06-18	1	1	#NULL!	#NULL!	1	1	#NULL!	#NULL!		3	Aleve	0
307	2019-06-25	1	1	#NULL!	#NULL!	1	1	#NULL!	#NULL!		1	Alieve	0
307	2019-06-02	1	1	#NULL!	#NULL!	1	1	#NULL!	#NULL!		3		0
307											2.16667		0.166667
309	2019-05-13	1	#NULL!	#NULL!	#NULL!	#NULL!	#NULL!	#NULL!	#NULL!		5	steriods for arthritis,	0
309	2019-05-06	1	#NULL!	#NULL!	#NULL!	#NULL!	#NULL!	#NULL!	#NULL!		9	Tylenol 1000 mg 4 per day	0
309											7		0
311	2019-06-18	1	#NULL!	#NULL!	#NULL!	#NULL!	#NULL!	#NULL!	#NULL!		1		0
313	2019-10-25	1	#NULL!	#NULL!	#NULL!	#NULL!	#NULL!	#NULL!	#NULL!		10		10
313	2019-11-13	1	#NULL!	#NULL!	#NULL!	#NULL!	#NULL!	#NULL!	#NULL!		10	Tylenol 1000 mg daily for the past week	10
313											10		10
316	2019-05-16	1	#NULL!	#NULL!	#NULL!	#NULL!	#NULL!	#NULL!	#NULL!		0		0
316	2019-05-21	1	#NULL!	#NULL!	#NULL!	#NULL!	#NULL!	#NULL!	#NULL!		1		0
316	2019-06-13	1	#NULL!	#NULL!	#NULL!	#NULL!	#NULL!	#NULL!	#NULL!		4		2
316	2019-05-29	1	#NULL!	#NULL!	#NULL!	#NULL!	#NULL!	#NULL!	#NULL!		4		0
316											2.25		0.5
317	2019-06-10	1	#NULL!	#NULL!	#NULL!	#NULL!	#NULL!	#NULL!	#NULL!		3	advil according to dosage on bottle 2 pills . Usually one to two times a day.	0
317	2019-06-17	1	#NULL!	#NULL!	#NULL!	#NULL!	#NULL!	#NULL!	#NULL!		2	advil. Usually 2 pills once or twice a day	0
317	2019-06-24	1	#NULL!	#NULL!	#NULL!	#NULL!	#NULL!	#NULL!	#NULL!		1	advil	0
317	2019-05-31	1	#NULL!	#NULL!	#NULL!	#NULL!	#NULL!	#NULL!	#NULL!		1		0
317											1.75		0
320	2019-06-13	1	#NULL!	#NULL!	#NULL!	#NULL!	#NULL!	#NULL!	#NULL!		2		0
320	2019-06-21	1	#NULL!	#NULL!	#NULL!	#NULL!	#NULL!	#NULL!	#NULL!		0		0
320	2019-06-24	1	#NULL!	#NULL!	#NULL!	#NULL!	#NULL!	#NULL!	#NULL!		1	ibuprofen prn	0
320	2019-06-03	1	#NULL!	#NULL!	#NULL!	#NULL!	#NULL!	#NULL!	#NULL!		0		2
320											0.75		0.5
321	2020-01-15	1	#NULL!	#NULL!	#NULL!	#NULL!	#NULL!	#NULL!	#NULL!		2		1
321	2020-01-08	1	#NULL!	#NULL!	#NULL!	#NULL!	#NULL!	#NULL!	#NULL!		2	Ibuprofen 600 mg twice, 400 mg once	1
321											2		1
322	2019-12-11	1	#NULL!	#NULL!	#NULL!	#NULL!	#NULL!	#NULL!	#NULL!		0		0
324	2019-06-13	1	#NULL!	#NULL!	#NULL!	#NULL!	#NULL!	#NULL!	1	lupron	0		0
324	2019-06-23	1	#NULL!	#NULL!	#NULL!	#NULL!	#NULL!	#NULL!	1	zoladex	0		0
324	2019-06-24	1	#NULL!	#NULL!	#NULL!	#NULL!	#NULL!	#NULL!	1	zoladex	0		0
324	2019-07-16	1	#NULL!	#NULL!	#NULL!	#NULL!	#NULL!	#NULL!	1	zoladex	3		0
324	2019-07-01	1	#NULL!	#NULL!	#NULL!	#NULL!	#NULL!	#NULL!	1	zoladex	0		0
324											0.6		0
325	2019-07-15	1	#NULL!	#NULL!	#NULL!	#NULL!	#NULL!	#NULL!	#NULL!		3	ibuprofen 200 two or three times a week	1
325	2020-07-01	1	#NULL!	#NULL!	#NULL!	#NULL!	#NULL!	#NULL!	#NULL!		2		1
325											2.5		1
327	2019-06-18	1	#NULL!	#NULL!	#NULL!	#NULL!	#NULL!	#NULL!	#NULL!		0		0
327	2019-06-21	1	#NULL!	#NULL!	#NULL!	#NULL!	#NULL!	#NULL!	#NULL!		0		0
327	2019-06-24	1	#NULL!	#NULL!	#NULL!	#NULL!	#NULL!	#NULL!	#NULL!		1	advil 1x	0
327	2019-07-05	1	#NULL!	#NULL!	#NULL!	#NULL!	#NULL!	#NULL!	#NULL!		0		0
327											0.25		0
328	2019-08-12	1	#NULL!	#NULL!	#NULL!	#NULL!	#NULL!	#NULL!	#NULL!		0		0
328	2019-07-16	1	#NULL!	#NULL!	#NULL!	#NULL!	#NULL!	#NULL!	#NULL!		0		0
328	2019-08-02	1	#NULL!	#NULL!	#NULL!	#NULL!	#NULL!	#NULL!	#NULL!		1		0
328											0.333333		0
330	2019-07-15	1	#NULL!	1	#NULL!	#NULL!	#NULL!	#NULL!	#NULL!		1	Aleve. One day for long-standing intermittent knee pain	0
330	2019-07-29	1	#NULL!	1	#NULL!	#NULL!	#NULL!	#NULL!	#NULL!		1		0
330											1		0
331	2019-07-19	1	#NULL!	#NULL!	#NULL!	#NULL!	#NULL!	#NULL!	#NULL!		5		5
332	2019-06-20	1	#NULL!	#NULL!	#NULL!	1	1	#NULL!	#NULL!		0		1
332	2019-07-20	1	#NULL!	#NULL!	#NULL!	1	1	#NULL!	#NULL!		0		1
332	2019-07-08	1	#NULL!	#NULL!	#NULL!	1	1	#NULL!	#NULL!		1		1
332											0.333333		1
333	2019-11-01	1	#NULL!	#NULL!	#NULL!	#NULL!	#NULL!	#NULL!	#NULL!		2		0
334	2019-08-13	1	#NULL!	#NULL!	#NULL!	#NULL!	#NULL!	#NULL!	#NULL!		7	Norco 5mg on Friday when she went shopping	0
334	2019-08-20	1	#NULL!	#NULL!	#NULL!	#NULL!	#NULL!	#NULL!	#NULL!		0		0
334	2019-08-26	1	#NULL!	#NULL!	#NULL!	#NULL!	#NULL!	#NULL!	#NULL!		5	Norco 1 every so often	1
334											4		0.333333
335	2019-08-12	1	#NULL!	#NULL!	#NULL!	#NULL!	#NULL!	#NULL!	#NULL!		4	Tylenol for arthritis	0
336	2019-08-23	1	#NULL!	#NULL!	#NULL!	#NULL!	#NULL!	#NULL!	#NULL!		0		0
336	2019-08-26	1	#NULL!	#NULL!	#NULL!	#NULL!	#NULL!	#NULL!	#NULL!		0		0
336	2019-08-01	1	#NULL!	#NULL!	#NULL!	#NULL!	#NULL!	#NULL!	#NULL!		0		0
336											0		0
337	2019-08-12	1	#NULL!	#NULL!	#NULL!	#NULL!	#NULL!	#NULL!	#NULL!		0		0
338	2019-08-12	1	#NULL!	#NULL!	#NULL!	#NULL!	#NULL!	#NULL!	#NULL!		7		10
338	2019-08-21	1	#NULL!	#NULL!	#NULL!	#NULL!	#NULL!	#NULL!	#NULL!		6		7
338	2019-08-26	1	#NULL!	#NULL!	#NULL!	#NULL!	#NULL!	#NULL!	#NULL!		8		8
338	2019-09-04	1	#NULL!	#NULL!	#NULL!	#NULL!	#NULL!	#NULL!	1	Last one today	5		7
338											6.5		8
339	2019-07-22	1	#NULL!	#NULL!	#NULL!	#NULL!	#NULL!	#NULL!	#NULL!		0		0
339	2019-09-24	1	1	#NULL!	#NULL!	#NULL!	#NULL!	#NULL!	#NULL!		6	ibuprofen before bed	8
339	2019-09-30	1	1	#NULL!	#NULL!	#NULL!	#NULL!	#NULL!	#NULL!		7	1-oxycodon 5 mg mostly Taken b4 bed	8
339	2019-10-03	1	1	#NULL!	#NULL!	#NULL!	#NULL!	#NULL!	#NULL!		7	1-5mg oxycodon, every evening	7
339	2019-08-02	1	#NULL!	#NULL!	#NULL!	#NULL!	#NULL!	1	#NULL!		0		0
339											4		4.6
340	2019-09-09	1	#NULL!	#NULL!	#NULL!	#NULL!	#NULL!	#NULL!	#NULL!		8	tylenol 500mg and motrin 200mg each 2x/day	1
342	2019-08-12	1	#NULL!	#NULL!	#NULL!	#NULL!	#NULL!	#NULL!	#NULL!		1		0
342	2019-08-20	1	#NULL!	#NULL!	#NULL!	#NULL!	#NULL!	#NULL!	#NULL!		3		0
342	2019-08-26	1	#NULL!	#NULL!	#NULL!	#NULL!	#NULL!	#NULL!	#NULL!		2		1
342	2019-09-04	1	#NULL!	#NULL!	#NULL!	#NULL!	#NULL!	#NULL!	#NULL!		5	Azithromycin, Mucinex, Tylenol	1
342											2.75		0.5
343	2019-08-12	1	#NULL!	#NULL!	#NULL!	#NULL!	#NULL!	#NULL!	#NULL!		1	Tylenol/3 caplets in am on August 9-12	0
343	2019-07-30	1	#NULL!	#NULL!	#NULL!	#NULL!	#NULL!	#NULL!	#NULL!		0		0
343											0.5		0
345	2019-08-22	1	#NULL!	#NULL!	#NULL!	#NULL!	#NULL!	#NULL!	#NULL!		0		0
345	2019-08-27	1	#NULL!	#NULL!	#NULL!	#NULL!	#NULL!	#NULL!	#NULL!		6	pain pill does not know for sore throat	0
345	2019-09-09	1	#NULL!	#NULL!	#NULL!	#NULL!	#NULL!	#NULL!	#NULL!		4	naproxen 600 mg prn	0
345	2019-09-04	1	#NULL!	#NULL!	#NULL!	#NULL!	#NULL!	#NULL!	#NULL!		6	Aleve or Ibuprofen 600 mg before radiation and 4 hours later	0
345	2019-08-09	1	#NULL!	#NULL!	#NULL!	#NULL!	#NULL!	#NULL!	#NULL!		0		0
345											3.2		0
348	2019-08-12	1	#NULL!	#NULL!	#NULL!	#NULL!	#NULL!	#NULL!	#NULL!		0		0
348	2019-09-25	1	#NULL!	#NULL!	#NULL!	#NULL!	#NULL!	#NULL!	#NULL!		0		0
348	2019-10-22	1	#NULL!	#NULL!	#NULL!	#NULL!	#NULL!	#NULL!	#NULL!		4		3
348											1.33333		1
349	2019-07-24	1	#NULL!	#NULL!	#NULL!	#NULL!	#NULL!	#NULL!	#NULL!		4		3
349	2019-08-12	1	#NULL!	#NULL!	#NULL!	#NULL!	#NULL!	#NULL!	#NULL!		7	ibuprofen	4
349	2019-08-02	1	#NULL!	#NULL!	#NULL!	#NULL!	#NULL!	#NULL!	#NULL!		6	Ibuprofen 600 mg every 6 hours as needed, sometimes Tylenol 1000 mg instead	6
349											5.66667		4.33333
351	2019-08-12	1	#NULL!	#NULL!	#NULL!	#NULL!	#NULL!	#NULL!	#NULL!		0		0
351	2019-08-20	1	#NULL!	#NULL!	#NULL!	#NULL!	#NULL!	#NULL!	#NULL!		0		0
351	2019-08-26	1	#NULL!	#NULL!	#NULL!	#NULL!	#NULL!	#NULL!	#NULL!		0		0
351											0		0
352	2019-11-11	1	#NULL!	#NULL!	#NULL!	#NULL!	#NULL!	#NULL!	#NULL!		3	naproxen prn	0
353	2019-09-03	1	#NULL!	1	#NULL!	#NULL!	#NULL!	#NULL!	#NULL!		7		1
354	2019-09-10	1	#NULL!	#NULL!	#NULL!	#NULL!	#NULL!	#NULL!	#NULL!		3	aleve	0
354	2019-09-27	1	#NULL!	#NULL!	#NULL!	#NULL!	#NULL!	#NULL!	#NULL!		2	"I take Tylenol and Aleve when I need it"	0
354	2019-09-17	1	#NULL!	#NULL!	#NULL!	#NULL!	#NULL!	#NULL!	#NULL!		2	Aleve twice a day	0
354											2.33333		0
356	2019-08-21	1	#NULL!	#NULL!	#NULL!	#NULL!	#NULL!	#NULL!	#NULL!		0		1
356	2019-09-11	1	#NULL!	#NULL!	#NULL!	#NULL!	#NULL!	#NULL!	#NULL!		4		0
356											2		0.5
358	2019-10-01	1	#NULL!	#NULL!	#NULL!	#NULL!	#NULL!	#NULL!	#NULL!		0		4
358	2019-10-17	1	#NULL!	#NULL!	#NULL!	#NULL!	#NULL!	#NULL!	#NULL!		4		4
358	2019-09-24	1	#NULL!	#NULL!	#NULL!	#NULL!	#NULL!	#NULL!	#NULL!		0		0
358											1.33333		2.66667
359	2020-02-28	1	#NULL!	#NULL!	#NULL!	#NULL!	#NULL!	#NULL!	#NULL!		0		0
359	2020-03-11	1	#NULL!	#NULL!	#NULL!	#NULL!	#NULL!	#NULL!	#NULL!		0		0
359	2020-03-19	1	#NULL!	#NULL!	#NULL!	#NULL!	#NULL!	#NULL!	#NULL!		0		0
359	2020-03-24	1	#NULL!	#NULL!	#NULL!	#NULL!	#NULL!	#NULL!	#NULL!		0		0
359	2020-03-04	1	#NULL!	#NULL!	#NULL!	#NULL!	#NULL!	#NULL!	#NULL!		0		0
359	2020-04-01	1	#NULL!	#NULL!	#NULL!	#NULL!	#NULL!	#NULL!	#NULL!		0		0
359											0		0
360	2019-10-07	1	#NULL!	#NULL!	#NULL!	#NULL!	#NULL!	#NULL!	#NULL!		2		0
360	2019-10-15	1	#NULL!	#NULL!	#NULL!	#NULL!	#NULL!	#NULL!	#NULL!		3		0
360	2019-10-23	1	#NULL!	#NULL!	#NULL!	#NULL!	#NULL!	#NULL!	#NULL!		3		0
360	2019-11-06	1	#NULL!	#NULL!	#NULL!	#NULL!	#NULL!	#NULL!	#NULL!		3	400mg Ibuprofen one time	0
360	2019-11-14	1	#NULL!	#NULL!	#NULL!	#NULL!	#NULL!	#NULL!	#NULL!		3		0
360	2019-10-28	1	#NULL!	#NULL!	#NULL!	#NULL!	#NULL!	#NULL!	#NULL!		3		0
360											2.83333		0
363	2019-09-11	1	#NULL!	#NULL!	#NULL!	#NULL!	#NULL!	#NULL!	#NULL!		0		0
363	2019-09-17	1	#NULL!	#NULL!	#NULL!	#NULL!	#NULL!	#NULL!	#NULL!		0		0
363	2019-09-04	1	#NULL!	#NULL!	#NULL!	#NULL!	#NULL!	#NULL!	#NULL!		0		0
363											0		0
364	2019-09-17	1	#NULL!	#NULL!	#NULL!	#NULL!	#NULL!	#NULL!	#NULL!		0		0
364	2019-09-27	1	#NULL!	#NULL!	#NULL!	#NULL!	#NULL!	#NULL!	#NULL!		0		0
364	2019-10-09	1	#NULL!	#NULL!	#NULL!	#NULL!	#NULL!	#NULL!	#NULL!		0		0
364	2019-09-30	1	#NULL!	#NULL!	#NULL!	#NULL!	#NULL!	#NULL!	#NULL!		0		0
364											0		0
365	2020-02-19	1	#NULL!	#NULL!	#NULL!	#NULL!	#NULL!	#NULL!	#NULL!		0		0
365	2020-03-02	1	#NULL!	#NULL!	#NULL!	#NULL!	#NULL!	#NULL!	#NULL!		0		0
365											0		0
366	2019-09-19	1	#NULL!	#NULL!	#NULL!	#NULL!	#NULL!	1	#NULL!		8	ibuprofen	0
366	2019-09-24	1	1	#NULL!	#NULL!	#NULL!	#NULL!	#NULL!	#NULL!		8	Ibuprofen otc 800 mg 3x a day	2
366	2019-09-04	1	1	#NULL!	#NULL!	#NULL!	#NULL!	#NULL!	#NULL!		8	Ibuprofen 800mg 3x's a day	3
366											8		1.66667
369	2020-03-16	1	#NULL!	#NULL!	#NULL!	#NULL!	#NULL!	#NULL!	#NULL!		0		0
369	2020-04-06	1	#NULL!	#NULL!	#NULL!	#NULL!	#NULL!	#NULL!	#NULL!		0		0
369	2020-03-30	1	#NULL!	#NULL!	#NULL!	#NULL!	#NULL!	#NULL!	#NULL!		3		0
369											1		0
370	2019-10-08	1	#NULL!	#NULL!	#NULL!	#NULL!	#NULL!	#NULL!	#NULL!		3		0
370	2019-10-15	1	#NULL!	#NULL!	#NULL!	#NULL!	#NULL!	#NULL!	#NULL!		4		3
370	2019-10-29	1	#NULL!	#NULL!	#NULL!	#NULL!	#NULL!	#NULL!	#NULL!		4		9
370											3.66667		4
371	2019-10-07	1	#NULL!	#NULL!	1	#NULL!	#NULL!	#NULL!	#NULL!		3	CBD rollon	3
374	2019-11-06	1	#NULL!	#NULL!	#NULL!	#NULL!	#NULL!	#NULL!	#NULL!		0		0
374	2019-11-14	1	#NULL!	#NULL!	#NULL!	#NULL!	#NULL!	#NULL!	#NULL!		0		0
374	2019-10-29	1	#NULL!	#NULL!	#NULL!	#NULL!	#NULL!	#NULL!	#NULL!		0		0
374											0		0
375	2020-01-07	1	#NULL!	#NULL!	#NULL!	#NULL!	#NULL!	#NULL!	#NULL!		1		2
377	2020-05-12	1	#NULL!	#NULL!	#NULL!	#NULL!	#NULL!	#NULL!	#NULL!		6	Ibuprofen. Dailey	0
377	2020-05-21	1	#NULL!	#NULL!	#NULL!	#NULL!	#NULL!	#NULL!	#NULL!		6	Ibuprofen and Tylenol	0
377	2020-05-26	1	#NULL!	#NULL!	#NULL!	#NULL!	#NULL!	#NULL!	#NULL!		6	Tylenol, Ibuprofen	0
377	2020-06-10	1	#NULL!	#NULL!	#NULL!	#NULL!	#NULL!	#NULL!	#NULL!		6	Ibuprofen,Tylenol,	0
377	2020-05-06	1	#NULL!	#NULL!	#NULL!	#NULL!	#NULL!	#NULL!	#NULL!		6	Ibuprofen Dailey	0
377	2020-06-02	1	#NULL!	#NULL!	#NULL!	#NULL!	#NULL!	#NULL!	#NULL!		6	Ibuprofen and Tylenol	0
377											6		0
378	2019-12-09	1	#NULL!	#NULL!	#NULL!	#NULL!	#NULL!	#NULL!	#NULL!		1	Tylenol / 500mg. as needed	0
378	2020-01-09	1	#NULL!	#NULL!	#NULL!	#NULL!	#NULL!	#NULL!	#NULL!		1	Tylenol 500mg. as needed	0
378											1		0
379	2019-11-20	1	#NULL!	#NULL!	#NULL!	#NULL!	#NULL!	#NULL!	#NULL!		0		0
379	2019-11-14	1	#NULL!	#NULL!	#NULL!	#NULL!	#NULL!	#NULL!	#NULL!		0		0
379											0		0
380	2020-07-20	1	#NULL!	#NULL!	#NULL!	#NULL!	#NULL!	#NULL!	#NULL!		1		0
380	2020-07-27	1	#NULL!	#NULL!	#NULL!	#NULL!	#NULL!	#NULL!	#NULL!		2		0
380	2020-08-10	1	#NULL!	#NULL!	#NULL!	#NULL!	#NULL!	#NULL!	#NULL!		1		0
380	2020-08-02	1	#NULL!	#NULL!	#NULL!	#NULL!	#NULL!	#NULL!	#NULL!		1		0
380											1.25		0
384	2020-01-15	1	#NULL!	#NULL!	#NULL!	#NULL!	#NULL!	#NULL!	#NULL!		2	ibuprofen	1
384	2020-01-24	1	#NULL!	#NULL!	#NULL!	#NULL!	#NULL!	#NULL!	#NULL!		2	Ibuprofen 600mg in evenings	4
384	2020-01-10	1	#NULL!	#NULL!	#NULL!	#NULL!	#NULL!	#NULL!	#NULL!		6	2-3x 200mg ibuprofen daily	6
384											3.33333		3.66667
386	2020-01-21	1	#NULL!	#NULL!	#NULL!	#NULL!	#NULL!	#NULL!	#NULL!		0		0
386	2020-01-28	1	#NULL!	#NULL!	#NULL!	#NULL!	#NULL!	#NULL!	#NULL!		0		0
386	2020-01-08	1	#NULL!	#NULL!	#NULL!	#NULL!	#NULL!	#NULL!	#NULL!		0		0
386											0		0
387	2019-11-14	1	#NULL!	#NULL!	#NULL!	#NULL!	#NULL!	#NULL!	#NULL!		1	200mg Advil 1 every couple of days	0
389	2019-12-04	1	#NULL!	#NULL!	#NULL!	#NULL!	#NULL!	#NULL!	#NULL!		0		0
390	2020-01-24	1	#NULL!	#NULL!	#NULL!	#NULL!	#NULL!	#NULL!	#NULL!		0		0
390	2020-01-28	1	#NULL!	#NULL!	#NULL!	#NULL!	#NULL!	#NULL!	#NULL!		1		0
390	2019-12-24	1	#NULL!	#NULL!	#NULL!	#NULL!	#NULL!	#NULL!	#NULL!		1		0
390	2020-01-08	1	#NULL!	#NULL!	#NULL!	#NULL!	#NULL!	#NULL!	#NULL!		1		0
390											0.75		0
391	2020-01-21	1	#NULL!	1	#NULL!	#NULL!	#NULL!	#NULL!	#NULL!		1	Extra strength Tylenol recommended damage 2 caplets	0
391	2020-01-30	1	#NULL!	1	#NULL!	#NULL!	#NULL!	#NULL!	#NULL!		1	It’s joint pain and only twice in the last week I took Tylenol	1
391	2020-02-10	1	#NULL!	1	#NULL!	#NULL!	#NULL!	#NULL!	#NULL!		3	Extra Strength Tylonal 2 capsules	0
391											1.66667		0.333333
393	2020-01-24	1	#NULL!	#NULL!	#NULL!	#NULL!	#NULL!	#NULL!	#NULL!		0		0
393	2020-01-31	1	#NULL!	#NULL!	#NULL!	#NULL!	#NULL!	#NULL!	#NULL!		0		0
393	2020-02-06	1	#NULL!	#NULL!	#NULL!	#NULL!	#NULL!	#NULL!	#NULL!		0		0
393	2020-02-17	1	#NULL!	#NULL!	#NULL!	#NULL!	#NULL!	#NULL!	#NULL!		0		0
393	2020-02-18	1	#NULL!	#NULL!	#NULL!	#NULL!	#NULL!	#NULL!	#NULL!		0		0
393											0		0
395	2020-05-11	1	#NULL!	#NULL!	#NULL!	#NULL!	1	#NULL!	#NULL!		4	Tylenol 500 mg 1 x a day	1
395	2020-05-19	1	#NULL!	1	#NULL!	#NULL!	1	#NULL!	#NULL!		3	Tylenol 1 x day 500mg	1
395	2020-06-08	1	#NULL!	1	#NULL!	#NULL!	1	#NULL!	#NULL!		3	Tylenol 500 mg 2x day	2
395	2020-05-08	1	#NULL!	#NULL!	#NULL!	#NULL!	1	#NULL!	#NULL!		4	Tylenol	2
395	2020-06-01	1	#NULL!	#NULL!	#NULL!	#NULL!	1	#NULL!	#NULL!		3	Tylenol 500 mg	1
395											3.4		1.4
396	2020-01-21	1	#NULL!	#NULL!	#NULL!	#NULL!	#NULL!	#NULL!	#NULL!		2	tylenol	0
397	2020-01-15	1	#NULL!	#NULL!	#NULL!	#NULL!	#NULL!	#NULL!	#NULL!		0		0
397	2020-01-21	1	#NULL!	#NULL!	#NULL!	#NULL!	#NULL!	#NULL!	#NULL!		0		0
397	2020-01-29	1	#NULL!	#NULL!	#NULL!	#NULL!	#NULL!	#NULL!	#NULL!		0		0
397	2020-02-17	1	#NULL!	#NULL!	#NULL!	#NULL!	#NULL!	#NULL!	#NULL!		0		0
397	2020-02-07	1	#NULL!	#NULL!	#NULL!	#NULL!	#NULL!	#NULL!	#NULL!		0		0
397											0		0
398	2020-02-24	1	#NULL!	#NULL!	#NULL!	#NULL!	#NULL!	#NULL!	1		1	Ibuprofen, a couple of doses	0
398	2020-01-30	1	#NULL!	#NULL!	#NULL!	#NULL!	#NULL!	#NULL!	1	clinical trail etzlomab	2	tylenol 650mg, once dialy	1
398	2020-02-11	1	#NULL!	#NULL!	#NULL!	#NULL!	#NULL!	#NULL!	1		0		0
398											1		0.333333
399	2020-02-13	1	1	#NULL!	#NULL!	#NULL!	1	#NULL!	1	kadcyla	0		0
399	2020-02-21	1	1	#NULL!	#NULL!	#NULL!	#NULL!	#NULL!	1		0		0
399	2020-01-09	1	1	#NULL!	#NULL!	#NULL!	#NULL!	#NULL!	#NULL!		0		0
399	2020-02-07	1	#NULL!	#NULL!	#NULL!	#NULL!	#NULL!	#NULL!	1	kadyla	0		0
399											0		0
401	2020-02-10	1	#NULL!	#NULL!	#NULL!	#NULL!	#NULL!	#NULL!	#NULL!		1	Aleve AM & PM	0
401	2020-02-18	1	#NULL!	#NULL!	#NULL!	#NULL!	#NULL!	#NULL!	#NULL!		1	ALEVE AM - ADVIL PM	0
401	2020-02-04	1	#NULL!	#NULL!	#NULL!	#NULL!	#NULL!	#NULL!	#NULL!		1	ALEVE AM & PM	1
401	2020-02-14	1	#NULL!	#NULL!	#NULL!	#NULL!	#NULL!	#NULL!	#NULL!		1	ALEVE AM & PM	0
401											1		0.25
402	2020-01-17	1	#NULL!	#NULL!	#NULL!	#NULL!	#NULL!	#NULL!	#NULL!		3		2
402	2020-01-24	1	#NULL!	#NULL!	#NULL!	#NULL!	#NULL!	#NULL!	#NULL!		0		2
402	2020-01-10	1	#NULL!	#NULL!	#NULL!	#NULL!	#NULL!	#NULL!	#NULL!		0		3
402											1		2.33333
403	2020-01-21	1	#NULL!	#NULL!	#NULL!	#NULL!	#NULL!	#NULL!	#NULL!		0		0
403	2020-01-28	1	#NULL!	#NULL!	#NULL!	#NULL!	#NULL!	#NULL!	#NULL!		0		0
403	2020-02-06	1	#NULL!	#NULL!	#NULL!	1	1	#NULL!	#NULL!		0		0
403											0		0
404	2020-01-30	1	#NULL!	#NULL!	#NULL!	#NULL!	#NULL!	#NULL!	#NULL!		2		0
404	2020-01-24	1	#NULL!	#NULL!	#NULL!	#NULL!	#NULL!	#NULL!	#NULL!		2		0
404											2		0
405	2020-02-25	1	#NULL!	#NULL!	#NULL!	#NULL!	#NULL!	#NULL!	#NULL!		10	Tylenol and Gabapentin 3-4x over the week	2
406	2020-02-07	1	#NULL!	#NULL!	#NULL!	#NULL!	#NULL!	#NULL!	#NULL!		0		0
406	2020-02-13	1	#NULL!	#NULL!	#NULL!	#NULL!	#NULL!	#NULL!	#NULL!		0		0
406	2020-02-20	1	#NULL!	#NULL!	#NULL!	#NULL!	#NULL!	#NULL!	#NULL!		0		0
406	2020-02-20	1	#NULL!	#NULL!	#NULL!	#NULL!	#NULL!	#NULL!	#NULL!		0		0
406	2020-03-02	1	#NULL!	#NULL!	#NULL!	#NULL!	#NULL!	#NULL!	#NULL!		0		0
406											0		0
409	2020-03-30	1	#NULL!	#NULL!	#NULL!	#NULL!	#NULL!	#NULL!	#NULL!		0		2
409	2020-03-10	1	#NULL!	#NULL!	#NULL!	#NULL!	#NULL!	#NULL!	#NULL!		0		0
409											0		1
410	2020-03-10	1	#NULL!	#NULL!	#NULL!	#NULL!	#NULL!	#NULL!	#NULL!		0		0
410	2020-03-16	1	#NULL!	#NULL!	#NULL!	#NULL!	#NULL!	#NULL!	#NULL!		0		0
410	2020-03-23	1	#NULL!	#NULL!	#NULL!	#NULL!	#NULL!	#NULL!	#NULL!		0		0
410	2020-04-07	1	#NULL!	#NULL!	#NULL!	#NULL!	#NULL!	#NULL!	1	Zolodex	2		0
410	2020-04-13	1	#NULL!	#NULL!	#NULL!	#NULL!	#NULL!	#NULL!	1	Zolodex	0		0
410	2020-03-03	1	#NULL!	#NULL!	#NULL!	#NULL!	#NULL!	#NULL!	#NULL!		0		0
410	2020-03-31	1	#NULL!	#NULL!	#NULL!	#NULL!	#NULL!	#NULL!	1	Zolodex	2	Radiation oncologist prescribed Silverdene cream. I put it on a few times a day.	2
410											0.571429		0.285714
411	2020-02-10	1	#NULL!	#NULL!	#NULL!	#NULL!	#NULL!	#NULL!	#NULL!		0		0
411	2020-02-17	1	#NULL!	#NULL!	#NULL!	#NULL!	#NULL!	#NULL!	#NULL!		0		0
411	2020-02-26	1	#NULL!	#NULL!	#NULL!	#NULL!	#NULL!	#NULL!	#NULL!		0		0
411	2020-03-18	1	#NULL!	#NULL!	#NULL!	#NULL!	#NULL!	#NULL!	#NULL!		8	Silvadene for the blisters and Tylenol twice daily (two tabs)	0
411	2020-03-26	1	#NULL!	#NULL!	#NULL!	#NULL!	#NULL!	#NULL!	#NULL!		3		0
411	2020-03-05	1	#NULL!	#NULL!	#NULL!	#NULL!	#NULL!	#NULL!	#NULL!		0		0
411											1.83333		0
412	2020-06-16	1	#NULL!	#NULL!	#NULL!	#NULL!	#NULL!	#NULL!	#NULL!		0		0
412	2020-06-22	1	#NULL!	#NULL!	#NULL!	#NULL!	#NULL!	#NULL!	#NULL!		0		0
412	2020-06-29	1	#NULL!	#NULL!	#NULL!	#NULL!	#NULL!	#NULL!	#NULL!		0		0
412	2020-07-13	1	#NULL!	#NULL!	#NULL!	#NULL!	#NULL!	#NULL!	#NULL!		0		0
412	2020-07-06	1	#NULL!	#NULL!	#NULL!	#NULL!	#NULL!	#NULL!	#NULL!		0		0
412											0		0
413	2020-03-18	1	#NULL!	#NULL!	#NULL!	#NULL!	#NULL!	#NULL!	#NULL!		5	tylenol ` twice a day	8
413	2020-03-27	1	#NULL!	#NULL!	#NULL!	#NULL!	#NULL!	#NULL!	#NULL!		4	Tylenol extra strength as needed	0
413	2020-04-09	1	#NULL!	#NULL!	#NULL!	#NULL!	#NULL!	#NULL!	#NULL!		5	Tylenol	0
413	2020-04-03	1	#NULL!	#NULL!	#NULL!	#NULL!	#NULL!	#NULL!	#NULL!		5	Tylenol extra strength as needed	6
413											4.75		3.5
414	2020-04-15	1	#NULL!	1	#NULL!	#NULL!	#NULL!	#NULL!	#NULL!		0		0
414	2020-04-22	1	#NULL!	#NULL!	#NULL!	#NULL!	#NULL!	#NULL!	#NULL!		0		0
414	2020-04-29	1	#NULL!	#NULL!	#NULL!	#NULL!	#NULL!	#NULL!	#NULL!		0		0
414											0		0
415	2020-04-17	1	#NULL!	#NULL!	#NULL!	#NULL!	#NULL!	#NULL!	#NULL!		0		0
415	2020-04-22	1	#NULL!	#NULL!	#NULL!	#NULL!	#NULL!	#NULL!	#NULL!		0		0
415	2020-04-29	1	#NULL!	#NULL!	#NULL!	#NULL!	#NULL!	#NULL!	#NULL!		2		0
415	2020-05-14	1	#NULL!	#NULL!	#NULL!	#NULL!	#NULL!	#NULL!	#NULL!		3		0
415	2020-05-08	1	#NULL!	#NULL!	#NULL!	#NULL!	#NULL!	#NULL!	#NULL!		5		0
415											2		0
416	2020-04-09	1	#NULL!	#NULL!	#NULL!	#NULL!	#NULL!	#NULL!	#NULL!		0		0
416	2020-04-22	1	#NULL!	#NULL!	#NULL!	#NULL!	#NULL!	#NULL!	#NULL!		0		0
416	2020-02-24	1	#NULL!	#NULL!	#NULL!	#NULL!	#NULL!	#NULL!	#NULL!		0		0
416	2020-04-02	1	#NULL!	#NULL!	#NULL!	#NULL!	#NULL!	#NULL!	#NULL!		0		0
416											0		0
417	2020-04-16	1	#NULL!	#NULL!	#NULL!	#NULL!	#NULL!	#NULL!	#NULL!		7	Aleve tablet x 4 this week	8
417	2020-05-13	1	#NULL!	#NULL!	#NULL!	#NULL!	#NULL!	#NULL!	#NULL!		5		4
417											6		6
418	2020-04-17	1	#NULL!	#NULL!	#NULL!	#NULL!	#NULL!	#NULL!	1	Physical Therapy	5	Tylenol either once or twice day	0
418	2020-04-20	1	#NULL!	#NULL!	#NULL!	#NULL!	#NULL!	#NULL!	1	PT	4	Tylenol	1
418	2020-04-29	1	#NULL!	#NULL!	#NULL!	#NULL!	#NULL!	#NULL!	#NULL!		5	Alternating Tylenol & Ibuprofen	0
418											4.66667		0.333333
419	2020-04-09	1	#NULL!	1	#NULL!	#NULL!	#NULL!	#NULL!	#NULL!		3	Tylenol as needed	0
419	2020-04-15	1	#NULL!	1	#NULL!	#NULL!	#NULL!	#NULL!	#NULL!		0		0
419	2020-04-23	1	#NULL!	1	#NULL!	#NULL!	#NULL!	#NULL!	#NULL!		2	Tylenol	0
419	2020-04-03	1	#NULL!	1	#NULL!	#NULL!	#NULL!	#NULL!	#NULL!		3	Extra Strength Tylenol several times a day	0
419											2		0
421	2020-04-09	1	#NULL!	#NULL!	#NULL!	#NULL!	#NULL!	#NULL!	#NULL!		1		0
421	2020-04-15	1	#NULL!	#NULL!	#NULL!	#NULL!	#NULL!	#NULL!	#NULL!		0		0
421	2020-04-23	1	#NULL!	#NULL!	#NULL!	#NULL!	#NULL!	#NULL!	#NULL!		4	Taking Tylenol for sleep	3
421	2020-04-02	1	#NULL!	#NULL!	#NULL!	#NULL!	#NULL!	#NULL!	#NULL!		0		0
421											1.25		0.75
423	2020-04-02	1	#NULL!	#NULL!	#NULL!	#NULL!	#NULL!	#NULL!	#NULL!		2	Taking Tylenol for pain as needed	0
424	2020-06-19	1	#NULL!	#NULL!	#NULL!	#NULL!	#NULL!	#NULL!	#NULL!		1		0
424	2020-06-26	1	#NULL!	#NULL!	#NULL!	#NULL!	#NULL!	#NULL!	#NULL!		1		0
424	2020-07-02	1	#NULL!	#NULL!	#NULL!	#NULL!	#NULL!	#NULL!	#NULL!		1		0
424	2020-07-17	1	#NULL!	#NULL!	#NULL!	#NULL!	#NULL!	#NULL!	#NULL!		2		0
424	2020-07-24	1	#NULL!	#NULL!	#NULL!	#NULL!	#NULL!	#NULL!	#NULL!		2		0
424	2020-07-30	1	#NULL!	#NULL!	#NULL!	#NULL!	#NULL!	#NULL!	#NULL!		1		0
424	2020-07-06	1	#NULL!	#NULL!	#NULL!	#NULL!	#NULL!	#NULL!	#NULL!		1		0
424											1.28571		0
425	2020-06-22	1	1	#NULL!	#NULL!	#NULL!	#NULL!	#NULL!	#NULL!		1	tylenol	0
425	2020-06-29	1	1	#NULL!	#NULL!	#NULL!	#NULL!	#NULL!	#NULL!		1		0
425	2020-07-13	1	1	#NULL!	#NULL!	#NULL!	#NULL!	#NULL!	#NULL!		0		2
425	2020-07-20	1	1	#NULL!	#NULL!	#NULL!	#NULL!	#NULL!	#NULL!		1		2
425	2020-07-06	1	1	#NULL!	#NULL!	#NULL!	#NULL!	#NULL!	#NULL!		1	benadryl	0
425											0.8		0.8
427	2020-05-07	1	#NULL!	#NULL!	#NULL!	#NULL!	#NULL!	#NULL!	#NULL!		2		0
427	2020-05-15	1	#NULL!	#NULL!	#NULL!	#NULL!	#NULL!	#NULL!	#NULL!		5		0
427											3.5		0
428	2020-05-21	1	#NULL!	#NULL!	#NULL!	#NULL!	#NULL!	#NULL!	#NULL!		0		2
428	2020-05-28	1	#NULL!	1	#NULL!	#NULL!	#NULL!	#NULL!	#NULL!		0		0
428											0		1
429	2020-05-18	1	#NULL!	#NULL!	#NULL!	#NULL!	#NULL!	#NULL!	#NULL!		8	Tylenol as needed	2
429	2020-05-22	1	#NULL!	#NULL!	#NULL!	#NULL!	#NULL!	#NULL!	#NULL!		8		5
429	2020-06-01	1	#NULL!	#NULL!	#NULL!	#NULL!	#NULL!	#NULL!	#NULL!		8		9
429											8		5.33333
430	2020-06-26	1	#NULL!	1	#NULL!	#NULL!	#NULL!	#NULL!	#NULL!		5	Tylenol	0
430	2020-06-04	1	#NULL!	#NULL!	#NULL!	#NULL!	#NULL!	#NULL!	#NULL!		0		0
430											2.5		0
431	2020-03-08	1	1	#NULL!	1	#NULL!	#NULL!	#NULL!	#NULL!		4	Aleve 440mg daily	0
431	2020-04-13	1	1	#NULL!	1	#NULL!	#NULL!	#NULL!	#NULL!		2	Alleve 440 mg prn	3
431	2020-04-20	1	1	#NULL!	1	#NULL!	#NULL!	#NULL!	#NULL!		2	Alleve 220 mg prn	0
431	2020-04-27	1	1	#NULL!	1	#NULL!	#NULL!	#NULL!	#NULL!		2		0
431	2020-05-11	1	1	#NULL!	1	#NULL!	#NULL!	#NULL!	#NULL!		4	Tylenol and ibuprofen	1
431	2020-05-19	1	1	#NULL!	1	#NULL!	#NULL!	#NULL!	#NULL!		2	Alleve 440mg daily	0
431	2020-05-29	1	1	#NULL!	1	#NULL!	#NULL!	#NULL!	#NULL!		2	Ibuprofen 600 mg prn	3
431	2020-05-04	1	1	#NULL!	1	#NULL!	#NULL!	#NULL!	#NULL!		3		3
431	2020-06-07	1	1	#NULL!	1	#NULL!	#NULL!	#NULL!	#NULL!		2	ibuprofen 600 mg pro	2
431											2.625		1.33333
432	2020-05-11	1	#NULL!	#NULL!	#NULL!	#NULL!	#NULL!	#NULL!	#NULL!		0		0
432	2020-05-18	1	#NULL!	#NULL!	#NULL!	#NULL!	#NULL!	#NULL!	#NULL!		0		1
432	2020-05-26	1	#NULL!	#NULL!	#NULL!	#NULL!	#NULL!	#NULL!	#NULL!		0		1
432	2020-05-04	1	#NULL!	#NULL!	#NULL!	#NULL!	#NULL!	#NULL!	#NULL!		0		0
432											0		0.5
435	2020-06-18	1	#NULL!	#NULL!	#NULL!	#NULL!	#NULL!	#NULL!	#NULL!		2		3
435	2020-06-25	1	#NULL!	#NULL!	#NULL!	#NULL!	#NULL!	#NULL!	#NULL!		1		1
435	2020-06-01	1	#NULL!	#NULL!	#NULL!	#NULL!	#NULL!	#NULL!	#NULL!		0		1
435											1		1.66667
437	2020-04-22	1	#NULL!	#NULL!	#NULL!	#NULL!	#NULL!	#NULL!	#NULL!		6		0
437	2020-04-15	1	#NULL!	#NULL!	#NULL!	#NULL!	#NULL!	#NULL!	#NULL!		8	Tylenol	#NULL!
437	2020-05-06	1	#NULL!	#NULL!	#NULL!	#NULL!	#NULL!	#NULL!	#NULL!		8	Imitrex every day for migraines; Ibuprofen, 4 of the 200 mg tablets every day, also for migraine	7
437											7.33333		3.5
438	2020-06-30	1	#NULL!	#NULL!	#NULL!	#NULL!	#NULL!	#NULL!	#NULL!		0		0
438	2020-06-25	1	#NULL!	#NULL!	#NULL!	#NULL!	#NULL!	#NULL!	#NULL!		0		0
438											0		0
439	2020-05-14	1	#NULL!	#NULL!	#NULL!	#NULL!	#NULL!	#NULL!	#NULL!		7	2 advil in AM, 2 advil in PM	0
439	2020-05-21	1	#NULL!	#NULL!	#NULL!	#NULL!	#NULL!	#NULL!	#NULL!		7	Ibuprofen	0
439	2020-06-18	1	#NULL!	#NULL!	#NULL!	#NULL!	#NULL!	#NULL!	#NULL!		5	Advil all day and takes hydrocodone with tylenol at night before bed	0
439	2020-06-25	1	#NULL!	#NULL!	#NULL!	#NULL!	#NULL!	#NULL!	#NULL!		8	Ibuprofen during the day and hydrocodone to go to bed.	0
439	2020-06-04	1	#NULL!	#NULL!	#NULL!	#NULL!	#NULL!	#NULL!	#NULL!		8	ibuprofen and tylenol	0
439											7		0
441	2020-05-12	1	#NULL!	#NULL!	#NULL!	#NULL!	#NULL!	#NULL!	#NULL!		0		0
441	2020-05-19	1	#NULL!	#NULL!	#NULL!	#NULL!	#NULL!	#NULL!	#NULL!		1		0
441	2020-05-26	1	#NULL!	#NULL!	#NULL!	#NULL!	#NULL!	#NULL!	#NULL!		0		1
441											0.333333		0.333333
443	2020-12-21	1	#NULL!	#NULL!	#NULL!	#NULL!	#NULL!	#NULL!	#NULL!		1	Advil 2x200mg/night	0
443	2021-01-04	1	#NULL!	#NULL!	#NULL!	#NULL!	#NULL!	#NULL!	#NULL!		1		0
443	2021-01-11	1	#NULL!	#NULL!	#NULL!	#NULL!	#NULL!	#NULL!	#NULL!		1		0
443	2020-12-28	1	#NULL!	#NULL!	#NULL!	#NULL!	#NULL!	#NULL!	#NULL!		1	2x200mg/night	0
443											1		0
444	2021-01-04	1	#NULL!	#NULL!	#NULL!	#NULL!	#NULL!	#NULL!	#NULL!		0		0
445	2020-12-17	1	#NULL!	#NULL!	#NULL!	#NULL!	#NULL!	#NULL!	#NULL!		0		0
445	2020-12-22	1	#NULL!	#NULL!	#NULL!	#NULL!	#NULL!	#NULL!	#NULL!		8		0
445	2020-12-28	1	#NULL!	#NULL!	#NULL!	#NULL!	#NULL!	#NULL!	#NULL!		4		0
445	2021-01-12	1	#NULL!	#NULL!	#NULL!	#NULL!	#NULL!	#NULL!	#NULL!		0		0
445	2021-01-19	1	#NULL!	#NULL!	#NULL!	#NULL!	#NULL!	#NULL!	#NULL!		0		0
445	2021-01-04	1	#NULL!	#NULL!	#NULL!	#NULL!	#NULL!	#NULL!	#NULL!		0		0
445											2		0
446	2020-12-14	1	#NULL!	#NULL!	#NULL!	#NULL!	#NULL!	#NULL!	#NULL!		3		0
447	2020-12-21	1	#NULL!	1	#NULL!	#NULL!	#NULL!	#NULL!	#NULL!		4	Tylenol 1x200mg PRN	0
447	2021-01-04	1	#NULL!	1	#NULL!	#NULL!	#NULL!	#NULL!	#NULL!		0		0
447	2021-01-15	1	#NULL!	#NULL!	#NULL!	#NULL!	#NULL!	#NULL!	#NULL!		3		0
447											2.33333		0
448	2020-12-14	1	#NULL!	#NULL!	#NULL!	1	1	#NULL!	#NULL!		0		0
449	2020-12-22	1	#NULL!	#NULL!	#NULL!	#NULL!	#NULL!	#NULL!	#NULL!		0		0
449	2021-01-05	1	#NULL!	#NULL!	#NULL!	#NULL!	#NULL!	#NULL!	#NULL!		5	1x Ibuprofen	0
449	2021-01-26	1	#NULL!	#NULL!	#NULL!	#NULL!	#NULL!	#NULL!	#NULL!		0		0
449	2021-01-19	1	#NULL!	#NULL!	#NULL!	#NULL!	#NULL!	#NULL!	#NULL!		0		0
449											1.25		0
452	2021-01-18	1	#NULL!	#NULL!	#NULL!	#NULL!	#NULL!	#NULL!	#NULL!		0		0
452	2021-01-20	1	#NULL!	#NULL!	#NULL!	#NULL!	#NULL!	#NULL!	#NULL!		0		0
452	2021-01-26	1	#NULL!	#NULL!	#NULL!	#NULL!	#NULL!	#NULL!	#NULL!		7	Aleve 220 mg 2-3 times a day	0
452											2.33333		0
455	2021-01-13	1	#NULL!	#NULL!	#NULL!	#NULL!	#NULL!	#NULL!	#NULL!		0		1
455	2021-01-20	1	#NULL!	#NULL!	#NULL!	#NULL!	#NULL!	#NULL!	#NULL!		0		0
455	2021-01-27	1	#NULL!	#NULL!	#NULL!	#NULL!	#NULL!	#NULL!	#NULL!		2		0
455	2021-02-09	1	#NULL!	#NULL!	#NULL!	#NULL!	#NULL!	#NULL!	#NULL!		2		5
455	2021-02-02	1	#NULL!	#NULL!	#NULL!	#NULL!	#NULL!	#NULL!	#NULL!		0		4
455											0.8		2
456	2020-12-23	1	#NULL!	#NULL!	#NULL!	#NULL!	#NULL!	#NULL!	#NULL!		0		0
456	2020-12-30	1	#NULL!	#NULL!	#NULL!	#NULL!	#NULL!	#NULL!	#NULL!		0		0
456	2021-01-13	1	#NULL!	#NULL!	#NULL!	#NULL!	#NULL!	#NULL!	#NULL!		0		0
456	2021-01-20	1	#NULL!	#NULL!	#NULL!	#NULL!	#NULL!	#NULL!	#NULL!		0		0
456	2021-01-05	1	#NULL!	#NULL!	#NULL!	#NULL!	#NULL!	#NULL!	#NULL!		0		0
456											0		0
457	2021-01-05	1	#NULL!	#NULL!	#NULL!	#NULL!	#NULL!	#NULL!	#NULL!		5	Alieve	0
457	2021-01-20	1	#NULL!	#NULL!	#NULL!	#NULL!	#NULL!	#NULL!	1	Physical therapy	5	Motrin 1x/day	0
457	2021-01-25	1	#NULL!	#NULL!	#NULL!	#NULL!	#NULL!	#NULL!	1	Physical therapy	3		0
457	2021-02-01	1	#NULL!	#NULL!	#NULL!	#NULL!	#NULL!	#NULL!	1	Physical therapy	2	Gabapentin	2
457	2021-01-11	1	#NULL!	#NULL!	#NULL!	#NULL!	#NULL!	#NULL!	#NULL!		8	Motrin (400 mg)	0
457											4.6		0.4
459	2021-02-09	1	#NULL!	1	#NULL!	#NULL!	#NULL!	#NULL!	#NULL!		1	Tylenol 1-2x500mg PRN, Meloxicam 1x7.5mg with dinner, Gabapentin 1x300mg at night	0
459	2021-02-15	1	#NULL!	1	#NULL!	#NULL!	#NULL!	#NULL!	#NULL!		0		0
459											0.5		0
460	2021-01-21	1	#NULL!	#NULL!	#NULL!	#NULL!	#NULL!	#NULL!	#NULL!		2		0
465	2021-02-15	1	#NULL!	#NULL!	#NULL!	#NULL!	#NULL!	#NULL!	#NULL!		0		0

## Sheet: Old RIN Data
ID	AvgInt	Nausea	Age	SurgType	Side	TX_Dummy	AvgPain	PONV	Motion	FamilyHX	PINV	Eth	SmokeHX	ER	PR	Neoadj	Hand
172	0.5	1	71	Segmental Mastectomy	Right	0	3	1	0	0	0	0	0	1	1	0	0
216	0	0	47	Segmental Mastectomy	Left	1	4	1	1	1	1	0	0	1	1	0	0
228	0.5	1	32	Mastectomy	Left	0	1.3	0	1	0	1	0	0	1	1	0	1
231	2	1	68	Mastectomy	Left	0	6.35	0	0	0	0	0	0	1	1	0	0
235	4.66667	1	42	Mastectomy	Bilateral	0	1.7	0	1	0	1	0	0	1	0	0	0
258	4	1	55	Mastectomy	Bilateral	0	1	0	1	0	1	0	0	1	1	0	0
263	1	1	70	Segmental Mastectomy	Right	0	3	1	0	0	1	0	0	1	1	0	0
266	0	0	59	Segmental Mastectomy	Left	0	1	1	1	0	0	0	0	1	0	0	0
267	1.33333	1	55	Segmental Mastectomy	Left	1	0.5	0	1	1	1	0	0	0	0	0	0
269	0	0	67	Segmental Mastectomy	Left	0	0	0	0	0	0	1	1	1	1	0	0
279
270	3	1	43	Segmental Mastectomy	Left	1	4.5	0	0	0	0	0	0	1	1	1	0
271	0	0	55	Segmental Mastectomy	Right	0	2	1	0	1	0	0	0	1	1	0	0
273	0	0	60	Mastectomy	Right	1	5	0	1	0	0	0	0	1	0	1	0
274	0.5	1	66	Segmental Mastectomy	Left	0	0	0	1	0	1	0	2	0	0	0	0
275	0	0	44	Mastectomy	Right	1	0.5	0	0	0	0	0	0	0	0	1	0
276	0	0	71	Segmental Mastectomy	Left	0	0	0	1	0	1	0	0	0	0	0	0
278	0	0	74	Segmental Mastectomy	Left	0	0	0	1	0	1	0	0	1	1	0	0
279	0.666667	1	36	Segmental mastectomy	Left	1	0	0	0	0	0	1	0	0	0	1	0
281	0	0	50	Segmental Mastectomy	Right	0	0	0	0	0	1	0	2	1	1	0	0
282	0	0	66	Segmental Mastectomy	Left	0	0	0	0	0	0	0	1	0	0	0	0
285	0	0	69	Segmental Mastectomy	Right	1	0	1	0	0	0	0	2	1	1	0	0
287	0	0	52	Segmental Mastectomy	Left	1	0	0	0	0	0	0	0	0	0	0	1
290	3	1	73	Segmental mastectomy	Right	1	0	0	1	0	0	0	0	1	1	1	0
292	1	1	50	Mastectomy	Right	0	0	0	1	0	1	0	0	1	1	0	0
293	3	1	56	Segmental mastectomy	Right	0	5	0	0	1	0	1	0	0	0	0	0
294	0	0	61	Segmental Mastectomy	Right	0	2.5	0	0	0	0	0	0	1	1	0	0
296	0	0	69	Segmental Mastectomy	Left	0	0	0	1	0	1	0	2	1	1	0	0
297	0	0	52	Mastectomy	Bilateral	0	3	0	0	1	0	0	0	1	1	0	0
300	0	0	67	Segmental Mastectomy	Right	0	0	0	0	0	0	1	0	1	0	0	0
302	0	0	39	Mastectomy	Left	1	2	0	0	0	0	1	2	1	0	1	0
305	0	0	71	Segmental Mastectomy	Left	0	3	0	0	0	1	0	0	0	0	0	0
306	0	0	70	Segmental Mastectomy	Right	0	0	0	0	0	0	0	2	1	1	0	0
307	0.25	1	54	Mastectomy	Right	1	2	0	1	0	1	0	2	0	0	1	0
309	0	0	71	Segmental Mastectomy	Right	0	5	0	0	1	0	1	2	1	1	0	0
311	0	0	53	Segmental Mastectomy	Right	0	1	0	0	0	0	1	0	1	1	0	0
313	10	1	44	Re-Excision	Left	0	10	1	0	1	0	0	2	1	1	0	1
316	0.666667	1	66	Re-Excision	Right	0	2.25	1	0	1	0	0	1	1	1	0	0
317	0	0	52	Segmental Mastectomy	Left	0	2	1	1	0	0	0	0	1	1	0	0
320	2	1	43	Segmental mastectomy	Left	0	0.75	0	0	1	0	0	1	1	1	0	0
321	1	1	43	Mastectomy	Right	0	2	0	1	0	1	0	0	1	1	0	0
322	0	0	62	Segmental Mastectomy	Right	0	0	0	0	0	0	0	2	1	1	0	1
324	0	0	28	Mastectomy	Bilateral	1	0.75	0	0	0	0	0	0	1	1	1	0
325	1	1	51	Segmental mastectomy	Left	0	2.5	0	1	1	0	0	0	0	0	1	0
327	0	0	66	Segmental Mastectomy	Left	0	0.33	0	1	0	0	0	0	1	1	0	0
328	0	0	76	Segmental Mastectomy	Left	0	0	0	0	0	0	0	2	0	1	0	0
330	0	0	69	Segmental Mastectomy	Left	1	1	0	0	0	0	0	0	1	1	0	0
331	5	1	69	Segmental mastectomy	Left	0	5	1	1	1	1	0	2	1	1	0	0
332	1	1	58	Segmental mastectomy	Right	1	0	0	0	0	0	0	2	0	0	1	0
333	0	0	56	Segmental Mastectomy	Right	0	2	0	1	0	1	0	0	0	1	0	0
334	0	0	76	Segmental Mastectomy	Right	0	3.5	0	1	0	0	0	2	1	1	0	0
336	0	0	68	Segmental Mastectomy	Left	0	0	1	0	0	0	0	2	1	1	0	1
337	0	0	76	Mastectomy	Right	0	0	1	0	0	0	0	0	1	1	0	0
338	8.33333	1	49	Segmental Mastectomy	Right	0	7	0	1	1	1	1	0	0	0	0	0
339	4	1	57	Mastectomy	Left	0	6.7	1	0	0	0	0	1	1	1	1	0
340	1	1	61	Mastectomy	Right	0	7.35	1	1	0	0	0	0	1	1	1	0
342	0.5	1	69	Segmental Mastectomy	Left	0	2.75	0	0	0	1	0	0	1	1	0	0
343	0	0	50	Segmental Mastectomy	Left	0	1	0	0	0	0	0	2	1	1	0	0
345	0	0	47	Segmental Mastectomy	Right	0	2.5	0	0	1	1	0	0	1	1	0	0
348	0	0	65	Segmental Mastectomy	Left	0	0	1	1	1	0	0	0	0	1	1	0
349	3.5	1	74	Segmental Mastectomy	Left	0	5.7	1	0	1	1	0	0	1	1	0	0
351	0	0	63	Segmental Mastectomy	Right	0	0	0	0	0	0	0	0	1	1	0	1
352	0	0	41	Segmental Mastectomy	Right	0	3	1	1	1	1	1	2	1	1	0	0
353	1	1	80	Segmental Mastectomy	Left	1	7	0	0	1	0	0	0	1	1	0	0
354	0	0	72	Segmental Mastectomy	Bilateral	0	2.33333	0	0	1	1	0	0	1	1	0	0
356	0.5	1	44	Mastectomy	Bilateral	0	2	0	0	0	0	0	0	0	0	1	0
358	2.66667	1	60	Segmental Mastectomy	Right	0	1	0	1	1	0	0	2	1	1	0	0
359	0	0	61	Segmental Mastectomy	Left	0	0	0	0	0	0	0	2	0	0	0	0
360	0	0	38	Segmental Mastectomy	Right	0	2.8	0	1	1	1	0	2	0	0	1	1
361	5	1	66	Mastectomy	Right	0	7	0	0	0	1	0	1	0	1	0	0
363	0	0	59	Segmental Mastectomy	Left	0	0	0	0	0	0	0	0	1	1	0	0
364	0	0	50	Segmental Mastectomy	Right	0	0	1	1	1	0	0	0	1	1	0	0
365	0	0	69	Mastectomy	Bilateral	0	0	0	0	1	0	0	0	1	1	0	0
366	2	1	67	Segmental Mastectomy	Left	1	8	1	0	0	1	0	2	1	1	1	0
370	4	1	59	Segmental Mastectomy	Left	0	3.5	0	1	0	0	1	0	1	1	0	0
374	0	0	68	Segmental Mastectomy	Left	0	0	0	1	0	1	0	2	1	1	0	0
375	2	1	56	Segmental Mastectomy	Left	0	1	0	1	0	1	0	0	1	1	0	0
378	0	0	62	Mastectomy	Right	0	1	0	0	0	0	1	0	1	1	0	0
379	0	0	54	Segmental Mastectomy	Right	0	0	0	0	0	0	0	0	1	1	0	1
384	3.66667	1	50	Mastectomy	Right	0	3.3	0	0	1	0	0	0	1	1	0	0
386	0	0	45	Mastectomy	Left	0	0	0	0	0	1	0	0	1	1	0	0
387	0	0	72	Segmental Mastectomy	Right	0	1	0	0	0	0	0	0	1	1	0	0
389	0	0	72	Segmental Mastectomy	Left	0	0	0	0	0	0	0	2	1	1	0	1
390	0	0	62	Segmental Mastectomy	Left	0	0.25	0	1	0	0	0	0	1	1	1	0
391	0.333	1	61	Segmental Mastectomy	Right	1	1	0	1	0	0	0	0	1	1	0	0
393	0	0	65	Segmental Mastectomy	Left	0	0	0	0	0	0	0	0	1	1	0	1
396	0	0	70	Segmental Mastectomy	Left	0	2	0	0	0	0	1	0	1	1	0	0
397	0	0	62	Mastectomy	Bilateral	0	0	0	0	0	0	0	0	0	0	1	0
398	0.5	1	35	Other	Left	0	2	0	1	0	0	0	0	0	0	1	0
399	0	0	61	Mastectomy	Bilateral	1	0	0	0	0	0	0	2	0	0	1	0
401	0.5	1	77	Segmental Mastectomy	Left	0	1	1	0	0	0	0	2	0	0	0	0
402	3	1	64	Segmental Mastectomy	Left	0	1.5	1	1	0	1	0	0	1	1	0	0
403	0	0	51	Segmental Mastectomy	Left	0	0	0	0	0	0	0	0	1	1	1	0
404	0	0	61	Segmental Mastectomy	Left	0	2	0	1	0	1	0	0	1	1	0	0
406	0	0	59	Segmental Mastectomy	Right	0	0	1	1	0	0	0	0	1	1	0	0
409	0.333	1	65	Segmental Mastectomy	Right	0	0	0	1	0	0	0	0	0	0	0	1
410	0	0	41	Mastectomy	Left	0	0	0	0	0	0	0	0	1	1	0	0
411	0	0	54	Re-Excision	Left	0	2.71429	0	1	0	1	0	2	0	0	1	0
413	3.5	1	60	Segmental Mastectomy	Left	0	4.75	0	0	0	1	0	2	1	0	1	0
414	0	0	54	Segmental Mastectomy	Left	1	0	1	0	0	1	0	0	1	1	0	0
415	0	0	69	Segmental Mastectomy	Right	0	1	0	0	0	0	0	0	1	1	0	0
416	0	0	77	Segmental Mastectomy	Right	0	0	0	0	0	0	0	2	1	1	0	0
417	6	1	53	Mastectomy	Bilateral	0	7	0	0	0	1	0	1	0	0	1	0
419	0	0	71	Segmental Mastectomy	Right	1	2	0	0	1	0	0	2	1	1	0	0
421	0	0	57	Segmental Mastectomy	Left	0	0	0	0	0	0	1	2	1	1	0	0
423	0	0	71	Segmental Mastectomy	Right	0	2	0	0	0	1	0	1	0	0	0	0
437	0	0	47	Segmental Mastectomy	Left	0	6	1	1	0	0	0	0	1	1	0	0

## Sheet: weekly
RecordedDate	ID	date	Q40	Q48_1	Q48_2	Q48_3	Q48_4	Q48_5	Q48_6	Q48_7	Q48_8	Q48_9	Q48_9_TEXT	Q41	PROMIS001	PROMIS002	PROMIS003	PROMIS004	PROMIS005	PROMIS006	PROMIS007	PROMIS008	PROMIS009	PROMIS010	PROMIS011	PROMIS012	PROMIS013	PROMIS014	PROMIS015	PROMIS016	PROMIS017	PROMIS018	PROMIS019	PROMIS020	PROMIS021	PROMIS022	PROMIS023	PROMIS024	Q10_NPS_GROUP	PROMIS029	Q53_1	Q53_2	Q53_3	Q53_4	Q53_4_TEXT	PROMIS025	PROMIS026	PROMIS027	PROMIS028
2018-05-24 19:26:45	172	2018-05-24		#NULL!	1	#NULL!	#NULL!	#NULL!	#NULL!	#NULL!	#NULL!	#NULL!		#NULL!	2	3	3	2	1	1	1	3	1	1	2	1	3	2	2	2	3	2	2	2	1	2	1	1	1	3	#NULL!	#NULL!	#NULL!	#NULL!		1	2	1	2
2018-05-30 19:49:59	172	2018-05-30		#NULL!	1	#NULL!	#NULL!	#NULL!	#NULL!	#NULL!	#NULL!	#NULL!		#NULL!	2	2	2	2	1	1	1	2	1	1	2	1	3	3	3	3	3	2	4	4	3	3	3	3	1	3	#NULL!	#NULL!	#NULL!	#NULL!		2	2	1	2
2018-06-05 16:16:03	172	2018-07-14		#NULL!	1	#NULL!	#NULL!	#NULL!	#NULL!	#NULL!	#NULL!	#NULL!		#NULL!	2	2	2	2	1	1	1	2	1	1	2	1	3	3	3	3	3	2	3	3	2	2	2	2	1	3	#NULL!	#NULL!	#NULL!	#NULL!		1	1	1	1
2018-06-14 15:24:56	172	2018-07-14		#NULL!	1	#NULL!	#NULL!	#NULL!	#NULL!	#NULL!	#NULL!	#NULL!		#NULL!	2	2	2	1	1	1	1	1	1	1	1	1	5	4	4	4	3	2	3	3	2	2	3	2	1	3	#NULL!	#NULL!	#NULL!	#NULL!		2	1	1	1
2019-01-08 13:48:11	185	2019-01-08	Good	#NULL!	1	#NULL!	#NULL!	#NULL!	#NULL!	#NULL!	#NULL!	#NULL!		0	#NULL!	#NULL!	#NULL!	#NULL!	#NULL!	#NULL!	#NULL!	#NULL!	#NULL!	#NULL!	#NULL!	#NULL!	#NULL!	#NULL!	#NULL!	#NULL!	#NULL!	#NULL!	#NULL!	#NULL!	#NULL!	#NULL!	#NULL!	#NULL!	1	0	#NULL!	#NULL!	#NULL!	#NULL!		#NULL!	#NULL!	#NULL!	#NULL!
2019-01-14 16:10:06	185	2019-01-14	good	#NULL!	1	#NULL!	#NULL!	#NULL!	#NULL!	#NULL!	#NULL!	#NULL!		0	#NULL!	#NULL!	#NULL!	#NULL!	#NULL!	#NULL!	#NULL!	#NULL!	#NULL!	#NULL!	#NULL!	#NULL!	#NULL!	#NULL!	#NULL!	#NULL!	#NULL!	#NULL!	#NULL!	#NULL!	#NULL!	#NULL!	#NULL!	#NULL!	1	0	#NULL!	#NULL!	#NULL!	#NULL!		#NULL!	#NULL!	#NULL!	#NULL!
2018-08-20 10:16:34	194	2018-08-20	Going through radiation treatment and felt kinda nauseated for a few hours after and saturday. started Thursday	#NULL!	1	#NULL!	#NULL!	#NULL!	#NULL!	#NULL!	#NULL!	#NULL!		1	#NULL!	#NULL!	#NULL!	#NULL!	#NULL!	#NULL!	#NULL!	#NULL!	#NULL!	#NULL!	#NULL!	#NULL!	#NULL!	#NULL!	#NULL!	#NULL!	#NULL!	#NULL!	#NULL!	#NULL!	#NULL!	#NULL!	#NULL!	#NULL!	1	0	#NULL!	#NULL!	#NULL!	#NULL!		#NULL!	#NULL!	#NULL!	#NULL!
2018-09-17 16:31:23	198	2018-09-17	Good	#NULL!	1	#NULL!	#NULL!	#NULL!	#NULL!	#NULL!	#NULL!	#NULL!		0	#NULL!	#NULL!	#NULL!	#NULL!	#NULL!	#NULL!	#NULL!	#NULL!	#NULL!	#NULL!	#NULL!	#NULL!	#NULL!	#NULL!	#NULL!	#NULL!	#NULL!	#NULL!	#NULL!	#NULL!	#NULL!	#NULL!	#NULL!	#NULL!	1	3	#NULL!	#NULL!	#NULL!	#NULL!		2	2	3	2
2018-09-25 19:09:25	198	2018-09-25	Good	#NULL!	1	#NULL!	#NULL!	#NULL!	#NULL!	#NULL!	#NULL!	#NULL!		1	5	1	3	3	3	1	1	1	1	1	1	1	4	4	3	3	3	2	2	2	3	3	2	3	1	3	#NULL!	#NULL!	#NULL!	#NULL!		3	3	2	2
2018-09-18 09:52:05	202	2018-09-17	okay	#NULL!	1	#NULL!	#NULL!	#NULL!	#NULL!	#NULL!	#NULL!	#NULL!		1	2	1	1	1	1	2	1	2	1	1	2	1	4	3	4	3	3	3	2	1	1	2	2	3	1	6	#NULL!	#NULL!	#NULL!	#NULL!		3	3	3	3
2018-10-17 09:15:30	204	2018-10-17	tired	#NULL!	1	#NULL!	1	#NULL!	#NULL!	#NULL!	#NULL!	#NULL!		1	2	2	2	2	1	1	1	1	1	1	1	1	3	2	3	3	2	2	3	3	2	2	2	2	1	5	#NULL!	#NULL!	#NULL!	#NULL!		2	2	2	2
2018-11-08 15:02:05	204	2018-11-08	Tired	#NULL!	1	#NULL!	1	#NULL!	#NULL!	#NULL!	#NULL!	#NULL!		0	#NULL!	#NULL!	#NULL!	#NULL!	#NULL!	#NULL!	#NULL!	#NULL!	#NULL!	#NULL!	#NULL!	#NULL!	#NULL!	#NULL!	#NULL!	#NULL!	#NULL!	#NULL!	#NULL!	#NULL!	#NULL!	#NULL!	#NULL!	#NULL!	1	6	#NULL!	#NULL!	#NULL!	#NULL!		2	2	2	2
2018-11-12 16:12:04	204	2018-11-12	Tired	#NULL!	1	#NULL!	1	#NULL!	#NULL!	#NULL!	#NULL!	#NULL!		0	#NULL!	#NULL!	#NULL!	#NULL!	#NULL!	#NULL!	#NULL!	#NULL!	#NULL!	#NULL!	#NULL!	#NULL!	#NULL!	#NULL!	#NULL!	#NULL!	#NULL!	#NULL!	#NULL!	#NULL!	#NULL!	#NULL!	#NULL!	#NULL!	2	7	#NULL!	#NULL!	#NULL!	#NULL!		2	2	2	2
2018-09-17 14:57:01	205	2018-09-17	Pretty good	#NULL!	1	#NULL!	#NULL!	#NULL!	#NULL!	#NULL!	#NULL!	#NULL!		0	#NULL!	#NULL!	#NULL!	#NULL!	#NULL!	#NULL!	#NULL!	#NULL!	#NULL!	#NULL!	#NULL!	#NULL!	#NULL!	#NULL!	#NULL!	#NULL!	#NULL!	#NULL!	#NULL!	#NULL!	#NULL!	#NULL!	#NULL!	#NULL!	1	1	#NULL!	#NULL!	#NULL!	#NULL!		1	1	1	1
2018-09-25 11:45:41	205	2018-09-25	Pretty good	#NULL!	1	#NULL!	#NULL!	#NULL!	#NULL!	#NULL!	#NULL!	#NULL!		0	#NULL!	#NULL!	#NULL!	#NULL!	#NULL!	#NULL!	#NULL!	#NULL!	#NULL!	#NULL!	#NULL!	#NULL!	#NULL!	#NULL!	#NULL!	#NULL!	#NULL!	#NULL!	#NULL!	#NULL!	#NULL!	#NULL!	#NULL!	#NULL!	1	1	#NULL!	#NULL!	#NULL!	#NULL!		1	1	1	1
2018-10-08 11:08:02	205	2018-10-08	Pretty good	#NULL!	1	#NULL!	#NULL!	#NULL!	#NULL!	#NULL!	#NULL!	#NULL!		0	#NULL!	#NULL!	#NULL!	#NULL!	#NULL!	#NULL!	#NULL!	#NULL!	#NULL!	#NULL!	#NULL!	#NULL!	#NULL!	#NULL!	#NULL!	#NULL!	#NULL!	#NULL!	#NULL!	#NULL!	#NULL!	#NULL!	#NULL!	#NULL!	1	2	#NULL!	#NULL!	#NULL!	#NULL!		2	1	1	1
2018-09-18 11:17:53	207	2018-09-18	fine	#NULL!	1	#NULL!	#NULL!	#NULL!	#NULL!	#NULL!	#NULL!	#NULL!		0	#NULL!	#NULL!	#NULL!	#NULL!	#NULL!	#NULL!	#NULL!	#NULL!	#NULL!	#NULL!	#NULL!	#NULL!	#NULL!	#NULL!	#NULL!	#NULL!	#NULL!	#NULL!	#NULL!	#NULL!	#NULL!	#NULL!	#NULL!	#NULL!	1	0	#NULL!	#NULL!	#NULL!	#NULL!		#NULL!	#NULL!	#NULL!	#NULL!
2018-09-25 14:03:15	207	2018-09-25	doing gtreat	#NULL!	1	#NULL!	#NULL!	#NULL!	#NULL!	#NULL!	#NULL!	#NULL!		0	#NULL!	#NULL!	#NULL!	#NULL!	#NULL!	#NULL!	#NULL!	#NULL!	#NULL!	#NULL!	#NULL!	#NULL!	#NULL!	#NULL!	#NULL!	#NULL!	#NULL!	#NULL!	#NULL!	#NULL!	#NULL!	#NULL!	#NULL!	#NULL!	1	0	#NULL!	#NULL!	#NULL!	#NULL!		#NULL!	#NULL!	#NULL!	#NULL!
2018-10-08 22:22:47	209	2018-10-08	Good	#NULL!	1	#NULL!	#NULL!	#NULL!	#NULL!	#NULL!	#NULL!	#NULL!		0	#NULL!	#NULL!	#NULL!	#NULL!	#NULL!	#NULL!	#NULL!	#NULL!	#NULL!	#NULL!	#NULL!	#NULL!	#NULL!	#NULL!	#NULL!	#NULL!	#NULL!	#NULL!	#NULL!	#NULL!	#NULL!	#NULL!	#NULL!	#NULL!	1	1	#NULL!	#NULL!	#NULL!	#NULL!		2	2	2	2
2018-10-15 20:35:30	209	2018-10-15	Tired but good	#NULL!	1	#NULL!	#NULL!	#NULL!	#NULL!	#NULL!	#NULL!	#NULL!		0	#NULL!	#NULL!	#NULL!	#NULL!	#NULL!	#NULL!	#NULL!	#NULL!	#NULL!	#NULL!	#NULL!	#NULL!	#NULL!	#NULL!	#NULL!	#NULL!	#NULL!	#NULL!	#NULL!	#NULL!	#NULL!	#NULL!	#NULL!	#NULL!	1	1	#NULL!	#NULL!	#NULL!	#NULL!		2	2	1	2
2018-10-23 21:01:00	209	2018-10-23	Tired but good	#NULL!	1	#NULL!	#NULL!	#NULL!	#NULL!	#NULL!	#NULL!	#NULL!		0	#NULL!	#NULL!	#NULL!	#NULL!	#NULL!	#NULL!	#NULL!	#NULL!	#NULL!	#NULL!	#NULL!	#NULL!	#NULL!	#NULL!	#NULL!	#NULL!	#NULL!	#NULL!	#NULL!	#NULL!	#NULL!	#NULL!	#NULL!	#NULL!	1	0	#NULL!	#NULL!	#NULL!	#NULL!		#NULL!	#NULL!	#NULL!	#NULL!
2018-11-05 14:40:02	209	2018-11-05	Tired but otherwise ok	#NULL!	1	#NULL!	#NULL!	#NULL!	#NULL!	#NULL!	#NULL!	#NULL!		0	#NULL!	#NULL!	#NULL!	#NULL!	#NULL!	#NULL!	#NULL!	#NULL!	#NULL!	#NULL!	#NULL!	#NULL!	#NULL!	#NULL!	#NULL!	#NULL!	#NULL!	#NULL!	#NULL!	#NULL!	#NULL!	#NULL!	#NULL!	#NULL!	1	1	#NULL!	#NULL!	#NULL!	#NULL!		2	2	2	2
2018-10-17 11:00:07	210	2018-10-17	tired	#NULL!	1	#NULL!	#NULL!	#NULL!	#NULL!	#NULL!	#NULL!	#NULL!		1	5	1	5	2	4	3	4	4	1	1	3	1	4	5	4	4	2	1	4	5	4	4	4	4	1	5	#NULL!	#NULL!	#NULL!	#NULL!		4	4	4	4
2018-09-25 18:20:48	211	2018-09-25	Good	#NULL!	1	#NULL!	#NULL!	#NULL!	#NULL!	#NULL!	#NULL!	#NULL!		0	#NULL!	#NULL!	#NULL!	#NULL!	#NULL!	#NULL!	#NULL!	#NULL!	#NULL!	#NULL!	#NULL!	#NULL!	#NULL!	#NULL!	#NULL!	#NULL!	#NULL!	#NULL!	#NULL!	#NULL!	#NULL!	#NULL!	#NULL!	#NULL!	1	1	#NULL!	#NULL!	#NULL!	#NULL!		1	1	1	2
2018-10-10 18:59:07	211	2018-10-10	Good	#NULL!	1	#NULL!	#NULL!	#NULL!	#NULL!	#NULL!	#NULL!	#NULL!		0	#NULL!	#NULL!	#NULL!	#NULL!	#NULL!	#NULL!	#NULL!	#NULL!	#NULL!	#NULL!	#NULL!	#NULL!	#NULL!	#NULL!	#NULL!	#NULL!	#NULL!	#NULL!	#NULL!	#NULL!	#NULL!	#NULL!	#NULL!	#NULL!	1	3	#NULL!	#NULL!	#NULL!	#NULL!		3	3	3	3
2018-10-15 13:26:43	211	2018-10-15	Good	#NULL!	1	#NULL!	#NULL!	#NULL!	#NULL!	#NULL!	#NULL!	#NULL!		0	#NULL!	#NULL!	#NULL!	#NULL!	#NULL!	#NULL!	#NULL!	#NULL!	#NULL!	#NULL!	#NULL!	#NULL!	#NULL!	#NULL!	#NULL!	#NULL!	#NULL!	#NULL!	#NULL!	#NULL!	#NULL!	#NULL!	#NULL!	#NULL!	1	6	#NULL!	#NULL!	#NULL!	#NULL!		3	3	3	3
2018-10-23 17:29:08	211	2018-10-23	Good	#NULL!	1	#NULL!	#NULL!	#NULL!	#NULL!	#NULL!	#NULL!	#NULL!		0	#NULL!	#NULL!	#NULL!	#NULL!	#NULL!	#NULL!	#NULL!	#NULL!	#NULL!	#NULL!	#NULL!	#NULL!	#NULL!	#NULL!	#NULL!	#NULL!	#NULL!	#NULL!	#NULL!	#NULL!	#NULL!	#NULL!	#NULL!	#NULL!	1	3	#NULL!	#NULL!	#NULL!	#NULL!		3	3	2	2
2018-09-19 06:39:59	213	2018-09-19	good	#NULL!	1	#NULL!	#NULL!	#NULL!	#NULL!	#NULL!	#NULL!	#NULL!		0	#NULL!	#NULL!	#NULL!	#NULL!	#NULL!	#NULL!	#NULL!	#NULL!	#NULL!	#NULL!	#NULL!	#NULL!	#NULL!	#NULL!	#NULL!	#NULL!	#NULL!	#NULL!	#NULL!	#NULL!	#NULL!	#NULL!	#NULL!	#NULL!	1	0	#NULL!	#NULL!	#NULL!	#NULL!		#NULL!	#NULL!	#NULL!	#NULL!
2018-09-26 09:29:26	213	2018-09-26	good	#NULL!	1	#NULL!	#NULL!	#NULL!	#NULL!	#NULL!	#NULL!	#NULL!		0	#NULL!	#NULL!	#NULL!	#NULL!	#NULL!	#NULL!	#NULL!	#NULL!	#NULL!	#NULL!	#NULL!	#NULL!	#NULL!	#NULL!	#NULL!	#NULL!	#NULL!	#NULL!	#NULL!	#NULL!	#NULL!	#NULL!	#NULL!	#NULL!	1	0	#NULL!	#NULL!	#NULL!	#NULL!		#NULL!	#NULL!	#NULL!	#NULL!
2018-10-09 17:42:38	213	2018-10-09	good	#NULL!	1	#NULL!	#NULL!	#NULL!	#NULL!	#NULL!	#NULL!	#NULL!		0	#NULL!	#NULL!	#NULL!	#NULL!	#NULL!	#NULL!	#NULL!	#NULL!	#NULL!	#NULL!	#NULL!	#NULL!	#NULL!	#NULL!	#NULL!	#NULL!	#NULL!	#NULL!	#NULL!	#NULL!	#NULL!	#NULL!	#NULL!	#NULL!	1	0	#NULL!	#NULL!	#NULL!	#NULL!		#NULL!	#NULL!	#NULL!	#NULL!
2018-10-15 12:39:03	213	2018-10-15	great	#NULL!	1	#NULL!	#NULL!	#NULL!	#NULL!	#NULL!	#NULL!	#NULL!		0	#NULL!	#NULL!	#NULL!	#NULL!	#NULL!	#NULL!	#NULL!	#NULL!	#NULL!	#NULL!	#NULL!	#NULL!	#NULL!	#NULL!	#NULL!	#NULL!	#NULL!	#NULL!	#NULL!	#NULL!	#NULL!	#NULL!	#NULL!	#NULL!	1	0	#NULL!	#NULL!	#NULL!	#NULL!		#NULL!	#NULL!	#NULL!	#NULL!
2019-02-26 11:47:23	216	2019-02-26	Good	#NULL!	1	#NULL!	#NULL!	#NULL!	#NULL!	1	#NULL!	#NULL!		1	2	2	2	2	1	1	1	2	1	1	1	1	2	1	2	2	4	3	2	2	2	2	2	2	1	4	#NULL!	#NULL!	#NULL!	#NULL!		2	2	2	2
2019-03-12 09:27:13	216	2019-03-12	Good	#NULL!	1	#NULL!	#NULL!	#NULL!	#NULL!	1	#NULL!	#NULL!		1	2	2	2	2	1	1	1	1	1	1	1	1	3	2	3	3	4	4	1	1	2	2	2	2	1	4	#NULL!	#NULL!	#NULL!	#NULL!		2	2	2	2
2019-03-21 12:18:06	216	2019-03-21	Good	#NULL!	1	#NULL!	#NULL!	#NULL!	#NULL!	1	#NULL!	#NULL!		0	#NULL!	#NULL!	#NULL!	#NULL!	#NULL!	#NULL!	#NULL!	#NULL!	#NULL!	#NULL!	#NULL!	#NULL!	#NULL!	#NULL!	#NULL!	#NULL!	#NULL!	#NULL!	#NULL!	#NULL!	#NULL!	#NULL!	#NULL!	#NULL!	1	4	#NULL!	#NULL!	#NULL!	#NULL!		2	2	2	2
2018-11-12 16:31:47	217	2018-11-12	alright	#NULL!	1	#NULL!	#NULL!	#NULL!	#NULL!	#NULL!	#NULL!	#NULL!		1	4	4	4	4	3	3	3	3	1	1	3	1	5	5	5	5	4	4	1	1	4	4	4	4	1	0	#NULL!	#NULL!	#NULL!	#NULL!		#NULL!	#NULL!	#NULL!	#NULL!
2018-11-29 16:01:53	217	2018-11-29	fine	#NULL!	1	#NULL!	#NULL!	#NULL!	#NULL!	#NULL!	#NULL!	#NULL!		0	#NULL!	#NULL!	#NULL!	#NULL!	#NULL!	#NULL!	#NULL!	#NULL!	#NULL!	#NULL!	#NULL!	#NULL!	#NULL!	#NULL!	#NULL!	#NULL!	#NULL!	#NULL!	#NULL!	#NULL!	#NULL!	#NULL!	#NULL!	#NULL!	1	0	#NULL!	#NULL!	#NULL!	#NULL!		#NULL!	#NULL!	#NULL!	#NULL!
2018-12-14 11:00:37	217	2018-12-14	ok	#NULL!	1	#NULL!	#NULL!	#NULL!	#NULL!	#NULL!	#NULL!	#NULL!		0	#NULL!	#NULL!	#NULL!	#NULL!	#NULL!	#NULL!	#NULL!	#NULL!	#NULL!	#NULL!	#NULL!	#NULL!	#NULL!	#NULL!	#NULL!	#NULL!	#NULL!	#NULL!	#NULL!	#NULL!	#NULL!	#NULL!	#NULL!	#NULL!	1	0	#NULL!	#NULL!	#NULL!	#NULL!		#NULL!	#NULL!	#NULL!	#NULL!
2018-12-19 09:39:18	217	2018-12-19	tired	#NULL!	1	#NULL!	#NULL!	#NULL!	#NULL!	#NULL!	#NULL!	#NULL!		0	#NULL!	#NULL!	#NULL!	#NULL!	#NULL!	#NULL!	#NULL!	#NULL!	#NULL!	#NULL!	#NULL!	#NULL!	#NULL!	#NULL!	#NULL!	#NULL!	#NULL!	#NULL!	#NULL!	#NULL!	#NULL!	#NULL!	#NULL!	#NULL!	1	0	#NULL!	#NULL!	#NULL!	#NULL!		#NULL!	#NULL!	#NULL!	#NULL!
2018-10-09 11:42:48	218	2018-10-09	good.	#NULL!	1	#NULL!	#NULL!	#NULL!	#NULL!	#NULL!	#NULL!	#NULL!		0	#NULL!	#NULL!	#NULL!	#NULL!	#NULL!	#NULL!	#NULL!	#NULL!	#NULL!	#NULL!	#NULL!	#NULL!	#NULL!	#NULL!	#NULL!	#NULL!	#NULL!	#NULL!	#NULL!	#NULL!	#NULL!	#NULL!	#NULL!	#NULL!	1	0	#NULL!	#NULL!	#NULL!	#NULL!		#NULL!	#NULL!	#NULL!	#NULL!
2018-10-17 11:33:56	218	2018-10-17	good, more tired	#NULL!	1	#NULL!	#NULL!	#NULL!	#NULL!	#NULL!	#NULL!	#NULL!		0	#NULL!	#NULL!	#NULL!	#NULL!	#NULL!	#NULL!	#NULL!	#NULL!	#NULL!	#NULL!	#NULL!	#NULL!	#NULL!	#NULL!	#NULL!	#NULL!	#NULL!	#NULL!	#NULL!	#NULL!	#NULL!	#NULL!	#NULL!	#NULL!	2	7	#NULL!	#NULL!	#NULL!	#NULL!		2	1	1	1
2019-01-18 12:13:10	219	2019-01-18	a little more nauseated. Might have had a kidney infection tested today and will see.	#NULL!	1	#NULL!	#NULL!	#NULL!	#NULL!	#NULL!	#NULL!	#NULL!		0	#NULL!	#NULL!	#NULL!	#NULL!	#NULL!	#NULL!	#NULL!	#NULL!	#NULL!	#NULL!	#NULL!	#NULL!	#NULL!	#NULL!	#NULL!	#NULL!	#NULL!	#NULL!	#NULL!	#NULL!	#NULL!	#NULL!	#NULL!	#NULL!	1	2	#NULL!	#NULL!	#NULL!	#NULL!		3	3	4	3
2019-04-08 11:15:24	219	2019-01-22	Good, tired more at work	#NULL!	1	#NULL!	#NULL!	#NULL!	#NULL!	#NULL!	#NULL!	#NULL!		1	3	3	3	3	1	1	2	2	1	2	1	2	3	3	4	4	3	1	2	2	3	3	3	3	1	4	#NULL!	#NULL!	#NULL!	#NULL!		3	3	3	3
2018-11-12 16:46:40	220	2018-11-12	Not too bad	#NULL!	1	#NULL!	1	#NULL!	#NULL!	#NULL!	#NULL!	#NULL!		0	#NULL!	#NULL!	#NULL!	#NULL!	#NULL!	#NULL!	#NULL!	#NULL!	#NULL!	#NULL!	#NULL!	#NULL!	#NULL!	#NULL!	#NULL!	#NULL!	#NULL!	#NULL!	#NULL!	#NULL!	#NULL!	#NULL!	#NULL!	#NULL!	1	4	#NULL!	#NULL!	#NULL!	#NULL!		1	1	1	1
2018-11-20 14:27:14	220	2018-11-20	nothing's changed, feeling ok.	#NULL!	1	#NULL!	1	#NULL!	#NULL!	#NULL!	#NULL!	#NULL!		0	#NULL!	#NULL!	#NULL!	#NULL!	#NULL!	#NULL!	#NULL!	#NULL!	#NULL!	#NULL!	#NULL!	#NULL!	#NULL!	#NULL!	#NULL!	#NULL!	#NULL!	#NULL!	#NULL!	#NULL!	#NULL!	#NULL!	#NULL!	#NULL!	1	4	#NULL!	#NULL!	#NULL!	#NULL!		1	1	1	1
2018-11-28 09:52:09	220	2018-11-28	tired	#NULL!	1	#NULL!	1	#NULL!	#NULL!	#NULL!	#NULL!	#NULL!		0	#NULL!	#NULL!	#NULL!	#NULL!	#NULL!	#NULL!	#NULL!	#NULL!	#NULL!	#NULL!	#NULL!	#NULL!	#NULL!	#NULL!	#NULL!	#NULL!	#NULL!	#NULL!	#NULL!	#NULL!	#NULL!	#NULL!	#NULL!	#NULL!	1	4	#NULL!	#NULL!	#NULL!	#NULL!		2	2	1	2
2018-12-11 14:06:47	220	2018-12-11	okay	#NULL!	1	#NULL!	#NULL!	#NULL!	#NULL!	#NULL!	#NULL!	#NULL!		0	#NULL!	#NULL!	#NULL!	#NULL!	#NULL!	#NULL!	#NULL!	#NULL!	#NULL!	#NULL!	#NULL!	#NULL!	#NULL!	#NULL!	#NULL!	#NULL!	#NULL!	#NULL!	#NULL!	#NULL!	#NULL!	#NULL!	#NULL!	#NULL!	1	6	#NULL!	#NULL!	#NULL!	#NULL!		3	2	1	2
2018-10-15 17:02:38	221	2018-10-15	Ok	#NULL!	1	#NULL!	#NULL!	#NULL!	#NULL!	#NULL!	#NULL!	#NULL!		0	#NULL!	#NULL!	#NULL!	#NULL!	#NULL!	#NULL!	#NULL!	#NULL!	#NULL!	#NULL!	#NULL!	#NULL!	#NULL!	#NULL!	#NULL!	#NULL!	#NULL!	#NULL!	#NULL!	#NULL!	#NULL!	#NULL!	#NULL!	#NULL!	1	0	#NULL!	#NULL!	#NULL!	#NULL!		#NULL!	#NULL!	#NULL!	#NULL!
2018-10-23 16:59:45	221	2018-10-23	Ok	#NULL!	1	#NULL!	#NULL!	#NULL!	#NULL!	#NULL!	#NULL!	#NULL!		0	#NULL!	#NULL!	#NULL!	#NULL!	#NULL!	#NULL!	#NULL!	#NULL!	#NULL!	#NULL!	#NULL!	#NULL!	#NULL!	#NULL!	#NULL!	#NULL!	#NULL!	#NULL!	#NULL!	#NULL!	#NULL!	#NULL!	#NULL!	#NULL!	1	0	#NULL!	#NULL!	#NULL!	#NULL!		#NULL!	#NULL!	#NULL!	#NULL!
2018-11-07 19:52:16	221	2018-11-07	Fair	#NULL!	1	#NULL!	#NULL!	#NULL!	#NULL!	#NULL!	#NULL!	#NULL!		1	2	2	1	2	4	4	4	3	3	3	4	3	2	2	2	2	3	2	2	2	3	2	2	2	1	1	#NULL!	#NULL!	#NULL!	#NULL!		2	2	1	2
2018-10-08 08:49:32	222	2018-10-08	Very well.	#NULL!	1	#NULL!	#NULL!	#NULL!	#NULL!	#NULL!	#NULL!	#NULL!		0	#NULL!	#NULL!	#NULL!	#NULL!	#NULL!	#NULL!	#NULL!	#NULL!	#NULL!	#NULL!	#NULL!	#NULL!	#NULL!	#NULL!	#NULL!	#NULL!	#NULL!	#NULL!	#NULL!	#NULL!	#NULL!	#NULL!	#NULL!	#NULL!	1	0	#NULL!	#NULL!	#NULL!	#NULL!		#NULL!	#NULL!	#NULL!	#NULL!
2018-10-15 19:50:26	222	2018-10-15	Very well.	#NULL!	1	#NULL!	#NULL!	#NULL!	#NULL!	#NULL!	#NULL!	#NULL!		0	#NULL!	#NULL!	#NULL!	#NULL!	#NULL!	#NULL!	#NULL!	#NULL!	#NULL!	#NULL!	#NULL!	#NULL!	#NULL!	#NULL!	#NULL!	#NULL!	#NULL!	#NULL!	#NULL!	#NULL!	#NULL!	#NULL!	#NULL!	#NULL!	1	0	#NULL!	#NULL!	#NULL!	#NULL!		#NULL!	#NULL!	#NULL!	#NULL!
2018-10-26 18:44:12	222	2018-10-26	Good, but a little fatigued	#NULL!	1	#NULL!	#NULL!	#NULL!	#NULL!	#NULL!	#NULL!	#NULL!		0	#NULL!	#NULL!	#NULL!	#NULL!	#NULL!	#NULL!	#NULL!	#NULL!	#NULL!	#NULL!	#NULL!	#NULL!	#NULL!	#NULL!	#NULL!	#NULL!	#NULL!	#NULL!	#NULL!	#NULL!	#NULL!	#NULL!	#NULL!	#NULL!	1	0	#NULL!	#NULL!	#NULL!	#NULL!		#NULL!	#NULL!	#NULL!	#NULL!
2018-10-25 15:37:00	223	2018-10-25	OKAY. radiation this week	#NULL!	1	#NULL!	#NULL!	#NULL!	#NULL!	#NULL!	#NULL!	#NULL!		0	#NULL!	#NULL!	#NULL!	#NULL!	#NULL!	#NULL!	#NULL!	#NULL!	#NULL!	#NULL!	#NULL!	#NULL!	#NULL!	#NULL!	#NULL!	#NULL!	#NULL!	#NULL!	#NULL!	#NULL!	#NULL!	#NULL!	#NULL!	#NULL!	2	7	#NULL!	#NULL!	#NULL!	#NULL!		4	3	3	3
2018-11-05 13:53:33	223	2018-11-05	not crazy -bad but tired out by radiation radiation and rash	#NULL!	1	#NULL!	#NULL!	#NULL!	#NULL!	#NULL!	#NULL!	#NULL!		1	3	3	2	2	1	1	1	1	1	1	1	1	3	3	3	3	2	3	3	3	3	3	3	3	2	8	#NULL!	#NULL!	#NULL!	#NULL!		3	3	3	3
2018-11-15 15:35:46	224	2018-11-15	okay. tired.	#NULL!	1	#NULL!	#NULL!	#NULL!	#NULL!	#NULL!	#NULL!	#NULL!		0	#NULL!	#NULL!	#NULL!	#NULL!	#NULL!	#NULL!	#NULL!	#NULL!	#NULL!	#NULL!	#NULL!	#NULL!	#NULL!	#NULL!	#NULL!	#NULL!	#NULL!	#NULL!	#NULL!	#NULL!	#NULL!	#NULL!	#NULL!	#NULL!	1	3	#NULL!	#NULL!	#NULL!	#NULL!		1	2	1	2
2018-11-20 14:44:20	224	2018-11-20	not real good. tired. nauseated	#NULL!	1	#NULL!	#NULL!	#NULL!	#NULL!	#NULL!	#NULL!	#NULL!		1	3	3	5	3	1	1	1	3	1	2	1	1	4	4	5	5	2	1	5	2	2	2	4	1	1	2	#NULL!	#NULL!	#NULL!	#NULL!		2	2	1	2
2018-11-26 15:59:45	224	2018-11-26	tired, but overall, OK	#NULL!	1	#NULL!	#NULL!	#NULL!	#NULL!	#NULL!	#NULL!	#NULL!		0	#NULL!	#NULL!	#NULL!	#NULL!	#NULL!	#NULL!	#NULL!	#NULL!	#NULL!	#NULL!	#NULL!	#NULL!	#NULL!	#NULL!	#NULL!	#NULL!	#NULL!	#NULL!	#NULL!	#NULL!	#NULL!	#NULL!	#NULL!	#NULL!	1	3	#NULL!	#NULL!	#NULL!	#NULL!		1	1	1	1
2018-11-30 12:20:28	226	#NULL!	Good	#NULL!	1	#NULL!	#NULL!	#NULL!	#NULL!	#NULL!	#NULL!	#NULL!		0	#NULL!	#NULL!	#NULL!	#NULL!	#NULL!	#NULL!	#NULL!	#NULL!	#NULL!	#NULL!	#NULL!	#NULL!	#NULL!	#NULL!	#NULL!	#NULL!	#NULL!	#NULL!	#NULL!	#NULL!	#NULL!	#NULL!	#NULL!	#NULL!	1	2	#NULL!	#NULL!	#NULL!	#NULL!		2	2	2	2
2018-12-14 15:36:31	226	#NULL!	Good	#NULL!	1	#NULL!	#NULL!	#NULL!	#NULL!	#NULL!	#NULL!	#NULL!		0	#NULL!	#NULL!	#NULL!	#NULL!	#NULL!	#NULL!	#NULL!	#NULL!	#NULL!	#NULL!	#NULL!	#NULL!	#NULL!	#NULL!	#NULL!	#NULL!	#NULL!	#NULL!	#NULL!	#NULL!	#NULL!	#NULL!	#NULL!	#NULL!	1	2	#NULL!	#NULL!	#NULL!	#NULL!		2	2	2	2
2018-12-24 21:53:16	226	#NULL!	Good	#NULL!	1	#NULL!	#NULL!	#NULL!	#NULL!	#NULL!	#NULL!	#NULL!		0	#NULL!	#NULL!	#NULL!	#NULL!	#NULL!	#NULL!	#NULL!	#NULL!	#NULL!	#NULL!	#NULL!	#NULL!	#NULL!	#NULL!	#NULL!	#NULL!	#NULL!	#NULL!	#NULL!	#NULL!	#NULL!	#NULL!	#NULL!	#NULL!	1	1	#NULL!	#NULL!	#NULL!	#NULL!		2	2	2	2
2019-01-26 12:34:50	227	2019-01-26	Ok	#NULL!	1	#NULL!	#NULL!	#NULL!	#NULL!	#NULL!	#NULL!	#NULL!		1	3	3	3	3	1	2	2	2	1	2	1	1	3	2	2	2	3	3	2	2	3	3	3	3	2	7	#NULL!	#NULL!	#NULL!	#NULL!		3	3	3	3
2019-01-30 19:53:44	227	2019-01-30	Ok	#NULL!	1	#NULL!	#NULL!	#NULL!	#NULL!	#NULL!	#NULL!	#NULL!		1	3	3	4	3	1	2	2	2	1	2	1	1	4	4	4	4	3	2	2	2	3	3	3	3	2	7	#NULL!	#NULL!	#NULL!	#NULL!		3	3	3	3
2019-02-11 12:49:38	227	2019-02-11	Ok	#NULL!	1	#NULL!	#NULL!	#NULL!	#NULL!	#NULL!	#NULL!	#NULL!		1	4	4	4	4	1	2	2	1	1	2	1	1	4	4	4	4	3	2	2	2	3	3	3	3	2	8	#NULL!	#NULL!	#NULL!	#NULL!		4	4	4	4
2019-04-16 18:33:07	228	#NULL!	Good	#NULL!	1	#NULL!	#NULL!	#NULL!	#NULL!	#NULL!	#NULL!	1	Radiation to start next week or so	0	#NULL!	#NULL!	#NULL!	#NULL!	#NULL!	#NULL!	#NULL!	#NULL!	#NULL!	#NULL!	#NULL!	#NULL!	#NULL!	#NULL!	#NULL!	#NULL!	#NULL!	#NULL!	#NULL!	#NULL!	#NULL!	#NULL!	#NULL!	#NULL!	1	0	#NULL!	#NULL!	#NULL!	#NULL!		#NULL!	#NULL!	#NULL!	#NULL!
2019-05-15 12:01:49	228	#NULL!	Good	#NULL!	1	#NULL!	#NULL!	#NULL!	#NULL!	#NULL!	#NULL!	#NULL!		0	#NULL!	#NULL!	#NULL!	#NULL!	#NULL!	#NULL!	#NULL!	#NULL!	#NULL!	#NULL!	#NULL!	#NULL!	#NULL!	#NULL!	#NULL!	#NULL!	#NULL!	#NULL!	#NULL!	#NULL!	#NULL!	#NULL!	#NULL!	#NULL!	1	1	#NULL!	#NULL!	#NULL!	#NULL!		1	1	1	1
2019-06-19 12:21:59	228	2019-06-12	Fatigued	#NULL!	1	#NULL!	#NULL!	#NULL!	#NULL!	#NULL!	#NULL!	#NULL!		0	#NULL!	#NULL!	#NULL!	#NULL!	#NULL!	#NULL!	#NULL!	#NULL!	#NULL!	#NULL!	#NULL!	#NULL!	#NULL!	#NULL!	#NULL!	#NULL!	#NULL!	#NULL!	#NULL!	#NULL!	#NULL!	#NULL!	#NULL!	#NULL!	1	3	#NULL!	#NULL!	#NULL!	#NULL!		2	2	2	2
2019-06-14 10:30:25	231	2019-06-14	good, just tired	#NULL!	1	#NULL!	#NULL!	#NULL!	#NULL!	#NULL!	#NULL!	#NULL!		1	5	3	3	3	3	3	3	3	1	1	4	1	5	5	5	5	3	3	3	3	5	5	5	5	1	5	#NULL!	#NULL!	#NULL!	#NULL!		1	1	1	1
2019-06-21 16:57:35	231	2019-06-21	pretty good	#NULL!	1	#NULL!	#NULL!	#NULL!	#NULL!	#NULL!	#NULL!	#NULL!		0	#NULL!	#NULL!	#NULL!	#NULL!	#NULL!	#NULL!	#NULL!	#NULL!	#NULL!	#NULL!	#NULL!	#NULL!	#NULL!	#NULL!	#NULL!	#NULL!	#NULL!	#NULL!	#NULL!	#NULL!	#NULL!	#NULL!	#NULL!	#NULL!	1	6	#NULL!	#NULL!	#NULL!	#NULL!		1	1	1	1
2018-11-12 13:59:00	234	2018-11-12	Good	#NULL!	1	#NULL!	#NULL!	#NULL!	#NULL!	#NULL!	#NULL!	#NULL!		0	#NULL!	#NULL!	#NULL!	#NULL!	#NULL!	#NULL!	#NULL!	#NULL!	#NULL!	#NULL!	#NULL!	#NULL!	#NULL!	#NULL!	#NULL!	#NULL!	#NULL!	#NULL!	#NULL!	#NULL!	#NULL!	#NULL!	#NULL!	#NULL!	1	3	#NULL!	#NULL!	#NULL!	#NULL!		2	2	1	2
2018-11-26 15:13:15	235	2018-11-26	pretty good	#NULL!	1	#NULL!	#NULL!	#NULL!	#NULL!	#NULL!	#NULL!	#NULL!		1	1	1	1	1	3	3	3	3	1	3	3	1	2	2	2	2	2	2	2	2	1	1	1	1	1	4	#NULL!	#NULL!	#NULL!	#NULL!		1	1	1	1
2019-06-17 15:41:59	235	2019-06-17	headaches	#NULL!	1	#NULL!	#NULL!	#NULL!	#NULL!	#NULL!	#NULL!	#NULL!		0	#NULL!	#NULL!	#NULL!	#NULL!	#NULL!	#NULL!	#NULL!	#NULL!	#NULL!	#NULL!	#NULL!	#NULL!	#NULL!	#NULL!	#NULL!	#NULL!	#NULL!	#NULL!	#NULL!	#NULL!	#NULL!	#NULL!	#NULL!	#NULL!	1	5	#NULL!	#NULL!	#NULL!	#NULL!		1	1	1	1
2019-06-24 09:52:24	235	2019-06-24	TIRED. RESP ISSUE	#NULL!	1	#NULL!	#NULL!	#NULL!	#NULL!	#NULL!	#NULL!	#NULL!		0	#NULL!	#NULL!	#NULL!	#NULL!	#NULL!	#NULL!	#NULL!	#NULL!	#NULL!	#NULL!	#NULL!	#NULL!	#NULL!	#NULL!	#NULL!	#NULL!	#NULL!	#NULL!	#NULL!	#NULL!	#NULL!	#NULL!	#NULL!	#NULL!	1	0	#NULL!	#NULL!	#NULL!	#NULL!		#NULL!	#NULL!	#NULL!	#NULL!
2019-07-15 11:23:05	235	2019-07-15	tired, but okay	#NULL!	1	#NULL!	#NULL!	#NULL!	#NULL!	#NULL!	#NULL!	#NULL!		0	#NULL!	#NULL!	#NULL!	#NULL!	#NULL!	#NULL!	#NULL!	#NULL!	#NULL!	#NULL!	#NULL!	#NULL!	#NULL!	#NULL!	#NULL!	#NULL!	#NULL!	#NULL!	#NULL!	#NULL!	#NULL!	#NULL!	#NULL!	#NULL!	1	3	#NULL!	#NULL!	#NULL!	#NULL!		2	2	2	2
2018-11-19 22:13:23	238	2018-11-19	Good	#NULL!	1	#NULL!	#NULL!	#NULL!	#NULL!	#NULL!	#NULL!	#NULL!		0	#NULL!	#NULL!	#NULL!	#NULL!	#NULL!	#NULL!	#NULL!	#NULL!	#NULL!	#NULL!	#NULL!	#NULL!	#NULL!	#NULL!	#NULL!	#NULL!	#NULL!	#NULL!	#NULL!	#NULL!	#NULL!	#NULL!	#NULL!	#NULL!	1	0	#NULL!	#NULL!	#NULL!	#NULL!		#NULL!	#NULL!	#NULL!	#NULL!
2018-11-26 23:14:29	238	2018-11-26	Goid	#NULL!	1	#NULL!	#NULL!	#NULL!	#NULL!	#NULL!	#NULL!	#NULL!		0	#NULL!	#NULL!	#NULL!	#NULL!	#NULL!	#NULL!	#NULL!	#NULL!	#NULL!	#NULL!	#NULL!	#NULL!	#NULL!	#NULL!	#NULL!	#NULL!	#NULL!	#NULL!	#NULL!	#NULL!	#NULL!	#NULL!	#NULL!	#NULL!	1	0	#NULL!	#NULL!	#NULL!	#NULL!		#NULL!	#NULL!	#NULL!	#NULL!
2018-12-10 19:15:41	238	2018-12-10	Good	#NULL!	1	#NULL!	#NULL!	#NULL!	#NULL!	#NULL!	#NULL!	#NULL!		0	#NULL!	#NULL!	#NULL!	#NULL!	#NULL!	#NULL!	#NULL!	#NULL!	#NULL!	#NULL!	#NULL!	#NULL!	#NULL!	#NULL!	#NULL!	#NULL!	#NULL!	#NULL!	#NULL!	#NULL!	#NULL!	#NULL!	#NULL!	#NULL!	1	0	#NULL!	#NULL!	#NULL!	#NULL!		#NULL!	#NULL!	#NULL!	#NULL!
2018-12-17 12:16:51	238	2018-12-17	Good	#NULL!	1	#NULL!	#NULL!	#NULL!	#NULL!	#NULL!	#NULL!	#NULL!		0	#NULL!	#NULL!	#NULL!	#NULL!	#NULL!	#NULL!	#NULL!	#NULL!	#NULL!	#NULL!	#NULL!	#NULL!	#NULL!	#NULL!	#NULL!	#NULL!	#NULL!	#NULL!	#NULL!	#NULL!	#NULL!	#NULL!	#NULL!	#NULL!	1	1	#NULL!	#NULL!	#NULL!	#NULL!		1	1	1	1
2019-01-07 17:04:03	238	2019-01-07	Uncomfortable	#NULL!	1	#NULL!	1	#NULL!	#NULL!	#NULL!	#NULL!	#NULL!		0	#NULL!	#NULL!	#NULL!	#NULL!	#NULL!	#NULL!	#NULL!	#NULL!	#NULL!	#NULL!	#NULL!	#NULL!	#NULL!	#NULL!	#NULL!	#NULL!	#NULL!	#NULL!	#NULL!	#NULL!	#NULL!	#NULL!	#NULL!	#NULL!	1	5	#NULL!	#NULL!	#NULL!	#NULL!		2	3	3	2
2018-11-26 11:23:08	239	2018-11-26	Good	#NULL!	1	#NULL!	#NULL!	#NULL!	#NULL!	#NULL!	#NULL!	#NULL!		0	#NULL!	#NULL!	#NULL!	#NULL!	#NULL!	#NULL!	#NULL!	#NULL!	#NULL!	#NULL!	#NULL!	#NULL!	#NULL!	#NULL!	#NULL!	#NULL!	#NULL!	#NULL!	#NULL!	#NULL!	#NULL!	#NULL!	#NULL!	#NULL!	1	0	#NULL!	#NULL!	#NULL!	#NULL!		#NULL!	#NULL!	#NULL!	#NULL!
2018-12-10 16:20:27	239	2018-12-10	tired; had menstrual cramps all week also	#NULL!	1	#NULL!	#NULL!	#NULL!	#NULL!	#NULL!	#NULL!	#NULL!		1	2	1	1	2	2	1	1	2	1	1	1	1	4	2	4	4	4	4	1	1	2	2	2	2	1	3	#NULL!	#NULL!	#NULL!	#NULL!		2	2	1	2
2018-12-18 14:32:17	239	2018-12-18	very tired; itchy from radiation	#NULL!	1	#NULL!	#NULL!	#NULL!	#NULL!	#NULL!	#NULL!	#NULL!		1	3	1	1	2	2	1	1	2	1	1	2	1	4	2	4	4	4	3	3	2	2	2	3	2	1	3	#NULL!	#NULL!	#NULL!	#NULL!		2	2	2	2
2019-01-18 13:24:40	241	2019-01-18	good	#NULL!	1	#NULL!	#NULL!	#NULL!	#NULL!	#NULL!	#NULL!	#NULL!		0	#NULL!	#NULL!	#NULL!	#NULL!	#NULL!	#NULL!	#NULL!	#NULL!	#NULL!	#NULL!	#NULL!	#NULL!	#NULL!	#NULL!	#NULL!	#NULL!	#NULL!	#NULL!	#NULL!	#NULL!	#NULL!	#NULL!	#NULL!	#NULL!	1	3	#NULL!	#NULL!	#NULL!	#NULL!		2	2	1	2
2019-01-22 11:57:18	241	2019-01-22	pretty good	#NULL!	1	#NULL!	#NULL!	#NULL!	#NULL!	#NULL!	#NULL!	#NULL!		0	#NULL!	#NULL!	#NULL!	#NULL!	#NULL!	#NULL!	#NULL!	#NULL!	#NULL!	#NULL!	#NULL!	#NULL!	#NULL!	#NULL!	#NULL!	#NULL!	#NULL!	#NULL!	#NULL!	#NULL!	#NULL!	#NULL!	#NULL!	#NULL!	1	4	#NULL!	#NULL!	#NULL!	#NULL!		1	1	1	1
2019-02-11 14:38:18	241	2019-02-04	good	#NULL!	1	#NULL!	#NULL!	#NULL!	#NULL!	#NULL!	#NULL!	#NULL!		1	3	2	2	2	1	1	1	1	1	1	1	1	1	1	2	2	2	2	2	2	#NULL!	#NULL!	#NULL!	#NULL!	#NULL!	#NULL!	#NULL!	#NULL!	#NULL!	#NULL!		#NULL!	#NULL!	#NULL!	#NULL!
2019-01-25 14:37:52	244	2019-01-25	very tired	#NULL!	1	#NULL!	#NULL!	#NULL!	#NULL!	#NULL!	#NULL!	#NULL!		1	1	1	1	1	2	2	3	2	2	2	3	2	5	5	5	5	3	3	1	1	2	2	2	2	1	6	#NULL!	#NULL!	#NULL!	#NULL!		1	1	1	1
2018-12-12 22:38:55	245	2018-12-12	tired and lethargic	#NULL!	1	#NULL!	#NULL!	#NULL!	#NULL!	#NULL!	#NULL!	#NULL!		1	3	2	2	2	3	2	2	3	1	1	3	1	4	3	4	4	3	3	3	3	3	4	3	4	1	5	#NULL!	#NULL!	#NULL!	#NULL!		3	3	2	2
2018-12-17 18:03:41	245	2018-12-17	fine	#NULL!	1	#NULL!	#NULL!	#NULL!	#NULL!	#NULL!	#NULL!	#NULL!		0	#NULL!	#NULL!	#NULL!	#NULL!	#NULL!	#NULL!	#NULL!	#NULL!	#NULL!	#NULL!	#NULL!	#NULL!	#NULL!	#NULL!	#NULL!	#NULL!	#NULL!	#NULL!	#NULL!	#NULL!	#NULL!	#NULL!	#NULL!	#NULL!	1	2	#NULL!	#NULL!	#NULL!	#NULL!		2	1	1	1
2018-12-12 10:37:22	247	2018-12-12	so far, OK, tired	#NULL!	1	#NULL!	#NULL!	#NULL!	#NULL!	#NULL!	#NULL!	#NULL!		0	#NULL!	#NULL!	#NULL!	#NULL!	#NULL!	#NULL!	#NULL!	#NULL!	#NULL!	#NULL!	#NULL!	#NULL!	#NULL!	#NULL!	#NULL!	#NULL!	#NULL!	#NULL!	#NULL!	#NULL!	#NULL!	#NULL!	#NULL!	#NULL!	1	0	#NULL!	#NULL!	#NULL!	#NULL!		#NULL!	#NULL!	#NULL!	#NULL!
2018-12-17 12:52:27	248	2018-12-17	Good	#NULL!	1	#NULL!	#NULL!	#NULL!	#NULL!	#NULL!	#NULL!	#NULL!		1	5	1	1	1	2	1	1	1	1	1	1	1	2	2	2	2	3	4	2	1	1	3	3	1	1	1	#NULL!	#NULL!	#NULL!	#NULL!		2	2	1	2
2019-01-08 11:38:32	248	2019-01-08	Tired	#NULL!	1	#NULL!	#NULL!	#NULL!	#NULL!	#NULL!	#NULL!	#NULL!		1	5	1	1	2	3	1	1	2	1	1	1	1	4	2	3	3	3	4	2	1	3	2	3	3	1	5	#NULL!	#NULL!	#NULL!	#NULL!		2	3	2	3
2019-01-14 13:43:46	248	2019-01-14	Tired	#NULL!	1	#NULL!	#NULL!	#NULL!	#NULL!	#NULL!	#NULL!	#NULL!		1	5	1	1	1	1	2	1	2	1	1	1	1	3	2	3	3	3	4	3	1	3	2	3	3	1	3	#NULL!	#NULL!	#NULL!	#NULL!		2	3	2	3
2019-01-23 20:57:04	250	2019-01-23	Well	#NULL!	1	#NULL!	#NULL!	#NULL!	#NULL!	#NULL!	#NULL!	#NULL!		0	#NULL!	#NULL!	#NULL!	#NULL!	#NULL!	#NULL!	#NULL!	#NULL!	#NULL!	#NULL!	#NULL!	#NULL!	#NULL!	#NULL!	#NULL!	#NULL!	#NULL!	#NULL!	#NULL!	#NULL!	#NULL!	#NULL!	#NULL!	#NULL!	1	0	#NULL!	#NULL!	#NULL!	#NULL!		#NULL!	#NULL!	#NULL!	#NULL!
2019-01-30 12:34:35	250	2019-01-30	A little tired.	#NULL!	1	#NULL!	#NULL!	#NULL!	#NULL!	#NULL!	#NULL!	#NULL!		0	#NULL!	#NULL!	#NULL!	#NULL!	#NULL!	#NULL!	#NULL!	#NULL!	#NULL!	#NULL!	#NULL!	#NULL!	#NULL!	#NULL!	#NULL!	#NULL!	#NULL!	#NULL!	#NULL!	#NULL!	#NULL!	#NULL!	#NULL!	#NULL!	1	0	#NULL!	#NULL!	#NULL!	#NULL!		#NULL!	#NULL!	#NULL!	#NULL!
2019-02-12 13:05:12	250	2019-02-12	Somewhat tired.	#NULL!	1	#NULL!	#NULL!	#NULL!	#NULL!	#NULL!	#NULL!	#NULL!		0	#NULL!	#NULL!	#NULL!	#NULL!	#NULL!	#NULL!	#NULL!	#NULL!	#NULL!	#NULL!	#NULL!	#NULL!	#NULL!	#NULL!	#NULL!	#NULL!	#NULL!	#NULL!	#NULL!	#NULL!	#NULL!	#NULL!	#NULL!	#NULL!	1	0	#NULL!	#NULL!	#NULL!	#NULL!		#NULL!	#NULL!	#NULL!	#NULL!
2018-11-19 10:48:35	251	2018-11-19	not bad	#NULL!	1	#NULL!	#NULL!	#NULL!	#NULL!	#NULL!	#NULL!	#NULL!		0	#NULL!	#NULL!	#NULL!	#NULL!	#NULL!	#NULL!	#NULL!	#NULL!	#NULL!	#NULL!	#NULL!	#NULL!	#NULL!	#NULL!	#NULL!	#NULL!	#NULL!	#NULL!	#NULL!	#NULL!	#NULL!	#NULL!	#NULL!	#NULL!	1	3	#NULL!	#NULL!	#NULL!	#NULL!		1	1	1	1
2018-12-14 21:15:16	251	2018-12-14	Pretty good	#NULL!	1	#NULL!	#NULL!	#NULL!	#NULL!	#NULL!	#NULL!	#NULL!		1	1	1	1	1	1	1	1	2	1	1	1	1	1	1	1	1	4	4	2	1	1	1	2	1	1	1	#NULL!	#NULL!	#NULL!	#NULL!		1	1	1	1
2018-12-17 15:15:30	251	2018-12-17	Good	#NULL!	1	#NULL!	#NULL!	#NULL!	#NULL!	#NULL!	#NULL!	#NULL!		0	#NULL!	#NULL!	#NULL!	#NULL!	#NULL!	#NULL!	#NULL!	#NULL!	#NULL!	#NULL!	#NULL!	#NULL!	#NULL!	#NULL!	#NULL!	#NULL!	#NULL!	#NULL!	#NULL!	#NULL!	#NULL!	#NULL!	#NULL!	#NULL!	1	2	#NULL!	#NULL!	#NULL!	#NULL!		1	1	1	1
2019-01-11 15:19:54	251	2019-01-11	good	#NULL!	1	#NULL!	#NULL!	#NULL!	#NULL!	#NULL!	#NULL!	#NULL!		1	2	1	1	2	1	1	1	2	1	2	1	1	3	3	2	3	4	4	2	1	2	3	3	2	1	2	#NULL!	#NULL!	#NULL!	#NULL!		1	1	1	2
2018-11-26 14:56:57	253	2018-11-26	arthritis, legs hurt terribly	#NULL!	1	#NULL!	#NULL!	#NULL!	#NULL!	#NULL!	#NULL!	#NULL!		0	#NULL!	#NULL!	#NULL!	#NULL!	#NULL!	#NULL!	#NULL!	#NULL!	#NULL!	#NULL!	#NULL!	#NULL!	#NULL!	#NULL!	#NULL!	#NULL!	#NULL!	#NULL!	#NULL!	#NULL!	#NULL!	#NULL!	#NULL!	#NULL!	2	7	#NULL!	#NULL!	#NULL!	#NULL!		5	5	5	5
2019-01-22 12:12:10	253	2019-01-22	ok	#NULL!	1	#NULL!	1	#NULL!	#NULL!	#NULL!	#NULL!	#NULL!		0	#NULL!	#NULL!	#NULL!	#NULL!	#NULL!	#NULL!	#NULL!	#NULL!	#NULL!	#NULL!	#NULL!	#NULL!	#NULL!	#NULL!	#NULL!	#NULL!	#NULL!	#NULL!	#NULL!	#NULL!	#NULL!	#NULL!	#NULL!	#NULL!	1	5	#NULL!	#NULL!	#NULL!	#NULL!		3	3	3	3
2019-01-16 10:28:06	255	2019-01-16	fine	#NULL!	1	#NULL!	#NULL!	#NULL!	#NULL!	#NULL!	#NULL!	#NULL!		0	#NULL!	#NULL!	#NULL!	#NULL!	#NULL!	#NULL!	#NULL!	#NULL!	#NULL!	#NULL!	#NULL!	#NULL!	#NULL!	#NULL!	#NULL!	#NULL!	#NULL!	#NULL!	#NULL!	#NULL!	#NULL!	#NULL!	#NULL!	#NULL!	1	0	#NULL!	#NULL!	#NULL!	#NULL!		#NULL!	#NULL!	#NULL!	#NULL!
2019-01-22 12:28:57	255	2019-01-22	OK, a little tired	#NULL!	1	#NULL!	#NULL!	#NULL!	#NULL!	#NULL!	#NULL!	#NULL!		0	#NULL!	#NULL!	#NULL!	#NULL!	#NULL!	#NULL!	#NULL!	#NULL!	#NULL!	#NULL!	#NULL!	#NULL!	#NULL!	#NULL!	#NULL!	#NULL!	#NULL!	#NULL!	#NULL!	#NULL!	#NULL!	#NULL!	#NULL!	#NULL!	1	0	#NULL!	#NULL!	#NULL!	#NULL!		#NULL!	#NULL!	#NULL!	#NULL!
2019-01-29 12:06:18	255	2019-01-29	"status quo"	#NULL!	1	#NULL!	#NULL!	#NULL!	#NULL!	#NULL!	#NULL!	#NULL!		0	#NULL!	#NULL!	#NULL!	#NULL!	#NULL!	#NULL!	#NULL!	#NULL!	#NULL!	#NULL!	#NULL!	#NULL!	#NULL!	#NULL!	#NULL!	#NULL!	#NULL!	#NULL!	#NULL!	#NULL!	#NULL!	#NULL!	#NULL!	#NULL!	1	0	#NULL!	#NULL!	#NULL!	#NULL!		#NULL!	#NULL!	#NULL!	#NULL!
2019-02-12 10:56:37	255	2019-02-12	good	#NULL!	1	#NULL!	#NULL!	#NULL!	#NULL!	#NULL!	#NULL!	#NULL!		0	#NULL!	#NULL!	#NULL!	#NULL!	#NULL!	#NULL!	#NULL!	#NULL!	#NULL!	#NULL!	#NULL!	#NULL!	#NULL!	#NULL!	#NULL!	#NULL!	#NULL!	#NULL!	#NULL!	#NULL!	#NULL!	#NULL!	#NULL!	#NULL!	1	0	#NULL!	#NULL!	#NULL!	#NULL!		#NULL!	#NULL!	#NULL!	#NULL!
2018-12-14 11:22:23	256	2018-12-14	well	#NULL!	1	#NULL!	#NULL!	#NULL!	#NULL!	#NULL!	#NULL!	#NULL!		0	#NULL!	#NULL!	#NULL!	#NULL!	#NULL!	#NULL!	#NULL!	#NULL!	#NULL!	#NULL!	#NULL!	#NULL!	#NULL!	#NULL!	#NULL!	#NULL!	#NULL!	#NULL!	#NULL!	#NULL!	#NULL!	#NULL!	#NULL!	#NULL!	1	0	#NULL!	#NULL!	#NULL!	#NULL!		#NULL!	#NULL!	#NULL!	#NULL!
2019-01-16 10:35:11	256	2019-01-16	OK, itchy and red nipple on irradiated breast	#NULL!	1	#NULL!	#NULL!	#NULL!	#NULL!	#NULL!	#NULL!	#NULL!		0	#NULL!	#NULL!	#NULL!	#NULL!	#NULL!	#NULL!	#NULL!	#NULL!	#NULL!	#NULL!	#NULL!	#NULL!	#NULL!	#NULL!	#NULL!	#NULL!	#NULL!	#NULL!	#NULL!	#NULL!	#NULL!	#NULL!	#NULL!	#NULL!	1	0	#NULL!	#NULL!	#NULL!	#NULL!		#NULL!	#NULL!	#NULL!	#NULL!
2019-01-22 12:34:18	256	2019-01-22	"just fine"	#NULL!	1	#NULL!	#NULL!	#NULL!	#NULL!	#NULL!	#NULL!	#NULL!		0	#NULL!	#NULL!	#NULL!	#NULL!	#NULL!	#NULL!	#NULL!	#NULL!	#NULL!	#NULL!	#NULL!	#NULL!	#NULL!	#NULL!	#NULL!	#NULL!	#NULL!	#NULL!	#NULL!	#NULL!	#NULL!	#NULL!	#NULL!	#NULL!	1	0	#NULL!	#NULL!	#NULL!	#NULL!		#NULL!	#NULL!	#NULL!	#NULL!
2019-02-01 10:29:40	256	2019-02-01	pretty tired	#NULL!	1	#NULL!	#NULL!	#NULL!	#NULL!	#NULL!	#NULL!	#NULL!		1	1	1	1	1	1	1	1	1	1	1	1	1	4	4	4	4	5	3	1	1	4	4	3	4	1	0	#NULL!	#NULL!	#NULL!	#NULL!		#NULL!	#NULL!	#NULL!	#NULL!
2019-02-19 08:05:02	259	2019-02-19	Great	#NULL!	1	#NULL!	#NULL!	#NULL!	#NULL!	#NULL!	#NULL!	#NULL!		1	1	1	1	1	1	2	2	2	1	1	2	1	1	1	1	1	5	4	2	1	1	1	1	1	1	0	#NULL!	#NULL!	#NULL!	#NULL!		#NULL!	#NULL!	#NULL!	#NULL!
2019-02-19 09:15:57	259	2019-02-15	Great	#NULL!	1	#NULL!	#NULL!	#NULL!	#NULL!	#NULL!	#NULL!	#NULL!		0	#NULL!	#NULL!	#NULL!	#NULL!	#NULL!	#NULL!	#NULL!	#NULL!	#NULL!	#NULL!	#NULL!	#NULL!	#NULL!	#NULL!	#NULL!	#NULL!	#NULL!	#NULL!	#NULL!	#NULL!	#NULL!	#NULL!	#NULL!	#NULL!	1	0	#NULL!	#NULL!	#NULL!	#NULL!		#NULL!	#NULL!	#NULL!	#NULL!
2019-01-18 14:04:16	260	2019-01-18	Great, havent started treatment yet. Endo predict says no chemotherapy but radiation starting end of next week. Recieving at end of next week at Washington.	#NULL!	1	#NULL!	#NULL!	#NULL!	#NULL!	#NULL!	#NULL!	#NULL!		0	#NULL!	#NULL!	#NULL!	#NULL!	#NULL!	#NULL!	#NULL!	#NULL!	#NULL!	#NULL!	#NULL!	#NULL!	#NULL!	#NULL!	#NULL!	#NULL!	#NULL!	#NULL!	#NULL!	#NULL!	#NULL!	#NULL!	#NULL!	#NULL!	1	0	#NULL!	#NULL!	#NULL!	#NULL!		#NULL!	#NULL!	#NULL!	#NULL!
2019-02-01 11:20:09	260	2019-02-01	fine	#NULL!	1	#NULL!	#NULL!	#NULL!	#NULL!	#NULL!	#NULL!	#NULL!		0	#NULL!	#NULL!	#NULL!	#NULL!	#NULL!	#NULL!	#NULL!	#NULL!	#NULL!	#NULL!	#NULL!	#NULL!	#NULL!	#NULL!	#NULL!	#NULL!	#NULL!	#NULL!	#NULL!	#NULL!	#NULL!	#NULL!	#NULL!	#NULL!	1	0	#NULL!	#NULL!	#NULL!	#NULL!		#NULL!	#NULL!	#NULL!	#NULL!
2019-02-19 09:25:32	260	2019-02-19	had a stomach bug yesterday, but better	#NULL!	1	#NULL!	#NULL!	#NULL!	#NULL!	#NULL!	#NULL!	#NULL!		0	#NULL!	#NULL!	#NULL!	#NULL!	#NULL!	#NULL!	#NULL!	#NULL!	#NULL!	#NULL!	#NULL!	#NULL!	#NULL!	#NULL!	#NULL!	#NULL!	#NULL!	#NULL!	#NULL!	#NULL!	#NULL!	#NULL!	#NULL!	#NULL!	1	6	#NULL!	#NULL!	#NULL!	#NULL!		1	1	1	1
2019-02-01 11:40:31	263	2019-02-01	pretty good	#NULL!	1	#NULL!	#NULL!	#NULL!	#NULL!	#NULL!	#NULL!	#NULL!		0	#NULL!	#NULL!	#NULL!	#NULL!	#NULL!	#NULL!	#NULL!	#NULL!	#NULL!	#NULL!	#NULL!	#NULL!	#NULL!	#NULL!	#NULL!	#NULL!	#NULL!	#NULL!	#NULL!	#NULL!	#NULL!	#NULL!	#NULL!	#NULL!	1	2	#NULL!	#NULL!	#NULL!	#NULL!		1	1	1	1
2019-02-13 11:58:30	263	2019-02-13	not too bad , treat ment as pleasant as can be, okay with that, 2nd bladder scrapping	#NULL!	1	#NULL!	#NULL!	#NULL!	#NULL!	#NULL!	#NULL!	#NULL!		1	5	1	1	1	2	1	1	1	1	1	3	1	3	1	2	2	4	4	1	1	1	2	1	1	1	2	#NULL!	#NULL!	#NULL!	#NULL!		1	1	1	1
2019-02-22 09:47:38	263	2019-02-22	pretty good	#NULL!	1	#NULL!	#NULL!	#NULL!	#NULL!	#NULL!	#NULL!	#NULL!		0	#NULL!	#NULL!	#NULL!	#NULL!	#NULL!	#NULL!	#NULL!	#NULL!	#NULL!	#NULL!	#NULL!	#NULL!	#NULL!	#NULL!	#NULL!	#NULL!	#NULL!	#NULL!	#NULL!	#NULL!	#NULL!	#NULL!	#NULL!	#NULL!	1	2	#NULL!	#NULL!	#NULL!	#NULL!		2	1	1	1
2019-02-26 10:44:31	263	2019-02-26	"OK--getting over a litle upper respiratory thing--still sore from cystoscopy"	#NULL!	1	#NULL!	#NULL!	#NULL!	#NULL!	#NULL!	#NULL!	#NULL!		0	#NULL!	#NULL!	#NULL!	#NULL!	#NULL!	#NULL!	#NULL!	#NULL!	#NULL!	#NULL!	#NULL!	#NULL!	#NULL!	#NULL!	#NULL!	#NULL!	#NULL!	#NULL!	#NULL!	#NULL!	#NULL!	#NULL!	#NULL!	#NULL!	1	3	#NULL!	#NULL!	#NULL!	#NULL!		2	2	2	2
2019-02-01 15:49:55	265	2019-02-01	fine	#NULL!	1	#NULL!	#NULL!	#NULL!	#NULL!	#NULL!	#NULL!	#NULL!		0	#NULL!	#NULL!	#NULL!	#NULL!	#NULL!	#NULL!	#NULL!	#NULL!	#NULL!	#NULL!	#NULL!	#NULL!	#NULL!	#NULL!	#NULL!	#NULL!	#NULL!	#NULL!	#NULL!	#NULL!	#NULL!	#NULL!	#NULL!	#NULL!	1	3	#NULL!	#NULL!	#NULL!	#NULL!		1	1	1	1
2019-02-15 13:16:51	265	2019-02-15	Fine, just radiation irritation.	#NULL!	1	#NULL!	#NULL!	#NULL!	#NULL!	#NULL!	#NULL!	#NULL!		0	#NULL!	#NULL!	#NULL!	#NULL!	#NULL!	#NULL!	#NULL!	#NULL!	#NULL!	#NULL!	#NULL!	#NULL!	#NULL!	#NULL!	#NULL!	#NULL!	#NULL!	#NULL!	#NULL!	#NULL!	#NULL!	#NULL!	#NULL!	#NULL!	#NULL!	#NULL!	#NULL!	#NULL!	#NULL!	#NULL!		#NULL!	#NULL!	#NULL!	#NULL!
2019-02-19 09:18:33	265	2019-02-19	skin is really burnt	#NULL!	1	#NULL!	#NULL!	#NULL!	#NULL!	#NULL!	#NULL!	#NULL!		1	1	1	1	1	1	1	1	1	1	1	1	1	3	3	3	3	3	4	2	1	1	1	1	1	1	5	#NULL!	#NULL!	#NULL!	#NULL!		1	1	1	1
2019-03-20 16:23:54	266	2019-03-20	Good	#NULL!	1	#NULL!	#NULL!	#NULL!	#NULL!	#NULL!	#NULL!	#NULL!		0	#NULL!	#NULL!	#NULL!	#NULL!	#NULL!	#NULL!	#NULL!	#NULL!	#NULL!	#NULL!	#NULL!	#NULL!	#NULL!	#NULL!	#NULL!	#NULL!	#NULL!	#NULL!	#NULL!	#NULL!	#NULL!	#NULL!	#NULL!	#NULL!	1	1	#NULL!	#NULL!	#NULL!	#NULL!		1	1	1	1
2019-03-25 14:41:57	266	2019-03-25	pretty good	#NULL!	1	#NULL!	#NULL!	#NULL!	#NULL!	#NULL!	#NULL!	#NULL!		0	#NULL!	#NULL!	#NULL!	#NULL!	#NULL!	#NULL!	#NULL!	#NULL!	#NULL!	#NULL!	#NULL!	#NULL!	#NULL!	#NULL!	#NULL!	#NULL!	#NULL!	#NULL!	#NULL!	#NULL!	#NULL!	#NULL!	#NULL!	#NULL!	1	1	#NULL!	#NULL!	#NULL!	#NULL!		1	1	1	1
2019-04-09 10:41:31	267	2019-04-09	Ok	#NULL!	1	1	#NULL!	#NULL!	#NULL!	1	#NULL!	#NULL!		1	1	1	1	1	1	1	1	1	1	1	1	1	3	2	3	3	3	3	3	1	1	1	1	1	1	0	#NULL!	#NULL!	#NULL!	#NULL!		#NULL!	#NULL!	#NULL!	#NULL!
2019-04-18 08:50:42	267	2019-04-18	Ok	#NULL!	1	1	#NULL!	#NULL!	#NULL!	1	#NULL!	#NULL!		0	#NULL!	#NULL!	#NULL!	#NULL!	#NULL!	#NULL!	#NULL!	#NULL!	#NULL!	#NULL!	#NULL!	#NULL!	#NULL!	#NULL!	#NULL!	#NULL!	#NULL!	#NULL!	#NULL!	#NULL!	#NULL!	#NULL!	#NULL!	#NULL!	1	0	#NULL!	#NULL!	#NULL!	#NULL!		#NULL!	#NULL!	#NULL!	#NULL!
2019-04-23 20:09:51	267	2019-04-23	ok	#NULL!	1	1	#NULL!	#NULL!	#NULL!	1	#NULL!	#NULL!		1	2	1	1	1	1	1	1	1	1	1	1	1	3	2	2	2	3	3	3	1	2	1	1	1	1	2	#NULL!	#NULL!	#NULL!	#NULL!		2	1	1	1
2019-02-19 12:47:00	269	2019-02-19	"I feel good."	#NULL!	1	#NULL!	#NULL!	#NULL!	#NULL!	#NULL!	#NULL!	#NULL!		0	#NULL!	#NULL!	#NULL!	#NULL!	#NULL!	#NULL!	#NULL!	#NULL!	#NULL!	#NULL!	#NULL!	#NULL!	#NULL!	#NULL!	#NULL!	#NULL!	#NULL!	#NULL!	#NULL!	#NULL!	#NULL!	#NULL!	#NULL!	#NULL!	1	0	#NULL!	#NULL!	#NULL!	#NULL!		#NULL!	#NULL!	#NULL!	#NULL!
2019-02-26 10:55:38	269	2019-02-26	"a little more tired every day, but OK"	#NULL!	1	#NULL!	#NULL!	#NULL!	#NULL!	#NULL!	#NULL!	#NULL!		0	#NULL!	#NULL!	#NULL!	#NULL!	#NULL!	#NULL!	#NULL!	#NULL!	#NULL!	#NULL!	#NULL!	#NULL!	#NULL!	#NULL!	#NULL!	#NULL!	#NULL!	#NULL!	#NULL!	#NULL!	#NULL!	#NULL!	#NULL!	#NULL!	1	0	#NULL!	#NULL!	#NULL!	#NULL!		#NULL!	#NULL!	#NULL!	#NULL!
2019-03-11 20:14:54	270	2019-03-11	Tired	#NULL!	1	#NULL!	#NULL!	#NULL!	#NULL!	#NULL!	#NULL!	1	Zolodex	0	#NULL!	#NULL!	#NULL!	#NULL!	#NULL!	#NULL!	#NULL!	#NULL!	#NULL!	#NULL!	#NULL!	#NULL!	#NULL!	#NULL!	#NULL!	#NULL!	#NULL!	#NULL!	#NULL!	#NULL!	#NULL!	#NULL!	#NULL!	#NULL!	1	5	#NULL!	#NULL!	#NULL!	#NULL!		3	3	3	2
2019-03-28 17:33:19	270	2019-03-28	Good to fair+	#NULL!	1	#NULL!	#NULL!	#NULL!	#NULL!	#NULL!	#NULL!	1	Zolodex	1	3	3	1	2	1	2	2	3	1	1	1	1	4	3	4	4	3	2	3	3	4	3	2	4	1	4	#NULL!	#NULL!	#NULL!	#NULL!		2	2	2	2
2019-02-22 10:10:57	271	2019-02-22	bout of nausea and diarrhea last night; increasing armpit soreness; breast is taking on leathery appearance	#NULL!	1	#NULL!	#NULL!	#NULL!	#NULL!	#NULL!	#NULL!	#NULL!		1	1	1	1	1	1	1	1	1	1	1	1	1	3	1	3	3	3	3	3	3	1	1	1	1	1	2	#NULL!	#NULL!	#NULL!	#NULL!		1	1	1	1
2019-03-01 11:13:00	271	2019-03-01	better this week	#NULL!	1	#NULL!	#NULL!	#NULL!	#NULL!	#NULL!	#NULL!	#NULL!		0	#NULL!	#NULL!	#NULL!	#NULL!	#NULL!	#NULL!	#NULL!	#NULL!	#NULL!	#NULL!	#NULL!	#NULL!	#NULL!	#NULL!	#NULL!	#NULL!	#NULL!	#NULL!	#NULL!	#NULL!	#NULL!	#NULL!	#NULL!	#NULL!	1	2	#NULL!	#NULL!	#NULL!	#NULL!		1	1	1	1
2019-02-27 14:23:25	273	2019-02-27	Hands neuropathy and feet and joints and kness	#NULL!	1	#NULL!	#NULL!	#NULL!	#NULL!	#NULL!	#NULL!	1	start radiation on monday, went through chemo prior to surgery	1	4	1	4	4	1	1	3	3	1	1	2	1	4	4	4	4	2	1	4	2	3	4	5	4	1	6	#NULL!	#NULL!	#NULL!	#NULL!		4	4	4	4
2019-04-15 12:50:57	273	2019-04-15	good.	#NULL!	1	#NULL!	1	#NULL!	#NULL!	1	#NULL!	#NULL!		0	#NULL!	#NULL!	#NULL!	#NULL!	#NULL!	#NULL!	#NULL!	#NULL!	#NULL!	#NULL!	#NULL!	#NULL!	#NULL!	#NULL!	#NULL!	#NULL!	#NULL!	#NULL!	#NULL!	#NULL!	#NULL!	#NULL!	#NULL!	#NULL!	1	5	#NULL!	#NULL!	#NULL!	#NULL!		3	3	3	3
2019-02-14 17:36:08	274	2019-02-14	a little tired but not too bad.	#NULL!	1	#NULL!	#NULL!	#NULL!	#NULL!	#NULL!	#NULL!	#NULL!		1	2	2	1	1	3	1	2	1	1	1	1	1	2	2	2	2	4	4	1	2	3	1	3	3	1	0	#NULL!	#NULL!	#NULL!	#NULL!		#NULL!	#NULL!	#NULL!	#NULL!
2019-03-03 13:23:19	274	#NULL!	Pretty much the same. A little tired from the extra time traveling to the treatments. So far I do not have any skin issues from the radiation.	#NULL!	1	#NULL!	#NULL!	#NULL!	#NULL!	#NULL!	#NULL!	#NULL!		1	2	1	1	1	3	2	1	1	1	2	2	1	3	2	2	2	3	3	2	2	2	1	2	2	1	0	#NULL!	#NULL!	#NULL!	#NULL!		#NULL!	#NULL!	#NULL!	#NULL!
2019-03-03 13:31:14	274	2019-03-03	Just a little tired.	#NULL!	1	#NULL!	#NULL!	#NULL!	#NULL!	#NULL!	#NULL!	#NULL!		0	#NULL!	#NULL!	#NULL!	#NULL!	#NULL!	#NULL!	#NULL!	#NULL!	#NULL!	#NULL!	#NULL!	#NULL!	#NULL!	#NULL!	#NULL!	#NULL!	#NULL!	#NULL!	#NULL!	#NULL!	#NULL!	#NULL!	#NULL!	#NULL!	1	0	#NULL!	#NULL!	#NULL!	#NULL!		#NULL!	#NULL!	#NULL!	#NULL!
2019-03-20 13:51:02	275	2019-03-21	GOOD	#NULL!	1	1	#NULL!	#NULL!	#NULL!	#NULL!	#NULL!	#NULL!		0	#NULL!	#NULL!	#NULL!	#NULL!	#NULL!	#NULL!	#NULL!	#NULL!	#NULL!	#NULL!	#NULL!	#NULL!	#NULL!	#NULL!	#NULL!	#NULL!	#NULL!	#NULL!	#NULL!	#NULL!	#NULL!	#NULL!	#NULL!	#NULL!	1	1	#NULL!	#NULL!	#NULL!	#NULL!		1	1	1	1
2019-03-20 19:51:03	275	2019-03-20	good	#NULL!	1	1	#NULL!	#NULL!	#NULL!	#NULL!	#NULL!	#NULL!		0	#NULL!	#NULL!	#NULL!	#NULL!	#NULL!	#NULL!	#NULL!	#NULL!	#NULL!	#NULL!	#NULL!	#NULL!	#NULL!	#NULL!	#NULL!	#NULL!	#NULL!	#NULL!	#NULL!	#NULL!	#NULL!	#NULL!	#NULL!	#NULL!	1	1	#NULL!	#NULL!	#NULL!	#NULL!		1	1	1	1
2019-03-25 14:46:55	275	2019-03-25	good.	#NULL!	1	1	#NULL!	#NULL!	#NULL!	#NULL!	#NULL!	#NULL!		0	#NULL!	#NULL!	#NULL!	#NULL!	#NULL!	#NULL!	#NULL!	#NULL!	#NULL!	#NULL!	#NULL!	#NULL!	#NULL!	#NULL!	#NULL!	#NULL!	#NULL!	#NULL!	#NULL!	#NULL!	#NULL!	#NULL!	#NULL!	#NULL!	1	0	#NULL!	#NULL!	#NULL!	#NULL!		#NULL!	#NULL!	#NULL!	#NULL!
2019-02-27 10:46:44	276	2019-02-27	Great, last week of radiation is next week.	#NULL!	1	#NULL!	#NULL!	#NULL!	#NULL!	#NULL!	#NULL!	#NULL!		0	#NULL!	#NULL!	#NULL!	#NULL!	#NULL!	#NULL!	#NULL!	#NULL!	#NULL!	#NULL!	#NULL!	#NULL!	#NULL!	#NULL!	#NULL!	#NULL!	#NULL!	#NULL!	#NULL!	#NULL!	#NULL!	#NULL!	#NULL!	#NULL!	1	0	#NULL!	#NULL!	#NULL!	#NULL!		#NULL!	#NULL!	#NULL!	#NULL!
2019-02-19 13:40:24	278	2019-02-19	sleepy	#NULL!	1	#NULL!	#NULL!	#NULL!	#NULL!	#NULL!	#NULL!	#NULL!		1	1	1	1	1	1	1	1	1	1	1	1	1	1	1	1	1	5	5	1	1	1	1	1	1	1	1	#NULL!	#NULL!	#NULL!	#NULL!		1	1	1	1
2019-02-26 14:31:32	278	2019-02-26	very tired	#NULL!	1	#NULL!	#NULL!	#NULL!	#NULL!	#NULL!	#NULL!	#NULL!		1	1	1	1	1	1	1	1	1	1	1	1	1	5	3	5	5	5	4	1	1	1	1	1	1	1	0	#NULL!	#NULL!	#NULL!	#NULL!		#NULL!	#NULL!	#NULL!	#NULL!
2019-02-26 20:31:38	279	2019-02-26	Great	#NULL!	1	#NULL!	#NULL!	#NULL!	#NULL!	#NULL!	#NULL!	#NULL!		0	#NULL!	#NULL!	#NULL!	#NULL!	#NULL!	#NULL!	#NULL!	#NULL!	#NULL!	#NULL!	#NULL!	#NULL!	#NULL!	#NULL!	#NULL!	#NULL!	#NULL!	#NULL!	#NULL!	#NULL!	#NULL!	#NULL!	#NULL!	#NULL!	1	0	#NULL!	#NULL!	#NULL!	#NULL!		#NULL!	#NULL!	#NULL!	#NULL!
2019-03-12 13:04:52	279	2019-03-12	Good	#NULL!	1	#NULL!	#NULL!	#NULL!	#NULL!	#NULL!	#NULL!	#NULL!		0	#NULL!	#NULL!	#NULL!	#NULL!	#NULL!	#NULL!	#NULL!	#NULL!	#NULL!	#NULL!	#NULL!	#NULL!	#NULL!	#NULL!	#NULL!	#NULL!	#NULL!	#NULL!	#NULL!	#NULL!	#NULL!	#NULL!	#NULL!	#NULL!	1	0	#NULL!	#NULL!	#NULL!	#NULL!		#NULL!	#NULL!	#NULL!	#NULL!
2019-03-18 20:26:44	279	2019-03-18	Good	#NULL!	1	#NULL!	#NULL!	#NULL!	#NULL!	#NULL!	#NULL!	#NULL!		0	#NULL!	#NULL!	#NULL!	#NULL!	#NULL!	#NULL!	#NULL!	#NULL!	#NULL!	#NULL!	#NULL!	#NULL!	#NULL!	#NULL!	#NULL!	#NULL!	#NULL!	#NULL!	#NULL!	#NULL!	#NULL!	#NULL!	#NULL!	#NULL!	1	0	#NULL!	#NULL!	#NULL!	#NULL!		#NULL!	#NULL!	#NULL!	#NULL!
2019-03-18 15:26:20	281	2019-03-18	good	#NULL!	1	#NULL!	#NULL!	#NULL!	#NULL!	#NULL!	#NULL!	#NULL!		0	#NULL!	#NULL!	#NULL!	#NULL!	#NULL!	#NULL!	#NULL!	#NULL!	#NULL!	#NULL!	#NULL!	#NULL!	#NULL!	#NULL!	#NULL!	#NULL!	#NULL!	#NULL!	#NULL!	#NULL!	#NULL!	#NULL!	#NULL!	#NULL!	1	0	#NULL!	#NULL!	#NULL!	#NULL!		#NULL!	#NULL!	#NULL!	#NULL!
2019-06-13 11:37:11	282	2019-06-13	ok	#NULL!	1	#NULL!	#NULL!	#NULL!	#NULL!	#NULL!	#NULL!	#NULL!		0	#NULL!	#NULL!	#NULL!	#NULL!	#NULL!	#NULL!	#NULL!	#NULL!	#NULL!	#NULL!	#NULL!	#NULL!	#NULL!	#NULL!	#NULL!	#NULL!	#NULL!	#NULL!	#NULL!	#NULL!	#NULL!	#NULL!	#NULL!	#NULL!	1	0	#NULL!	#NULL!	#NULL!	#NULL!		#NULL!	#NULL!	#NULL!	#NULL!
2019-06-21 16:47:58	282	2019-06-21	ok	#NULL!	1	#NULL!	#NULL!	#NULL!	#NULL!	#NULL!	#NULL!	#NULL!		0	#NULL!	#NULL!	#NULL!	#NULL!	#NULL!	#NULL!	#NULL!	#NULL!	#NULL!	#NULL!	#NULL!	#NULL!	#NULL!	#NULL!	#NULL!	#NULL!	#NULL!	#NULL!	#NULL!	#NULL!	#NULL!	#NULL!	#NULL!	#NULL!	1	0	#NULL!	#NULL!	#NULL!	#NULL!		#NULL!	#NULL!	#NULL!	#NULL!
2019-06-24 10:30:15	282	2019-06-24	OKAY	#NULL!	1	#NULL!	#NULL!	#NULL!	#NULL!	#NULL!	#NULL!	#NULL!		0	#NULL!	#NULL!	#NULL!	#NULL!	#NULL!	#NULL!	#NULL!	#NULL!	#NULL!	#NULL!	#NULL!	#NULL!	#NULL!	#NULL!	#NULL!	#NULL!	#NULL!	#NULL!	#NULL!	#NULL!	#NULL!	#NULL!	#NULL!	#NULL!	1	0	#NULL!	#NULL!	#NULL!	#NULL!		#NULL!	#NULL!	#NULL!	#NULL!
2019-06-21 11:47:53	285	2019-06-21	pretty good--started radiation--table bothers my back	#NULL!	1	#NULL!	#NULL!	#NULL!	#NULL!	1	#NULL!	#NULL!		0	#NULL!	#NULL!	#NULL!	#NULL!	#NULL!	#NULL!	#NULL!	#NULL!	#NULL!	#NULL!	#NULL!	#NULL!	#NULL!	#NULL!	#NULL!	#NULL!	#NULL!	#NULL!	#NULL!	#NULL!	#NULL!	#NULL!	#NULL!	#NULL!	1	0	#NULL!	#NULL!	#NULL!	#NULL!		#NULL!	#NULL!	#NULL!	#NULL!
2019-06-24 10:36:45	285	2019-06-26	GOOD.	#NULL!	1	#NULL!	#NULL!	#NULL!	#NULL!	1	#NULL!	#NULL!		0	#NULL!	#NULL!	#NULL!	#NULL!	#NULL!	#NULL!	#NULL!	#NULL!	#NULL!	#NULL!	#NULL!	#NULL!	#NULL!	#NULL!	#NULL!	#NULL!	#NULL!	#NULL!	#NULL!	#NULL!	#NULL!	#NULL!	#NULL!	#NULL!	1	0	#NULL!	#NULL!	#NULL!	#NULL!		#NULL!	#NULL!	#NULL!	#NULL!
2019-07-15 12:30:09	287	2019-07-15	good	#NULL!	1	#NULL!	#NULL!	#NULL!	#NULL!	1	#NULL!	#NULL!		0	#NULL!	#NULL!	#NULL!	#NULL!	#NULL!	#NULL!	#NULL!	#NULL!	#NULL!	#NULL!	#NULL!	#NULL!	#NULL!	#NULL!	#NULL!	#NULL!	#NULL!	#NULL!	#NULL!	#NULL!	#NULL!	#NULL!	#NULL!	#NULL!	1	0	#NULL!	#NULL!	#NULL!	#NULL!		#NULL!	#NULL!	#NULL!	#NULL!
2019-08-12 19:45:11	287	2019-08-12	good	#NULL!	1	#NULL!	#NULL!	#NULL!	#NULL!	1	#NULL!	#NULL!		0	#NULL!	#NULL!	#NULL!	#NULL!	#NULL!	#NULL!	#NULL!	#NULL!	#NULL!	#NULL!	#NULL!	#NULL!	#NULL!	#NULL!	#NULL!	#NULL!	#NULL!	#NULL!	#NULL!	#NULL!	#NULL!	#NULL!	#NULL!	#NULL!	1	0	#NULL!	#NULL!	#NULL!	#NULL!		#NULL!	#NULL!	#NULL!	#NULL!
2019-08-19 11:15:52	287	2019-08-19	Good	#NULL!	1	#NULL!	#NULL!	#NULL!	#NULL!	1	#NULL!	#NULL!		0	#NULL!	#NULL!	#NULL!	#NULL!	#NULL!	#NULL!	#NULL!	#NULL!	#NULL!	#NULL!	#NULL!	#NULL!	#NULL!	#NULL!	#NULL!	#NULL!	#NULL!	#NULL!	#NULL!	#NULL!	#NULL!	#NULL!	#NULL!	#NULL!	1	0	#NULL!	#NULL!	#NULL!	#NULL!		#NULL!	#NULL!	#NULL!	#NULL!
2019-03-26 12:01:06	290	2019-03-26	"pretty good"	#NULL!	1	#NULL!	#NULL!	#NULL!	1	1	#NULL!	#NULL!		0	#NULL!	#NULL!	#NULL!	#NULL!	#NULL!	#NULL!	#NULL!	#NULL!	#NULL!	#NULL!	#NULL!	#NULL!	#NULL!	#NULL!	#NULL!	#NULL!	#NULL!	#NULL!	#NULL!	#NULL!	#NULL!	#NULL!	#NULL!	#NULL!	1	0	#NULL!	#NULL!	#NULL!	#NULL!		#NULL!	#NULL!	#NULL!	#NULL!
2019-04-19 12:14:37	290	2019-04-19	pretty good	#NULL!	1	#NULL!	#NULL!	#NULL!	1	1	#NULL!	#NULL!		0	#NULL!	#NULL!	#NULL!	#NULL!	#NULL!	#NULL!	#NULL!	#NULL!	#NULL!	#NULL!	#NULL!	#NULL!	#NULL!	#NULL!	#NULL!	#NULL!	#NULL!	#NULL!	#NULL!	#NULL!	#NULL!	#NULL!	#NULL!	#NULL!	1	0	#NULL!	#NULL!	#NULL!	#NULL!		#NULL!	#NULL!	#NULL!	#NULL!
2019-08-30 13:53:45	293	2019-08-30	fingers are coming along--a couple still hurting--finished antibiotic	#NULL!	1	#NULL!	#NULL!	#NULL!	#NULL!	#NULL!	#NULL!	#NULL!		0	#NULL!	#NULL!	#NULL!	#NULL!	#NULL!	#NULL!	#NULL!	#NULL!	#NULL!	#NULL!	#NULL!	#NULL!	#NULL!	#NULL!	#NULL!	#NULL!	#NULL!	#NULL!	#NULL!	#NULL!	#NULL!	#NULL!	#NULL!	#NULL!	1	2	#NULL!	#NULL!	#NULL!	#NULL!		1	1	1	1
2019-09-13 10:16:45	293	2019-09-13	pretty good	#NULL!	1	#NULL!	#NULL!	#NULL!	#NULL!	#NULL!	#NULL!	#NULL!		0	#NULL!	#NULL!	#NULL!	#NULL!	#NULL!	#NULL!	#NULL!	#NULL!	#NULL!	#NULL!	#NULL!	#NULL!	#NULL!	#NULL!	#NULL!	#NULL!	#NULL!	#NULL!	#NULL!	#NULL!	#NULL!	#NULL!	#NULL!	#NULL!	1	6	#NULL!	#NULL!	#NULL!	#NULL!		3	3	3	3
2019-04-15 17:16:40	294	#NULL!	Ok, but stressed	#NULL!	1	#NULL!	#NULL!	#NULL!	#NULL!	#NULL!	#NULL!	#NULL!		1	2	1	1	2	2	2	2	2	1	2	2	1	2	1	2	1	3	3	3	2	2	2	2	2	1	3	#NULL!	#NULL!	#NULL!	#NULL!		2	2	2	2
2019-04-26 11:49:15	294	2019-04-26	Good, no problems	#NULL!	1	#NULL!	#NULL!	#NULL!	#NULL!	#NULL!	#NULL!	#NULL!		1	1	1	1	1	2	1	1	2	1	1	1	1	2	1	1	2	4	4	2	1	1	1	1	1	1	2	#NULL!	#NULL!	#NULL!	#NULL!		2	2	2	1
2019-04-24 13:39:32	296	2019-04-24	real good	#NULL!	1	#NULL!	#NULL!	#NULL!	#NULL!	#NULL!	#NULL!	#NULL!		0	#NULL!	#NULL!	#NULL!	#NULL!	#NULL!	#NULL!	#NULL!	#NULL!	#NULL!	#NULL!	#NULL!	#NULL!	#NULL!	#NULL!	#NULL!	#NULL!	#NULL!	#NULL!	#NULL!	#NULL!	#NULL!	#NULL!	#NULL!	#NULL!	1	0	#NULL!	#NULL!	#NULL!	#NULL!		#NULL!	#NULL!	#NULL!	#NULL!
2019-05-16 14:13:38	296	2019-05-16	Just fine	#NULL!	1	#NULL!	#NULL!	#NULL!	#NULL!	#NULL!	#NULL!	#NULL!		0	#NULL!	#NULL!	#NULL!	#NULL!	#NULL!	#NULL!	#NULL!	#NULL!	#NULL!	#NULL!	#NULL!	#NULL!	#NULL!	#NULL!	#NULL!	#NULL!	#NULL!	#NULL!	#NULL!	#NULL!	#NULL!	#NULL!	#NULL!	#NULL!	1	0	#NULL!	#NULL!	#NULL!	#NULL!		#NULL!	#NULL!	#NULL!	#NULL!
2019-10-24 17:39:47	297	2019-10-24	Great	#NULL!	1	#NULL!	#NULL!	#NULL!	#NULL!	#NULL!	#NULL!	#NULL!		0	#NULL!	#NULL!	#NULL!	#NULL!	#NULL!	#NULL!	#NULL!	#NULL!	#NULL!	#NULL!	#NULL!	#NULL!	#NULL!	#NULL!	#NULL!	#NULL!	#NULL!	#NULL!	#NULL!	#NULL!	#NULL!	#NULL!	#NULL!	#NULL!	1	1	#NULL!	#NULL!	#NULL!	#NULL!		2	1	1	2
2019-11-24 20:29:09	297	2019-11-24	Ok	#NULL!	1	#NULL!	#NULL!	#NULL!	#NULL!	#NULL!	#NULL!	#NULL!		1	3	2	2	3	2	2	2	1	1	1	2	1	4	4	4	4	3	3	3	2	4	4	3	4	1	5	#NULL!	#NULL!	#NULL!	#NULL!		4	4	4	4
2019-12-04 16:07:01	297	2019-12-04	Awful	#NULL!	1	#NULL!	#NULL!	#NULL!	#NULL!	#NULL!	#NULL!	#NULL!		1	4	4	4	4	3	4	4	3	1	1	3	2	5	5	5	5	2	2	2	2	4	4	4	4	2	8	#NULL!	#NULL!	#NULL!	#NULL!		4	4	4	4
2019-04-19 19:18:34	300	2019-04-18	OK	#NULL!	1	#NULL!	#NULL!	#NULL!	#NULL!	#NULL!	#NULL!	#NULL!		1	1	1	1	1	1	2	2	1	2	1	1	1	2	3	3	3	5	3	1	1	2	2	2	2	1	0	#NULL!	#NULL!	#NULL!	#NULL!		#NULL!	#NULL!	#NULL!	#NULL!
2019-05-13 14:12:48	302	2019-05-13	pretty well	#NULL!	1	#NULL!	#NULL!	#NULL!	#NULL!	#NULL!	#NULL!	1	monthly zolodex	0	#NULL!	#NULL!	#NULL!	#NULL!	#NULL!	#NULL!	#NULL!	#NULL!	#NULL!	#NULL!	#NULL!	#NULL!	#NULL!	#NULL!	#NULL!	#NULL!	#NULL!	#NULL!	#NULL!	#NULL!	#NULL!	#NULL!	#NULL!	#NULL!	1	2	#NULL!	#NULL!	#NULL!	#NULL!		1	1	1	1
2019-05-21 11:17:23	302	2019-05-21	pretty well	#NULL!	1	#NULL!	#NULL!	#NULL!	#NULL!	#NULL!	#NULL!	1	zoladex	0	#NULL!	#NULL!	#NULL!	#NULL!	#NULL!	#NULL!	#NULL!	#NULL!	#NULL!	#NULL!	#NULL!	#NULL!	#NULL!	#NULL!	#NULL!	#NULL!	#NULL!	#NULL!	#NULL!	#NULL!	#NULL!	#NULL!	#NULL!	#NULL!	1	2	#NULL!	#NULL!	#NULL!	#NULL!		3	3	1	3
2019-06-20 13:30:07	306	2019-06-20	no problems	#NULL!	1	#NULL!	#NULL!	#NULL!	#NULL!	#NULL!	#NULL!	#NULL!		0	#NULL!	#NULL!	#NULL!	#NULL!	#NULL!	#NULL!	#NULL!	#NULL!	#NULL!	#NULL!	#NULL!	#NULL!	#NULL!	#NULL!	#NULL!	#NULL!	#NULL!	#NULL!	#NULL!	#NULL!	#NULL!	#NULL!	#NULL!	#NULL!	1	0	#NULL!	#NULL!	#NULL!	#NULL!		#NULL!	#NULL!	#NULL!	#NULL!
2019-05-15 17:49:05	307	2019-05-15	Good	#NULL!	1	1	#NULL!	#NULL!	1	1	#NULL!	#NULL!		0	#NULL!	#NULL!	#NULL!	#NULL!	#NULL!	#NULL!	#NULL!	#NULL!	#NULL!	#NULL!	#NULL!	#NULL!	#NULL!	#NULL!	#NULL!	#NULL!	#NULL!	#NULL!	#NULL!	#NULL!	#NULL!	#NULL!	#NULL!	#NULL!	1	2	#NULL!	#NULL!	#NULL!	#NULL!		2	2	1	2
2019-05-23 15:38:39	307	2019-05-23	very tired	#NULL!	1	1	#NULL!	#NULL!	1	1	#NULL!	#NULL!		1	1	2	3	2	1	1	1	1	1	1	1	1	2	1	3	2	4	2	1	1	1	1	1	1	1	2	#NULL!	#NULL!	#NULL!	#NULL!		2	2	1	2
2019-06-13 06:55:55	307	2019-06-13	Good	#NULL!	1	1	#NULL!	#NULL!	1	1	#NULL!	#NULL!		0	#NULL!	#NULL!	#NULL!	#NULL!	#NULL!	#NULL!	#NULL!	#NULL!	#NULL!	#NULL!	#NULL!	#NULL!	#NULL!	#NULL!	#NULL!	#NULL!	#NULL!	#NULL!	#NULL!	#NULL!	#NULL!	#NULL!	#NULL!	#NULL!	1	2	#NULL!	#NULL!	#NULL!	#NULL!		2	2	2	2
2019-06-18 14:59:14	307	2019-06-18	Tierd	#NULL!	1	1	#NULL!	#NULL!	1	1	#NULL!	#NULL!		0	#NULL!	#NULL!	#NULL!	#NULL!	#NULL!	#NULL!	#NULL!	#NULL!	#NULL!	#NULL!	#NULL!	#NULL!	#NULL!	#NULL!	#NULL!	#NULL!	#NULL!	#NULL!	#NULL!	#NULL!	#NULL!	#NULL!	#NULL!	#NULL!	1	3	#NULL!	#NULL!	#NULL!	#NULL!		2	4	3	5
2019-06-25 13:53:28	307	2019-06-25	Good	#NULL!	1	1	#NULL!	#NULL!	1	1	#NULL!	#NULL!		0	#NULL!	#NULL!	#NULL!	#NULL!	#NULL!	#NULL!	#NULL!	#NULL!	#NULL!	#NULL!	#NULL!	#NULL!	#NULL!	#NULL!	#NULL!	#NULL!	#NULL!	#NULL!	#NULL!	#NULL!	#NULL!	#NULL!	#NULL!	#NULL!	1	1	#NULL!	#NULL!	#NULL!	#NULL!		2	2	2	2
2019-05-13 13:09:05	309	2019-05-13	good	#NULL!	1	#NULL!	#NULL!	#NULL!	#NULL!	#NULL!	#NULL!	#NULL!		0	#NULL!	#NULL!	#NULL!	#NULL!	#NULL!	#NULL!	#NULL!	#NULL!	#NULL!	#NULL!	#NULL!	#NULL!	#NULL!	#NULL!	#NULL!	#NULL!	#NULL!	#NULL!	#NULL!	#NULL!	#NULL!	#NULL!	#NULL!	#NULL!	1	5	#NULL!	#NULL!	#NULL!	#NULL!		4	4	4	4
2019-06-18 11:11:56	311	2019-06-18	fine	#NULL!	1	#NULL!	#NULL!	#NULL!	#NULL!	#NULL!	#NULL!	#NULL!		0	#NULL!	#NULL!	#NULL!	#NULL!	#NULL!	#NULL!	#NULL!	#NULL!	#NULL!	#NULL!	#NULL!	#NULL!	#NULL!	#NULL!	#NULL!	#NULL!	#NULL!	#NULL!	#NULL!	#NULL!	#NULL!	#NULL!	#NULL!	#NULL!	1	1	#NULL!	#NULL!	#NULL!	#NULL!		1	1	1	1
2019-05-16 11:01:14	316	2019-05-16	Really good	#NULL!	1	#NULL!	#NULL!	#NULL!	#NULL!	#NULL!	#NULL!	#NULL!		1	1	1	1	1	2	1	1	1	1	1	1	1	1	1	1	1	4	1	2	2	1	1	1	1	1	0	#NULL!	#NULL!	#NULL!	#NULL!		#NULL!	#NULL!	#NULL!	#NULL!
2019-05-21 10:33:34	316	2019-05-21	Fine	#NULL!	1	#NULL!	#NULL!	#NULL!	#NULL!	#NULL!	#NULL!	#NULL!		0	#NULL!	#NULL!	#NULL!	#NULL!	#NULL!	#NULL!	#NULL!	#NULL!	#NULL!	#NULL!	#NULL!	#NULL!	#NULL!	#NULL!	#NULL!	#NULL!	#NULL!	#NULL!	#NULL!	#NULL!	#NULL!	#NULL!	#NULL!	#NULL!	1	1	#NULL!	#NULL!	#NULL!	#NULL!		1	1	1	1
2019-06-13 11:46:52	316	2019-06-13	great	#NULL!	1	#NULL!	#NULL!	#NULL!	#NULL!	#NULL!	#NULL!	#NULL!		0	#NULL!	#NULL!	#NULL!	#NULL!	#NULL!	#NULL!	#NULL!	#NULL!	#NULL!	#NULL!	#NULL!	#NULL!	#NULL!	#NULL!	#NULL!	#NULL!	#NULL!	#NULL!	#NULL!	#NULL!	#NULL!	#NULL!	#NULL!	#NULL!	1	4	#NULL!	#NULL!	#NULL!	#NULL!		1	1	1	1
2019-06-10 10:50:57	317	2019-06-10	good	#NULL!	1	#NULL!	#NULL!	#NULL!	#NULL!	#NULL!	#NULL!	#NULL!		0	#NULL!	#NULL!	#NULL!	#NULL!	#NULL!	#NULL!	#NULL!	#NULL!	#NULL!	#NULL!	#NULL!	#NULL!	#NULL!	#NULL!	#NULL!	#NULL!	#NULL!	#NULL!	#NULL!	#NULL!	#NULL!	#NULL!	#NULL!	#NULL!	1	3	#NULL!	#NULL!	#NULL!	#NULL!		2	2	2	2
2019-06-17 12:32:28	317	2019-06-17	good	#NULL!	1	#NULL!	#NULL!	#NULL!	#NULL!	#NULL!	#NULL!	#NULL!		0	#NULL!	#NULL!	#NULL!	#NULL!	#NULL!	#NULL!	#NULL!	#NULL!	#NULL!	#NULL!	#NULL!	#NULL!	#NULL!	#NULL!	#NULL!	#NULL!	#NULL!	#NULL!	#NULL!	#NULL!	#NULL!	#NULL!	#NULL!	#NULL!	1	2	#NULL!	#NULL!	#NULL!	#NULL!		1	1	2	1
2019-06-24 13:41:22	317	2019-06-24	good	#NULL!	1	#NULL!	#NULL!	#NULL!	#NULL!	#NULL!	#NULL!	#NULL!		0	#NULL!	#NULL!	#NULL!	#NULL!	#NULL!	#NULL!	#NULL!	#NULL!	#NULL!	#NULL!	#NULL!	#NULL!	#NULL!	#NULL!	#NULL!	#NULL!	#NULL!	#NULL!	#NULL!	#NULL!	#NULL!	#NULL!	#NULL!	#NULL!	1	1	#NULL!	#NULL!	#NULL!	#NULL!		1	1	2	1
2019-06-13 12:31:58	320	2019-06-13	ok	#NULL!	1	#NULL!	#NULL!	#NULL!	#NULL!	#NULL!	#NULL!	#NULL!		0	#NULL!	#NULL!	#NULL!	#NULL!	#NULL!	#NULL!	#NULL!	#NULL!	#NULL!	#NULL!	#NULL!	#NULL!	#NULL!	#NULL!	#NULL!	#NULL!	#NULL!	#NULL!	#NULL!	#NULL!	#NULL!	#NULL!	#NULL!	#NULL!	1	2	#NULL!	#NULL!	#NULL!	#NULL!		1	1	1	1
2019-06-21 10:45:32	320	2019-06-21	doing well	#NULL!	1	#NULL!	#NULL!	#NULL!	#NULL!	#NULL!	#NULL!	#NULL!		0	#NULL!	#NULL!	#NULL!	#NULL!	#NULL!	#NULL!	#NULL!	#NULL!	#NULL!	#NULL!	#NULL!	#NULL!	#NULL!	#NULL!	#NULL!	#NULL!	#NULL!	#NULL!	#NULL!	#NULL!	#NULL!	#NULL!	#NULL!	#NULL!	1	0	#NULL!	#NULL!	#NULL!	#NULL!		#NULL!	#NULL!	#NULL!	#NULL!
2019-06-24 12:12:31	320	2019-06-24	pretty good. red rash itchy	#NULL!	1	#NULL!	#NULL!	#NULL!	#NULL!	#NULL!	#NULL!	#NULL!		0	#NULL!	#NULL!	#NULL!	#NULL!	#NULL!	#NULL!	#NULL!	#NULL!	#NULL!	#NULL!	#NULL!	#NULL!	#NULL!	#NULL!	#NULL!	#NULL!	#NULL!	#NULL!	#NULL!	#NULL!	#NULL!	#NULL!	#NULL!	#NULL!	1	1	#NULL!	#NULL!	#NULL!	#NULL!		1	1	1	1
2020-01-15 17:35:26	321	2020-01-15	pretty good	#NULL!	1	#NULL!	#NULL!	#NULL!	#NULL!	#NULL!	#NULL!	#NULL!		0	#NULL!	#NULL!	#NULL!	#NULL!	#NULL!	#NULL!	#NULL!	#NULL!	#NULL!	#NULL!	#NULL!	#NULL!	#NULL!	#NULL!	#NULL!	#NULL!	#NULL!	#NULL!	#NULL!	#NULL!	#NULL!	#NULL!	#NULL!	#NULL!	1	2	#NULL!	#NULL!	#NULL!	#NULL!		1	1	1	1
2019-06-13 11:14:29	324	2019-06-13	good	#NULL!	1	#NULL!	#NULL!	#NULL!	#NULL!	#NULL!	#NULL!	1	lupron	0	#NULL!	#NULL!	#NULL!	#NULL!	#NULL!	#NULL!	#NULL!	#NULL!	#NULL!	#NULL!	#NULL!	#NULL!	#NULL!	#NULL!	#NULL!	#NULL!	#NULL!	#NULL!	#NULL!	#NULL!	#NULL!	#NULL!	#NULL!	#NULL!	1	0	#NULL!	#NULL!	#NULL!	#NULL!		#NULL!	#NULL!	#NULL!	#NULL!
2019-06-23 11:13:49	324	2019-06-23	good	#NULL!	1	#NULL!	#NULL!	#NULL!	#NULL!	#NULL!	#NULL!	1	zoladex	0	#NULL!	#NULL!	#NULL!	#NULL!	#NULL!	#NULL!	#NULL!	#NULL!	#NULL!	#NULL!	#NULL!	#NULL!	#NULL!	#NULL!	#NULL!	#NULL!	#NULL!	#NULL!	#NULL!	#NULL!	#NULL!	#NULL!	#NULL!	#NULL!	1	0	#NULL!	#NULL!	#NULL!	#NULL!		#NULL!	#NULL!	#NULL!	#NULL!
2019-06-24 18:51:30	324	2019-06-24	good	#NULL!	1	#NULL!	#NULL!	#NULL!	#NULL!	#NULL!	#NULL!	1	zoladex	0	#NULL!	#NULL!	#NULL!	#NULL!	#NULL!	#NULL!	#NULL!	#NULL!	#NULL!	#NULL!	#NULL!	#NULL!	#NULL!	#NULL!	#NULL!	#NULL!	#NULL!	#NULL!	#NULL!	#NULL!	#NULL!	#NULL!	#NULL!	#NULL!	1	0	#NULL!	#NULL!	#NULL!	#NULL!		#NULL!	#NULL!	#NULL!	#NULL!
2019-07-16 22:42:32	324	2019-07-16	good	#NULL!	1	#NULL!	#NULL!	#NULL!	#NULL!	#NULL!	#NULL!	1	zoladex	1	2	1	1	1	1	1	1	1	1	1	1	1	3	2	3	3	3	3	1	1	3	3	1	3	1	3	#NULL!	#NULL!	#NULL!	#NULL!		2	2	2	2
2019-07-15 14:05:43	325	2019-07-15	tired	#NULL!	1	#NULL!	#NULL!	#NULL!	#NULL!	#NULL!	#NULL!	#NULL!		0	#NULL!	#NULL!	#NULL!	#NULL!	#NULL!	#NULL!	#NULL!	#NULL!	#NULL!	#NULL!	#NULL!	#NULL!	#NULL!	#NULL!	#NULL!	#NULL!	#NULL!	#NULL!	#NULL!	#NULL!	#NULL!	#NULL!	#NULL!	#NULL!	1	3	#NULL!	#NULL!	#NULL!	#NULL!		2	2	1	2
2019-06-18 11:47:53	327	2019-06-18	excellent	#NULL!	1	#NULL!	#NULL!	#NULL!	#NULL!	#NULL!	#NULL!	#NULL!		0	#NULL!	#NULL!	#NULL!	#NULL!	#NULL!	#NULL!	#NULL!	#NULL!	#NULL!	#NULL!	#NULL!	#NULL!	#NULL!	#NULL!	#NULL!	#NULL!	#NULL!	#NULL!	#NULL!	#NULL!	#NULL!	#NULL!	#NULL!	#NULL!	1	0	#NULL!	#NULL!	#NULL!	#NULL!		#NULL!	#NULL!	#NULL!	#NULL!
2019-06-21 16:31:59	327	2019-06-21	very well	#NULL!	1	#NULL!	#NULL!	#NULL!	#NULL!	#NULL!	#NULL!	#NULL!		0	#NULL!	#NULL!	#NULL!	#NULL!	#NULL!	#NULL!	#NULL!	#NULL!	#NULL!	#NULL!	#NULL!	#NULL!	#NULL!	#NULL!	#NULL!	#NULL!	#NULL!	#NULL!	#NULL!	#NULL!	#NULL!	#NULL!	#NULL!	#NULL!	1	0	#NULL!	#NULL!	#NULL!	#NULL!		#NULL!	#NULL!	#NULL!	#NULL!
2019-06-24 13:21:54	327	2019-06-24	great	#NULL!	1	#NULL!	#NULL!	#NULL!	#NULL!	#NULL!	#NULL!	#NULL!		0	#NULL!	#NULL!	#NULL!	#NULL!	#NULL!	#NULL!	#NULL!	#NULL!	#NULL!	#NULL!	#NULL!	#NULL!	#NULL!	#NULL!	#NULL!	#NULL!	#NULL!	#NULL!	#NULL!	#NULL!	#NULL!	#NULL!	#NULL!	#NULL!	1	1	#NULL!	#NULL!	#NULL!	#NULL!		1	1	1	1
2019-08-12 13:29:34	328	2019-08-12	Sleepy not bad nothing to worry about.	#NULL!	1	#NULL!	#NULL!	#NULL!	#NULL!	#NULL!	#NULL!	#NULL!		1	1	1	1	1	1	1	1	1	1	1	1	1	3	1	3	3	3	2	3	1	1	1	1	1	1	0	#NULL!	#NULL!	#NULL!	#NULL!		#NULL!	#NULL!	#NULL!	#NULL!
2019-07-15 19:46:28	330	2019-07-15	Normal; at baseline	#NULL!	1	#NULL!	1	#NULL!	#NULL!	#NULL!	#NULL!	#NULL!		0	#NULL!	#NULL!	#NULL!	#NULL!	#NULL!	#NULL!	#NULL!	#NULL!	#NULL!	#NULL!	#NULL!	#NULL!	#NULL!	#NULL!	#NULL!	#NULL!	#NULL!	#NULL!	#NULL!	#NULL!	#NULL!	#NULL!	#NULL!	#NULL!	1	1	#NULL!	#NULL!	#NULL!	#NULL!		1	1	1	1
2019-07-19 12:57:26	331	2019-07-19	OK--extremely tired and burned from radiation	#NULL!	1	#NULL!	#NULL!	#NULL!	#NULL!	#NULL!	#NULL!	#NULL!		0	#NULL!	#NULL!	#NULL!	#NULL!	#NULL!	#NULL!	#NULL!	#NULL!	#NULL!	#NULL!	#NULL!	#NULL!	#NULL!	#NULL!	#NULL!	#NULL!	#NULL!	#NULL!	#NULL!	#NULL!	#NULL!	#NULL!	#NULL!	#NULL!	1	5	#NULL!	#NULL!	#NULL!	#NULL!		1	1	1	1
2019-06-20 12:24:20	332	2019-06-20	Good	#NULL!	1	#NULL!	#NULL!	#NULL!	1	1	#NULL!	#NULL!		0	#NULL!	#NULL!	#NULL!	#NULL!	#NULL!	#NULL!	#NULL!	#NULL!	#NULL!	#NULL!	#NULL!	#NULL!	#NULL!	#NULL!	#NULL!	#NULL!	#NULL!	#NULL!	#NULL!	#NULL!	#NULL!	#NULL!	#NULL!	#NULL!	1	0	#NULL!	#NULL!	#NULL!	#NULL!		#NULL!	#NULL!	#NULL!	#NULL!
2019-07-20 06:10:33	332	2019-07-20	Fairly well	#NULL!	1	#NULL!	#NULL!	#NULL!	1	1	#NULL!	#NULL!		0	#NULL!	#NULL!	#NULL!	#NULL!	#NULL!	#NULL!	#NULL!	#NULL!	#NULL!	#NULL!	#NULL!	#NULL!	#NULL!	#NULL!	#NULL!	#NULL!	#NULL!	#NULL!	#NULL!	#NULL!	#NULL!	#NULL!	#NULL!	#NULL!	1	0	#NULL!	#NULL!	#NULL!	#NULL!		#NULL!	#NULL!	#NULL!	#NULL!
2019-11-01 10:32:36	333	2019-11-01	good	#NULL!	1	#NULL!	#NULL!	#NULL!	#NULL!	#NULL!	#NULL!	#NULL!		0	#NULL!	#NULL!	#NULL!	#NULL!	#NULL!	#NULL!	#NULL!	#NULL!	#NULL!	#NULL!	#NULL!	#NULL!	#NULL!	#NULL!	#NULL!	#NULL!	#NULL!	#NULL!	#NULL!	#NULL!	#NULL!	#NULL!	#NULL!	#NULL!	1	2	#NULL!	#NULL!	#NULL!	#NULL!		1	1	1	1
2019-08-13 13:54:30	334	2019-08-13	okay, everyting is about the same. Just feeling constipated	#NULL!	1	#NULL!	#NULL!	#NULL!	#NULL!	#NULL!	#NULL!	#NULL!		0	#NULL!	#NULL!	#NULL!	#NULL!	#NULL!	#NULL!	#NULL!	#NULL!	#NULL!	#NULL!	#NULL!	#NULL!	#NULL!	#NULL!	#NULL!	#NULL!	#NULL!	#NULL!	#NULL!	#NULL!	#NULL!	#NULL!	#NULL!	#NULL!	2	7	#NULL!	#NULL!	#NULL!	#NULL!		1	2	2	2
2019-08-20 13:50:43	334	2019-08-20	Good, 11/20 radiation treatments seatbelt is most annoying	#NULL!	1	#NULL!	#NULL!	#NULL!	#NULL!	#NULL!	#NULL!	#NULL!		0	#NULL!	#NULL!	#NULL!	#NULL!	#NULL!	#NULL!	#NULL!	#NULL!	#NULL!	#NULL!	#NULL!	#NULL!	#NULL!	#NULL!	#NULL!	#NULL!	#NULL!	#NULL!	#NULL!	#NULL!	#NULL!	#NULL!	#NULL!	#NULL!	1	0	#NULL!	#NULL!	#NULL!	#NULL!		#NULL!	#NULL!	#NULL!	#NULL!
2019-08-26 12:15:24	334	2019-08-26	okay but can't get any spit	#NULL!	1	#NULL!	#NULL!	#NULL!	#NULL!	#NULL!	#NULL!	#NULL!		0	#NULL!	#NULL!	#NULL!	#NULL!	#NULL!	#NULL!	#NULL!	#NULL!	#NULL!	#NULL!	#NULL!	#NULL!	#NULL!	#NULL!	#NULL!	#NULL!	#NULL!	#NULL!	#NULL!	#NULL!	#NULL!	#NULL!	#NULL!	#NULL!	1	5	#NULL!	#NULL!	#NULL!	#NULL!		1	1	1	1
2019-08-23 07:13:01	336	2019-08-23	Good	#NULL!	1	#NULL!	#NULL!	#NULL!	#NULL!	#NULL!	#NULL!	#NULL!		0	#NULL!	#NULL!	#NULL!	#NULL!	#NULL!	#NULL!	#NULL!	#NULL!	#NULL!	#NULL!	#NULL!	#NULL!	#NULL!	#NULL!	#NULL!	#NULL!	#NULL!	#NULL!	#NULL!	#NULL!	#NULL!	#NULL!	#NULL!	#NULL!	1	0	#NULL!	#NULL!	#NULL!	#NULL!		#NULL!	#NULL!	#NULL!	#NULL!
2019-08-30 12:07:24	336	2019-08-26	Ok	1	1	#NULL!	#NULL!	#NULL!	#NULL!	#NULL!	#NULL!	#NULL!		1	1	1	1	1	1	1	3	3	1	1	1	1	1	1	1	1	3	3	3	1	1	1	1	1	1	0	#NULL!	#NULL!	#NULL!	#NULL!		#NULL!	#NULL!	#NULL!	#NULL!
2019-08-12 13:05:00	337	2019-08-12	Good, a little more tired	#NULL!	1	#NULL!	#NULL!	#NULL!	#NULL!	#NULL!	#NULL!	#NULL!		1	1	1	1	1	#NULL!	#NULL!	#NULL!	#NULL!	#NULL!	#NULL!	#NULL!	#NULL!	2	2	2	2	4	4	1	1	1	1	1	1	1	0	#NULL!	#NULL!	#NULL!	#NULL!		#NULL!	#NULL!	#NULL!	#NULL!
2019-08-12 15:17:41	338	2019-08-12	Alright	#NULL!	1	#NULL!	#NULL!	#NULL!	#NULL!	#NULL!	#NULL!	#NULL!		1	2	2	2	2	1	3	3	3	1	1	1	1	4	4	4	4	2	1	1	1	3	3	3	3	2	7	#NULL!	#NULL!	#NULL!	#NULL!		2	2	2	2
2019-08-21 10:53:11	338	2019-08-21	Not good	#NULL!	1	#NULL!	#NULL!	#NULL!	#NULL!	#NULL!	#NULL!	#NULL!		1	4	4	4	4	2	2	2	5	2	2	2	2	5	5	5	5	2	1	2	2	4	4	4	4	1	6	#NULL!	#NULL!	#NULL!	#NULL!		3	3	3	3
2019-08-26 14:50:04	338	2019-08-26	Alright	#NULL!	1	#NULL!	#NULL!	#NULL!	#NULL!	#NULL!	#NULL!	#NULL!		0	#NULL!	#NULL!	#NULL!	#NULL!	#NULL!	#NULL!	#NULL!	#NULL!	#NULL!	#NULL!	#NULL!	#NULL!	#NULL!	#NULL!	#NULL!	#NULL!	#NULL!	#NULL!	#NULL!	#NULL!	#NULL!	#NULL!	#NULL!	#NULL!	2	8	#NULL!	#NULL!	#NULL!	#NULL!		4	4	4	4
2019-07-22 16:36:13	339	2019-07-22	Ok	#NULL!	1	#NULL!	#NULL!	#NULL!	#NULL!	#NULL!	#NULL!	#NULL!		0	#NULL!	#NULL!	#NULL!	#NULL!	#NULL!	#NULL!	#NULL!	#NULL!	#NULL!	#NULL!	#NULL!	#NULL!	#NULL!	#NULL!	#NULL!	#NULL!	#NULL!	#NULL!	#NULL!	#NULL!	#NULL!	#NULL!	#NULL!	#NULL!	1	0	#NULL!	#NULL!	#NULL!	#NULL!		#NULL!	#NULL!	#NULL!	#NULL!
2019-09-24 14:48:07	339	2019-09-24	awful	#NULL!	1	1	#NULL!	#NULL!	#NULL!	#NULL!	#NULL!	#NULL!		1	2	2	2	1	2	3	2	2	1	2	3	3	4	3	4	5	3	1	1	3	2	1	2	2	1	6	#NULL!	#NULL!	#NULL!	#NULL!		2	2	2	3
2019-09-30 12:24:45	339	2019-09-30	Terrible	#NULL!	1	1	#NULL!	#NULL!	#NULL!	#NULL!	#NULL!	#NULL!		1	3	3	2	2	2	3	3	2	3	3	4	3	4	4	4	4	3	1	3	3	3	4	3	3	2	7	#NULL!	#NULL!	#NULL!	#NULL!		4	4	4	4
2019-08-12 13:03:40	342	2019-08-12	Well	#NULL!	1	#NULL!	#NULL!	#NULL!	#NULL!	#NULL!	#NULL!	#NULL!		0	#NULL!	#NULL!	#NULL!	#NULL!	#NULL!	#NULL!	#NULL!	#NULL!	#NULL!	#NULL!	#NULL!	#NULL!	#NULL!	#NULL!	#NULL!	#NULL!	#NULL!	#NULL!	#NULL!	#NULL!	#NULL!	#NULL!	#NULL!	#NULL!	1	1	#NULL!	#NULL!	#NULL!	#NULL!		1	1	1	1
2019-08-20 20:56:21	342	2019-08-20	Tired and a little sore	#NULL!	1	#NULL!	#NULL!	#NULL!	#NULL!	#NULL!	#NULL!	#NULL!		1	2	2	2	2	3	3	2	3	1	2	3	2	3	2	3	3	3	2	2	2	3	3	3	3	1	3	#NULL!	#NULL!	#NULL!	#NULL!		3	2	2	2
2019-08-26 22:40:44	342	2019-08-26	Some fatigue this week, plus skin a little “sunburned”.	#NULL!	1	#NULL!	#NULL!	#NULL!	#NULL!	#NULL!	#NULL!	#NULL!		1	2	2	2	2	3	2	2	3	1	2	3	1	4	3	3	3	3	3	2	2	3	3	3	3	1	2	#NULL!	#NULL!	#NULL!	#NULL!		2	1	1	2
2019-08-12 11:39:00	343	2019-08-12	tired	#NULL!	1	#NULL!	#NULL!	#NULL!	#NULL!	#NULL!	#NULL!	#NULL!		1	2	1	1	1	1	2	3	1	3	3	3	3	4	3	4	4	3	3	4	4	2	2	2	3	1	1	#NULL!	#NULL!	#NULL!	#NULL!		1	1	1	1
2019-08-22 11:04:06	345	2019-08-22	okay	#NULL!	1	#NULL!	#NULL!	#NULL!	#NULL!	#NULL!	#NULL!	#NULL!		0	#NULL!	#NULL!	#NULL!	#NULL!	#NULL!	#NULL!	#NULL!	#NULL!	#NULL!	#NULL!	#NULL!	#NULL!	#NULL!	#NULL!	#NULL!	#NULL!	#NULL!	#NULL!	#NULL!	#NULL!	#NULL!	#NULL!	#NULL!	#NULL!	1	0	#NULL!	#NULL!	#NULL!	#NULL!		#NULL!	#NULL!	#NULL!	#NULL!
2019-08-27 11:05:55	345	2019-08-27	17 radation treatment , have sore throat and thrush, fatigue	#NULL!	1	#NULL!	#NULL!	#NULL!	#NULL!	#NULL!	#NULL!	#NULL!		0	#NULL!	#NULL!	#NULL!	#NULL!	#NULL!	#NULL!	#NULL!	#NULL!	#NULL!	#NULL!	#NULL!	#NULL!	#NULL!	#NULL!	#NULL!	#NULL!	#NULL!	#NULL!	#NULL!	#NULL!	#NULL!	#NULL!	#NULL!	#NULL!	1	6	#NULL!	#NULL!	#NULL!	#NULL!		3	1	1	1
2019-09-09 14:19:30	345	2019-09-09	pretty good	#NULL!	1	#NULL!	#NULL!	#NULL!	#NULL!	#NULL!	#NULL!	#NULL!		0	#NULL!	#NULL!	#NULL!	#NULL!	#NULL!	#NULL!	#NULL!	#NULL!	#NULL!	#NULL!	#NULL!	#NULL!	#NULL!	#NULL!	#NULL!	#NULL!	#NULL!	#NULL!	#NULL!	#NULL!	#NULL!	#NULL!	#NULL!	#NULL!	1	4	#NULL!	#NULL!	#NULL!	#NULL!		2	2	2	2
2019-08-12 12:46:02	348	2019-08-12	Started radiation 8/7/19 doing ok, coming along	#NULL!	1	#NULL!	#NULL!	#NULL!	#NULL!	#NULL!	#NULL!	#NULL!		1	1	1	1	1	#NULL!	#NULL!	#NULL!	#NULL!	#NULL!	#NULL!	#NULL!	#NULL!	3	2	3	2	5	4	1	1	1	1	1	1	1	0	#NULL!	#NULL!	#NULL!	#NULL!		#NULL!	#NULL!	#NULL!	#NULL!
2019-09-25 14:22:46	348	2019-09-25	Fine	#NULL!	1	#NULL!	#NULL!	#NULL!	#NULL!	#NULL!	#NULL!	#NULL!		0	#NULL!	#NULL!	#NULL!	#NULL!	#NULL!	#NULL!	#NULL!	#NULL!	#NULL!	#NULL!	#NULL!	#NULL!	#NULL!	#NULL!	#NULL!	#NULL!	#NULL!	#NULL!	#NULL!	#NULL!	#NULL!	#NULL!	#NULL!	#NULL!	1	0	#NULL!	#NULL!	#NULL!	#NULL!		#NULL!	#NULL!	#NULL!	#NULL!
2019-10-22 14:41:47	348	2019-10-22	good	#NULL!	1	#NULL!	#NULL!	#NULL!	#NULL!	#NULL!	#NULL!	#NULL!		0	#NULL!	#NULL!	#NULL!	#NULL!	#NULL!	#NULL!	#NULL!	#NULL!	#NULL!	#NULL!	#NULL!	#NULL!	#NULL!	#NULL!	#NULL!	#NULL!	#NULL!	#NULL!	#NULL!	#NULL!	#NULL!	#NULL!	#NULL!	#NULL!	1	4	#NULL!	#NULL!	#NULL!	#NULL!		1	1	3	1
2019-07-24 15:19:11	349	2019-07-24	okay. started treatment	#NULL!	1	#NULL!	#NULL!	#NULL!	#NULL!	#NULL!	#NULL!	#NULL!		0	#NULL!	#NULL!	#NULL!	#NULL!	#NULL!	#NULL!	#NULL!	#NULL!	#NULL!	#NULL!	#NULL!	#NULL!	#NULL!	#NULL!	#NULL!	#NULL!	#NULL!	#NULL!	#NULL!	#NULL!	#NULL!	#NULL!	#NULL!	#NULL!	1	4	#NULL!	#NULL!	#NULL!	#NULL!		2	2	2	2
2019-08-12 15:13:56	349	2019-08-12	Fatigue is setting in last one today! Everything looks good	#NULL!	1	#NULL!	#NULL!	#NULL!	#NULL!	#NULL!	#NULL!	#NULL!		1	5	1	2	2	1	3	1	2	2	2	3	3	4	3	3	3	2	2	4	3	4	4	3	4	2	7	#NULL!	#NULL!	#NULL!	#NULL!		4	4	3	4
2019-08-12 12:58:22	351	2019-08-12	Good	#NULL!	1	#NULL!	#NULL!	#NULL!	#NULL!	#NULL!	#NULL!	#NULL!		0	#NULL!	#NULL!	#NULL!	#NULL!	#NULL!	#NULL!	#NULL!	#NULL!	#NULL!	#NULL!	#NULL!	#NULL!	#NULL!	#NULL!	#NULL!	#NULL!	#NULL!	#NULL!	#NULL!	#NULL!	#NULL!	#NULL!	#NULL!	#NULL!	1	0	#NULL!	#NULL!	#NULL!	#NULL!		#NULL!	#NULL!	#NULL!	#NULL!
2019-08-20 08:26:14	351	2019-08-20	Good	#NULL!	1	#NULL!	#NULL!	#NULL!	#NULL!	#NULL!	#NULL!	#NULL!		0	#NULL!	#NULL!	#NULL!	#NULL!	#NULL!	#NULL!	#NULL!	#NULL!	#NULL!	#NULL!	#NULL!	#NULL!	#NULL!	#NULL!	#NULL!	#NULL!	#NULL!	#NULL!	#NULL!	#NULL!	#NULL!	#NULL!	#NULL!	#NULL!	1	0	#NULL!	#NULL!	#NULL!	#NULL!		#NULL!	#NULL!	#NULL!	#NULL!
2019-08-26 14:19:21	351	2019-08-26	Good	#NULL!	1	#NULL!	#NULL!	#NULL!	#NULL!	#NULL!	#NULL!	#NULL!		0	#NULL!	#NULL!	#NULL!	#NULL!	#NULL!	#NULL!	#NULL!	#NULL!	#NULL!	#NULL!	#NULL!	#NULL!	#NULL!	#NULL!	#NULL!	#NULL!	#NULL!	#NULL!	#NULL!	#NULL!	#NULL!	#NULL!	#NULL!	#NULL!	1	0	#NULL!	#NULL!	#NULL!	#NULL!		#NULL!	#NULL!	#NULL!	#NULL!
2019-09-10 11:10:12	354	2019-09-10	okay 1st week of rdation, but now pain , meds for pain	#NULL!	1	#NULL!	#NULL!	#NULL!	#NULL!	#NULL!	#NULL!	#NULL!		0	#NULL!	#NULL!	#NULL!	#NULL!	#NULL!	#NULL!	#NULL!	#NULL!	#NULL!	#NULL!	#NULL!	#NULL!	#NULL!	#NULL!	#NULL!	#NULL!	#NULL!	#NULL!	#NULL!	#NULL!	#NULL!	#NULL!	#NULL!	#NULL!	1	3	#NULL!	#NULL!	#NULL!	#NULL!		1	1	1	2
2019-09-27 16:08:22	354	2019-09-27	OK--skin reaction to radiation	#NULL!	1	#NULL!	#NULL!	#NULL!	#NULL!	#NULL!	#NULL!	#NULL!		0	#NULL!	#NULL!	#NULL!	#NULL!	#NULL!	#NULL!	#NULL!	#NULL!	#NULL!	#NULL!	#NULL!	#NULL!	#NULL!	#NULL!	#NULL!	#NULL!	#NULL!	#NULL!	#NULL!	#NULL!	#NULL!	#NULL!	#NULL!	#NULL!	1	2	#NULL!	#NULL!	#NULL!	#NULL!		1	1	1	1
2019-10-01 12:28:50	358	2019-10-01	okay	#NULL!	1	#NULL!	#NULL!	#NULL!	#NULL!	#NULL!	#NULL!	#NULL!		1	3	3	3	3	1	2	1	1	1	1	2	1	4	4	4	4	4	2	2	1	3	3	3	2	1	0	#NULL!	#NULL!	#NULL!	#NULL!		#NULL!	#NULL!	#NULL!	#NULL!
2019-10-17 11:37:29	358	2019-10-17	In some pain, nauseous	#NULL!	1	#NULL!	#NULL!	#NULL!	#NULL!	#NULL!	#NULL!	#NULL!		1	1	3	2	2	1	1	2	1	1	1	1	1	3	3	3	3	3	1	2	1	3	3	2	3	1	4	#NULL!	#NULL!	#NULL!	#NULL!		2	2	2	2
2020-02-28 21:23:47	359	2020-02-28	good	#NULL!	1	#NULL!	#NULL!	#NULL!	#NULL!	#NULL!	#NULL!	#NULL!		0	#NULL!	#NULL!	#NULL!	#NULL!	#NULL!	#NULL!	#NULL!	#NULL!	#NULL!	#NULL!	#NULL!	#NULL!	#NULL!	#NULL!	#NULL!	#NULL!	#NULL!	#NULL!	#NULL!	#NULL!	#NULL!	#NULL!	#NULL!	#NULL!	1	0	#NULL!	#NULL!	#NULL!	#NULL!		#NULL!	#NULL!	#NULL!	#NULL!
2020-03-11 10:19:58	359	2020-03-11	good	#NULL!	1	#NULL!	#NULL!	#NULL!	#NULL!	#NULL!	#NULL!	#NULL!		0	#NULL!	#NULL!	#NULL!	#NULL!	#NULL!	#NULL!	#NULL!	#NULL!	#NULL!	#NULL!	#NULL!	#NULL!	#NULL!	#NULL!	#NULL!	#NULL!	#NULL!	#NULL!	#NULL!	#NULL!	#NULL!	#NULL!	#NULL!	#NULL!	1	0	#NULL!	#NULL!	#NULL!	#NULL!		#NULL!	#NULL!	#NULL!	#NULL!
2020-03-20 23:14:17	359	2020-03-19	good	#NULL!	1	#NULL!	#NULL!	#NULL!	#NULL!	#NULL!	#NULL!	#NULL!		0	#NULL!	#NULL!	#NULL!	#NULL!	#NULL!	#NULL!	#NULL!	#NULL!	#NULL!	#NULL!	#NULL!	#NULL!	#NULL!	#NULL!	#NULL!	#NULL!	#NULL!	#NULL!	#NULL!	#NULL!	#NULL!	#NULL!	#NULL!	#NULL!	1	0	#NULL!	#NULL!	#NULL!	#NULL!		#NULL!	#NULL!	#NULL!	#NULL!
2020-03-24 20:24:46	359	2020-03-24	good	#NULL!	1	#NULL!	#NULL!	#NULL!	#NULL!	#NULL!	#NULL!	#NULL!		0	#NULL!	#NULL!	#NULL!	#NULL!	#NULL!	#NULL!	#NULL!	#NULL!	#NULL!	#NULL!	#NULL!	#NULL!	#NULL!	#NULL!	#NULL!	#NULL!	#NULL!	#NULL!	#NULL!	#NULL!	#NULL!	#NULL!	#NULL!	#NULL!	1	0	#NULL!	#NULL!	#NULL!	#NULL!		#NULL!	#NULL!	#NULL!	#NULL!
2019-10-07 12:11:48	360	2019-10-07	Good	#NULL!	1	#NULL!	#NULL!	#NULL!	#NULL!	#NULL!	#NULL!	#NULL!		0	#NULL!	#NULL!	#NULL!	#NULL!	#NULL!	#NULL!	#NULL!	#NULL!	#NULL!	#NULL!	#NULL!	#NULL!	#NULL!	#NULL!	#NULL!	#NULL!	#NULL!	#NULL!	#NULL!	#NULL!	#NULL!	#NULL!	#NULL!	#NULL!	1	2	#NULL!	#NULL!	#NULL!	#NULL!		1	1	1	1
2019-10-15 13:45:51	360	2019-10-15	Tired	#NULL!	1	#NULL!	#NULL!	#NULL!	#NULL!	#NULL!	#NULL!	#NULL!		0	#NULL!	#NULL!	#NULL!	#NULL!	#NULL!	#NULL!	#NULL!	#NULL!	#NULL!	#NULL!	#NULL!	#NULL!	#NULL!	#NULL!	#NULL!	#NULL!	#NULL!	#NULL!	#NULL!	#NULL!	#NULL!	#NULL!	#NULL!	#NULL!	1	3	#NULL!	#NULL!	#NULL!	#NULL!		1	1	1	2
2019-10-23 13:10:32	360	2019-10-23	Tired and sore	#NULL!	1	#NULL!	#NULL!	#NULL!	#NULL!	#NULL!	#NULL!	#NULL!		0	#NULL!	#NULL!	#NULL!	#NULL!	#NULL!	#NULL!	#NULL!	#NULL!	#NULL!	#NULL!	#NULL!	#NULL!	#NULL!	#NULL!	#NULL!	#NULL!	#NULL!	#NULL!	#NULL!	#NULL!	#NULL!	#NULL!	#NULL!	#NULL!	1	3	#NULL!	#NULL!	#NULL!	#NULL!		2	2	1	2
2019-11-06 11:15:54	360	2019-11-06	Tired	#NULL!	1	#NULL!	#NULL!	#NULL!	#NULL!	#NULL!	#NULL!	#NULL!		0	#NULL!	#NULL!	#NULL!	#NULL!	#NULL!	#NULL!	#NULL!	#NULL!	#NULL!	#NULL!	#NULL!	#NULL!	#NULL!	#NULL!	#NULL!	#NULL!	#NULL!	#NULL!	#NULL!	#NULL!	#NULL!	#NULL!	#NULL!	#NULL!	1	3	#NULL!	#NULL!	#NULL!	#NULL!		2	2	1	2
2019-11-14 10:53:23	360	2019-11-14	Good	#NULL!	1	#NULL!	#NULL!	#NULL!	#NULL!	#NULL!	#NULL!	#NULL!		0	#NULL!	#NULL!	#NULL!	#NULL!	#NULL!	#NULL!	#NULL!	#NULL!	#NULL!	#NULL!	#NULL!	#NULL!	#NULL!	#NULL!	#NULL!	#NULL!	#NULL!	#NULL!	#NULL!	#NULL!	#NULL!	#NULL!	#NULL!	#NULL!	1	3	#NULL!	#NULL!	#NULL!	#NULL!		2	2	1	2
2019-10-23 10:19:58	361	2019-10-23	achy pain tired nauseated	#NULL!	1	1	#NULL!	#NULL!	#NULL!	#NULL!	#NULL!	#NULL!		1	3	3	3	3	3	3	3	3	2	2	2	2	4	4	4	4	3	2	4	2	4	4	3	3	2	7	#NULL!	#NULL!	#NULL!	#NULL!		4	4	4	4
2019-09-11 16:49:55	363	2019-09-11	tired	#NULL!	1	#NULL!	#NULL!	#NULL!	#NULL!	#NULL!	#NULL!	#NULL!		0	#NULL!	#NULL!	#NULL!	#NULL!	#NULL!	#NULL!	#NULL!	#NULL!	#NULL!	#NULL!	#NULL!	#NULL!	#NULL!	#NULL!	#NULL!	#NULL!	#NULL!	#NULL!	#NULL!	#NULL!	#NULL!	#NULL!	#NULL!	#NULL!	1	0	#NULL!	#NULL!	#NULL!	#NULL!		#NULL!	#NULL!	#NULL!	#NULL!
2019-09-17 16:19:26	363	2019-09-17	okay	#NULL!	1	#NULL!	#NULL!	#NULL!	#NULL!	#NULL!	#NULL!	#NULL!		0	#NULL!	#NULL!	#NULL!	#NULL!	#NULL!	#NULL!	#NULL!	#NULL!	#NULL!	#NULL!	#NULL!	#NULL!	#NULL!	#NULL!	#NULL!	#NULL!	#NULL!	#NULL!	#NULL!	#NULL!	#NULL!	#NULL!	#NULL!	#NULL!	1	0	#NULL!	#NULL!	#NULL!	#NULL!		#NULL!	#NULL!	#NULL!	#NULL!
2019-09-17 11:32:32	364	2019-09-17	okay	#NULL!	1	#NULL!	#NULL!	#NULL!	#NULL!	#NULL!	#NULL!	#NULL!		0	#NULL!	#NULL!	#NULL!	#NULL!	#NULL!	#NULL!	#NULL!	#NULL!	#NULL!	#NULL!	#NULL!	#NULL!	#NULL!	#NULL!	#NULL!	#NULL!	#NULL!	#NULL!	#NULL!	#NULL!	#NULL!	#NULL!	#NULL!	#NULL!	1	0	#NULL!	#NULL!	#NULL!	#NULL!		#NULL!	#NULL!	#NULL!	#NULL!
2019-09-27 08:43:10	364	2019-09-27	okay	#NULL!	1	#NULL!	#NULL!	#NULL!	#NULL!	#NULL!	#NULL!	#NULL!		0	#NULL!	#NULL!	#NULL!	#NULL!	#NULL!	#NULL!	#NULL!	#NULL!	#NULL!	#NULL!	#NULL!	#NULL!	#NULL!	#NULL!	#NULL!	#NULL!	#NULL!	#NULL!	#NULL!	#NULL!	#NULL!	#NULL!	#NULL!	#NULL!	1	0	#NULL!	#NULL!	#NULL!	#NULL!		#NULL!	#NULL!	#NULL!	#NULL!
2019-10-09 15:20:49	364	2019-10-09	tired	#NULL!	1	#NULL!	#NULL!	#NULL!	#NULL!	#NULL!	#NULL!	#NULL!		0	#NULL!	#NULL!	#NULL!	#NULL!	#NULL!	#NULL!	#NULL!	#NULL!	#NULL!	#NULL!	#NULL!	#NULL!	#NULL!	#NULL!	#NULL!	#NULL!	#NULL!	#NULL!	#NULL!	#NULL!	#NULL!	#NULL!	#NULL!	#NULL!	1	0	#NULL!	#NULL!	#NULL!	#NULL!		#NULL!	#NULL!	#NULL!	#NULL!
2020-02-19 14:25:30	365	2020-02-19	Just fine--nothing has changed.	#NULL!	1	#NULL!	#NULL!	#NULL!	#NULL!	#NULL!	#NULL!	#NULL!		0	#NULL!	#NULL!	#NULL!	#NULL!	#NULL!	#NULL!	#NULL!	#NULL!	#NULL!	#NULL!	#NULL!	#NULL!	#NULL!	#NULL!	#NULL!	#NULL!	#NULL!	#NULL!	#NULL!	#NULL!	#NULL!	#NULL!	#NULL!	#NULL!	1	0	#NULL!	#NULL!	#NULL!	#NULL!		#NULL!	#NULL!	#NULL!	#NULL!
2020-03-02 12:54:29	365	2020-03-02	Fine, no problem	#NULL!	1	#NULL!	#NULL!	#NULL!	#NULL!	#NULL!	#NULL!	#NULL!		0	#NULL!	#NULL!	#NULL!	#NULL!	#NULL!	#NULL!	#NULL!	#NULL!	#NULL!	#NULL!	#NULL!	#NULL!	#NULL!	#NULL!	#NULL!	#NULL!	#NULL!	#NULL!	#NULL!	#NULL!	#NULL!	#NULL!	#NULL!	#NULL!	1	0	#NULL!	#NULL!	#NULL!	#NULL!		#NULL!	#NULL!	#NULL!	#NULL!
2019-09-19 17:19:19	366	2019-09-19	not too bad	#NULL!	1	#NULL!	#NULL!	#NULL!	#NULL!	#NULL!	1	#NULL!		0	#NULL!	#NULL!	#NULL!	#NULL!	#NULL!	#NULL!	#NULL!	#NULL!	#NULL!	#NULL!	#NULL!	#NULL!	#NULL!	#NULL!	#NULL!	#NULL!	#NULL!	#NULL!	#NULL!	#NULL!	#NULL!	#NULL!	#NULL!	#NULL!	2	8	#NULL!	#NULL!	#NULL!	#NULL!		2	2	2	2
2019-09-24 13:38:36	366	2019-09-24	had some bad days	#NULL!	1	1	#NULL!	#NULL!	#NULL!	#NULL!	#NULL!	#NULL!		1	2	4	3	2	1	3	2	3	2	2	3	2	4	4	4	4	4	3	1	1	3	2	3	3	2	8	#NULL!	#NULL!	#NULL!	#NULL!		4	3	3	3
2020-03-16 16:46:40	369	2020-03-16	good	#NULL!	1	#NULL!	#NULL!	#NULL!	#NULL!	#NULL!	#NULL!	#NULL!		0	#NULL!	#NULL!	#NULL!	#NULL!	#NULL!	#NULL!	#NULL!	#NULL!	#NULL!	#NULL!	#NULL!	#NULL!	#NULL!	#NULL!	#NULL!	#NULL!	#NULL!	#NULL!	#NULL!	#NULL!	#NULL!	#NULL!	#NULL!	#NULL!	1	0	#NULL!	#NULL!	#NULL!	#NULL!		#NULL!	#NULL!	#NULL!	#NULL!
2020-04-06 12:01:18	369	2020-04-06	good	#NULL!	1	#NULL!	#NULL!	#NULL!	#NULL!	#NULL!	#NULL!	#NULL!		0	#NULL!	#NULL!	#NULL!	#NULL!	#NULL!	#NULL!	#NULL!	#NULL!	#NULL!	#NULL!	#NULL!	#NULL!	#NULL!	#NULL!	#NULL!	#NULL!	#NULL!	#NULL!	#NULL!	#NULL!	#NULL!	#NULL!	#NULL!	#NULL!	1	0	#NULL!	#NULL!	#NULL!	#NULL!		#NULL!	#NULL!	#NULL!	#NULL!
2019-10-08 12:11:16	370	2019-10-08	pretty good	#NULL!	1	#NULL!	#NULL!	#NULL!	#NULL!	#NULL!	#NULL!	#NULL!		0	#NULL!	#NULL!	#NULL!	#NULL!	#NULL!	#NULL!	#NULL!	#NULL!	#NULL!	#NULL!	#NULL!	#NULL!	#NULL!	#NULL!	#NULL!	#NULL!	#NULL!	#NULL!	#NULL!	#NULL!	#NULL!	#NULL!	#NULL!	#NULL!	1	3	#NULL!	#NULL!	#NULL!	#NULL!		1	1	1	1
2019-10-15 12:14:07	370	2019-10-15	good	#NULL!	1	#NULL!	#NULL!	#NULL!	#NULL!	#NULL!	#NULL!	#NULL!		0	#NULL!	#NULL!	#NULL!	#NULL!	#NULL!	#NULL!	#NULL!	#NULL!	#NULL!	#NULL!	#NULL!	#NULL!	#NULL!	#NULL!	#NULL!	#NULL!	#NULL!	#NULL!	#NULL!	#NULL!	#NULL!	#NULL!	#NULL!	#NULL!	1	4	#NULL!	#NULL!	#NULL!	#NULL!		1	1	1	1
2019-10-29 14:40:20	370	2019-10-29	pretty good	#NULL!	1	#NULL!	#NULL!	#NULL!	#NULL!	#NULL!	#NULL!	#NULL!		0	#NULL!	#NULL!	#NULL!	#NULL!	#NULL!	#NULL!	#NULL!	#NULL!	#NULL!	#NULL!	#NULL!	#NULL!	#NULL!	#NULL!	#NULL!	#NULL!	#NULL!	#NULL!	#NULL!	#NULL!	#NULL!	#NULL!	#NULL!	#NULL!	1	4	#NULL!	#NULL!	#NULL!	#NULL!		1	1	3	3
2019-10-07 18:56:43	371	2019-10-07	Tired.	#NULL!	1	#NULL!	#NULL!	1	#NULL!	#NULL!	#NULL!	#NULL!		1	1	2	1	1	3	4	4	3	2	2	4	2	3	3	4	4	3	2	5	2	2	2	3	2	1	3	#NULL!	#NULL!	#NULL!	#NULL!		1	1	1	1
2019-11-06 06:48:04	374	2019-11-06	Fine	#NULL!	1	#NULL!	#NULL!	#NULL!	#NULL!	#NULL!	#NULL!	#NULL!		0	#NULL!	#NULL!	#NULL!	#NULL!	#NULL!	#NULL!	#NULL!	#NULL!	#NULL!	#NULL!	#NULL!	#NULL!	#NULL!	#NULL!	#NULL!	#NULL!	#NULL!	#NULL!	#NULL!	#NULL!	#NULL!	#NULL!	#NULL!	#NULL!	1	0	#NULL!	#NULL!	#NULL!	#NULL!		#NULL!	#NULL!	#NULL!	#NULL!
2019-11-14 12:53:14	374	2019-11-14	I feel fine.	#NULL!	1	#NULL!	#NULL!	#NULL!	#NULL!	#NULL!	#NULL!	#NULL!		0	#NULL!	#NULL!	#NULL!	#NULL!	#NULL!	#NULL!	#NULL!	#NULL!	#NULL!	#NULL!	#NULL!	#NULL!	#NULL!	#NULL!	#NULL!	#NULL!	#NULL!	#NULL!	#NULL!	#NULL!	#NULL!	#NULL!	#NULL!	#NULL!	1	0	#NULL!	#NULL!	#NULL!	#NULL!		#NULL!	#NULL!	#NULL!	#NULL!
2020-05-13 09:19:11	377	2020-05-12	Tired	#NULL!	1	#NULL!	#NULL!	#NULL!	#NULL!	#NULL!	#NULL!	#NULL!		0	#NULL!	#NULL!	#NULL!	#NULL!	#NULL!	#NULL!	#NULL!	#NULL!	#NULL!	#NULL!	#NULL!	#NULL!	#NULL!	#NULL!	#NULL!	#NULL!	#NULL!	#NULL!	#NULL!	#NULL!	#NULL!	#NULL!	#NULL!	#NULL!	1	6	#NULL!	#NULL!	#NULL!	#NULL!		3	3	3	3
2020-05-21 13:40:32	377	2020-05-21	Tired abdominal pain	#NULL!	1	#NULL!	#NULL!	#NULL!	#NULL!	#NULL!	#NULL!	#NULL!		0	#NULL!	#NULL!	#NULL!	#NULL!	#NULL!	#NULL!	#NULL!	#NULL!	#NULL!	#NULL!	#NULL!	#NULL!	#NULL!	#NULL!	#NULL!	#NULL!	#NULL!	#NULL!	#NULL!	#NULL!	#NULL!	#NULL!	#NULL!	#NULL!	1	6	#NULL!	#NULL!	#NULL!	#NULL!		4	4	4	4
2020-05-27 21:39:20	377	2020-05-26	Tired. Belly pain	#NULL!	1	#NULL!	#NULL!	#NULL!	#NULL!	#NULL!	#NULL!	#NULL!		0	#NULL!	#NULL!	#NULL!	#NULL!	#NULL!	#NULL!	#NULL!	#NULL!	#NULL!	#NULL!	#NULL!	#NULL!	#NULL!	#NULL!	#NULL!	#NULL!	#NULL!	#NULL!	#NULL!	#NULL!	#NULL!	#NULL!	#NULL!	#NULL!	1	6	#NULL!	#NULL!	#NULL!	#NULL!		4	4	4	4
2020-06-10 08:56:25	377	2020-06-10	Tired,uncomfortable, sore	#NULL!	1	#NULL!	#NULL!	#NULL!	#NULL!	#NULL!	#NULL!	#NULL!		0	#NULL!	#NULL!	#NULL!	#NULL!	#NULL!	#NULL!	#NULL!	#NULL!	#NULL!	#NULL!	#NULL!	#NULL!	#NULL!	#NULL!	#NULL!	#NULL!	#NULL!	#NULL!	#NULL!	#NULL!	#NULL!	#NULL!	#NULL!	#NULL!	1	6	#NULL!	#NULL!	#NULL!	#NULL!		4	4	4	4
2019-11-20 13:38:19	379	2019-11-20	pretty good	#NULL!	1	#NULL!	#NULL!	#NULL!	#NULL!	#NULL!	#NULL!	#NULL!		0	#NULL!	#NULL!	#NULL!	#NULL!	#NULL!	#NULL!	#NULL!	#NULL!	#NULL!	#NULL!	#NULL!	#NULL!	#NULL!	#NULL!	#NULL!	#NULL!	#NULL!	#NULL!	#NULL!	#NULL!	#NULL!	#NULL!	#NULL!	#NULL!	1	0	#NULL!	#NULL!	#NULL!	#NULL!		#NULL!	#NULL!	#NULL!	#NULL!
2020-07-20 09:53:51	380	2020-07-20	Good	#NULL!	1	#NULL!	#NULL!	#NULL!	#NULL!	#NULL!	#NULL!	#NULL!		0	#NULL!	#NULL!	#NULL!	#NULL!	#NULL!	#NULL!	#NULL!	#NULL!	#NULL!	#NULL!	#NULL!	#NULL!	#NULL!	#NULL!	#NULL!	#NULL!	#NULL!	#NULL!	#NULL!	#NULL!	#NULL!	#NULL!	#NULL!	#NULL!	1	1	1	#NULL!	#NULL!	#NULL!		2	2	2	2
2020-07-27 20:18:08	380	2020-07-27	Good	#NULL!	1	#NULL!	#NULL!	#NULL!	#NULL!	#NULL!	#NULL!	#NULL!		0	#NULL!	#NULL!	#NULL!	#NULL!	#NULL!	#NULL!	#NULL!	#NULL!	#NULL!	#NULL!	#NULL!	#NULL!	#NULL!	#NULL!	#NULL!	#NULL!	#NULL!	#NULL!	#NULL!	#NULL!	#NULL!	#NULL!	#NULL!	#NULL!	1	2	1	#NULL!	#NULL!	#NULL!		2	2	2	2
2020-08-10 17:17:26	380	2020-08-10	good	#NULL!	1	#NULL!	#NULL!	#NULL!	#NULL!	#NULL!	#NULL!	#NULL!		0	#NULL!	#NULL!	#NULL!	#NULL!	#NULL!	#NULL!	#NULL!	#NULL!	#NULL!	#NULL!	#NULL!	#NULL!	#NULL!	#NULL!	#NULL!	#NULL!	#NULL!	#NULL!	#NULL!	#NULL!	#NULL!	#NULL!	#NULL!	#NULL!	1	1	1	#NULL!	#NULL!	#NULL!		2	2	2	2
2020-01-15 10:11:38	384	2020-01-15	not too bad	#NULL!	1	#NULL!	#NULL!	#NULL!	#NULL!	#NULL!	#NULL!	#NULL!		0	#NULL!	#NULL!	#NULL!	#NULL!	#NULL!	#NULL!	#NULL!	#NULL!	#NULL!	#NULL!	#NULL!	#NULL!	#NULL!	#NULL!	#NULL!	#NULL!	#NULL!	#NULL!	#NULL!	#NULL!	#NULL!	#NULL!	#NULL!	#NULL!	1	2	#NULL!	#NULL!	#NULL!	#NULL!		1	1	1	1
2020-01-24 11:03:11	384	2020-01-24	not great	#NULL!	1	#NULL!	#NULL!	#NULL!	#NULL!	#NULL!	#NULL!	#NULL!		0	#NULL!	#NULL!	#NULL!	#NULL!	#NULL!	#NULL!	#NULL!	#NULL!	#NULL!	#NULL!	#NULL!	#NULL!	#NULL!	#NULL!	#NULL!	#NULL!	#NULL!	#NULL!	#NULL!	#NULL!	#NULL!	#NULL!	#NULL!	#NULL!	1	2	#NULL!	#NULL!	#NULL!	#NULL!		3	3	3	3
2020-01-21 13:20:45	386	2020-01-21	good	#NULL!	1	#NULL!	#NULL!	#NULL!	#NULL!	#NULL!	#NULL!	#NULL!		0	#NULL!	#NULL!	#NULL!	#NULL!	#NULL!	#NULL!	#NULL!	#NULL!	#NULL!	#NULL!	#NULL!	#NULL!	#NULL!	#NULL!	#NULL!	#NULL!	#NULL!	#NULL!	#NULL!	#NULL!	#NULL!	#NULL!	#NULL!	#NULL!	1	0	#NULL!	#NULL!	#NULL!	#NULL!		#NULL!	#NULL!	#NULL!	#NULL!
2020-01-28 12:00:17	386	2020-01-28	good	#NULL!	1	#NULL!	#NULL!	#NULL!	#NULL!	#NULL!	#NULL!	#NULL!		0	#NULL!	#NULL!	#NULL!	#NULL!	#NULL!	#NULL!	#NULL!	#NULL!	#NULL!	#NULL!	#NULL!	#NULL!	#NULL!	#NULL!	#NULL!	#NULL!	#NULL!	#NULL!	#NULL!	#NULL!	#NULL!	#NULL!	#NULL!	#NULL!	1	0	#NULL!	#NULL!	#NULL!	#NULL!		#NULL!	#NULL!	#NULL!	#NULL!
2019-11-14 11:59:05	387	2019-11-14	Good	#NULL!	1	#NULL!	#NULL!	#NULL!	#NULL!	#NULL!	#NULL!	#NULL!		1	4	1	1	1	2	2	2	3	1	1	1	1	3	2	3	3	3	2	3	3	2	1	2	2	1	1	#NULL!	#NULL!	#NULL!	#NULL!		1	1	1	3
2020-01-24 16:36:47	390	2020-01-24	Very good	#NULL!	1	#NULL!	#NULL!	#NULL!	#NULL!	#NULL!	#NULL!	#NULL!		0	#NULL!	#NULL!	#NULL!	#NULL!	#NULL!	#NULL!	#NULL!	#NULL!	#NULL!	#NULL!	#NULL!	#NULL!	#NULL!	#NULL!	#NULL!	#NULL!	#NULL!	#NULL!	#NULL!	#NULL!	#NULL!	#NULL!	#NULL!	#NULL!	1	0	#NULL!	#NULL!	#NULL!	#NULL!		#NULL!	#NULL!	#NULL!	#NULL!
2020-01-28 17:20:58	390	2020-01-28	Very good	#NULL!	1	#NULL!	#NULL!	#NULL!	#NULL!	#NULL!	#NULL!	#NULL!		0	#NULL!	#NULL!	#NULL!	#NULL!	#NULL!	#NULL!	#NULL!	#NULL!	#NULL!	#NULL!	#NULL!	#NULL!	#NULL!	#NULL!	#NULL!	#NULL!	#NULL!	#NULL!	#NULL!	#NULL!	#NULL!	#NULL!	#NULL!	#NULL!	1	1	#NULL!	#NULL!	#NULL!	#NULL!		2	2	1	2
2020-01-21 18:53:57	391	2020-01-21	Ok	#NULL!	1	#NULL!	1	#NULL!	#NULL!	#NULL!	#NULL!	#NULL!		1	2	3	2	2	2	1	1	2	1	1	1	1	2	2	1	1	3	2	2	2	1	1	2	2	1	1	#NULL!	#NULL!	#NULL!	#NULL!		1	2	1	2
2020-01-30 12:49:01	391	2020-01-30	Good, adjusting to Arimidex and mid way through radiation	#NULL!	1	#NULL!	1	#NULL!	#NULL!	#NULL!	#NULL!	#NULL!		0	#NULL!	#NULL!	#NULL!	#NULL!	#NULL!	#NULL!	#NULL!	#NULL!	#NULL!	#NULL!	#NULL!	#NULL!	#NULL!	#NULL!	#NULL!	#NULL!	#NULL!	#NULL!	#NULL!	#NULL!	#NULL!	#NULL!	#NULL!	#NULL!	1	1	#NULL!	#NULL!	#NULL!	#NULL!		2	2	2	2
2020-01-24 11:27:34	393	2020-01-24	great--I started radiation and am tolerating it well	#NULL!	1	#NULL!	#NULL!	#NULL!	#NULL!	#NULL!	#NULL!	#NULL!		0	#NULL!	#NULL!	#NULL!	#NULL!	#NULL!	#NULL!	#NULL!	#NULL!	#NULL!	#NULL!	#NULL!	#NULL!	#NULL!	#NULL!	#NULL!	#NULL!	#NULL!	#NULL!	#NULL!	#NULL!	#NULL!	#NULL!	#NULL!	#NULL!	1	0	#NULL!	#NULL!	#NULL!	#NULL!		#NULL!	#NULL!	#NULL!	#NULL!
2020-01-31 10:12:34	393	2020-01-31	good	#NULL!	1	#NULL!	#NULL!	#NULL!	#NULL!	#NULL!	#NULL!	#NULL!		0	#NULL!	#NULL!	#NULL!	#NULL!	#NULL!	#NULL!	#NULL!	#NULL!	#NULL!	#NULL!	#NULL!	#NULL!	#NULL!	#NULL!	#NULL!	#NULL!	#NULL!	#NULL!	#NULL!	#NULL!	#NULL!	#NULL!	#NULL!	#NULL!	1	0	#NULL!	#NULL!	#NULL!	#NULL!		#NULL!	#NULL!	#NULL!	#NULL!
2020-02-06 10:01:18	393	2020-02-06	Cold and sinus infection	#NULL!	1	#NULL!	#NULL!	#NULL!	#NULL!	#NULL!	#NULL!	#NULL!		0	#NULL!	#NULL!	#NULL!	#NULL!	#NULL!	#NULL!	#NULL!	#NULL!	#NULL!	#NULL!	#NULL!	#NULL!	#NULL!	#NULL!	#NULL!	#NULL!	#NULL!	#NULL!	#NULL!	#NULL!	#NULL!	#NULL!	#NULL!	#NULL!	1	0	#NULL!	#NULL!	#NULL!	#NULL!		#NULL!	#NULL!	#NULL!	#NULL!
2020-05-11 12:01:39	395	2020-05-11	Fair	#NULL!	1	#NULL!	#NULL!	#NULL!	#NULL!	1	#NULL!	#NULL!		0	#NULL!	#NULL!	#NULL!	#NULL!	#NULL!	#NULL!	#NULL!	#NULL!	#NULL!	#NULL!	#NULL!	#NULL!	#NULL!	#NULL!	#NULL!	#NULL!	#NULL!	#NULL!	#NULL!	#NULL!	#NULL!	#NULL!	#NULL!	#NULL!	1	4	#NULL!	#NULL!	#NULL!	#NULL!		1	1	2	1
2020-05-19 13:32:21	395	2020-05-19	Ok	#NULL!	1	#NULL!	1	#NULL!	#NULL!	1	#NULL!	#NULL!		0	#NULL!	#NULL!	#NULL!	#NULL!	#NULL!	#NULL!	#NULL!	#NULL!	#NULL!	#NULL!	#NULL!	#NULL!	#NULL!	#NULL!	#NULL!	#NULL!	#NULL!	#NULL!	#NULL!	#NULL!	#NULL!	#NULL!	#NULL!	#NULL!	1	3	#NULL!	#NULL!	#NULL!	#NULL!		2	3	4	2
2020-06-08 18:44:58	395	2020-06-08	Ok	#NULL!	1	#NULL!	1	#NULL!	#NULL!	1	#NULL!	#NULL!		0	#NULL!	#NULL!	#NULL!	#NULL!	#NULL!	#NULL!	#NULL!	#NULL!	#NULL!	#NULL!	#NULL!	#NULL!	#NULL!	#NULL!	#NULL!	#NULL!	#NULL!	#NULL!	#NULL!	#NULL!	#NULL!	#NULL!	#NULL!	#NULL!	1	3	#NULL!	#NULL!	#NULL!	#NULL!		2	3	2	4
2020-01-21 13:06:23	396	2020-01-21	pretty much the same	#NULL!	1	#NULL!	#NULL!	#NULL!	#NULL!	#NULL!	#NULL!	#NULL!		0	#NULL!	#NULL!	#NULL!	#NULL!	#NULL!	#NULL!	#NULL!	#NULL!	#NULL!	#NULL!	#NULL!	#NULL!	#NULL!	#NULL!	#NULL!	#NULL!	#NULL!	#NULL!	#NULL!	#NULL!	#NULL!	#NULL!	#NULL!	#NULL!	1	2	#NULL!	#NULL!	#NULL!	#NULL!		1	1	1	1
2020-01-15 10:25:23	397	2020-01-15	very good	#NULL!	1	#NULL!	#NULL!	#NULL!	#NULL!	#NULL!	#NULL!	#NULL!		0	#NULL!	#NULL!	#NULL!	#NULL!	#NULL!	#NULL!	#NULL!	#NULL!	#NULL!	#NULL!	#NULL!	#NULL!	#NULL!	#NULL!	#NULL!	#NULL!	#NULL!	#NULL!	#NULL!	#NULL!	#NULL!	#NULL!	#NULL!	#NULL!	1	0	#NULL!	#NULL!	#NULL!	#NULL!		#NULL!	#NULL!	#NULL!	#NULL!
2020-01-21 14:33:21	397	2020-01-21	Feel great, skins not red.	#NULL!	1	#NULL!	#NULL!	#NULL!	#NULL!	#NULL!	#NULL!	#NULL!		0	#NULL!	#NULL!	#NULL!	#NULL!	#NULL!	#NULL!	#NULL!	#NULL!	#NULL!	#NULL!	#NULL!	#NULL!	#NULL!	#NULL!	#NULL!	#NULL!	#NULL!	#NULL!	#NULL!	#NULL!	#NULL!	#NULL!	#NULL!	#NULL!	1	0	#NULL!	#NULL!	#NULL!	#NULL!		#NULL!	#NULL!	#NULL!	#NULL!
2020-01-29 14:09:38	397	2020-01-29	"Real good--no fatigue, no nausea, no pain, nothing"	#NULL!	1	#NULL!	#NULL!	#NULL!	#NULL!	#NULL!	#NULL!	#NULL!		0	#NULL!	#NULL!	#NULL!	#NULL!	#NULL!	#NULL!	#NULL!	#NULL!	#NULL!	#NULL!	#NULL!	#NULL!	#NULL!	#NULL!	#NULL!	#NULL!	#NULL!	#NULL!	#NULL!	#NULL!	#NULL!	#NULL!	#NULL!	#NULL!	1	0	#NULL!	#NULL!	#NULL!	#NULL!		#NULL!	#NULL!	#NULL!	#NULL!
2020-02-17 09:18:57	397	2020-02-17	I'm doing okay, but I'm really burned from the radiation	#NULL!	1	#NULL!	#NULL!	#NULL!	#NULL!	#NULL!	#NULL!	#NULL!		0	#NULL!	#NULL!	#NULL!	#NULL!	#NULL!	#NULL!	#NULL!	#NULL!	#NULL!	#NULL!	#NULL!	#NULL!	#NULL!	#NULL!	#NULL!	#NULL!	#NULL!	#NULL!	#NULL!	#NULL!	#NULL!	#NULL!	#NULL!	#NULL!	1	0	#NULL!	#NULL!	#NULL!	#NULL!		#NULL!	#NULL!	#NULL!	#NULL!
2020-02-24 23:03:48	398	2020-02-24	Tired	#NULL!	1	#NULL!	#NULL!	#NULL!	#NULL!	#NULL!	#NULL!	1		0	#NULL!	#NULL!	#NULL!	#NULL!	#NULL!	#NULL!	#NULL!	#NULL!	#NULL!	#NULL!	#NULL!	#NULL!	#NULL!	#NULL!	#NULL!	#NULL!	#NULL!	#NULL!	#NULL!	#NULL!	#NULL!	#NULL!	#NULL!	#NULL!	1	1	#NULL!	#NULL!	#NULL!	#NULL!		1	1	1	1
2020-02-13 16:16:45	399	2020-02-13	good	#NULL!	1	1	#NULL!	#NULL!	#NULL!	1	#NULL!	1	kadcyla	0	#NULL!	#NULL!	#NULL!	#NULL!	#NULL!	#NULL!	#NULL!	#NULL!	#NULL!	#NULL!	#NULL!	#NULL!	#NULL!	#NULL!	#NULL!	#NULL!	#NULL!	#NULL!	#NULL!	#NULL!	#NULL!	#NULL!	#NULL!	#NULL!	1	0	#NULL!	#NULL!	#NULL!	#NULL!		#NULL!	#NULL!	#NULL!	#NULL!
2020-02-21 17:05:13	399	2020-02-21	good	#NULL!	1	1	#NULL!	#NULL!	#NULL!	#NULL!	#NULL!	1		0	#NULL!	#NULL!	#NULL!	#NULL!	#NULL!	#NULL!	#NULL!	#NULL!	#NULL!	#NULL!	#NULL!	#NULL!	#NULL!	#NULL!	#NULL!	#NULL!	#NULL!	#NULL!	#NULL!	#NULL!	#NULL!	#NULL!	#NULL!	#NULL!	1	0	#NULL!	#NULL!	#NULL!	#NULL!		#NULL!	#NULL!	#NULL!	#NULL!
2020-02-10 15:55:07	401	2020-02-10	Fine	#NULL!	1	#NULL!	#NULL!	#NULL!	#NULL!	#NULL!	#NULL!	#NULL!		0	#NULL!	#NULL!	#NULL!	#NULL!	#NULL!	#NULL!	#NULL!	#NULL!	#NULL!	#NULL!	#NULL!	#NULL!	#NULL!	#NULL!	#NULL!	#NULL!	#NULL!	#NULL!	#NULL!	#NULL!	#NULL!	#NULL!	#NULL!	#NULL!	1	1	#NULL!	#NULL!	#NULL!	#NULL!		1	1	1	1
2020-02-18 12:37:18	401	2020-02-18	GOOD	#NULL!	1	#NULL!	#NULL!	#NULL!	#NULL!	#NULL!	#NULL!	#NULL!		0	#NULL!	#NULL!	#NULL!	#NULL!	#NULL!	#NULL!	#NULL!	#NULL!	#NULL!	#NULL!	#NULL!	#NULL!	#NULL!	#NULL!	#NULL!	#NULL!	#NULL!	#NULL!	#NULL!	#NULL!	#NULL!	#NULL!	#NULL!	#NULL!	1	1	#NULL!	#NULL!	#NULL!	#NULL!		1	1	1	1
2020-01-17 12:19:52	402	2020-01-17	Good	#NULL!	1	#NULL!	#NULL!	#NULL!	#NULL!	#NULL!	#NULL!	#NULL!		0	#NULL!	#NULL!	#NULL!	#NULL!	#NULL!	#NULL!	#NULL!	#NULL!	#NULL!	#NULL!	#NULL!	#NULL!	#NULL!	#NULL!	#NULL!	#NULL!	#NULL!	#NULL!	#NULL!	#NULL!	#NULL!	#NULL!	#NULL!	#NULL!	1	3	#NULL!	#NULL!	#NULL!	#NULL!		2	2	5	2
2020-01-24 11:42:44	402	2020-01-24	going well--some radiation dermatitis over breast	#NULL!	1	#NULL!	#NULL!	#NULL!	#NULL!	#NULL!	#NULL!	#NULL!		0	#NULL!	#NULL!	#NULL!	#NULL!	#NULL!	#NULL!	#NULL!	#NULL!	#NULL!	#NULL!	#NULL!	#NULL!	#NULL!	#NULL!	#NULL!	#NULL!	#NULL!	#NULL!	#NULL!	#NULL!	#NULL!	#NULL!	#NULL!	#NULL!	1	0	#NULL!	#NULL!	#NULL!	#NULL!		#NULL!	#NULL!	#NULL!	#NULL!
2020-01-21 16:03:51	403	2020-01-21	Overall I feel well, started radiation on the 15th.	#NULL!	1	#NULL!	#NULL!	#NULL!	#NULL!	#NULL!	#NULL!	#NULL!		0	#NULL!	#NULL!	#NULL!	#NULL!	#NULL!	#NULL!	#NULL!	#NULL!	#NULL!	#NULL!	#NULL!	#NULL!	#NULL!	#NULL!	#NULL!	#NULL!	#NULL!	#NULL!	#NULL!	#NULL!	#NULL!	#NULL!	#NULL!	#NULL!	1	0	#NULL!	#NULL!	#NULL!	#NULL!		#NULL!	#NULL!	#NULL!	#NULL!
2020-01-28 12:10:18	403	2020-01-28	fine	#NULL!	1	#NULL!	#NULL!	#NULL!	#NULL!	#NULL!	#NULL!	#NULL!		0	#NULL!	#NULL!	#NULL!	#NULL!	#NULL!	#NULL!	#NULL!	#NULL!	#NULL!	#NULL!	#NULL!	#NULL!	#NULL!	#NULL!	#NULL!	#NULL!	#NULL!	#NULL!	#NULL!	#NULL!	#NULL!	#NULL!	#NULL!	#NULL!	1	0	#NULL!	#NULL!	#NULL!	#NULL!		#NULL!	#NULL!	#NULL!	#NULL!
2020-01-30 18:09:35	404	2020-01-30	Good	#NULL!	1	#NULL!	#NULL!	#NULL!	#NULL!	#NULL!	#NULL!	#NULL!		0	#NULL!	#NULL!	#NULL!	#NULL!	#NULL!	#NULL!	#NULL!	#NULL!	#NULL!	#NULL!	#NULL!	#NULL!	#NULL!	#NULL!	#NULL!	#NULL!	#NULL!	#NULL!	#NULL!	#NULL!	#NULL!	#NULL!	#NULL!	#NULL!	1	2	#NULL!	#NULL!	#NULL!	#NULL!		1	1	1	1
2020-02-25 12:41:13	405	2020-02-25	good, but tired	#NULL!	1	#NULL!	#NULL!	#NULL!	#NULL!	#NULL!	#NULL!	#NULL!		1	2	2	3	2	1	2	2	1	1	1	1	1	4	4	3	4	1	1	1	1	3	3	3	3	3	10	#NULL!	#NULL!	#NULL!	#NULL!		5	5	5	5
2020-02-07 15:11:39	406	2020-02-07	good	#NULL!	1	#NULL!	#NULL!	#NULL!	#NULL!	#NULL!	#NULL!	#NULL!		0	#NULL!	#NULL!	#NULL!	#NULL!	#NULL!	#NULL!	#NULL!	#NULL!	#NULL!	#NULL!	#NULL!	#NULL!	#NULL!	#NULL!	#NULL!	#NULL!	#NULL!	#NULL!	#NULL!	#NULL!	#NULL!	#NULL!	#NULL!	#NULL!	1	0	#NULL!	#NULL!	#NULL!	#NULL!		#NULL!	#NULL!	#NULL!	#NULL!
2020-02-13 09:50:38	406	2020-02-13	feeling exactly the same	#NULL!	1	#NULL!	#NULL!	#NULL!	#NULL!	#NULL!	#NULL!	#NULL!		0	#NULL!	#NULL!	#NULL!	#NULL!	#NULL!	#NULL!	#NULL!	#NULL!	#NULL!	#NULL!	#NULL!	#NULL!	#NULL!	#NULL!	#NULL!	#NULL!	#NULL!	#NULL!	#NULL!	#NULL!	#NULL!	#NULL!	#NULL!	#NULL!	1	0	#NULL!	#NULL!	#NULL!	#NULL!		#NULL!	#NULL!	#NULL!	#NULL!
2020-02-20 10:13:39	406	2020-02-20	Great	#NULL!	1	#NULL!	#NULL!	#NULL!	#NULL!	#NULL!	#NULL!	#NULL!		0	#NULL!	#NULL!	#NULL!	#NULL!	#NULL!	#NULL!	#NULL!	#NULL!	#NULL!	#NULL!	#NULL!	#NULL!	#NULL!	#NULL!	#NULL!	#NULL!	#NULL!	#NULL!	#NULL!	#NULL!	#NULL!	#NULL!	#NULL!	#NULL!	1	0	#NULL!	#NULL!	#NULL!	#NULL!		#NULL!	#NULL!	#NULL!	#NULL!
2020-02-20 12:25:21	406	2020-02-20	fine. normal	#NULL!	1	#NULL!	#NULL!	#NULL!	#NULL!	#NULL!	#NULL!	#NULL!		0	#NULL!	#NULL!	#NULL!	#NULL!	#NULL!	#NULL!	#NULL!	#NULL!	#NULL!	#NULL!	#NULL!	#NULL!	#NULL!	#NULL!	#NULL!	#NULL!	#NULL!	#NULL!	#NULL!	#NULL!	#NULL!	#NULL!	#NULL!	#NULL!	1	0	#NULL!	#NULL!	#NULL!	#NULL!		#NULL!	#NULL!	#NULL!	#NULL!
2020-03-02 15:44:18	406	2020-03-02	good	#NULL!	1	#NULL!	#NULL!	#NULL!	#NULL!	#NULL!	#NULL!	#NULL!		0	#NULL!	#NULL!	#NULL!	#NULL!	#NULL!	#NULL!	#NULL!	#NULL!	#NULL!	#NULL!	#NULL!	#NULL!	#NULL!	#NULL!	#NULL!	#NULL!	#NULL!	#NULL!	#NULL!	#NULL!	#NULL!	#NULL!	#NULL!	#NULL!	1	0	#NULL!	#NULL!	#NULL!	#NULL!		#NULL!	#NULL!	#NULL!	#NULL!
2020-03-30 16:44:31	409	2020-03-30	feeling fantastic	#NULL!	1	#NULL!	#NULL!	#NULL!	#NULL!	#NULL!	#NULL!	#NULL!		0	#NULL!	#NULL!	#NULL!	#NULL!	#NULL!	#NULL!	#NULL!	#NULL!	#NULL!	#NULL!	#NULL!	#NULL!	#NULL!	#NULL!	#NULL!	#NULL!	#NULL!	#NULL!	#NULL!	#NULL!	#NULL!	#NULL!	#NULL!	#NULL!	1	0	#NULL!	#NULL!	#NULL!	#NULL!		#NULL!	#NULL!	#NULL!	#NULL!
2020-03-10 19:30:22	410	2020-03-10	fine	#NULL!	1	#NULL!	#NULL!	#NULL!	#NULL!	#NULL!	#NULL!	#NULL!		0	#NULL!	#NULL!	#NULL!	#NULL!	#NULL!	#NULL!	#NULL!	#NULL!	#NULL!	#NULL!	#NULL!	#NULL!	#NULL!	#NULL!	#NULL!	#NULL!	#NULL!	#NULL!	#NULL!	#NULL!	#NULL!	#NULL!	#NULL!	#NULL!	1	0	#NULL!	#NULL!	#NULL!	#NULL!		#NULL!	#NULL!	#NULL!	#NULL!
2020-03-16 16:22:51	410	2020-03-16	fine	#NULL!	1	#NULL!	#NULL!	#NULL!	#NULL!	#NULL!	#NULL!	#NULL!		0	#NULL!	#NULL!	#NULL!	#NULL!	#NULL!	#NULL!	#NULL!	#NULL!	#NULL!	#NULL!	#NULL!	#NULL!	#NULL!	#NULL!	#NULL!	#NULL!	#NULL!	#NULL!	#NULL!	#NULL!	#NULL!	#NULL!	#NULL!	#NULL!	1	0	#NULL!	#NULL!	#NULL!	#NULL!		#NULL!	#NULL!	#NULL!	#NULL!
2020-03-23 17:05:44	410	2020-03-23	fine	#NULL!	1	#NULL!	#NULL!	#NULL!	#NULL!	#NULL!	#NULL!	#NULL!		0	#NULL!	#NULL!	#NULL!	#NULL!	#NULL!	#NULL!	#NULL!	#NULL!	#NULL!	#NULL!	#NULL!	#NULL!	#NULL!	#NULL!	#NULL!	#NULL!	#NULL!	#NULL!	#NULL!	#NULL!	#NULL!	#NULL!	#NULL!	#NULL!	1	0	#NULL!	#NULL!	#NULL!	#NULL!		#NULL!	#NULL!	#NULL!	#NULL!
2020-04-07 19:32:56	410	2020-04-07	ok	#NULL!	1	#NULL!	#NULL!	#NULL!	#NULL!	#NULL!	#NULL!	1	Zolodex	0	#NULL!	#NULL!	#NULL!	#NULL!	#NULL!	#NULL!	#NULL!	#NULL!	#NULL!	#NULL!	#NULL!	#NULL!	#NULL!	#NULL!	#NULL!	#NULL!	#NULL!	#NULL!	#NULL!	#NULL!	#NULL!	#NULL!	#NULL!	#NULL!	1	2	#NULL!	#NULL!	#NULL!	#NULL!		1	1	1	1
2020-04-13 22:18:26	410	2020-04-13	OK	#NULL!	1	#NULL!	#NULL!	#NULL!	#NULL!	#NULL!	#NULL!	1	Zolodex	0	#NULL!	#NULL!	#NULL!	#NULL!	#NULL!	#NULL!	#NULL!	#NULL!	#NULL!	#NULL!	#NULL!	#NULL!	#NULL!	#NULL!	#NULL!	#NULL!	#NULL!	#NULL!	#NULL!	#NULL!	#NULL!	#NULL!	#NULL!	#NULL!	1	0	#NULL!	#NULL!	#NULL!	#NULL!		#NULL!	#NULL!	#NULL!	#NULL!
2020-02-10 15:41:34	411	2020-02-10	Good	#NULL!	1	#NULL!	#NULL!	#NULL!	#NULL!	#NULL!	#NULL!	#NULL!		0	#NULL!	#NULL!	#NULL!	#NULL!	#NULL!	#NULL!	#NULL!	#NULL!	#NULL!	#NULL!	#NULL!	#NULL!	#NULL!	#NULL!	#NULL!	#NULL!	#NULL!	#NULL!	#NULL!	#NULL!	#NULL!	#NULL!	#NULL!	#NULL!	1	0	#NULL!	#NULL!	#NULL!	#NULL!		#NULL!	#NULL!	#NULL!	#NULL!
2020-02-17 15:43:45	411	2020-02-17	Just FIne	#NULL!	1	#NULL!	#NULL!	#NULL!	#NULL!	#NULL!	#NULL!	#NULL!		0	#NULL!	#NULL!	#NULL!	#NULL!	#NULL!	#NULL!	#NULL!	#NULL!	#NULL!	#NULL!	#NULL!	#NULL!	#NULL!	#NULL!	#NULL!	#NULL!	#NULL!	#NULL!	#NULL!	#NULL!	#NULL!	#NULL!	#NULL!	#NULL!	1	0	#NULL!	#NULL!	#NULL!	#NULL!		#NULL!	#NULL!	#NULL!	#NULL!
2020-02-26 15:48:55	411	2020-02-26	good	#NULL!	1	#NULL!	#NULL!	#NULL!	#NULL!	#NULL!	#NULL!	#NULL!		0	#NULL!	#NULL!	#NULL!	#NULL!	#NULL!	#NULL!	#NULL!	#NULL!	#NULL!	#NULL!	#NULL!	#NULL!	#NULL!	#NULL!	#NULL!	#NULL!	#NULL!	#NULL!	#NULL!	#NULL!	#NULL!	#NULL!	#NULL!	#NULL!	1	0	#NULL!	#NULL!	#NULL!	#NULL!		#NULL!	#NULL!	#NULL!	#NULL!
2020-03-19 09:43:13	411	2020-03-18	Frustrated due to radiation burns	#NULL!	1	#NULL!	#NULL!	#NULL!	#NULL!	#NULL!	#NULL!	#NULL!		1	3	3	3	3	1	1	2	1	1	1	1	1	5	5	5	5	3	3	3	3	3	3	3	3	2	8	#NULL!	#NULL!	#NULL!	#NULL!		4	4	4	4
2020-03-26 16:28:27	411	2020-03-26	Fine	#NULL!	1	#NULL!	#NULL!	#NULL!	#NULL!	#NULL!	#NULL!	#NULL!		0	#NULL!	#NULL!	#NULL!	#NULL!	#NULL!	#NULL!	#NULL!	#NULL!	#NULL!	#NULL!	#NULL!	#NULL!	#NULL!	#NULL!	#NULL!	#NULL!	#NULL!	#NULL!	#NULL!	#NULL!	#NULL!	#NULL!	#NULL!	#NULL!	1	3	#NULL!	#NULL!	#NULL!	#NULL!		2	1	1	1
2020-06-16 11:42:50	412	2020-06-16	Good	#NULL!	1	#NULL!	#NULL!	#NULL!	#NULL!	#NULL!	#NULL!	#NULL!		0	#NULL!	#NULL!	#NULL!	#NULL!	#NULL!	#NULL!	#NULL!	#NULL!	#NULL!	#NULL!	#NULL!	#NULL!	#NULL!	#NULL!	#NULL!	#NULL!	#NULL!	#NULL!	#NULL!	#NULL!	#NULL!	#NULL!	#NULL!	#NULL!	1	0	#NULL!	#NULL!	#NULL!	#NULL!		#NULL!	#NULL!	#NULL!	#NULL!
2020-06-22 11:53:54	412	2020-06-22	Good	#NULL!	1	#NULL!	#NULL!	#NULL!	#NULL!	#NULL!	#NULL!	#NULL!		0	#NULL!	#NULL!	#NULL!	#NULL!	#NULL!	#NULL!	#NULL!	#NULL!	#NULL!	#NULL!	#NULL!	#NULL!	#NULL!	#NULL!	#NULL!	#NULL!	#NULL!	#NULL!	#NULL!	#NULL!	#NULL!	#NULL!	#NULL!	#NULL!	1	0	#NULL!	#NULL!	#NULL!	#NULL!		#NULL!	#NULL!	#NULL!	#NULL!
2020-06-29 13:10:40	412	2020-06-29	Good	#NULL!	1	#NULL!	#NULL!	#NULL!	#NULL!	#NULL!	#NULL!	#NULL!		0	#NULL!	#NULL!	#NULL!	#NULL!	#NULL!	#NULL!	#NULL!	#NULL!	#NULL!	#NULL!	#NULL!	#NULL!	#NULL!	#NULL!	#NULL!	#NULL!	#NULL!	#NULL!	#NULL!	#NULL!	#NULL!	#NULL!	#NULL!	#NULL!	1	0	#NULL!	#NULL!	#NULL!	#NULL!		#NULL!	#NULL!	#NULL!	#NULL!
2020-07-13 15:02:11	412	2020-07-13	Good	#NULL!	1	#NULL!	#NULL!	#NULL!	#NULL!	#NULL!	#NULL!	#NULL!		0	#NULL!	#NULL!	#NULL!	#NULL!	#NULL!	#NULL!	#NULL!	#NULL!	#NULL!	#NULL!	#NULL!	#NULL!	#NULL!	#NULL!	#NULL!	#NULL!	#NULL!	#NULL!	#NULL!	#NULL!	#NULL!	#NULL!	#NULL!	#NULL!	1	0	#NULL!	#NULL!	#NULL!	#NULL!		#NULL!	#NULL!	#NULL!	#NULL!
2020-03-19 09:32:39	413	2020-03-18	good tired	#NULL!	1	#NULL!	#NULL!	#NULL!	#NULL!	#NULL!	#NULL!	#NULL!		0	#NULL!	#NULL!	#NULL!	#NULL!	#NULL!	#NULL!	#NULL!	#NULL!	#NULL!	#NULL!	#NULL!	#NULL!	#NULL!	#NULL!	#NULL!	#NULL!	#NULL!	#NULL!	#NULL!	#NULL!	#NULL!	#NULL!	#NULL!	#NULL!	1	5	#NULL!	#NULL!	#NULL!	#NULL!		1	2	1	1
2020-03-27 12:30:19	413	2020-03-27	Okay	#NULL!	1	#NULL!	#NULL!	#NULL!	#NULL!	#NULL!	#NULL!	#NULL!		0	#NULL!	#NULL!	#NULL!	#NULL!	#NULL!	#NULL!	#NULL!	#NULL!	#NULL!	#NULL!	#NULL!	#NULL!	#NULL!	#NULL!	#NULL!	#NULL!	#NULL!	#NULL!	#NULL!	#NULL!	#NULL!	#NULL!	#NULL!	#NULL!	1	4	#NULL!	#NULL!	#NULL!	#NULL!		3	2	3	3
2020-04-09 12:15:57	413	2020-04-09	Pretty Good	#NULL!	1	#NULL!	#NULL!	#NULL!	#NULL!	#NULL!	#NULL!	#NULL!		0	#NULL!	#NULL!	#NULL!	#NULL!	#NULL!	#NULL!	#NULL!	#NULL!	#NULL!	#NULL!	#NULL!	#NULL!	#NULL!	#NULL!	#NULL!	#NULL!	#NULL!	#NULL!	#NULL!	#NULL!	#NULL!	#NULL!	#NULL!	#NULL!	1	5	#NULL!	#NULL!	#NULL!	#NULL!		2	2	3	2
2020-04-15 11:38:27	414	2020-04-15	fine	#NULL!	1	#NULL!	1	#NULL!	#NULL!	#NULL!	#NULL!	#NULL!		0	#NULL!	#NULL!	#NULL!	#NULL!	#NULL!	#NULL!	#NULL!	#NULL!	#NULL!	#NULL!	#NULL!	#NULL!	#NULL!	#NULL!	#NULL!	#NULL!	#NULL!	#NULL!	#NULL!	#NULL!	#NULL!	#NULL!	#NULL!	#NULL!	1	0	#NULL!	#NULL!	#NULL!	#NULL!		#NULL!	#NULL!	#NULL!	#NULL!
2020-04-22 13:16:55	414	2020-04-22	fine	#NULL!	1	#NULL!	#NULL!	#NULL!	#NULL!	#NULL!	#NULL!	#NULL!		0	#NULL!	#NULL!	#NULL!	#NULL!	#NULL!	#NULL!	#NULL!	#NULL!	#NULL!	#NULL!	#NULL!	#NULL!	#NULL!	#NULL!	#NULL!	#NULL!	#NULL!	#NULL!	#NULL!	#NULL!	#NULL!	#NULL!	#NULL!	#NULL!	1	0	#NULL!	#NULL!	#NULL!	#NULL!		#NULL!	#NULL!	#NULL!	#NULL!
2020-04-29 10:55:59	414	2020-04-29	Irritating throat but otherwise fine	#NULL!	1	#NULL!	#NULL!	#NULL!	#NULL!	#NULL!	#NULL!	#NULL!		0	#NULL!	#NULL!	#NULL!	#NULL!	#NULL!	#NULL!	#NULL!	#NULL!	#NULL!	#NULL!	#NULL!	#NULL!	#NULL!	#NULL!	#NULL!	#NULL!	#NULL!	#NULL!	#NULL!	#NULL!	#NULL!	#NULL!	#NULL!	#NULL!	1	0	#NULL!	#NULL!	#NULL!	#NULL!		#NULL!	#NULL!	#NULL!	#NULL!
2020-04-17 11:14:18	415	2020-04-17	Fine	#NULL!	1	#NULL!	#NULL!	#NULL!	#NULL!	#NULL!	#NULL!	#NULL!		0	#NULL!	#NULL!	#NULL!	#NULL!	#NULL!	#NULL!	#NULL!	#NULL!	#NULL!	#NULL!	#NULL!	#NULL!	#NULL!	#NULL!	#NULL!	#NULL!	#NULL!	#NULL!	#NULL!	#NULL!	#NULL!	#NULL!	#NULL!	#NULL!	1	0	#NULL!	#NULL!	#NULL!	#NULL!		#NULL!	#NULL!	#NULL!	#NULL!
2020-04-22 13:23:27	415	2020-04-22	fine	#NULL!	1	#NULL!	#NULL!	#NULL!	#NULL!	#NULL!	#NULL!	#NULL!		0	#NULL!	#NULL!	#NULL!	#NULL!	#NULL!	#NULL!	#NULL!	#NULL!	#NULL!	#NULL!	#NULL!	#NULL!	#NULL!	#NULL!	#NULL!	#NULL!	#NULL!	#NULL!	#NULL!	#NULL!	#NULL!	#NULL!	#NULL!	#NULL!	1	0	#NULL!	#NULL!	#NULL!	#NULL!		#NULL!	#NULL!	#NULL!	#NULL!
2020-04-29 11:10:15	415	2020-04-29	A little sore, otherwise OK.	#NULL!	1	#NULL!	#NULL!	#NULL!	#NULL!	#NULL!	#NULL!	#NULL!		0	#NULL!	#NULL!	#NULL!	#NULL!	#NULL!	#NULL!	#NULL!	#NULL!	#NULL!	#NULL!	#NULL!	#NULL!	#NULL!	#NULL!	#NULL!	#NULL!	#NULL!	#NULL!	#NULL!	#NULL!	#NULL!	#NULL!	#NULL!	#NULL!	1	2	#NULL!	#NULL!	#NULL!	#NULL!		1	1	1	1
2020-05-14 11:23:24	415	2020-05-14	good	#NULL!	1	#NULL!	#NULL!	#NULL!	#NULL!	#NULL!	#NULL!	#NULL!		0	#NULL!	#NULL!	#NULL!	#NULL!	#NULL!	#NULL!	#NULL!	#NULL!	#NULL!	#NULL!	#NULL!	#NULL!	#NULL!	#NULL!	#NULL!	#NULL!	#NULL!	#NULL!	#NULL!	#NULL!	#NULL!	#NULL!	#NULL!	#NULL!	1	3	#NULL!	#NULL!	#NULL!	#NULL!		1	1	1	1
2020-04-09 10:33:22	416	2020-04-09	Good	#NULL!	1	#NULL!	#NULL!	#NULL!	#NULL!	#NULL!	#NULL!	#NULL!		0	#NULL!	#NULL!	#NULL!	#NULL!	#NULL!	#NULL!	#NULL!	#NULL!	#NULL!	#NULL!	#NULL!	#NULL!	#NULL!	#NULL!	#NULL!	#NULL!	#NULL!	#NULL!	#NULL!	#NULL!	#NULL!	#NULL!	#NULL!	#NULL!	1	0	#NULL!	#NULL!	#NULL!	#NULL!		#NULL!	#NULL!	#NULL!	#NULL!
2020-04-22 09:31:03	416	2020-04-22	doing great	#NULL!	1	#NULL!	#NULL!	#NULL!	#NULL!	#NULL!	#NULL!	#NULL!		0	#NULL!	#NULL!	#NULL!	#NULL!	#NULL!	#NULL!	#NULL!	#NULL!	#NULL!	#NULL!	#NULL!	#NULL!	#NULL!	#NULL!	#NULL!	#NULL!	#NULL!	#NULL!	#NULL!	#NULL!	#NULL!	#NULL!	#NULL!	#NULL!	1	0	#NULL!	#NULL!	#NULL!	#NULL!		#NULL!	#NULL!	#NULL!	#NULL!
2020-10-07 14:18:49	416	2020-02-24	Getting mold for radiation on Thursday	#NULL!	1	#NULL!	#NULL!	#NULL!	#NULL!	#NULL!	#NULL!	#NULL!		1	2	1	1	2	1	1	1	1	1	#NULL!	#NULL!	#NULL!	1	1	1	1	1	1	2	1	1	1	1	1	1	0	#NULL!	#NULL!	#NULL!	#NULL!		#NULL!	#NULL!	#NULL!	#NULL!
2020-04-16 17:18:07	417	2020-04-16	OK--started radiation Monday (4/13)	#NULL!	1	#NULL!	#NULL!	#NULL!	#NULL!	#NULL!	#NULL!	#NULL!		0	#NULL!	#NULL!	#NULL!	#NULL!	#NULL!	#NULL!	#NULL!	#NULL!	#NULL!	#NULL!	#NULL!	#NULL!	#NULL!	#NULL!	#NULL!	#NULL!	#NULL!	#NULL!	#NULL!	#NULL!	#NULL!	#NULL!	#NULL!	#NULL!	2	7	#NULL!	#NULL!	#NULL!	#NULL!		1	1	1	1
2020-04-17 14:26:51	418	2020-04-17	OK, hurting today	#NULL!	1	#NULL!	#NULL!	#NULL!	#NULL!	#NULL!	#NULL!	1	Physical Therapy	0	#NULL!	#NULL!	#NULL!	#NULL!	#NULL!	#NULL!	#NULL!	#NULL!	#NULL!	#NULL!	#NULL!	#NULL!	#NULL!	#NULL!	#NULL!	#NULL!	#NULL!	#NULL!	#NULL!	#NULL!	#NULL!	#NULL!	#NULL!	#NULL!	1	5	#NULL!	#NULL!	#NULL!	#NULL!		3	3	3	3
2020-04-20 13:45:59	418	2020-04-20	Same	#NULL!	1	#NULL!	#NULL!	#NULL!	#NULL!	#NULL!	#NULL!	1	PT	0	#NULL!	#NULL!	#NULL!	#NULL!	#NULL!	#NULL!	#NULL!	#NULL!	#NULL!	#NULL!	#NULL!	#NULL!	#NULL!	#NULL!	#NULL!	#NULL!	#NULL!	#NULL!	#NULL!	#NULL!	#NULL!	#NULL!	#NULL!	#NULL!	1	4	#NULL!	#NULL!	#NULL!	#NULL!		3	3	3	3
2020-04-29 12:40:46	418	2020-04-29	Very tired, weak	#NULL!	1	#NULL!	#NULL!	#NULL!	#NULL!	#NULL!	#NULL!	#NULL!		1	4	4	4	5	1	2	2	2	1	2	2	1	5	5	2	2	3	3	3	3	3	3	3	3	1	5	#NULL!	#NULL!	#NULL!	#NULL!		3	4	3	4
2020-04-09 11:07:19	419	2020-04-09	Fine	#NULL!	1	#NULL!	1	#NULL!	#NULL!	#NULL!	#NULL!	#NULL!		0	#NULL!	#NULL!	#NULL!	#NULL!	#NULL!	#NULL!	#NULL!	#NULL!	#NULL!	#NULL!	#NULL!	#NULL!	#NULL!	#NULL!	#NULL!	#NULL!	#NULL!	#NULL!	#NULL!	#NULL!	#NULL!	#NULL!	#NULL!	#NULL!	1	3	#NULL!	#NULL!	#NULL!	#NULL!		2	1	1	1
2020-04-15 12:41:07	419	2020-04-15	good	#NULL!	1	#NULL!	1	#NULL!	#NULL!	#NULL!	#NULL!	#NULL!		0	#NULL!	#NULL!	#NULL!	#NULL!	#NULL!	#NULL!	#NULL!	#NULL!	#NULL!	#NULL!	#NULL!	#NULL!	#NULL!	#NULL!	#NULL!	#NULL!	#NULL!	#NULL!	#NULL!	#NULL!	#NULL!	#NULL!	#NULL!	#NULL!	1	0	#NULL!	#NULL!	#NULL!	#NULL!		#NULL!	#NULL!	#NULL!	#NULL!
2020-04-23 11:33:03	419	2020-04-23	Good	#NULL!	1	#NULL!	1	#NULL!	#NULL!	#NULL!	#NULL!	#NULL!		0	#NULL!	#NULL!	#NULL!	#NULL!	#NULL!	#NULL!	#NULL!	#NULL!	#NULL!	#NULL!	#NULL!	#NULL!	#NULL!	#NULL!	#NULL!	#NULL!	#NULL!	#NULL!	#NULL!	#NULL!	#NULL!	#NULL!	#NULL!	#NULL!	1	2	#NULL!	#NULL!	#NULL!	#NULL!		1	1	1	1
2020-04-09 10:31:40	421	2020-04-09	good	#NULL!	1	#NULL!	#NULL!	#NULL!	#NULL!	#NULL!	#NULL!	#NULL!		0	#NULL!	#NULL!	#NULL!	#NULL!	#NULL!	#NULL!	#NULL!	#NULL!	#NULL!	#NULL!	#NULL!	#NULL!	#NULL!	#NULL!	#NULL!	#NULL!	#NULL!	#NULL!	#NULL!	#NULL!	#NULL!	#NULL!	#NULL!	#NULL!	1	1	#NULL!	#NULL!	#NULL!	#NULL!		1	1	1	1
2020-04-15 12:17:57	421	2020-04-15	well	#NULL!	1	#NULL!	#NULL!	#NULL!	#NULL!	#NULL!	#NULL!	#NULL!		0	#NULL!	#NULL!	#NULL!	#NULL!	#NULL!	#NULL!	#NULL!	#NULL!	#NULL!	#NULL!	#NULL!	#NULL!	#NULL!	#NULL!	#NULL!	#NULL!	#NULL!	#NULL!	#NULL!	#NULL!	#NULL!	#NULL!	#NULL!	#NULL!	1	0	#NULL!	#NULL!	#NULL!	#NULL!		#NULL!	#NULL!	#NULL!	#NULL!
2020-04-23 11:59:37	421	2020-04-23	Good	#NULL!	1	#NULL!	#NULL!	#NULL!	#NULL!	#NULL!	#NULL!	#NULL!		0	#NULL!	#NULL!	#NULL!	#NULL!	#NULL!	#NULL!	#NULL!	#NULL!	#NULL!	#NULL!	#NULL!	#NULL!	#NULL!	#NULL!	#NULL!	#NULL!	#NULL!	#NULL!	#NULL!	#NULL!	#NULL!	#NULL!	#NULL!	#NULL!	1	4	#NULL!	#NULL!	#NULL!	#NULL!		1	1	1	1
2020-06-24 11:05:57	424	2020-06-19	very well over all	#NULL!	1	#NULL!	#NULL!	#NULL!	#NULL!	#NULL!	#NULL!	#NULL!		0	#NULL!	#NULL!	#NULL!	#NULL!	#NULL!	#NULL!	#NULL!	#NULL!	#NULL!	#NULL!	#NULL!	#NULL!	#NULL!	#NULL!	#NULL!	#NULL!	#NULL!	#NULL!	#NULL!	#NULL!	#NULL!	#NULL!	#NULL!	#NULL!	1	1	#NULL!	#NULL!	1	#NULL!	shoulder/back	1	2	1	2
2020-06-29 16:19:23	424	2020-06-26	feeling well overall	#NULL!	1	#NULL!	#NULL!	#NULL!	#NULL!	#NULL!	#NULL!	#NULL!		0	#NULL!	#NULL!	#NULL!	#NULL!	#NULL!	#NULL!	#NULL!	#NULL!	#NULL!	#NULL!	#NULL!	#NULL!	#NULL!	#NULL!	#NULL!	#NULL!	#NULL!	#NULL!	#NULL!	#NULL!	#NULL!	#NULL!	#NULL!	#NULL!	1	1	1	#NULL!	1	#NULL!	chest/scars tightness	1	2	1	2
2020-07-02 11:58:18	424	2020-07-02	very well overall	#NULL!	1	#NULL!	#NULL!	#NULL!	#NULL!	#NULL!	#NULL!	#NULL!		0	#NULL!	#NULL!	#NULL!	#NULL!	#NULL!	#NULL!	#NULL!	#NULL!	#NULL!	#NULL!	#NULL!	#NULL!	#NULL!	#NULL!	#NULL!	#NULL!	#NULL!	#NULL!	#NULL!	#NULL!	#NULL!	#NULL!	#NULL!	#NULL!	1	1	1	#NULL!	1	#NULL!	chest/scars	1	2	1	2
2020-07-20 13:32:18	424	2020-07-17	tired but well overall	#NULL!	1	#NULL!	#NULL!	#NULL!	#NULL!	#NULL!	#NULL!	#NULL!		0	#NULL!	#NULL!	#NULL!	#NULL!	#NULL!	#NULL!	#NULL!	#NULL!	#NULL!	#NULL!	#NULL!	#NULL!	#NULL!	#NULL!	#NULL!	#NULL!	#NULL!	#NULL!	#NULL!	#NULL!	#NULL!	#NULL!	#NULL!	#NULL!	1	2	#NULL!	#NULL!	1	#NULL!	chest	2	3	2	3
2020-07-24 13:55:57	424	2020-07-24	I'm doing well, overall. Some setbacks in range of motion from radiation but I was expecting it.	#NULL!	1	#NULL!	#NULL!	#NULL!	#NULL!	#NULL!	#NULL!	#NULL!		0	#NULL!	#NULL!	#NULL!	#NULL!	#NULL!	#NULL!	#NULL!	#NULL!	#NULL!	#NULL!	#NULL!	#NULL!	#NULL!	#NULL!	#NULL!	#NULL!	#NULL!	#NULL!	#NULL!	#NULL!	#NULL!	#NULL!	#NULL!	#NULL!	1	2	#NULL!	#NULL!	1	#NULL!	chest, armpit, radiated areas	2	3	1	3
2020-07-31 17:34:39	424	2020-07-30	well	#NULL!	1	#NULL!	#NULL!	#NULL!	#NULL!	#NULL!	#NULL!	#NULL!		0	#NULL!	#NULL!	#NULL!	#NULL!	#NULL!	#NULL!	#NULL!	#NULL!	#NULL!	#NULL!	#NULL!	#NULL!	#NULL!	#NULL!	#NULL!	#NULL!	#NULL!	#NULL!	#NULL!	#NULL!	#NULL!	#NULL!	#NULL!	#NULL!	1	1	#NULL!	#NULL!	1	#NULL!	chest/arm pit	1	2	1	2
2020-06-22 21:12:04	425	2020-06-22	good	#NULL!	1	1	#NULL!	#NULL!	#NULL!	#NULL!	#NULL!	#NULL!		1	1	1	1	1	1	2	2	2	1	1	2	1	2	2	2	2	4	3	2	2	3	2	2	3	1	1	#NULL!	#NULL!	#NULL!	#NULL!		2	2	2	2
2020-06-29 12:18:16	425	2020-06-29	good	#NULL!	1	1	#NULL!	#NULL!	#NULL!	#NULL!	#NULL!	#NULL!		0	#NULL!	#NULL!	#NULL!	#NULL!	#NULL!	#NULL!	#NULL!	#NULL!	#NULL!	#NULL!	#NULL!	#NULL!	#NULL!	#NULL!	#NULL!	#NULL!	#NULL!	#NULL!	#NULL!	#NULL!	#NULL!	#NULL!	#NULL!	#NULL!	1	1	#NULL!	1	#NULL!	#NULL!		1	1	1	1
2020-07-13 11:32:24	425	2020-07-13	good	#NULL!	1	1	#NULL!	#NULL!	#NULL!	#NULL!	#NULL!	#NULL!		0	#NULL!	#NULL!	#NULL!	#NULL!	#NULL!	#NULL!	#NULL!	#NULL!	#NULL!	#NULL!	#NULL!	#NULL!	#NULL!	#NULL!	#NULL!	#NULL!	#NULL!	#NULL!	#NULL!	#NULL!	#NULL!	#NULL!	#NULL!	#NULL!	1	0	#NULL!	#NULL!	#NULL!	#NULL!		#NULL!	#NULL!	#NULL!	#NULL!
2020-07-20 11:49:00	425	2020-07-20	good	#NULL!	1	1	#NULL!	#NULL!	#NULL!	#NULL!	#NULL!	#NULL!		0	#NULL!	#NULL!	#NULL!	#NULL!	#NULL!	#NULL!	#NULL!	#NULL!	#NULL!	#NULL!	#NULL!	#NULL!	#NULL!	#NULL!	#NULL!	#NULL!	#NULL!	#NULL!	#NULL!	#NULL!	#NULL!	#NULL!	#NULL!	#NULL!	1	1	#NULL!	#NULL!	1	#NULL!	back	1	2	1	2
2020-05-21 11:07:13	428	2020-05-21	tired	#NULL!	1	#NULL!	#NULL!	#NULL!	#NULL!	#NULL!	#NULL!	#NULL!		0	#NULL!	#NULL!	#NULL!	#NULL!	#NULL!	#NULL!	#NULL!	#NULL!	#NULL!	#NULL!	#NULL!	#NULL!	#NULL!	#NULL!	#NULL!	#NULL!	#NULL!	#NULL!	#NULL!	#NULL!	#NULL!	#NULL!	#NULL!	#NULL!	1	0	#NULL!	#NULL!	#NULL!	#NULL!		#NULL!	#NULL!	#NULL!	#NULL!
2020-05-28 13:34:32	428	2020-05-28	Fine, Not a lot of redness or irritation. A little sore.	#NULL!	1	#NULL!	1	#NULL!	#NULL!	#NULL!	#NULL!	#NULL!		0	#NULL!	#NULL!	#NULL!	#NULL!	#NULL!	#NULL!	#NULL!	#NULL!	#NULL!	#NULL!	#NULL!	#NULL!	#NULL!	#NULL!	#NULL!	#NULL!	#NULL!	#NULL!	#NULL!	#NULL!	#NULL!	#NULL!	#NULL!	#NULL!	1	0	#NULL!	#NULL!	#NULL!	#NULL!		#NULL!	#NULL!	#NULL!	#NULL!
2020-05-18 16:37:05	429	2020-05-18	Sinuses	#NULL!	1	#NULL!	#NULL!	#NULL!	#NULL!	#NULL!	#NULL!	#NULL!		0	#NULL!	#NULL!	#NULL!	#NULL!	#NULL!	#NULL!	#NULL!	#NULL!	#NULL!	#NULL!	#NULL!	#NULL!	#NULL!	#NULL!	#NULL!	#NULL!	#NULL!	#NULL!	#NULL!	#NULL!	#NULL!	#NULL!	#NULL!	#NULL!	2	8	#NULL!	#NULL!	#NULL!	#NULL!		1	1	1	1
2020-05-22 15:22:21	429	2020-05-22	Sinuses bothering due weather. Bone scan, results will come back in a week.	#NULL!	1	#NULL!	#NULL!	#NULL!	#NULL!	#NULL!	#NULL!	#NULL!		0	#NULL!	#NULL!	#NULL!	#NULL!	#NULL!	#NULL!	#NULL!	#NULL!	#NULL!	#NULL!	#NULL!	#NULL!	#NULL!	#NULL!	#NULL!	#NULL!	#NULL!	#NULL!	#NULL!	#NULL!	#NULL!	#NULL!	#NULL!	#NULL!	2	8	#NULL!	#NULL!	#NULL!	#NULL!		3	3	1	2
2020-06-26 11:34:46	430	2020-06-26	Pretty Good. 3 more treatments of radiation. 25 total radiation. Crease under breast is cracking. Nipple is very sore. Top of breast is very red.	#NULL!	1	#NULL!	1	#NULL!	#NULL!	#NULL!	#NULL!	#NULL!		0	#NULL!	#NULL!	#NULL!	#NULL!	#NULL!	#NULL!	#NULL!	#NULL!	#NULL!	#NULL!	#NULL!	#NULL!	#NULL!	#NULL!	#NULL!	#NULL!	#NULL!	#NULL!	#NULL!	#NULL!	#NULL!	#NULL!	#NULL!	#NULL!	1	5	#NULL!	1	#NULL!	#NULL!		1	1	1	1
2020-04-08 10:22:29	431	2020-03-08	Fine	#NULL!	1	1	#NULL!	1	#NULL!	#NULL!	#NULL!	#NULL!		0	#NULL!	#NULL!	#NULL!	#NULL!	#NULL!	#NULL!	#NULL!	#NULL!	#NULL!	#NULL!	#NULL!	#NULL!	#NULL!	#NULL!	#NULL!	#NULL!	#NULL!	#NULL!	#NULL!	#NULL!	#NULL!	#NULL!	#NULL!	#NULL!	1	4	#NULL!	#NULL!	#NULL!	#NULL!		2	1	2	2
2020-04-13 11:41:38	431	2020-04-13	Ok	#NULL!	1	1	#NULL!	1	#NULL!	#NULL!	#NULL!	#NULL!		0	#NULL!	#NULL!	#NULL!	#NULL!	#NULL!	#NULL!	#NULL!	#NULL!	#NULL!	#NULL!	#NULL!	#NULL!	#NULL!	#NULL!	#NULL!	#NULL!	#NULL!	#NULL!	#NULL!	#NULL!	#NULL!	#NULL!	#NULL!	#NULL!	1	2	#NULL!	#NULL!	#NULL!	#NULL!		2	2	1	2
2020-04-20 13:00:41	431	2020-04-20	Tired	#NULL!	1	1	#NULL!	1	#NULL!	#NULL!	#NULL!	#NULL!		0	#NULL!	#NULL!	#NULL!	#NULL!	#NULL!	#NULL!	#NULL!	#NULL!	#NULL!	#NULL!	#NULL!	#NULL!	#NULL!	#NULL!	#NULL!	#NULL!	#NULL!	#NULL!	#NULL!	#NULL!	#NULL!	#NULL!	#NULL!	#NULL!	1	2	#NULL!	#NULL!	#NULL!	#NULL!		2	1	1	1
2020-04-27 12:57:28	431	2020-04-27	Good	#NULL!	1	1	#NULL!	1	#NULL!	#NULL!	#NULL!	#NULL!		0	#NULL!	#NULL!	#NULL!	#NULL!	#NULL!	#NULL!	#NULL!	#NULL!	#NULL!	#NULL!	#NULL!	#NULL!	#NULL!	#NULL!	#NULL!	#NULL!	#NULL!	#NULL!	#NULL!	#NULL!	#NULL!	#NULL!	#NULL!	#NULL!	1	2	#NULL!	#NULL!	#NULL!	#NULL!		1	1	1	1
2020-05-11 13:07:03	431	2020-05-11	Tired	#NULL!	1	1	#NULL!	1	#NULL!	#NULL!	#NULL!	#NULL!		0	#NULL!	#NULL!	#NULL!	#NULL!	#NULL!	#NULL!	#NULL!	#NULL!	#NULL!	#NULL!	#NULL!	#NULL!	#NULL!	#NULL!	#NULL!	#NULL!	#NULL!	#NULL!	#NULL!	#NULL!	#NULL!	#NULL!	#NULL!	#NULL!	1	4	#NULL!	#NULL!	#NULL!	#NULL!		2	2	3	2
2020-05-19 17:06:23	431	2020-05-19	tired	#NULL!	1	1	#NULL!	1	#NULL!	#NULL!	#NULL!	#NULL!		0	#NULL!	#NULL!	#NULL!	#NULL!	#NULL!	#NULL!	#NULL!	#NULL!	#NULL!	#NULL!	#NULL!	#NULL!	#NULL!	#NULL!	#NULL!	#NULL!	#NULL!	#NULL!	#NULL!	#NULL!	#NULL!	#NULL!	#NULL!	#NULL!	1	2	#NULL!	#NULL!	#NULL!	#NULL!		1	1	1	1
2020-05-29 13:20:18	431	2020-05-29	Tired	#NULL!	1	1	#NULL!	1	#NULL!	#NULL!	#NULL!	#NULL!		0	#NULL!	#NULL!	#NULL!	#NULL!	#NULL!	#NULL!	#NULL!	#NULL!	#NULL!	#NULL!	#NULL!	#NULL!	#NULL!	#NULL!	#NULL!	#NULL!	#NULL!	#NULL!	#NULL!	#NULL!	#NULL!	#NULL!	#NULL!	#NULL!	1	2	#NULL!	#NULL!	#NULL!	#NULL!		1	1	1	1
2020-05-11 14:17:35	432	2020-05-11	Great	#NULL!	1	#NULL!	#NULL!	#NULL!	#NULL!	#NULL!	#NULL!	#NULL!		0	#NULL!	#NULL!	#NULL!	#NULL!	#NULL!	#NULL!	#NULL!	#NULL!	#NULL!	#NULL!	#NULL!	#NULL!	#NULL!	#NULL!	#NULL!	#NULL!	#NULL!	#NULL!	#NULL!	#NULL!	#NULL!	#NULL!	#NULL!	#NULL!	1	0	#NULL!	#NULL!	#NULL!	#NULL!		#NULL!	#NULL!	#NULL!	#NULL!
2020-05-18 15:46:33	432	2020-05-18	Good	#NULL!	1	#NULL!	#NULL!	#NULL!	#NULL!	#NULL!	#NULL!	#NULL!		1	1	1	1	1	1	1	1	1	1	1	1	1	2	2	2	2	5	5	1	1	1	1	1	1	1	0	#NULL!	#NULL!	#NULL!	#NULL!		#NULL!	#NULL!	#NULL!	#NULL!
2020-05-26 09:12:11	432	2020-05-26	Good	#NULL!	1	#NULL!	#NULL!	#NULL!	#NULL!	#NULL!	#NULL!	#NULL!		0	#NULL!	#NULL!	#NULL!	#NULL!	#NULL!	#NULL!	#NULL!	#NULL!	#NULL!	#NULL!	#NULL!	#NULL!	#NULL!	#NULL!	#NULL!	#NULL!	#NULL!	#NULL!	#NULL!	#NULL!	#NULL!	#NULL!	#NULL!	#NULL!	1	0	#NULL!	#NULL!	#NULL!	#NULL!		#NULL!	#NULL!	#NULL!	#NULL!
2020-06-18 09:44:05	435	2020-06-18	Finish next Wednesday. Feeling tender	#NULL!	1	#NULL!	#NULL!	#NULL!	#NULL!	#NULL!	#NULL!	#NULL!		0	#NULL!	#NULL!	#NULL!	#NULL!	#NULL!	#NULL!	#NULL!	#NULL!	#NULL!	#NULL!	#NULL!	#NULL!	#NULL!	#NULL!	#NULL!	#NULL!	#NULL!	#NULL!	#NULL!	#NULL!	#NULL!	#NULL!	#NULL!	#NULL!	1	2	#NULL!	#NULL!	#NULL!	#NULL!		1	1	1	1
2020-06-25 11:25:59	435	2020-06-25	good	#NULL!	1	#NULL!	#NULL!	#NULL!	#NULL!	#NULL!	#NULL!	#NULL!		0	#NULL!	#NULL!	#NULL!	#NULL!	#NULL!	#NULL!	#NULL!	#NULL!	#NULL!	#NULL!	#NULL!	#NULL!	#NULL!	#NULL!	#NULL!	#NULL!	#NULL!	#NULL!	#NULL!	#NULL!	#NULL!	#NULL!	#NULL!	#NULL!	1	1	#NULL!	1	#NULL!	#NULL!		2	2	2	2
2020-04-22 19:28:12	437	2020-04-22	migraines; anxiety; crying	#NULL!	1	#NULL!	#NULL!	#NULL!	#NULL!	#NULL!	#NULL!	#NULL!		1	4	3	3	3	4	4	4	4	1	1	4	1	5	5	4	5	2	2	4	4	5	5	3	5	1	6	#NULL!	#NULL!	#NULL!	#NULL!		5	5	5	5
2020-10-06 13:24:49	437	2020-04-15		#NULL!	1	#NULL!	#NULL!	#NULL!	#NULL!	#NULL!	#NULL!	#NULL!		1	3	3	3	3	4	4	4	4	3	3	5	3	4	4	4	4	2	3	3	3	3	3	3	5	2	8	1	#NULL!	1	#NULL!	Migraines	3	4	4	4
2020-06-30 10:54:22	438	2020-06-30	Only had one treatment so far, second treatment today.	#NULL!	1	#NULL!	#NULL!	#NULL!	#NULL!	#NULL!	#NULL!	#NULL!		0	#NULL!	#NULL!	#NULL!	#NULL!	#NULL!	#NULL!	#NULL!	#NULL!	#NULL!	#NULL!	#NULL!	#NULL!	#NULL!	#NULL!	#NULL!	#NULL!	#NULL!	#NULL!	#NULL!	#NULL!	#NULL!	#NULL!	#NULL!	#NULL!	1	0	#NULL!	#NULL!	#NULL!	#NULL!		#NULL!	#NULL!	#NULL!	#NULL!
2020-05-14 11:23:31	439	2020-05-14	Okay. Having pain from lyphadema.	#NULL!	1	#NULL!	#NULL!	#NULL!	#NULL!	#NULL!	#NULL!	#NULL!		0	#NULL!	#NULL!	#NULL!	#NULL!	#NULL!	#NULL!	#NULL!	#NULL!	#NULL!	#NULL!	#NULL!	#NULL!	#NULL!	#NULL!	#NULL!	#NULL!	#NULL!	#NULL!	#NULL!	#NULL!	#NULL!	#NULL!	#NULL!	#NULL!	2	7	#NULL!	#NULL!	#NULL!	#NULL!		3	2	1	1
2020-05-21 14:38:17	439	2020-05-21	Lymphedema in chest. More redness from radiation.	#NULL!	1	#NULL!	#NULL!	#NULL!	#NULL!	#NULL!	#NULL!	#NULL!		0	#NULL!	#NULL!	#NULL!	#NULL!	#NULL!	#NULL!	#NULL!	#NULL!	#NULL!	#NULL!	#NULL!	#NULL!	#NULL!	#NULL!	#NULL!	#NULL!	#NULL!	#NULL!	#NULL!	#NULL!	#NULL!	#NULL!	#NULL!	#NULL!	2	7	#NULL!	#NULL!	#NULL!	#NULL!		1	2	2	3
2020-06-18 10:06:42	439	2020-06-18	Feeling quite burned, they gave her a little break. 3 days total break and 5 days of radiation just area of cancer. Today she goes back for 7 full treatments.	#NULL!	1	#NULL!	#NULL!	#NULL!	#NULL!	#NULL!	#NULL!	#NULL!		0	#NULL!	#NULL!	#NULL!	#NULL!	#NULL!	#NULL!	#NULL!	#NULL!	#NULL!	#NULL!	#NULL!	#NULL!	#NULL!	#NULL!	#NULL!	#NULL!	#NULL!	#NULL!	#NULL!	#NULL!	#NULL!	#NULL!	#NULL!	#NULL!	1	5	#NULL!	#NULL!	#NULL!	#NULL!		4	4	4	4
2020-06-25 15:34:52	439	2020-06-25	In a lot of pain. One more treatment tomorrow.	#NULL!	1	#NULL!	#NULL!	#NULL!	#NULL!	#NULL!	#NULL!	#NULL!		0	#NULL!	#NULL!	#NULL!	#NULL!	#NULL!	#NULL!	#NULL!	#NULL!	#NULL!	#NULL!	#NULL!	#NULL!	#NULL!	#NULL!	#NULL!	#NULL!	#NULL!	#NULL!	#NULL!	#NULL!	#NULL!	#NULL!	#NULL!	#NULL!	2	8	#NULL!	1	#NULL!	#NULL!		4	4	4	4
2020-05-12 11:11:34	441	2020-05-12	very well	#NULL!	1	#NULL!	#NULL!	#NULL!	#NULL!	#NULL!	#NULL!	#NULL!		0	#NULL!	#NULL!	#NULL!	#NULL!	#NULL!	#NULL!	#NULL!	#NULL!	#NULL!	#NULL!	#NULL!	#NULL!	#NULL!	#NULL!	#NULL!	#NULL!	#NULL!	#NULL!	#NULL!	#NULL!	#NULL!	#NULL!	#NULL!	#NULL!	1	0	#NULL!	#NULL!	#NULL!	#NULL!		#NULL!	#NULL!	#NULL!	#NULL!
2020-05-19 11:39:02	441	2020-05-19	a little tired but fine	#NULL!	1	#NULL!	#NULL!	#NULL!	#NULL!	#NULL!	#NULL!	#NULL!		0	#NULL!	#NULL!	#NULL!	#NULL!	#NULL!	#NULL!	#NULL!	#NULL!	#NULL!	#NULL!	#NULL!	#NULL!	#NULL!	#NULL!	#NULL!	#NULL!	#NULL!	#NULL!	#NULL!	#NULL!	#NULL!	#NULL!	#NULL!	#NULL!	1	1	#NULL!	#NULL!	#NULL!	#NULL!		1	1	1	1
2020-05-26 12:28:39	441	2020-05-26	ok	#NULL!	1	#NULL!	#NULL!	#NULL!	#NULL!	#NULL!	#NULL!	#NULL!		1	1	1	1	1	1	1	1	1	1	1	1	1	3	2	2	2	4	3	1	1	1	1	1	1	1	0	#NULL!	#NULL!	#NULL!	#NULL!		#NULL!	#NULL!	#NULL!	#NULL!
2020-12-21 11:47:31	443	2020-12-21	Been okay	#NULL!	1	#NULL!	#NULL!	#NULL!	#NULL!	#NULL!	#NULL!	#NULL!		1	1	1	1	1	1	3	2	2	1	1	2	2	1	1	1	1	4	5	2	1	3	3	1	3	1	1	#NULL!	#NULL!	1	#NULL!	Knee	1	1	1	1
2021-01-04 11:13:56	443	2021-01-04	Okay, a little tired	#NULL!	1	#NULL!	#NULL!	#NULL!	#NULL!	#NULL!	#NULL!	#NULL!		1	1	1	1	1	1	2	1	1	1	1	1	1	3	2	1	3	4	4	1	1	5	5	1	5	1	1	#NULL!	#NULL!	1	#NULL!	Knee	1	1	1	1
2021-01-11 14:47:31	443	2021-01-11	Itchy	#NULL!	1	#NULL!	#NULL!	#NULL!	#NULL!	#NULL!	#NULL!	#NULL!		1	1	1	1	1	1	2	1	1	1	1	1	1	3	1	1	3	4	4	1	1	5	5	1	5	1	1	#NULL!	#NULL!	1	#NULL!	Knee	1	1	1	1
2020-12-17 11:48:24	445	2020-12-17	Fine, started radiation on Tuesday (12/15)	#NULL!	1	#NULL!	#NULL!	#NULL!	#NULL!	#NULL!	#NULL!	#NULL!		1	1	1	1	1	1	2	1	2	1	1	1	1	1	1	1	1	4	4	1	1	4	3	1	4	1	0	#NULL!	#NULL!	#NULL!	#NULL!		#NULL!	#NULL!	#NULL!	#NULL!
2020-12-22 13:54:08	445	2020-12-22	Good	#NULL!	1	#NULL!	#NULL!	#NULL!	#NULL!	#NULL!	#NULL!	#NULL!		1	1	1	1	1	1	1	2	2	1	1	1	1	1	1	1	1	4	4	1	1	4	4	1	4	2	8	#NULL!	#NULL!	1	#NULL!	Underneath her incision	1	1	1	1
2020-12-28 13:31:38	445	2020-12-28	Real good	#NULL!	1	#NULL!	#NULL!	#NULL!	#NULL!	#NULL!	#NULL!	#NULL!		1	1	1	1	1	1	1	1	1	1	1	1	1	1	1	1	1	4	4	1	1	4	4	1	4	1	4	#NULL!	1	#NULL!	#NULL!		1	1	1	1
2021-01-12 11:49:32	445	2021-01-12	Good	#NULL!	1	#NULL!	#NULL!	#NULL!	#NULL!	#NULL!	#NULL!	#NULL!		1	1	1	1	1	1	1	1	1	1	1	1	1	1	1	1	1	4	4	1	1	4	4	1	4	1	0	#NULL!	#NULL!	#NULL!	#NULL!		#NULL!	#NULL!	#NULL!	#NULL!
2021-01-19 14:17:57	445	2021-01-19	Real good	#NULL!	1	#NULL!	#NULL!	#NULL!	#NULL!	#NULL!	#NULL!	#NULL!		0	#NULL!	#NULL!	#NULL!	#NULL!	#NULL!	#NULL!	#NULL!	#NULL!	#NULL!	#NULL!	#NULL!	#NULL!	#NULL!	#NULL!	#NULL!	#NULL!	#NULL!	#NULL!	#NULL!	#NULL!	#NULL!	#NULL!	#NULL!	#NULL!	1	0	#NULL!	#NULL!	#NULL!	#NULL!		#NULL!	#NULL!	#NULL!	#NULL!
2020-12-21 13:32:24	447	2020-12-21	Good, tired	#NULL!	1	#NULL!	1	#NULL!	#NULL!	#NULL!	#NULL!	#NULL!		1	1	1	1	1	3	3	3	3	1	1	1	1	3	2	1	3	4	4	1	1	4	4	1	4	1	4	#NULL!	#NULL!	1	#NULL!	R upper thigh going down towards knee	1	1	1	1
2021-01-04 10:51:47	447	2021-01-04	Tired, run-down	#NULL!	1	#NULL!	1	#NULL!	#NULL!	#NULL!	#NULL!	#NULL!		1	1	1	1	1	1	1	1	1	1	1	1	1	3	2	2	3	4	4	2	1	4	4	1	4	1	0	#NULL!	#NULL!	#NULL!	#NULL!		#NULL!	#NULL!	#NULL!	#NULL!
2020-12-22 14:15:45	449	2020-12-22	Fine	#NULL!	1	#NULL!	#NULL!	#NULL!	#NULL!	#NULL!	#NULL!	#NULL!		0	#NULL!	#NULL!	#NULL!	#NULL!	#NULL!	#NULL!	#NULL!	#NULL!	#NULL!	#NULL!	#NULL!	#NULL!	#NULL!	#NULL!	#NULL!	#NULL!	#NULL!	#NULL!	#NULL!	#NULL!	#NULL!	#NULL!	#NULL!	#NULL!	1	0	#NULL!	#NULL!	#NULL!	#NULL!		#NULL!	#NULL!	#NULL!	#NULL!
2021-01-05 20:32:00	449	2021-01-05	Fine	#NULL!	1	#NULL!	#NULL!	#NULL!	#NULL!	#NULL!	#NULL!	#NULL!		1	1	1	1	1	1	1	1	1	1	1	1	1	1	1	1	1	4	3	1	1	2	4	1	4	1	5	#NULL!	#NULL!	1	#NULL!	R shoulder, R hip	1	1	1	1
2021-01-26 16:47:51	449	2021-01-26	Very tired	#NULL!	1	#NULL!	#NULL!	#NULL!	#NULL!	#NULL!	#NULL!	#NULL!		1	1	1	1	1	1	1	1	1	1	1	1	1	5	1	1	4	3	3	3	1	1	1	1	1	1	0	#NULL!	#NULL!	#NULL!	#NULL!		#NULL!	#NULL!	#NULL!	#NULL!
2021-01-19 16:55:34	452	2021-01-18	Good	#NULL!	1	#NULL!	#NULL!	#NULL!	#NULL!	#NULL!	#NULL!	#NULL!		0	#NULL!	#NULL!	#NULL!	#NULL!	#NULL!	#NULL!	#NULL!	#NULL!	#NULL!	#NULL!	#NULL!	#NULL!	#NULL!	#NULL!	#NULL!	#NULL!	#NULL!	#NULL!	#NULL!	#NULL!	#NULL!	#NULL!	#NULL!	#NULL!	1	0	#NULL!	#NULL!	#NULL!	#NULL!		#NULL!	#NULL!	#NULL!	#NULL!
2021-01-20 18:28:00	452	2021-01-20	Good	#NULL!	1	#NULL!	#NULL!	#NULL!	#NULL!	#NULL!	#NULL!	#NULL!		0	#NULL!	#NULL!	#NULL!	#NULL!	#NULL!	#NULL!	#NULL!	#NULL!	#NULL!	#NULL!	#NULL!	#NULL!	#NULL!	#NULL!	#NULL!	#NULL!	#NULL!	#NULL!	#NULL!	#NULL!	#NULL!	#NULL!	#NULL!	#NULL!	1	0	#NULL!	#NULL!	#NULL!	#NULL!		#NULL!	#NULL!	#NULL!	#NULL!
2021-01-13 09:22:59	455	2021-01-13	Slightly better	#NULL!	1	#NULL!	#NULL!	#NULL!	#NULL!	#NULL!	#NULL!	#NULL!		0	#NULL!	#NULL!	#NULL!	#NULL!	#NULL!	#NULL!	#NULL!	#NULL!	#NULL!	#NULL!	#NULL!	#NULL!	#NULL!	#NULL!	#NULL!	#NULL!	#NULL!	#NULL!	#NULL!	#NULL!	#NULL!	#NULL!	#NULL!	#NULL!	1	0	#NULL!	#NULL!	#NULL!	#NULL!		#NULL!	#NULL!	#NULL!	#NULL!
2021-01-20 13:50:16	455	2021-01-20	So-so	#NULL!	1	#NULL!	#NULL!	#NULL!	#NULL!	#NULL!	#NULL!	#NULL!		1	1	1	1	1	3	3	3	3	2	2	2	2	1	1	1	1	3	3	1	2	5	5	1	5	1	0	#NULL!	#NULL!	#NULL!	#NULL!		#NULL!	#NULL!	#NULL!	#NULL!
2021-01-27 14:37:45	455	2021-01-27	better	#NULL!	1	#NULL!	#NULL!	#NULL!	#NULL!	#NULL!	#NULL!	#NULL!		1	1	1	1	1	1	3	1	1	1	1	1	1	1	1	1	1	3	1	1	4	5	5	1	5	1	2	#NULL!	#NULL!	1	#NULL!	L underarm	1	1	1	1
2021-02-09 14:26:53	455	2021-02-09	Anxious and panicky	#NULL!	1	#NULL!	#NULL!	#NULL!	#NULL!	#NULL!	#NULL!	#NULL!		1	1	1	1	1	4	4	3	2	2	3	3	3	3	2	1	3	3	1	4	4	4	4	4	4	1	2	#NULL!	1	#NULL!	#NULL!		1	1	1	1
2020-12-23 14:25:03	456	2020-12-23	Good	#NULL!	1	#NULL!	#NULL!	#NULL!	#NULL!	#NULL!	#NULL!	#NULL!		1	5	1	1	1	1	1	1	1	1	1	1	1	1	1	1	1	3	2	2	3	5	5	1	5	1	0	#NULL!	#NULL!	#NULL!	#NULL!		#NULL!	#NULL!	#NULL!	#NULL!
2020-12-30 12:09:46	456	2020-12-30	Stomach virus late Sunday night, recovered now	#NULL!	1	#NULL!	#NULL!	#NULL!	#NULL!	#NULL!	#NULL!	#NULL!		1	5	1	1	1	1	3	1	1	1	1	1	1	2	1	1	2	3	2	2	2	5	5	1	5	1	0	#NULL!	#NULL!	#NULL!	#NULL!		#NULL!	#NULL!	#NULL!	#NULL!
2021-01-13 09:34:33	456	2021-01-13	Good	#NULL!	1	#NULL!	#NULL!	#NULL!	#NULL!	#NULL!	#NULL!	#NULL!		0	#NULL!	#NULL!	#NULL!	#NULL!	#NULL!	#NULL!	#NULL!	#NULL!	#NULL!	#NULL!	#NULL!	#NULL!	#NULL!	#NULL!	#NULL!	#NULL!	#NULL!	#NULL!	#NULL!	#NULL!	#NULL!	#NULL!	#NULL!	#NULL!	1	0	#NULL!	#NULL!	#NULL!	#NULL!		#NULL!	#NULL!	#NULL!	#NULL!
2021-01-20 14:30:04	456	2021-01-20	Just fine	#NULL!	1	#NULL!	#NULL!	#NULL!	#NULL!	#NULL!	#NULL!	#NULL!		1	1	1	1	1	1	1	1	1	1	1	1	1	2	1	1	1	2	1	3	3	5	3	1	5	1	0	#NULL!	#NULL!	#NULL!	#NULL!		#NULL!	#NULL!	#NULL!	#NULL!
2021-01-05 19:29:58	457	2021-01-05	Stressed	#NULL!	1	#NULL!	#NULL!	#NULL!	#NULL!	#NULL!	#NULL!	#NULL!		1	1	1	1	1	2	3	4	3	3	2	4	3	4	3	3	4	3	2	3	4	5	4	3	5	1	5	1	#NULL!	#NULL!	#NULL!		3	3	3	3
2021-01-20 19:05:38	457	2021-01-20	Okay	#NULL!	1	#NULL!	#NULL!	#NULL!	#NULL!	#NULL!	#NULL!	1	Physical therapy	0	#NULL!	#NULL!	#NULL!	#NULL!	#NULL!	#NULL!	#NULL!	#NULL!	#NULL!	#NULL!	#NULL!	#NULL!	#NULL!	#NULL!	#NULL!	#NULL!	#NULL!	#NULL!	#NULL!	#NULL!	#NULL!	#NULL!	#NULL!	#NULL!	1	5	1	#NULL!	#NULL!	#NULL!		2	2	2	2
2021-01-25 19:16:18	457	2021-01-25	Well	#NULL!	1	#NULL!	#NULL!	#NULL!	#NULL!	#NULL!	#NULL!	1	Physical therapy	0	#NULL!	#NULL!	#NULL!	#NULL!	#NULL!	#NULL!	#NULL!	#NULL!	#NULL!	#NULL!	#NULL!	#NULL!	#NULL!	#NULL!	#NULL!	#NULL!	#NULL!	#NULL!	#NULL!	#NULL!	#NULL!	#NULL!	#NULL!	#NULL!	1	3	1	#NULL!	#NULL!	#NULL!		1	1	1	1
2021-02-01 21:46:56	457	2021-02-01	Good	#NULL!	1	#NULL!	#NULL!	#NULL!	#NULL!	#NULL!	#NULL!	1	Physical therapy	0	#NULL!	#NULL!	#NULL!	#NULL!	#NULL!	#NULL!	#NULL!	#NULL!	#NULL!	#NULL!	#NULL!	#NULL!	#NULL!	#NULL!	#NULL!	#NULL!	#NULL!	#NULL!	#NULL!	#NULL!	#NULL!	#NULL!	#NULL!	#NULL!	1	2	1	#NULL!	#NULL!	#NULL!		1	1	1	1
2021-02-09 09:53:45	459	2021-02-09	Tired this morning	#NULL!	1	#NULL!	1	#NULL!	#NULL!	#NULL!	#NULL!	#NULL!		1	1	5	5	1	1	1	1	1	1	1	1	1	3	1	1	2	2	3	2	2	4	4	1	4	1	1	#NULL!	#NULL!	1	#NULL!	Knees	1	1	1	1
2021-02-15 11:37:00	459	2021-02-15	Okay	#NULL!	1	#NULL!	1	#NULL!	#NULL!	#NULL!	#NULL!	#NULL!		1	1	5	5	1	1	1	1	1	1	1	1	1	3	1	3	2	3	2	2	3	4	5	1	4	1	0	#NULL!	#NULL!	#NULL!	#NULL!		#NULL!	#NULL!	#NULL!	#NULL!
2021-01-21 12:59:46	460	2021-01-21	Pretty good	#NULL!	1	#NULL!	#NULL!	#NULL!	#NULL!	#NULL!	#NULL!	#NULL!		1	1	1	1	1	1	3	1	1	1	1	1	1	1	1	1	1	3	4	3	1	1	1	1	1	1	2	#NULL!	1	#NULL!	#NULL!		1	1	1	1
2018-08-02 09:47:04	172	2018-08-02	pretty good, but tired	#NULL!	#NULL!	#NULL!	1	#NULL!	#NULL!	#NULL!	#NULL!	#NULL!		0	#NULL!	#NULL!	#NULL!	#NULL!	#NULL!	#NULL!	#NULL!	#NULL!	#NULL!	#NULL!	#NULL!	#NULL!	#NULL!	#NULL!	#NULL!	#NULL!	#NULL!	#NULL!	#NULL!	#NULL!	#NULL!	#NULL!	#NULL!	#NULL!	1	3	#NULL!	#NULL!	#NULL!	#NULL!		#NULL!	#NULL!	#NULL!	#NULL!
2018-06-14 15:19:50	176	2018-07-14		1	#NULL!	#NULL!	#NULL!	#NULL!	#NULL!	#NULL!	#NULL!	#NULL!		#NULL!	1	1	1	1	1	1	1	1	1	1	1	1	1	1	1	1	5	5	1	1	1	1	1	1	1	0	#NULL!	#NULL!	#NULL!	#NULL!		1	1	1	1
2018-05-29 13:37:17	178	2018-05-29		#NULL!	#NULL!	#NULL!	1	#NULL!	#NULL!	#NULL!	#NULL!	#NULL!		#NULL!	2	1	2	1	1	1	1	1	1	1	1	1	2	1	1	1	5	5	1	1	1	1	1	1	1	1	#NULL!	#NULL!	#NULL!	#NULL!		2	2	1	1
2018-08-02 09:43:28	178	2018-08-02	tired, sleepy	#NULL!	#NULL!	#NULL!	1	#NULL!	#NULL!	#NULL!	#NULL!	#NULL!		0	#NULL!	#NULL!	#NULL!	#NULL!	#NULL!	#NULL!	#NULL!	#NULL!	#NULL!	#NULL!	#NULL!	#NULL!	#NULL!	#NULL!	#NULL!	#NULL!	#NULL!	#NULL!	#NULL!	#NULL!	#NULL!	#NULL!	#NULL!	#NULL!	1	1	#NULL!	#NULL!	#NULL!	#NULL!		#NULL!	#NULL!	#NULL!	#NULL!
2018-08-07 13:51:06	178	2018-08-07	Tired but ok and able to do my normal daily routine	#NULL!	#NULL!	#NULL!	1	#NULL!	#NULL!	#NULL!	#NULL!	#NULL!		0	#NULL!	#NULL!	#NULL!	#NULL!	#NULL!	#NULL!	#NULL!	#NULL!	#NULL!	#NULL!	#NULL!	#NULL!	#NULL!	#NULL!	#NULL!	#NULL!	#NULL!	#NULL!	#NULL!	#NULL!	#NULL!	#NULL!	#NULL!	#NULL!	1	2	#NULL!	#NULL!	#NULL!	#NULL!		1	2	1	2
2018-08-21 11:10:42	178	2018-08-21	I'm getting over cold cough. Got sick last week. Otherwise status quote.	#NULL!	#NULL!	#NULL!	1	#NULL!	#NULL!	#NULL!	#NULL!	#NULL!		0	#NULL!	#NULL!	#NULL!	#NULL!	#NULL!	#NULL!	#NULL!	#NULL!	#NULL!	#NULL!	#NULL!	#NULL!	#NULL!	#NULL!	#NULL!	#NULL!	#NULL!	#NULL!	#NULL!	#NULL!	#NULL!	#NULL!	#NULL!	#NULL!	1	2	#NULL!	#NULL!	#NULL!	#NULL!		2	2	2	2
2018-08-29 09:16:12	178	2018-08-29	Stronger every day	#NULL!	#NULL!	#NULL!	1	#NULL!	#NULL!	#NULL!	#NULL!	#NULL!		0	#NULL!	#NULL!	#NULL!	#NULL!	#NULL!	#NULL!	#NULL!	#NULL!	#NULL!	#NULL!	#NULL!	#NULL!	#NULL!	#NULL!	#NULL!	#NULL!	#NULL!	#NULL!	#NULL!	#NULL!	#NULL!	#NULL!	#NULL!	#NULL!	1	1	#NULL!	#NULL!	#NULL!	#NULL!		1	1	1	1
2018-09-10 12:15:55	178	2018-09-10	Well	#NULL!	#NULL!	#NULL!	1	#NULL!	#NULL!	#NULL!	#NULL!	#NULL!		0	#NULL!	#NULL!	#NULL!	#NULL!	#NULL!	#NULL!	#NULL!	#NULL!	#NULL!	#NULL!	#NULL!	#NULL!	#NULL!	#NULL!	#NULL!	#NULL!	#NULL!	#NULL!	#NULL!	#NULL!	#NULL!	#NULL!	#NULL!	#NULL!	1	1	#NULL!	#NULL!	#NULL!	#NULL!		1	1	1	1
2018-05-30 11:00:54	179	2018-05-30		1	#NULL!	#NULL!	#NULL!	#NULL!	#NULL!	#NULL!	#NULL!	#NULL!		#NULL!	2	2	1	2	3	2	2	3	1	2	2	1	2	2	2	2	3	3	4	4	2	3	2	2	1	2	#NULL!	#NULL!	#NULL!	#NULL!		2	2	1	2
2018-10-17 12:18:00	179	2018-10-17	good	1	#NULL!	#NULL!	#NULL!	#NULL!	#NULL!	#NULL!	#NULL!	#NULL!		0	#NULL!	#NULL!	#NULL!	#NULL!	#NULL!	#NULL!	#NULL!	#NULL!	#NULL!	#NULL!	#NULL!	#NULL!	#NULL!	#NULL!	#NULL!	#NULL!	#NULL!	#NULL!	#NULL!	#NULL!	#NULL!	#NULL!	#NULL!	#NULL!	1	0	#NULL!	#NULL!	#NULL!	#NULL!		#NULL!	#NULL!	#NULL!	#NULL!
2018-10-23 11:29:57	179	2018-10-23	Very good	1	#NULL!	#NULL!	#NULL!	#NULL!	#NULL!	#NULL!	#NULL!	#NULL!		1	2	3	2	1	1	3	2	1	1	2	1	1	2	1	2	2	2	2	4	4	2	2	2	2	1	0	#NULL!	#NULL!	#NULL!	#NULL!		#NULL!	#NULL!	#NULL!	#NULL!
2018-07-30 10:47:21	185	2018-07-30		#NULL!	#NULL!	#NULL!	#NULL!	#NULL!	#NULL!	#NULL!	#NULL!	#NULL!		0	2	1	1	1	1	4	1	3	1	1	3	1	3	2	2	2	3	3	4	1	3	3	3	1	#NULL!	#NULL!	#NULL!	#NULL!	#NULL!	#NULL!		2	1	1	2
2018-08-08 09:29:15	185	2018-08-08	pretty good, some tiredness	#NULL!	#NULL!	#NULL!	#NULL!	#NULL!	#NULL!	#NULL!	#NULL!	#NULL!		1	1	1	1	1	3	3	4	4	2	3	5	3	2	1	2	2	3	1	3	1	3	3	3	3	1	6	#NULL!	#NULL!	#NULL!	#NULL!		3	3	3	#NULL!
2018-08-14 13:06:28	185	2018-08-14	A little depressed	#NULL!	#NULL!	#NULL!	#NULL!	#NULL!	#NULL!	#NULL!	#NULL!	#NULL!		1	2	1	1	1	3	4	4	4	1	2	4	2	3	3	2	3	3	1	4	1	3	3	3	3	1	0	#NULL!	#NULL!	#NULL!	#NULL!		#NULL!	#NULL!	#NULL!	#NULL!
2018-08-20 14:48:04	185	2018-08-20	Good	#NULL!	#NULL!	#NULL!	#NULL!	#NULL!	#NULL!	#NULL!	#NULL!	#NULL!		1	1	1	1	1	3	3	3	3	1	1	3	2	3	2	2	2	3	2	3	3	3	3	3	3	1	1	#NULL!	#NULL!	#NULL!	#NULL!		1	1	1	1
2018-08-27 11:29:48	185	2018-08-27	SAD	#NULL!	#NULL!	#NULL!	#NULL!	#NULL!	#NULL!	#NULL!	#NULL!	#NULL!		1	3	1	1	1	3	4	4	4	2	4	4	3	2	2	2	3	2	1	4	2	3	3	3	3	1	1	#NULL!	#NULL!	#NULL!	#NULL!		1	1	1	1
2018-09-10 11:22:30	185	2018-09-10	Tired	#NULL!	#NULL!	#NULL!	#NULL!	#NULL!	#NULL!	#NULL!	#NULL!	#NULL!		1	2	1	1	1	3	3	3	4	1	4	5	4	4	4	3	3	2	1	4	2	3	3	3	3	1	1	#NULL!	#NULL!	#NULL!	#NULL!		1	1	1	1
2018-09-17 15:36:29	185	2018-09-17	Tired	#NULL!	#NULL!	1	#NULL!	#NULL!	#NULL!	#NULL!	#NULL!	#NULL!		0	#NULL!	#NULL!	#NULL!	#NULL!	#NULL!	#NULL!	#NULL!	#NULL!	#NULL!	#NULL!	#NULL!	#NULL!	#NULL!	#NULL!	#NULL!	#NULL!	#NULL!	#NULL!	#NULL!	#NULL!	#NULL!	#NULL!	#NULL!	#NULL!	1	0	#NULL!	#NULL!	#NULL!	#NULL!		#NULL!	#NULL!	#NULL!	#NULL!
2018-09-25 10:48:19	185	2018-09-25	Tired but ok	#NULL!	#NULL!	1	#NULL!	#NULL!	#NULL!	#NULL!	#NULL!	#NULL!		1	2	2	2	2	3	3	3	3	2	2	4	3	5	5	4	5	2	1	5	3	3	3	4	4	1	0	#NULL!	#NULL!	#NULL!	#NULL!		#NULL!	#NULL!	#NULL!	#NULL!
2018-10-08 11:46:30	185	2018-10-08	Blah	#NULL!	#NULL!	1	#NULL!	#NULL!	#NULL!	#NULL!	#NULL!	#NULL!		0	#NULL!	#NULL!	#NULL!	#NULL!	#NULL!	#NULL!	#NULL!	#NULL!	#NULL!	#NULL!	#NULL!	#NULL!	#NULL!	#NULL!	#NULL!	#NULL!	#NULL!	#NULL!	#NULL!	#NULL!	#NULL!	#NULL!	#NULL!	#NULL!	1	0	#NULL!	#NULL!	#NULL!	#NULL!		#NULL!	#NULL!	#NULL!	#NULL!
2018-10-15 14:00:17	185	2018-10-15	Other than tired, good	#NULL!	#NULL!	1	#NULL!	#NULL!	#NULL!	#NULL!	#NULL!	#NULL!		0	#NULL!	#NULL!	#NULL!	#NULL!	#NULL!	#NULL!	#NULL!	#NULL!	#NULL!	#NULL!	#NULL!	#NULL!	#NULL!	#NULL!	#NULL!	#NULL!	#NULL!	#NULL!	#NULL!	#NULL!	#NULL!	#NULL!	#NULL!	#NULL!	1	1	#NULL!	#NULL!	#NULL!	#NULL!		1	1	1	1
2018-10-23 13:54:03	185	2018-10-23	OK	#NULL!	#NULL!	1	#NULL!	#NULL!	#NULL!	#NULL!	#NULL!	#NULL!		0	#NULL!	#NULL!	#NULL!	#NULL!	#NULL!	#NULL!	#NULL!	#NULL!	#NULL!	#NULL!	#NULL!	#NULL!	#NULL!	#NULL!	#NULL!	#NULL!	#NULL!	#NULL!	#NULL!	#NULL!	#NULL!	#NULL!	#NULL!	#NULL!	1	0	#NULL!	#NULL!	#NULL!	#NULL!		#NULL!	#NULL!	#NULL!	#NULL!
2018-11-05 16:24:39	185	2018-11-05	Tired	#NULL!	#NULL!	1	#NULL!	#NULL!	#NULL!	#NULL!	#NULL!	#NULL!		0	#NULL!	#NULL!	#NULL!	#NULL!	#NULL!	#NULL!	#NULL!	#NULL!	#NULL!	#NULL!	#NULL!	#NULL!	#NULL!	#NULL!	#NULL!	#NULL!	#NULL!	#NULL!	#NULL!	#NULL!	#NULL!	#NULL!	#NULL!	#NULL!	1	0	#NULL!	#NULL!	#NULL!	#NULL!		#NULL!	#NULL!	#NULL!	#NULL!
2018-11-12 13:38:53	185	2018-11-12	ok	#NULL!	#NULL!	1	#NULL!	#NULL!	#NULL!	#NULL!	#NULL!	#NULL!		0	#NULL!	#NULL!	#NULL!	#NULL!	#NULL!	#NULL!	#NULL!	#NULL!	#NULL!	#NULL!	#NULL!	#NULL!	#NULL!	#NULL!	#NULL!	#NULL!	#NULL!	#NULL!	#NULL!	#NULL!	#NULL!	#NULL!	#NULL!	#NULL!	1	0	#NULL!	#NULL!	#NULL!	#NULL!		#NULL!	#NULL!	#NULL!	#NULL!
2018-11-19 13:27:40	185	2018-11-19	Tired	1	#NULL!	#NULL!	#NULL!	#NULL!	#NULL!	#NULL!	#NULL!	#NULL!		#NULL!	#NULL!	#NULL!	#NULL!	#NULL!	#NULL!	#NULL!	#NULL!	#NULL!	#NULL!	#NULL!	#NULL!	#NULL!	#NULL!	#NULL!	#NULL!	#NULL!	#NULL!	#NULL!	#NULL!	#NULL!	#NULL!	#NULL!	#NULL!	#NULL!	1	0	#NULL!	#NULL!	#NULL!	#NULL!		#NULL!	#NULL!	#NULL!	#NULL!
2018-11-26 16:22:44	185	2018-11-26	OK	1	#NULL!	#NULL!	#NULL!	#NULL!	#NULL!	#NULL!	#NULL!	#NULL!		#NULL!	#NULL!	#NULL!	#NULL!	#NULL!	#NULL!	#NULL!	#NULL!	#NULL!	#NULL!	#NULL!	#NULL!	#NULL!	#NULL!	#NULL!	#NULL!	#NULL!	#NULL!	#NULL!	#NULL!	#NULL!	#NULL!	#NULL!	#NULL!	#NULL!	1	0	#NULL!	#NULL!	#NULL!	#NULL!		#NULL!	#NULL!	#NULL!	#NULL!
2018-12-10 17:44:04	185	2018-12-10	Fine	1	#NULL!	#NULL!	#NULL!	#NULL!	#NULL!	#NULL!	#NULL!	#NULL!		#NULL!	#NULL!	#NULL!	#NULL!	#NULL!	#NULL!	#NULL!	#NULL!	#NULL!	#NULL!	#NULL!	#NULL!	#NULL!	#NULL!	#NULL!	#NULL!	#NULL!	#NULL!	#NULL!	#NULL!	#NULL!	#NULL!	#NULL!	#NULL!	#NULL!	1	0	#NULL!	#NULL!	#NULL!	#NULL!		#NULL!	#NULL!	#NULL!	#NULL!
2019-02-22 13:34:31	185	2019-02-22	good	1	#NULL!	#NULL!	#NULL!	#NULL!	#NULL!	#NULL!	#NULL!	#NULL!		0	#NULL!	#NULL!	#NULL!	#NULL!	#NULL!	#NULL!	#NULL!	#NULL!	#NULL!	#NULL!	#NULL!	#NULL!	#NULL!	#NULL!	#NULL!	#NULL!	#NULL!	#NULL!	#NULL!	#NULL!	#NULL!	#NULL!	#NULL!	#NULL!	1	0	#NULL!	#NULL!	#NULL!	#NULL!		#NULL!	#NULL!	#NULL!	#NULL!
2018-08-22 17:12:23	186	2018-08-22	Good. A bit tired.	#NULL!	#NULL!	#NULL!	#NULL!	#NULL!	#NULL!	#NULL!	#NULL!	#NULL!		0	#NULL!	#NULL!	#NULL!	#NULL!	#NULL!	#NULL!	#NULL!	#NULL!	#NULL!	#NULL!	#NULL!	#NULL!	#NULL!	#NULL!	#NULL!	#NULL!	#NULL!	#NULL!	#NULL!	#NULL!	#NULL!	#NULL!	#NULL!	#NULL!	1	3	#NULL!	#NULL!	#NULL!	#NULL!		1	1	1	1
2018-08-27 13:47:23	186	2018-08-27	Good	#NULL!	#NULL!	#NULL!	#NULL!	#NULL!	#NULL!	#NULL!	#NULL!	#NULL!		0	#NULL!	#NULL!	#NULL!	#NULL!	#NULL!	#NULL!	#NULL!	#NULL!	#NULL!	#NULL!	#NULL!	#NULL!	#NULL!	#NULL!	#NULL!	#NULL!	#NULL!	#NULL!	#NULL!	#NULL!	#NULL!	#NULL!	#NULL!	#NULL!	1	3	#NULL!	#NULL!	#NULL!	#NULL!		1	1	1	1
2018-09-10 14:48:42	186	2018-09-10	Good	#NULL!	#NULL!	#NULL!	#NULL!	#NULL!	#NULL!	#NULL!	#NULL!	#NULL!		0	#NULL!	#NULL!	#NULL!	#NULL!	#NULL!	#NULL!	#NULL!	#NULL!	#NULL!	#NULL!	#NULL!	#NULL!	#NULL!	#NULL!	#NULL!	#NULL!	#NULL!	#NULL!	#NULL!	#NULL!	#NULL!	#NULL!	#NULL!	#NULL!	1	2	#NULL!	#NULL!	#NULL!	#NULL!		1	1	1	1
2018-09-17 19:42:34	186	2018-09-17	Good	1	#NULL!	#NULL!	#NULL!	#NULL!	#NULL!	#NULL!	#NULL!	#NULL!		0	#NULL!	#NULL!	#NULL!	#NULL!	#NULL!	#NULL!	#NULL!	#NULL!	#NULL!	#NULL!	#NULL!	#NULL!	#NULL!	#NULL!	#NULL!	#NULL!	#NULL!	#NULL!	#NULL!	#NULL!	#NULL!	#NULL!	#NULL!	#NULL!	1	2	#NULL!	#NULL!	#NULL!	#NULL!		1	1	1	1
2018-09-27 15:41:22	186	2018-09-27	Good	1	#NULL!	#NULL!	#NULL!	#NULL!	#NULL!	#NULL!	#NULL!	#NULL!		0	#NULL!	#NULL!	#NULL!	#NULL!	#NULL!	#NULL!	#NULL!	#NULL!	#NULL!	#NULL!	#NULL!	#NULL!	#NULL!	#NULL!	#NULL!	#NULL!	#NULL!	#NULL!	#NULL!	#NULL!	#NULL!	#NULL!	#NULL!	#NULL!	1	2	#NULL!	#NULL!	#NULL!	#NULL!		1	1	1	1
2018-10-08 08:30:45	186	2018-10-08	Fair. Sore throat and cold symptoms	1	#NULL!	#NULL!	#NULL!	#NULL!	#NULL!	#NULL!	#NULL!	#NULL!		0	#NULL!	#NULL!	#NULL!	#NULL!	#NULL!	#NULL!	#NULL!	#NULL!	#NULL!	#NULL!	#NULL!	#NULL!	#NULL!	#NULL!	#NULL!	#NULL!	#NULL!	#NULL!	#NULL!	#NULL!	#NULL!	#NULL!	#NULL!	#NULL!	1	0	#NULL!	#NULL!	#NULL!	#NULL!		#NULL!	#NULL!	#NULL!	#NULL!
2018-10-15 19:41:55	186	2018-10-15	Good. Tired at times	1	#NULL!	#NULL!	#NULL!	#NULL!	#NULL!	#NULL!	#NULL!	#NULL!		0	#NULL!	#NULL!	#NULL!	#NULL!	#NULL!	#NULL!	#NULL!	#NULL!	#NULL!	#NULL!	#NULL!	#NULL!	#NULL!	#NULL!	#NULL!	#NULL!	#NULL!	#NULL!	#NULL!	#NULL!	#NULL!	#NULL!	#NULL!	#NULL!	1	0	#NULL!	#NULL!	#NULL!	#NULL!		#NULL!	#NULL!	#NULL!	#NULL!
2018-10-30 11:47:57	187	2018-10-23		1	#NULL!	#NULL!	#NULL!	#NULL!	#NULL!	#NULL!	#NULL!	#NULL!		0	#NULL!	#NULL!	#NULL!	#NULL!	#NULL!	#NULL!	#NULL!	#NULL!	#NULL!	#NULL!	#NULL!	#NULL!	#NULL!	#NULL!	#NULL!	#NULL!	#NULL!	#NULL!	#NULL!	#NULL!	#NULL!	#NULL!	#NULL!	#NULL!	2	7	#NULL!	#NULL!	#NULL!	#NULL!		4	3	3	3
2018-08-14 10:15:38	192	2018-08-14	good	#NULL!	#NULL!	#NULL!	#NULL!	#NULL!	#NULL!	#NULL!	#NULL!	#NULL!		0	#NULL!	#NULL!	#NULL!	#NULL!	#NULL!	#NULL!	#NULL!	#NULL!	#NULL!	#NULL!	#NULL!	#NULL!	#NULL!	#NULL!	#NULL!	#NULL!	#NULL!	#NULL!	#NULL!	#NULL!	#NULL!	#NULL!	#NULL!	#NULL!	1	2	#NULL!	#NULL!	#NULL!	#NULL!		1	1	1	1
2018-10-23 10:11:36	192	2018-10-09	Feeling Fine, Having no issues	#NULL!	#NULL!	#NULL!	1	#NULL!	#NULL!	#NULL!	#NULL!	#NULL!		1	1	1	1	1	1	1	2	2	1	1	1	1	3	3	3	3	4	4	2	2	2	2	2	1	1	0	#NULL!	#NULL!	#NULL!	#NULL!		#NULL!	#NULL!	#NULL!	#NULL!
2018-10-24 12:35:11	192	2018-10-24		#NULL!	#NULL!	#NULL!	#NULL!	#NULL!	#NULL!	#NULL!	#NULL!	#NULL!		0	#NULL!	#NULL!	#NULL!	#NULL!	#NULL!	#NULL!	#NULL!	#NULL!	#NULL!	#NULL!	#NULL!	#NULL!	#NULL!	#NULL!	#NULL!	#NULL!	#NULL!	#NULL!	#NULL!	#NULL!	#NULL!	#NULL!	#NULL!	#NULL!	#NULL!	#NULL!	#NULL!	#NULL!	#NULL!	#NULL!		#NULL!	#NULL!	#NULL!	#NULL!
2018-10-27 14:37:10	192	#NULL!	Fine	#NULL!	#NULL!	#NULL!	1	#NULL!	#NULL!	#NULL!	#NULL!	#NULL!		0	#NULL!	#NULL!	#NULL!	#NULL!	#NULL!	#NULL!	#NULL!	#NULL!	#NULL!	#NULL!	#NULL!	#NULL!	#NULL!	#NULL!	#NULL!	#NULL!	#NULL!	#NULL!	#NULL!	#NULL!	#NULL!	#NULL!	#NULL!	#NULL!	1	0	#NULL!	#NULL!	#NULL!	#NULL!		#NULL!	#NULL!	#NULL!	#NULL!
2018-10-30 10:44:15	192	2018-10-21	fine	#NULL!	#NULL!	#NULL!	1	#NULL!	#NULL!	#NULL!	#NULL!	#NULL!		0	#NULL!	#NULL!	#NULL!	#NULL!	#NULL!	#NULL!	#NULL!	#NULL!	#NULL!	#NULL!	#NULL!	#NULL!	#NULL!	#NULL!	#NULL!	#NULL!	#NULL!	#NULL!	#NULL!	#NULL!	#NULL!	#NULL!	#NULL!	#NULL!	1	0	#NULL!	#NULL!	#NULL!	#NULL!		#NULL!	#NULL!	#NULL!	#NULL!
2018-10-30 12:06:14	192	2018-10-09	I feel fine. Having no issues	#NULL!	#NULL!	#NULL!	1	#NULL!	#NULL!	#NULL!	#NULL!	#NULL!		0	#NULL!	#NULL!	#NULL!	#NULL!	#NULL!	#NULL!	#NULL!	#NULL!	#NULL!	#NULL!	#NULL!	#NULL!	#NULL!	#NULL!	#NULL!	#NULL!	#NULL!	#NULL!	#NULL!	#NULL!	#NULL!	#NULL!	#NULL!	#NULL!	1	0	#NULL!	#NULL!	#NULL!	#NULL!		#NULL!	#NULL!	#NULL!	#NULL!
2018-08-02 09:56:19	193	2018-08-02	perfect- no problems!!	#NULL!	#NULL!	#NULL!	#NULL!	#NULL!	#NULL!	#NULL!	#NULL!	#NULL!		0	#NULL!	#NULL!	#NULL!	#NULL!	#NULL!	#NULL!	#NULL!	#NULL!	#NULL!	#NULL!	#NULL!	#NULL!	#NULL!	#NULL!	#NULL!	#NULL!	#NULL!	#NULL!	#NULL!	#NULL!	#NULL!	#NULL!	#NULL!	#NULL!	1	0	#NULL!	#NULL!	#NULL!	#NULL!		#NULL!	#NULL!	#NULL!	#NULL!
2018-08-06 15:21:31	194	2018-08-06	very good	#NULL!	#NULL!	#NULL!	#NULL!	#NULL!	#NULL!	#NULL!	#NULL!	#NULL!		0	#NULL!	#NULL!	#NULL!	#NULL!	#NULL!	#NULL!	#NULL!	#NULL!	#NULL!	#NULL!	#NULL!	#NULL!	#NULL!	#NULL!	#NULL!	#NULL!	#NULL!	#NULL!	#NULL!	#NULL!	#NULL!	#NULL!	#NULL!	#NULL!	1	3	#NULL!	#NULL!	#NULL!	#NULL!		#NULL!	#NULL!	#NULL!	#NULL!
2018-08-30 09:37:07	194	2018-08-30	good. tired	#NULL!	#NULL!	#NULL!	#NULL!	#NULL!	#NULL!	#NULL!	#NULL!	#NULL!		0	#NULL!	#NULL!	#NULL!	#NULL!	#NULL!	#NULL!	#NULL!	#NULL!	#NULL!	#NULL!	#NULL!	#NULL!	#NULL!	#NULL!	#NULL!	#NULL!	#NULL!	#NULL!	#NULL!	#NULL!	#NULL!	#NULL!	#NULL!	#NULL!	1	2	#NULL!	#NULL!	#NULL!	#NULL!		1	1	1	1
2018-09-11 09:33:47	194	2018-09-11	okay. fine	#NULL!	#NULL!	#NULL!	#NULL!	#NULL!	#NULL!	#NULL!	#NULL!	#NULL!		0	#NULL!	#NULL!	#NULL!	#NULL!	#NULL!	#NULL!	#NULL!	#NULL!	#NULL!	#NULL!	#NULL!	#NULL!	#NULL!	#NULL!	#NULL!	#NULL!	#NULL!	#NULL!	#NULL!	#NULL!	#NULL!	#NULL!	#NULL!	#NULL!	1	2	#NULL!	#NULL!	#NULL!	#NULL!		1	1	1	1
2018-10-23 10:17:31	194	2018-09-18	Tired	1	#NULL!	#NULL!	#NULL!	#NULL!	#NULL!	#NULL!	#NULL!	#NULL!		1	1	1	1	1	3	2	1	1	1	1	1	1	3	2	2	2	2	3	3	2	2	2	2	2	1	2	#NULL!	#NULL!	#NULL!	#NULL!		1	1	1	1
2018-08-02 12:01:23	195	2018-08-02	fine. had CT scan on tues., waiting for call	#NULL!	#NULL!	#NULL!	#NULL!	#NULL!	#NULL!	#NULL!	#NULL!	#NULL!		0	#NULL!	#NULL!	#NULL!	#NULL!	#NULL!	#NULL!	#NULL!	#NULL!	#NULL!	#NULL!	#NULL!	#NULL!	#NULL!	#NULL!	#NULL!	#NULL!	#NULL!	#NULL!	#NULL!	#NULL!	#NULL!	#NULL!	#NULL!	#NULL!	1	4	#NULL!	#NULL!	#NULL!	#NULL!		#NULL!	#NULL!	#NULL!	#NULL!
2018-08-07 10:17:32	195	2018-08-07		#NULL!	#NULL!	#NULL!	#NULL!	#NULL!	#NULL!	#NULL!	#NULL!	#NULL!		1	4	2	2	2	2	1	1	3	1	1	1	1	2	2	2	2	4	4	3	3	1	2	4	2	1	4	#NULL!	#NULL!	#NULL!	#NULL!		3	#NULL!	2	3
2018-08-21 10:03:30	195	2018-08-21	having more trouble with eyes	#NULL!	#NULL!	#NULL!	#NULL!	#NULL!	#NULL!	#NULL!	#NULL!	#NULL!		0	#NULL!	#NULL!	#NULL!	#NULL!	#NULL!	#NULL!	#NULL!	#NULL!	#NULL!	#NULL!	#NULL!	#NULL!	#NULL!	#NULL!	#NULL!	#NULL!	#NULL!	#NULL!	#NULL!	#NULL!	#NULL!	#NULL!	#NULL!	#NULL!	1	3	#NULL!	#NULL!	#NULL!	#NULL!		2	2	2	2
2018-08-27 11:45:24	195	2018-08-27	going ok	#NULL!	#NULL!	#NULL!	#NULL!	#NULL!	#NULL!	#NULL!	#NULL!	#NULL!		0	#NULL!	#NULL!	#NULL!	#NULL!	#NULL!	#NULL!	#NULL!	#NULL!	#NULL!	#NULL!	#NULL!	#NULL!	#NULL!	#NULL!	#NULL!	#NULL!	#NULL!	#NULL!	#NULL!	#NULL!	#NULL!	#NULL!	#NULL!	#NULL!	1	6	#NULL!	#NULL!	#NULL!	#NULL!		4	4	4	4
2018-09-28 10:57:21	195	2018-09-28	okay	1	#NULL!	#NULL!	#NULL!	#NULL!	#NULL!	#NULL!	#NULL!	#NULL!		1	4	1	1	3	3	1	1	2	1	1	2	1	2	2	1	2	4	4	2	2	1	1	2	1	1	3	#NULL!	#NULL!	#NULL!	#NULL!		1	1	1	1
2018-10-16 09:59:00	195	2018-10-16	good	1	#NULL!	#NULL!	#NULL!	#NULL!	#NULL!	#NULL!	#NULL!	#NULL!		1	4	1	1	1	3	1	1	3	1	2	2	1	2	2	2	2	4	4	2	3	2	1	1	1	1	2	#NULL!	#NULL!	#NULL!	#NULL!		1	2	1	2
2018-07-30 12:57:02	198	2018-07-30	some pain. numbness under arm. hardened lump area -seroma needs to be absorbed	#NULL!	#NULL!	#NULL!	#NULL!	#NULL!	#NULL!	#NULL!	#NULL!	#NULL!		0	#NULL!	#NULL!	#NULL!	#NULL!	#NULL!	#NULL!	#NULL!	#NULL!	#NULL!	#NULL!	#NULL!	#NULL!	#NULL!	#NULL!	#NULL!	#NULL!	#NULL!	#NULL!	#NULL!	#NULL!	#NULL!	#NULL!	#NULL!	#NULL!	1	3	#NULL!	#NULL!	#NULL!	#NULL!		#NULL!	#NULL!	#NULL!	#NULL!
2018-08-08 07:21:47	198	2018-08-08	Great. Minimal pain at this time, still numbness under arm where lymph nodes were removed.	#NULL!	#NULL!	#NULL!	#NULL!	#NULL!	#NULL!	#NULL!	#NULL!	#NULL!		0	#NULL!	#NULL!	#NULL!	#NULL!	#NULL!	#NULL!	#NULL!	#NULL!	#NULL!	#NULL!	#NULL!	#NULL!	#NULL!	#NULL!	#NULL!	#NULL!	#NULL!	#NULL!	#NULL!	#NULL!	#NULL!	#NULL!	#NULL!	#NULL!	1	1	#NULL!	#NULL!	#NULL!	#NULL!		2	2	1	2
2018-08-20 13:45:04	198	2018-08-20	Great. Still some numbness under my arm though.	#NULL!	#NULL!	#NULL!	#NULL!	#NULL!	#NULL!	#NULL!	#NULL!	#NULL!		0	#NULL!	#NULL!	#NULL!	#NULL!	#NULL!	#NULL!	#NULL!	#NULL!	#NULL!	#NULL!	#NULL!	#NULL!	#NULL!	#NULL!	#NULL!	#NULL!	#NULL!	#NULL!	#NULL!	#NULL!	#NULL!	#NULL!	#NULL!	#NULL!	1	2	#NULL!	#NULL!	#NULL!	#NULL!		2	2	2	2
2018-08-20 17:40:51	198	2018-08-20	Good	#NULL!	#NULL!	#NULL!	#NULL!	#NULL!	#NULL!	#NULL!	#NULL!	#NULL!		0	#NULL!	#NULL!	#NULL!	#NULL!	#NULL!	#NULL!	#NULL!	#NULL!	#NULL!	#NULL!	#NULL!	#NULL!	#NULL!	#NULL!	#NULL!	#NULL!	#NULL!	#NULL!	#NULL!	#NULL!	#NULL!	#NULL!	#NULL!	#NULL!	1	2	#NULL!	#NULL!	#NULL!	#NULL!		2	2	2	2
2018-08-27 18:47:56	198	2018-08-27	Sore and numb under right arm.	#NULL!	#NULL!	#NULL!	#NULL!	#NULL!	#NULL!	#NULL!	#NULL!	#NULL!		0	#NULL!	#NULL!	#NULL!	#NULL!	#NULL!	#NULL!	#NULL!	#NULL!	#NULL!	#NULL!	#NULL!	#NULL!	#NULL!	#NULL!	#NULL!	#NULL!	#NULL!	#NULL!	#NULL!	#NULL!	#NULL!	#NULL!	#NULL!	#NULL!	1	4	#NULL!	#NULL!	#NULL!	#NULL!		2	2	2	3
2018-08-30 11:41:02	198	2018-08-30		#NULL!	#NULL!	#NULL!	#NULL!	#NULL!	#NULL!	#NULL!	#NULL!	#NULL!		#NULL!	#NULL!	#NULL!	#NULL!	#NULL!	#NULL!	#NULL!	#NULL!	#NULL!	#NULL!	#NULL!	#NULL!	#NULL!	#NULL!	#NULL!	#NULL!	#NULL!	#NULL!	#NULL!	#NULL!	#NULL!	#NULL!	#NULL!	#NULL!	#NULL!	#NULL!	#NULL!	#NULL!	#NULL!	#NULL!	#NULL!		#NULL!	#NULL!	#NULL!	#NULL!
2018-09-10 14:01:33	198	2018-09-10	Good	#NULL!	#NULL!	#NULL!	#NULL!	#NULL!	#NULL!	#NULL!	#NULL!	#NULL!		1	5	2	2	3	3	1	1	1	1	1	1	1	3	3	3	3	4	2	2	2	3	3	3	3	1	4	#NULL!	#NULL!	#NULL!	#NULL!		2	2	2	3
2018-10-09 04:30:47	198	2018-10-09	Good	1	#NULL!	#NULL!	#NULL!	#NULL!	#NULL!	#NULL!	#NULL!	#NULL!		0	#NULL!	#NULL!	#NULL!	#NULL!	#NULL!	#NULL!	#NULL!	#NULL!	#NULL!	#NULL!	#NULL!	#NULL!	#NULL!	#NULL!	#NULL!	#NULL!	#NULL!	#NULL!	#NULL!	#NULL!	#NULL!	#NULL!	#NULL!	#NULL!	1	2	#NULL!	#NULL!	#NULL!	#NULL!		2	2	2	2
2018-10-17 13:15:22	198	2018-10-17	Good	1	#NULL!	#NULL!	#NULL!	#NULL!	#NULL!	#NULL!	#NULL!	#NULL!		0	#NULL!	#NULL!	#NULL!	#NULL!	#NULL!	#NULL!	#NULL!	#NULL!	#NULL!	#NULL!	#NULL!	#NULL!	#NULL!	#NULL!	#NULL!	#NULL!	#NULL!	#NULL!	#NULL!	#NULL!	#NULL!	#NULL!	#NULL!	#NULL!	1	5	#NULL!	#NULL!	#NULL!	#NULL!		3	3	2	3
2018-10-23 18:32:28	198	2018-10-23	Good	1	#NULL!	#NULL!	#NULL!	#NULL!	#NULL!	#NULL!	#NULL!	#NULL!		0	#NULL!	#NULL!	#NULL!	#NULL!	#NULL!	#NULL!	#NULL!	#NULL!	#NULL!	#NULL!	#NULL!	#NULL!	#NULL!	#NULL!	#NULL!	#NULL!	#NULL!	#NULL!	#NULL!	#NULL!	#NULL!	#NULL!	#NULL!	#NULL!	1	5	#NULL!	#NULL!	#NULL!	#NULL!		2	2	2	2
2018-10-30 12:22:08	198	2018-10-01	good	1	#NULL!	#NULL!	#NULL!	#NULL!	#NULL!	#NULL!	#NULL!	#NULL!		0	#NULL!	#NULL!	#NULL!	#NULL!	#NULL!	#NULL!	#NULL!	#NULL!	#NULL!	#NULL!	#NULL!	#NULL!	#NULL!	#NULL!	#NULL!	#NULL!	#NULL!	#NULL!	#NULL!	#NULL!	#NULL!	#NULL!	#NULL!	#NULL!	1	2	#NULL!	#NULL!	#NULL!	#NULL!		3	3	2	3
2018-11-05 19:11:37	198	2018-11-05	Better	#NULL!	#NULL!	#NULL!	1	#NULL!	#NULL!	#NULL!	#NULL!	#NULL!		#NULL!	#NULL!	#NULL!	#NULL!	#NULL!	#NULL!	#NULL!	#NULL!	#NULL!	#NULL!	#NULL!	#NULL!	#NULL!	#NULL!	#NULL!	#NULL!	#NULL!	#NULL!	#NULL!	#NULL!	#NULL!	#NULL!	#NULL!	#NULL!	#NULL!	1	4	#NULL!	#NULL!	#NULL!	#NULL!		2	2	2	2
2018-08-01 09:56:17	199	2018-08-01	fantastic!	#NULL!	#NULL!	#NULL!	#NULL!	#NULL!	#NULL!	#NULL!	#NULL!	#NULL!		0	#NULL!	#NULL!	#NULL!	#NULL!	#NULL!	#NULL!	#NULL!	#NULL!	#NULL!	#NULL!	#NULL!	#NULL!	#NULL!	#NULL!	#NULL!	#NULL!	#NULL!	#NULL!	#NULL!	#NULL!	#NULL!	#NULL!	#NULL!	#NULL!	1	0	#NULL!	#NULL!	#NULL!	#NULL!		#NULL!	#NULL!	#NULL!	#NULL!
2018-08-07 12:17:14	199	2018-08-07	fantastic	#NULL!	#NULL!	#NULL!	#NULL!	#NULL!	#NULL!	#NULL!	#NULL!	#NULL!		0	#NULL!	#NULL!	#NULL!	#NULL!	#NULL!	#NULL!	#NULL!	#NULL!	#NULL!	#NULL!	#NULL!	#NULL!	#NULL!	#NULL!	#NULL!	#NULL!	#NULL!	#NULL!	#NULL!	#NULL!	#NULL!	#NULL!	#NULL!	#NULL!	1	0	#NULL!	#NULL!	#NULL!	#NULL!		#NULL!	#NULL!	#NULL!	#NULL!
2018-08-14 09:45:22	199	2018-08-14	fantastic	#NULL!	#NULL!	#NULL!	#NULL!	#NULL!	#NULL!	#NULL!	#NULL!	#NULL!		0	#NULL!	#NULL!	#NULL!	#NULL!	#NULL!	#NULL!	#NULL!	#NULL!	#NULL!	#NULL!	#NULL!	#NULL!	#NULL!	#NULL!	#NULL!	#NULL!	#NULL!	#NULL!	#NULL!	#NULL!	#NULL!	#NULL!	#NULL!	#NULL!	1	0	#NULL!	#NULL!	#NULL!	#NULL!		#NULL!	#NULL!	#NULL!	#NULL!
2018-08-21 09:45:25	199	2018-08-21	good	#NULL!	#NULL!	#NULL!	#NULL!	#NULL!	#NULL!	#NULL!	#NULL!	#NULL!		0	#NULL!	#NULL!	#NULL!	#NULL!	#NULL!	#NULL!	#NULL!	#NULL!	#NULL!	#NULL!	#NULL!	#NULL!	#NULL!	#NULL!	#NULL!	#NULL!	#NULL!	#NULL!	#NULL!	#NULL!	#NULL!	#NULL!	#NULL!	#NULL!	1	0	#NULL!	#NULL!	#NULL!	#NULL!		#NULL!	#NULL!	#NULL!	#NULL!
2018-08-28 11:59:57	199	2018-08-28	fantastic	#NULL!	#NULL!	#NULL!	#NULL!	#NULL!	#NULL!	#NULL!	#NULL!	#NULL!		0	#NULL!	#NULL!	#NULL!	#NULL!	#NULL!	#NULL!	#NULL!	#NULL!	#NULL!	#NULL!	#NULL!	#NULL!	#NULL!	#NULL!	#NULL!	#NULL!	#NULL!	#NULL!	#NULL!	#NULL!	#NULL!	#NULL!	#NULL!	#NULL!	1	0	#NULL!	#NULL!	#NULL!	#NULL!		#NULL!	#NULL!	#NULL!	#NULL!
2018-09-11 17:08:35	199	2018-09-11	Great!	#NULL!	#NULL!	#NULL!	#NULL!	#NULL!	#NULL!	#NULL!	#NULL!	#NULL!		0	#NULL!	#NULL!	#NULL!	#NULL!	#NULL!	#NULL!	#NULL!	#NULL!	#NULL!	#NULL!	#NULL!	#NULL!	#NULL!	#NULL!	#NULL!	#NULL!	#NULL!	#NULL!	#NULL!	#NULL!	#NULL!	#NULL!	#NULL!	#NULL!	1	0	#NULL!	#NULL!	#NULL!	#NULL!		#NULL!	#NULL!	#NULL!	#NULL!
2018-09-13 13:50:38	199	2018-09-13	great	#NULL!	#NULL!	#NULL!	#NULL!	#NULL!	#NULL!	#NULL!	#NULL!	#NULL!		0	#NULL!	#NULL!	#NULL!	#NULL!	#NULL!	#NULL!	#NULL!	#NULL!	#NULL!	#NULL!	#NULL!	#NULL!	#NULL!	#NULL!	#NULL!	#NULL!	#NULL!	#NULL!	#NULL!	#NULL!	#NULL!	#NULL!	#NULL!	#NULL!	1	0	#NULL!	#NULL!	#NULL!	#NULL!		#NULL!	#NULL!	#NULL!	#NULL!
2018-09-17 15:40:12	199	2018-09-17	great	1	#NULL!	#NULL!	#NULL!	#NULL!	#NULL!	#NULL!	#NULL!	#NULL!		0	#NULL!	#NULL!	#NULL!	#NULL!	#NULL!	#NULL!	#NULL!	#NULL!	#NULL!	#NULL!	#NULL!	#NULL!	#NULL!	#NULL!	#NULL!	#NULL!	#NULL!	#NULL!	#NULL!	#NULL!	#NULL!	#NULL!	#NULL!	#NULL!	1	0	#NULL!	#NULL!	#NULL!	#NULL!		#NULL!	#NULL!	#NULL!	#NULL!
2018-09-25 13:51:40	199	2018-09-25	Great!	1	#NULL!	#NULL!	#NULL!	#NULL!	#NULL!	#NULL!	#NULL!	#NULL!		0	#NULL!	#NULL!	#NULL!	#NULL!	#NULL!	#NULL!	#NULL!	#NULL!	#NULL!	#NULL!	#NULL!	#NULL!	#NULL!	#NULL!	#NULL!	#NULL!	#NULL!	#NULL!	#NULL!	#NULL!	#NULL!	#NULL!	#NULL!	#NULL!	1	0	#NULL!	#NULL!	#NULL!	#NULL!		#NULL!	#NULL!	#NULL!	#NULL!
2018-10-08 08:20:09	199	2018-10-08	wonderful	1	#NULL!	#NULL!	#NULL!	#NULL!	#NULL!	#NULL!	#NULL!	#NULL!		0	#NULL!	#NULL!	#NULL!	#NULL!	#NULL!	#NULL!	#NULL!	#NULL!	#NULL!	#NULL!	#NULL!	#NULL!	#NULL!	#NULL!	#NULL!	#NULL!	#NULL!	#NULL!	#NULL!	#NULL!	#NULL!	#NULL!	#NULL!	#NULL!	1	0	#NULL!	#NULL!	#NULL!	#NULL!		#NULL!	#NULL!	#NULL!	#NULL!
2018-10-15 17:10:20	199	2018-10-15	wonderful	1	#NULL!	#NULL!	#NULL!	#NULL!	#NULL!	#NULL!	#NULL!	#NULL!		0	#NULL!	#NULL!	#NULL!	#NULL!	#NULL!	#NULL!	#NULL!	#NULL!	#NULL!	#NULL!	#NULL!	#NULL!	#NULL!	#NULL!	#NULL!	#NULL!	#NULL!	#NULL!	#NULL!	#NULL!	#NULL!	#NULL!	#NULL!	#NULL!	1	0	#NULL!	#NULL!	#NULL!	#NULL!		#NULL!	#NULL!	#NULL!	#NULL!
2018-10-23 15:33:58	199	2018-10-23	Wonderful	1	#NULL!	#NULL!	#NULL!	#NULL!	#NULL!	#NULL!	#NULL!	#NULL!		0	#NULL!	#NULL!	#NULL!	#NULL!	#NULL!	#NULL!	#NULL!	#NULL!	#NULL!	#NULL!	#NULL!	#NULL!	#NULL!	#NULL!	#NULL!	#NULL!	#NULL!	#NULL!	#NULL!	#NULL!	#NULL!	#NULL!	#NULL!	#NULL!	1	0	#NULL!	#NULL!	#NULL!	#NULL!		#NULL!	#NULL!	#NULL!	#NULL!
2018-11-05 14:18:07	199	2018-11-05	Great!	1	#NULL!	#NULL!	#NULL!	#NULL!	#NULL!	#NULL!	#NULL!	#NULL!		0	#NULL!	#NULL!	#NULL!	#NULL!	#NULL!	#NULL!	#NULL!	#NULL!	#NULL!	#NULL!	#NULL!	#NULL!	#NULL!	#NULL!	#NULL!	#NULL!	#NULL!	#NULL!	#NULL!	#NULL!	#NULL!	#NULL!	#NULL!	#NULL!	1	0	#NULL!	#NULL!	#NULL!	#NULL!		#NULL!	#NULL!	#NULL!	#NULL!
2018-08-01 11:40:17	200	2018-08-01	good	#NULL!	#NULL!	#NULL!	#NULL!	#NULL!	#NULL!	#NULL!	#NULL!	#NULL!		0	#NULL!	#NULL!	#NULL!	#NULL!	#NULL!	#NULL!	#NULL!	#NULL!	#NULL!	#NULL!	#NULL!	#NULL!	#NULL!	#NULL!	#NULL!	#NULL!	#NULL!	#NULL!	#NULL!	#NULL!	#NULL!	#NULL!	#NULL!	#NULL!	1	1	#NULL!	#NULL!	#NULL!	#NULL!		#NULL!	#NULL!	#NULL!	#NULL!
2018-08-23 16:50:59	200	2018-08-23	ok, doing fine	#NULL!	#NULL!	#NULL!	#NULL!	#NULL!	#NULL!	#NULL!	#NULL!	#NULL!		1	2	2	2	1	3	2	2	3	1	1	3	2	2	1	2	2	4	3	1	1	2	2	3	2	1	0	#NULL!	#NULL!	#NULL!	#NULL!		#NULL!	#NULL!	#NULL!	#NULL!
2018-07-30 13:30:43	202	2018-07-30	pretty good	#NULL!	#NULL!	#NULL!	#NULL!	#NULL!	#NULL!	#NULL!	#NULL!	#NULL!		0	#NULL!	#NULL!	#NULL!	#NULL!	#NULL!	#NULL!	#NULL!	#NULL!	#NULL!	#NULL!	#NULL!	#NULL!	#NULL!	#NULL!	#NULL!	#NULL!	#NULL!	#NULL!	#NULL!	#NULL!	#NULL!	#NULL!	#NULL!	#NULL!	1	2	#NULL!	#NULL!	#NULL!	#NULL!		#NULL!	#NULL!	#NULL!	#NULL!
2018-08-06 15:30:41	202	2018-08-06	good	#NULL!	#NULL!	#NULL!	#NULL!	#NULL!	#NULL!	#NULL!	#NULL!	#NULL!		0	#NULL!	#NULL!	#NULL!	#NULL!	#NULL!	#NULL!	#NULL!	#NULL!	#NULL!	#NULL!	#NULL!	#NULL!	#NULL!	#NULL!	#NULL!	#NULL!	#NULL!	#NULL!	#NULL!	#NULL!	#NULL!	#NULL!	#NULL!	#NULL!	1	2	#NULL!	#NULL!	#NULL!	#NULL!		#NULL!	#NULL!	#NULL!	#NULL!
2018-08-13 11:58:31	202	2018-08-13	good. very good no problems	#NULL!	#NULL!	#NULL!	#NULL!	#NULL!	#NULL!	#NULL!	#NULL!	#NULL!		0	#NULL!	#NULL!	#NULL!	#NULL!	#NULL!	#NULL!	#NULL!	#NULL!	#NULL!	#NULL!	#NULL!	#NULL!	#NULL!	#NULL!	#NULL!	#NULL!	#NULL!	#NULL!	#NULL!	#NULL!	#NULL!	#NULL!	#NULL!	#NULL!	1	2	#NULL!	#NULL!	#NULL!	#NULL!		1	2	1	2
2018-08-21 09:57:16	202	2018-08-21	totally great	#NULL!	#NULL!	#NULL!	#NULL!	#NULL!	#NULL!	#NULL!	#NULL!	#NULL!		0	#NULL!	#NULL!	#NULL!	#NULL!	#NULL!	#NULL!	#NULL!	#NULL!	#NULL!	#NULL!	#NULL!	#NULL!	#NULL!	#NULL!	#NULL!	#NULL!	#NULL!	#NULL!	#NULL!	#NULL!	#NULL!	#NULL!	#NULL!	#NULL!	1	2	#NULL!	#NULL!	#NULL!	#NULL!		1	2	1	2
2018-08-27 11:48:08	202	2018-08-27	double ear infection	#NULL!	#NULL!	#NULL!	#NULL!	#NULL!	#NULL!	#NULL!	#NULL!	#NULL!		0	#NULL!	#NULL!	#NULL!	#NULL!	#NULL!	#NULL!	#NULL!	#NULL!	#NULL!	#NULL!	#NULL!	#NULL!	#NULL!	#NULL!	#NULL!	#NULL!	#NULL!	#NULL!	#NULL!	#NULL!	#NULL!	#NULL!	#NULL!	#NULL!	1	0	#NULL!	#NULL!	#NULL!	#NULL!		#NULL!	#NULL!	#NULL!	#NULL!
2018-10-11 13:49:43	202	2018-10-11	good	1	#NULL!	#NULL!	#NULL!	#NULL!	#NULL!	#NULL!	#NULL!	#NULL!		0	#NULL!	#NULL!	#NULL!	#NULL!	#NULL!	#NULL!	#NULL!	#NULL!	#NULL!	#NULL!	#NULL!	#NULL!	#NULL!	#NULL!	#NULL!	#NULL!	#NULL!	#NULL!	#NULL!	#NULL!	#NULL!	#NULL!	#NULL!	#NULL!	1	2	#NULL!	#NULL!	#NULL!	#NULL!		2	2	2	2
2018-10-15 14:32:19	202	2018-10-15	great	1	#NULL!	#NULL!	#NULL!	#NULL!	#NULL!	#NULL!	#NULL!	#NULL!		1	1	1	1	1	1	1	1	2	1	1	1	1	2	1	2	2	3	3	4	4	1	1	1	1	1	1	#NULL!	#NULL!	#NULL!	#NULL!		1	1	1	1
2018-11-12 13:44:46	202	2018-11-12	good	1	#NULL!	#NULL!	#NULL!	#NULL!	#NULL!	#NULL!	#NULL!	#NULL!		#NULL!	#NULL!	#NULL!	#NULL!	#NULL!	#NULL!	#NULL!	#NULL!	#NULL!	#NULL!	#NULL!	#NULL!	#NULL!	#NULL!	#NULL!	#NULL!	#NULL!	#NULL!	#NULL!	#NULL!	#NULL!	#NULL!	#NULL!	#NULL!	#NULL!	1	1	#NULL!	#NULL!	#NULL!	#NULL!		1	2	1	2
2018-12-12 09:10:30	202	2018-12-12	ok	1	#NULL!	#NULL!	#NULL!	#NULL!	#NULL!	#NULL!	#NULL!	#NULL!		#NULL!	#NULL!	#NULL!	#NULL!	#NULL!	#NULL!	#NULL!	#NULL!	#NULL!	#NULL!	#NULL!	#NULL!	#NULL!	#NULL!	#NULL!	#NULL!	#NULL!	#NULL!	#NULL!	#NULL!	#NULL!	#NULL!	#NULL!	#NULL!	#NULL!	1	1	#NULL!	#NULL!	#NULL!	#NULL!		1	1	1	1
2019-01-16 09:23:28	202	2019-01-16	ok	1	#NULL!	#NULL!	#NULL!	#NULL!	#NULL!	#NULL!	#NULL!	#NULL!		#NULL!	#NULL!	#NULL!	#NULL!	#NULL!	#NULL!	#NULL!	#NULL!	#NULL!	#NULL!	#NULL!	#NULL!	#NULL!	#NULL!	#NULL!	#NULL!	#NULL!	#NULL!	#NULL!	#NULL!	#NULL!	#NULL!	#NULL!	#NULL!	#NULL!	1	0	#NULL!	#NULL!	#NULL!	#NULL!		#NULL!	#NULL!	#NULL!	#NULL!
2019-01-30 10:20:29	202	2019-01-30	good	#NULL!	#NULL!	#NULL!	1	#NULL!	#NULL!	#NULL!	#NULL!	#NULL!		#NULL!	#NULL!	#NULL!	#NULL!	#NULL!	#NULL!	#NULL!	#NULL!	#NULL!	#NULL!	#NULL!	#NULL!	#NULL!	#NULL!	#NULL!	#NULL!	#NULL!	#NULL!	#NULL!	#NULL!	#NULL!	#NULL!	#NULL!	#NULL!	#NULL!	1	0	#NULL!	#NULL!	#NULL!	#NULL!		#NULL!	#NULL!	#NULL!	#NULL!
2018-08-14 11:52:26	204	2018-08-14	good	1	#NULL!	#NULL!	#NULL!	#NULL!	#NULL!	#NULL!	#NULL!	#NULL!		0	#NULL!	#NULL!	#NULL!	#NULL!	#NULL!	#NULL!	#NULL!	#NULL!	#NULL!	#NULL!	#NULL!	#NULL!	#NULL!	#NULL!	#NULL!	#NULL!	#NULL!	#NULL!	#NULL!	#NULL!	#NULL!	#NULL!	#NULL!	#NULL!	2	7	#NULL!	#NULL!	#NULL!	#NULL!		3	3	3	3
2018-08-22 17:12:19	204	2018-08-22	Pretty good	1	#NULL!	#NULL!	#NULL!	#NULL!	#NULL!	#NULL!	#NULL!	#NULL!		0	#NULL!	#NULL!	#NULL!	#NULL!	#NULL!	#NULL!	#NULL!	#NULL!	#NULL!	#NULL!	#NULL!	#NULL!	#NULL!	#NULL!	#NULL!	#NULL!	#NULL!	#NULL!	#NULL!	#NULL!	#NULL!	#NULL!	#NULL!	#NULL!	1	6	#NULL!	#NULL!	#NULL!	#NULL!		3	3	3	3
2018-08-29 11:08:37	204	2018-08-29	Ok	1	#NULL!	#NULL!	#NULL!	#NULL!	#NULL!	#NULL!	#NULL!	#NULL!		0	#NULL!	#NULL!	#NULL!	#NULL!	#NULL!	#NULL!	#NULL!	#NULL!	#NULL!	#NULL!	#NULL!	#NULL!	#NULL!	#NULL!	#NULL!	#NULL!	#NULL!	#NULL!	#NULL!	#NULL!	#NULL!	#NULL!	#NULL!	#NULL!	2	7	#NULL!	#NULL!	#NULL!	#NULL!		2	2	2	2
2018-09-13 11:27:00	204	2018-09-13	OK	#NULL!	#NULL!	#NULL!	1	#NULL!	#NULL!	#NULL!	#NULL!	#NULL!		0	#NULL!	#NULL!	#NULL!	#NULL!	#NULL!	#NULL!	#NULL!	#NULL!	#NULL!	#NULL!	#NULL!	#NULL!	#NULL!	#NULL!	#NULL!	#NULL!	#NULL!	#NULL!	#NULL!	#NULL!	#NULL!	#NULL!	#NULL!	#NULL!	2	7	#NULL!	#NULL!	#NULL!	#NULL!		3	3	3	3
2018-09-17 15:45:36	204	2018-09-17	OK	#NULL!	#NULL!	#NULL!	1	#NULL!	#NULL!	#NULL!	#NULL!	#NULL!		0	#NULL!	#NULL!	#NULL!	#NULL!	#NULL!	#NULL!	#NULL!	#NULL!	#NULL!	#NULL!	#NULL!	#NULL!	#NULL!	#NULL!	#NULL!	#NULL!	#NULL!	#NULL!	#NULL!	#NULL!	#NULL!	#NULL!	#NULL!	#NULL!	2	7	#NULL!	#NULL!	#NULL!	#NULL!		3	3	3	3
2018-09-27 07:51:20	204	2018-09-27	Fine	#NULL!	#NULL!	#NULL!	1	#NULL!	#NULL!	#NULL!	#NULL!	#NULL!		1	2	2	2	2	2	1	1	1	1	1	1	1	2	2	2	2	2	2	4	3	2	2	2	2	1	3	#NULL!	#NULL!	#NULL!	#NULL!		2	2	2	2
2018-11-20 14:16:30	204	2018-11-20	Tired	#NULL!	#NULL!	#NULL!	1	#NULL!	#NULL!	#NULL!	#NULL!	#NULL!		#NULL!	#NULL!	#NULL!	#NULL!	#NULL!	#NULL!	#NULL!	#NULL!	#NULL!	#NULL!	#NULL!	#NULL!	#NULL!	#NULL!	#NULL!	#NULL!	#NULL!	#NULL!	#NULL!	#NULL!	#NULL!	#NULL!	#NULL!	#NULL!	#NULL!	1	6	#NULL!	#NULL!	#NULL!	#NULL!		2	2	2	2
2018-12-14 13:27:06	204	2018-12-14	Fair	#NULL!	#NULL!	#NULL!	1	#NULL!	#NULL!	#NULL!	#NULL!	#NULL!		#NULL!	#NULL!	#NULL!	#NULL!	#NULL!	#NULL!	#NULL!	#NULL!	#NULL!	#NULL!	#NULL!	#NULL!	#NULL!	#NULL!	#NULL!	#NULL!	#NULL!	#NULL!	#NULL!	#NULL!	#NULL!	#NULL!	#NULL!	#NULL!	#NULL!	1	4	#NULL!	#NULL!	#NULL!	#NULL!		2	3	2	3
2018-12-19 16:16:26	204	2018-12-19	ok	#NULL!	#NULL!	#NULL!	1	#NULL!	#NULL!	#NULL!	#NULL!	#NULL!		#NULL!	#NULL!	#NULL!	#NULL!	#NULL!	#NULL!	#NULL!	#NULL!	#NULL!	#NULL!	#NULL!	#NULL!	#NULL!	#NULL!	#NULL!	#NULL!	#NULL!	#NULL!	#NULL!	#NULL!	#NULL!	#NULL!	#NULL!	#NULL!	#NULL!	2	7	#NULL!	#NULL!	#NULL!	#NULL!		3	3	3	3
2018-09-10 16:19:15	205	2018-09-10	good	#NULL!	#NULL!	#NULL!	#NULL!	#NULL!	#NULL!	#NULL!	#NULL!	#NULL!		0	#NULL!	#NULL!	#NULL!	#NULL!	#NULL!	#NULL!	#NULL!	#NULL!	#NULL!	#NULL!	#NULL!	#NULL!	#NULL!	#NULL!	#NULL!	#NULL!	#NULL!	#NULL!	#NULL!	#NULL!	#NULL!	#NULL!	#NULL!	#NULL!	1	1	#NULL!	#NULL!	#NULL!	#NULL!		1	1	1	1
2018-09-13 15:59:06	205	2018-09-13	Good	#NULL!	#NULL!	#NULL!	#NULL!	#NULL!	#NULL!	#NULL!	#NULL!	#NULL!		0	#NULL!	#NULL!	#NULL!	#NULL!	#NULL!	#NULL!	#NULL!	#NULL!	#NULL!	#NULL!	#NULL!	#NULL!	#NULL!	#NULL!	#NULL!	#NULL!	#NULL!	#NULL!	#NULL!	#NULL!	#NULL!	#NULL!	#NULL!	#NULL!	1	1	#NULL!	#NULL!	#NULL!	#NULL!		1	1	1	1
2018-10-15 19:36:47	205	2018-10-15	Ok	1	#NULL!	#NULL!	#NULL!	#NULL!	#NULL!	#NULL!	#NULL!	#NULL!		0	#NULL!	#NULL!	#NULL!	#NULL!	#NULL!	#NULL!	#NULL!	#NULL!	#NULL!	#NULL!	#NULL!	#NULL!	#NULL!	#NULL!	#NULL!	#NULL!	#NULL!	#NULL!	#NULL!	#NULL!	#NULL!	#NULL!	#NULL!	#NULL!	1	2	#NULL!	#NULL!	#NULL!	#NULL!		2	2	1	2
2018-10-23 16:04:20	205	2018-10-23	Good	#NULL!	#NULL!	1	#NULL!	#NULL!	#NULL!	#NULL!	#NULL!	#NULL!		0	#NULL!	#NULL!	#NULL!	#NULL!	#NULL!	#NULL!	#NULL!	#NULL!	#NULL!	#NULL!	#NULL!	#NULL!	#NULL!	#NULL!	#NULL!	#NULL!	#NULL!	#NULL!	#NULL!	#NULL!	#NULL!	#NULL!	#NULL!	#NULL!	1	1	#NULL!	#NULL!	#NULL!	#NULL!		2	2	1	2
2018-11-05 08:53:31	205	#NULL!	Good	1	#NULL!	#NULL!	#NULL!	#NULL!	#NULL!	#NULL!	#NULL!	#NULL!		0	#NULL!	#NULL!	#NULL!	#NULL!	#NULL!	#NULL!	#NULL!	#NULL!	#NULL!	#NULL!	#NULL!	#NULL!	#NULL!	#NULL!	#NULL!	#NULL!	#NULL!	#NULL!	#NULL!	#NULL!	#NULL!	#NULL!	#NULL!	#NULL!	1	1	#NULL!	#NULL!	#NULL!	#NULL!		2	2	1	2
2018-11-15 11:53:03	205	2018-11-15	Fine	#NULL!	#NULL!	1	#NULL!	#NULL!	#NULL!	#NULL!	#NULL!	#NULL!		1	1	1	1	1	2	1	3	2	1	1	1	1	2	1	3	3	3	2	2	1	1	1	1	1	1	2	#NULL!	#NULL!	#NULL!	#NULL!		2	1	1	1
2018-11-19 22:06:21	205	2018-11-19	Good	#NULL!	#NULL!	1	#NULL!	#NULL!	#NULL!	#NULL!	#NULL!	#NULL!		0	#NULL!	#NULL!	#NULL!	#NULL!	#NULL!	#NULL!	#NULL!	#NULL!	#NULL!	#NULL!	#NULL!	#NULL!	#NULL!	#NULL!	#NULL!	#NULL!	#NULL!	#NULL!	#NULL!	#NULL!	#NULL!	#NULL!	#NULL!	#NULL!	1	2	#NULL!	#NULL!	#NULL!	#NULL!		2	2	1	1
2018-11-30 08:33:49	205	#NULL!	Good	#NULL!	#NULL!	1	#NULL!	#NULL!	#NULL!	#NULL!	#NULL!	#NULL!		1	3	2	2	2	2	1	3	3	1	1	1	1	3	1	3	3	3	2	2	1	1	1	2	1	1	6	#NULL!	#NULL!	#NULL!	#NULL!		3	3	1	3
2018-12-11 21:24:04	205	2018-12-11	Good	#NULL!	#NULL!	1	#NULL!	#NULL!	#NULL!	#NULL!	#NULL!	#NULL!		0	#NULL!	#NULL!	#NULL!	#NULL!	#NULL!	#NULL!	#NULL!	#NULL!	#NULL!	#NULL!	#NULL!	#NULL!	#NULL!	#NULL!	#NULL!	#NULL!	#NULL!	#NULL!	#NULL!	#NULL!	#NULL!	#NULL!	#NULL!	#NULL!	1	2	#NULL!	#NULL!	#NULL!	#NULL!		1	1	1	1
2018-12-17 13:28:47	205	2018-12-17	Good	#NULL!	#NULL!	1	#NULL!	#NULL!	#NULL!	#NULL!	#NULL!	#NULL!		0	#NULL!	#NULL!	#NULL!	#NULL!	#NULL!	#NULL!	#NULL!	#NULL!	#NULL!	#NULL!	#NULL!	#NULL!	#NULL!	#NULL!	#NULL!	#NULL!	#NULL!	#NULL!	#NULL!	#NULL!	#NULL!	#NULL!	#NULL!	#NULL!	1	1	#NULL!	#NULL!	#NULL!	#NULL!		1	1	1	1
2019-01-07 21:21:57	205	2019-01-07	Good	#NULL!	#NULL!	1	#NULL!	#NULL!	#NULL!	#NULL!	#NULL!	#NULL!		0	#NULL!	#NULL!	#NULL!	#NULL!	#NULL!	#NULL!	#NULL!	#NULL!	#NULL!	#NULL!	#NULL!	#NULL!	#NULL!	#NULL!	#NULL!	#NULL!	#NULL!	#NULL!	#NULL!	#NULL!	#NULL!	#NULL!	#NULL!	#NULL!	1	3	#NULL!	#NULL!	#NULL!	#NULL!		1	1	1	2
2019-01-14 18:22:53	205	2019-01-14	Good	#NULL!	#NULL!	1	#NULL!	#NULL!	#NULL!	#NULL!	#NULL!	#NULL!		0	#NULL!	#NULL!	#NULL!	#NULL!	#NULL!	#NULL!	#NULL!	#NULL!	#NULL!	#NULL!	#NULL!	#NULL!	#NULL!	#NULL!	#NULL!	#NULL!	#NULL!	#NULL!	#NULL!	#NULL!	#NULL!	#NULL!	#NULL!	#NULL!	1	2	#NULL!	#NULL!	#NULL!	#NULL!		2	2	1	1
2019-01-23 15:46:44	205	2019-01-23	Good	#NULL!	#NULL!	1	#NULL!	#NULL!	#NULL!	#NULL!	#NULL!	#NULL!		0	#NULL!	#NULL!	#NULL!	#NULL!	#NULL!	#NULL!	#NULL!	#NULL!	#NULL!	#NULL!	#NULL!	#NULL!	#NULL!	#NULL!	#NULL!	#NULL!	#NULL!	#NULL!	#NULL!	#NULL!	#NULL!	#NULL!	#NULL!	#NULL!	1	1	#NULL!	#NULL!	#NULL!	#NULL!		1	1	1	1
2019-01-30 20:00:08	205	2019-01-30	Good	1	#NULL!	#NULL!	#NULL!	#NULL!	#NULL!	#NULL!	#NULL!	#NULL!		#NULL!	#NULL!	#NULL!	#NULL!	#NULL!	#NULL!	#NULL!	#NULL!	#NULL!	#NULL!	#NULL!	#NULL!	#NULL!	#NULL!	#NULL!	#NULL!	#NULL!	#NULL!	#NULL!	#NULL!	#NULL!	#NULL!	#NULL!	#NULL!	#NULL!	1	1	#NULL!	#NULL!	#NULL!	#NULL!		1	1	1	1
2019-02-11 21:27:57	205	2019-02-11	Good	1	#NULL!	#NULL!	#NULL!	#NULL!	#NULL!	#NULL!	#NULL!	#NULL!		#NULL!	#NULL!	#NULL!	#NULL!	#NULL!	#NULL!	#NULL!	#NULL!	#NULL!	#NULL!	#NULL!	#NULL!	#NULL!	#NULL!	#NULL!	#NULL!	#NULL!	#NULL!	#NULL!	#NULL!	#NULL!	#NULL!	#NULL!	#NULL!	#NULL!	1	1	#NULL!	#NULL!	#NULL!	#NULL!		1	1	1	1
2019-02-19 20:19:04	205	#NULL!	Good	1	#NULL!	#NULL!	#NULL!	#NULL!	#NULL!	#NULL!	#NULL!	#NULL!		#NULL!	#NULL!	#NULL!	#NULL!	#NULL!	#NULL!	#NULL!	#NULL!	#NULL!	#NULL!	#NULL!	#NULL!	#NULL!	#NULL!	#NULL!	#NULL!	#NULL!	#NULL!	#NULL!	#NULL!	#NULL!	#NULL!	#NULL!	#NULL!	#NULL!	1	1	#NULL!	#NULL!	#NULL!	#NULL!		1	1	1	1
2019-02-26 14:26:08	205	2019-02-26	Good	1	#NULL!	#NULL!	#NULL!	#NULL!	#NULL!	#NULL!	#NULL!	#NULL!		0	#NULL!	#NULL!	#NULL!	#NULL!	#NULL!	#NULL!	#NULL!	#NULL!	#NULL!	#NULL!	#NULL!	#NULL!	#NULL!	#NULL!	#NULL!	#NULL!	#NULL!	#NULL!	#NULL!	#NULL!	#NULL!	#NULL!	#NULL!	#NULL!	1	3	#NULL!	#NULL!	#NULL!	#NULL!		2	3	2	3
2018-08-01 09:55:41	207	2018-08-01	good	#NULL!	#NULL!	#NULL!	#NULL!	#NULL!	#NULL!	#NULL!	#NULL!	#NULL!		0	#NULL!	#NULL!	#NULL!	#NULL!	#NULL!	#NULL!	#NULL!	#NULL!	#NULL!	#NULL!	#NULL!	#NULL!	#NULL!	#NULL!	#NULL!	#NULL!	#NULL!	#NULL!	#NULL!	#NULL!	#NULL!	#NULL!	#NULL!	#NULL!	1	0	#NULL!	#NULL!	#NULL!	#NULL!		#NULL!	#NULL!	#NULL!	#NULL!
2018-08-08 09:51:17	207	2018-08-08	good, a little anxious	#NULL!	#NULL!	#NULL!	#NULL!	#NULL!	#NULL!	#NULL!	#NULL!	#NULL!		0	#NULL!	#NULL!	#NULL!	#NULL!	#NULL!	#NULL!	#NULL!	#NULL!	#NULL!	#NULL!	#NULL!	#NULL!	#NULL!	#NULL!	#NULL!	#NULL!	#NULL!	#NULL!	#NULL!	#NULL!	#NULL!	#NULL!	#NULL!	#NULL!	1	0	#NULL!	#NULL!	#NULL!	#NULL!		#NULL!	#NULL!	#NULL!	#NULL!
2018-08-14 11:21:58	207	2018-08-14	fine	#NULL!	#NULL!	#NULL!	#NULL!	#NULL!	#NULL!	#NULL!	#NULL!	#NULL!		1	5	1	1	1	2	1	1	2	1	1	1	1	3	2	2	2	5	5	1	1	3	2	3	3	1	0	#NULL!	#NULL!	#NULL!	#NULL!		#NULL!	#NULL!	#NULL!	#NULL!
2018-08-21 12:43:23	207	2018-08-21	good	#NULL!	#NULL!	#NULL!	#NULL!	#NULL!	#NULL!	#NULL!	#NULL!	#NULL!		0	#NULL!	#NULL!	#NULL!	#NULL!	#NULL!	#NULL!	#NULL!	#NULL!	#NULL!	#NULL!	#NULL!	#NULL!	#NULL!	#NULL!	#NULL!	#NULL!	#NULL!	#NULL!	#NULL!	#NULL!	#NULL!	#NULL!	#NULL!	#NULL!	1	0	#NULL!	#NULL!	#NULL!	#NULL!		#NULL!	#NULL!	#NULL!	#NULL!
2018-08-29 10:38:23	207	2018-08-29	"i've been feeling good"	#NULL!	#NULL!	#NULL!	#NULL!	#NULL!	#NULL!	#NULL!	#NULL!	#NULL!		0	#NULL!	#NULL!	#NULL!	#NULL!	#NULL!	#NULL!	#NULL!	#NULL!	#NULL!	#NULL!	#NULL!	#NULL!	#NULL!	#NULL!	#NULL!	#NULL!	#NULL!	#NULL!	#NULL!	#NULL!	#NULL!	#NULL!	#NULL!	#NULL!	1	0	#NULL!	#NULL!	#NULL!	#NULL!		#NULL!	#NULL!	#NULL!	#NULL!
2018-09-11 10:01:49	207	2018-09-11	well good	#NULL!	#NULL!	#NULL!	#NULL!	#NULL!	#NULL!	#NULL!	#NULL!	#NULL!		0	#NULL!	#NULL!	#NULL!	#NULL!	#NULL!	#NULL!	#NULL!	#NULL!	#NULL!	#NULL!	#NULL!	#NULL!	#NULL!	#NULL!	#NULL!	#NULL!	#NULL!	#NULL!	#NULL!	#NULL!	#NULL!	#NULL!	#NULL!	#NULL!	1	0	#NULL!	#NULL!	#NULL!	#NULL!		#NULL!	#NULL!	#NULL!	#NULL!
2018-10-09 10:27:34	207	2018-10-09	JUST A COLD OTHERWISE FINE.	1	#NULL!	#NULL!	#NULL!	#NULL!	#NULL!	#NULL!	#NULL!	#NULL!		1	4	2	2	5	1	1	1	2	1	1	1	1	3	4	3	3	5	5	2	1	2	2	3	2	1	0	#NULL!	#NULL!	#NULL!	#NULL!		#NULL!	#NULL!	#NULL!	#NULL!
2018-07-30 13:42:30	208	2018-07-30	good, got the tube removed. getting better.	#NULL!	#NULL!	#NULL!	#NULL!	#NULL!	#NULL!	#NULL!	#NULL!	#NULL!		0	#NULL!	#NULL!	#NULL!	#NULL!	#NULL!	#NULL!	#NULL!	#NULL!	#NULL!	#NULL!	#NULL!	#NULL!	#NULL!	#NULL!	#NULL!	#NULL!	#NULL!	#NULL!	#NULL!	#NULL!	#NULL!	#NULL!	#NULL!	#NULL!	1	3	#NULL!	#NULL!	#NULL!	#NULL!		#NULL!	#NULL!	#NULL!	#NULL!
2018-08-06 15:47:38	208	2018-08-06	very well	#NULL!	#NULL!	#NULL!	#NULL!	#NULL!	#NULL!	#NULL!	#NULL!	#NULL!		0	#NULL!	#NULL!	#NULL!	#NULL!	#NULL!	#NULL!	#NULL!	#NULL!	#NULL!	#NULL!	#NULL!	#NULL!	#NULL!	#NULL!	#NULL!	#NULL!	#NULL!	#NULL!	#NULL!	#NULL!	#NULL!	#NULL!	#NULL!	#NULL!	1	2	#NULL!	#NULL!	#NULL!	#NULL!		#NULL!	#NULL!	#NULL!	#NULL!
2018-08-14 10:56:44	208	2018-08-14	okay	#NULL!	#NULL!	#NULL!	#NULL!	#NULL!	#NULL!	#NULL!	#NULL!	#NULL!		1	5	1	2	2	2	2	2	2	1	1	2	1	2	1	1	2	3	4	2	1	2	3	4	2	1	2	#NULL!	#NULL!	#NULL!	#NULL!		1	1	1	4
2018-08-20 10:45:30	208	2018-08-20	Very well	#NULL!	#NULL!	#NULL!	#NULL!	#NULL!	#NULL!	#NULL!	#NULL!	#NULL!		0	#NULL!	#NULL!	#NULL!	#NULL!	#NULL!	#NULL!	#NULL!	#NULL!	#NULL!	#NULL!	#NULL!	#NULL!	#NULL!	#NULL!	#NULL!	#NULL!	#NULL!	#NULL!	#NULL!	#NULL!	#NULL!	#NULL!	#NULL!	#NULL!	1	3	#NULL!	#NULL!	#NULL!	#NULL!		1	1	1	1
2018-09-19 10:39:36	208	2018-09-19	Pretty good, have had a lung biopsy and three teeth removed	1	#NULL!	#NULL!	#NULL!	#NULL!	#NULL!	#NULL!	#NULL!	#NULL!		1	3	1	1	1	2	2	1	2	1	1	1	1	2	2	2	3	3	3	2	1	2	2	2	1	1	4	#NULL!	#NULL!	#NULL!	#NULL!		3	3	3	3
2018-09-25 13:23:19	208	2018-09-25	pretty good. had 6 teeth taken.	#NULL!	#NULL!	#NULL!	1	#NULL!	#NULL!	#NULL!	#NULL!	#NULL!		1	2	1	1	1	2	1	1	2	1	2	1	1	2	2	2	2	4	4	2	1	2	1	2	2	1	4	#NULL!	#NULL!	#NULL!	#NULL!		2	2	2	2
2019-01-14 14:43:30	208	2019-01-14	better	#NULL!	#NULL!	1	1	#NULL!	#NULL!	#NULL!	#NULL!	#NULL!		0	#NULL!	#NULL!	#NULL!	#NULL!	#NULL!	#NULL!	#NULL!	#NULL!	#NULL!	#NULL!	#NULL!	#NULL!	#NULL!	#NULL!	#NULL!	#NULL!	#NULL!	#NULL!	#NULL!	#NULL!	#NULL!	#NULL!	#NULL!	#NULL!	1	3	#NULL!	#NULL!	#NULL!	#NULL!		1	1	1	1
2019-01-25 14:02:06	208	2019-01-25	overall well	#NULL!	#NULL!	1	1	#NULL!	#NULL!	#NULL!	#NULL!	#NULL!		0	#NULL!	#NULL!	#NULL!	#NULL!	#NULL!	#NULL!	#NULL!	#NULL!	#NULL!	#NULL!	#NULL!	#NULL!	#NULL!	#NULL!	#NULL!	#NULL!	#NULL!	#NULL!	#NULL!	#NULL!	#NULL!	#NULL!	#NULL!	#NULL!	1	2	#NULL!	#NULL!	#NULL!	#NULL!		1	1	1	1
2019-01-29 10:57:37	208	2019-01-29	"teeth bothering me"	#NULL!	#NULL!	1	1	#NULL!	#NULL!	#NULL!	#NULL!	#NULL!		0	#NULL!	#NULL!	#NULL!	#NULL!	#NULL!	#NULL!	#NULL!	#NULL!	#NULL!	#NULL!	#NULL!	#NULL!	#NULL!	#NULL!	#NULL!	#NULL!	#NULL!	#NULL!	#NULL!	#NULL!	#NULL!	#NULL!	#NULL!	#NULL!	1	5	#NULL!	#NULL!	#NULL!	#NULL!		1	1	1	1
2019-04-18 12:04:47	208	2019-04-18	pretty good	#NULL!	#NULL!	#NULL!	#NULL!	#NULL!	#NULL!	#NULL!	#NULL!	1	ibrance	0	#NULL!	#NULL!	#NULL!	#NULL!	#NULL!	#NULL!	#NULL!	#NULL!	#NULL!	#NULL!	#NULL!	#NULL!	#NULL!	#NULL!	#NULL!	#NULL!	#NULL!	#NULL!	#NULL!	#NULL!	#NULL!	#NULL!	#NULL!	#NULL!	1	5	#NULL!	#NULL!	#NULL!	#NULL!		3	2	2	2
2019-05-21 12:06:26	208	2019-05-21	doing ok	#NULL!	#NULL!	#NULL!	#NULL!	#NULL!	#NULL!	#NULL!	1	#NULL!		0	#NULL!	#NULL!	#NULL!	#NULL!	#NULL!	#NULL!	#NULL!	#NULL!	#NULL!	#NULL!	#NULL!	#NULL!	#NULL!	#NULL!	#NULL!	#NULL!	#NULL!	#NULL!	#NULL!	#NULL!	#NULL!	#NULL!	#NULL!	#NULL!	1	0	#NULL!	#NULL!	#NULL!	#NULL!		#NULL!	#NULL!	#NULL!	#NULL!
2019-06-26 15:33:48	208	2019-06-26	Doing OK--a couple of blooms of athlete's foot I'm treating--otherwise OK	#NULL!	#NULL!	#NULL!	#NULL!	#NULL!	#NULL!	#NULL!	1	#NULL!		0	#NULL!	#NULL!	#NULL!	#NULL!	#NULL!	#NULL!	#NULL!	#NULL!	#NULL!	#NULL!	#NULL!	#NULL!	#NULL!	#NULL!	#NULL!	#NULL!	#NULL!	#NULL!	#NULL!	#NULL!	#NULL!	#NULL!	#NULL!	#NULL!	1	3	#NULL!	#NULL!	#NULL!	#NULL!		1	1	1	1
2018-08-01 10:16:14	209	2018-08-01	PRETTY GOOD. DRAINS TAKEN OUT	#NULL!	#NULL!	#NULL!	#NULL!	#NULL!	#NULL!	#NULL!	#NULL!	#NULL!		0	#NULL!	#NULL!	#NULL!	#NULL!	#NULL!	#NULL!	#NULL!	#NULL!	#NULL!	#NULL!	#NULL!	#NULL!	#NULL!	#NULL!	#NULL!	#NULL!	#NULL!	#NULL!	#NULL!	#NULL!	#NULL!	#NULL!	#NULL!	#NULL!	1	3	#NULL!	#NULL!	#NULL!	#NULL!		#NULL!	#NULL!	#NULL!	#NULL!
2018-08-07 10:40:37	209	2018-08-07	Good	#NULL!	#NULL!	#NULL!	#NULL!	#NULL!	#NULL!	#NULL!	#NULL!	#NULL!		0	#NULL!	#NULL!	#NULL!	#NULL!	#NULL!	#NULL!	#NULL!	#NULL!	#NULL!	#NULL!	#NULL!	#NULL!	#NULL!	#NULL!	#NULL!	#NULL!	#NULL!	#NULL!	#NULL!	#NULL!	#NULL!	#NULL!	#NULL!	#NULL!	1	2	#NULL!	#NULL!	#NULL!	#NULL!		3	3	2	3
2018-08-13 21:20:25	209	2018-08-13	Ok	#NULL!	#NULL!	#NULL!	#NULL!	#NULL!	#NULL!	#NULL!	#NULL!	#NULL!		0	#NULL!	#NULL!	#NULL!	#NULL!	#NULL!	#NULL!	#NULL!	#NULL!	#NULL!	#NULL!	#NULL!	#NULL!	#NULL!	#NULL!	#NULL!	#NULL!	#NULL!	#NULL!	#NULL!	#NULL!	#NULL!	#NULL!	#NULL!	#NULL!	1	2	#NULL!	#NULL!	#NULL!	#NULL!		2	2	2	2
2018-08-20 21:13:05	209	2018-08-20	Tired but otherwise good	#NULL!	#NULL!	#NULL!	#NULL!	#NULL!	#NULL!	#NULL!	#NULL!	#NULL!		0	#NULL!	#NULL!	#NULL!	#NULL!	#NULL!	#NULL!	#NULL!	#NULL!	#NULL!	#NULL!	#NULL!	#NULL!	#NULL!	#NULL!	#NULL!	#NULL!	#NULL!	#NULL!	#NULL!	#NULL!	#NULL!	#NULL!	#NULL!	#NULL!	1	0	#NULL!	#NULL!	#NULL!	#NULL!		#NULL!	#NULL!	#NULL!	#NULL!
2018-08-23 11:46:02	209	2018-08-23	Tired but otherwise ok	#NULL!	#NULL!	#NULL!	#NULL!	#NULL!	#NULL!	#NULL!	#NULL!	#NULL!		0	#NULL!	#NULL!	#NULL!	#NULL!	#NULL!	#NULL!	#NULL!	#NULL!	#NULL!	#NULL!	#NULL!	#NULL!	#NULL!	#NULL!	#NULL!	#NULL!	#NULL!	#NULL!	#NULL!	#NULL!	#NULL!	#NULL!	#NULL!	#NULL!	1	0	#NULL!	#NULL!	#NULL!	#NULL!		#NULL!	#NULL!	#NULL!	#NULL!
2018-08-27 12:30:28	209	2018-08-27	Getting stronger everyday	#NULL!	#NULL!	#NULL!	#NULL!	#NULL!	#NULL!	#NULL!	#NULL!	#NULL!		0	#NULL!	#NULL!	#NULL!	#NULL!	#NULL!	#NULL!	#NULL!	#NULL!	#NULL!	#NULL!	#NULL!	#NULL!	#NULL!	#NULL!	#NULL!	#NULL!	#NULL!	#NULL!	#NULL!	#NULL!	#NULL!	#NULL!	#NULL!	#NULL!	1	0	#NULL!	#NULL!	#NULL!	#NULL!		#NULL!	#NULL!	#NULL!	#NULL!
2018-09-10 20:44:28	209	2018-09-10	Good	#NULL!	#NULL!	1	#NULL!	#NULL!	#NULL!	#NULL!	#NULL!	#NULL!		0	#NULL!	#NULL!	#NULL!	#NULL!	#NULL!	#NULL!	#NULL!	#NULL!	#NULL!	#NULL!	#NULL!	#NULL!	#NULL!	#NULL!	#NULL!	#NULL!	#NULL!	#NULL!	#NULL!	#NULL!	#NULL!	#NULL!	#NULL!	#NULL!	1	0	#NULL!	#NULL!	#NULL!	#NULL!		#NULL!	#NULL!	#NULL!	#NULL!
2018-09-20 13:20:02	209	2018-09-20	Good	#NULL!	#NULL!	1	#NULL!	#NULL!	#NULL!	#NULL!	#NULL!	#NULL!		0	#NULL!	#NULL!	#NULL!	#NULL!	#NULL!	#NULL!	#NULL!	#NULL!	#NULL!	#NULL!	#NULL!	#NULL!	#NULL!	#NULL!	#NULL!	#NULL!	#NULL!	#NULL!	#NULL!	#NULL!	#NULL!	#NULL!	#NULL!	#NULL!	1	1	#NULL!	#NULL!	#NULL!	#NULL!		2	2	2	2
2018-09-25 13:44:54	209	2018-09-25	Tired but good	#NULL!	#NULL!	1	#NULL!	#NULL!	#NULL!	#NULL!	#NULL!	#NULL!		0	#NULL!	#NULL!	#NULL!	#NULL!	#NULL!	#NULL!	#NULL!	#NULL!	#NULL!	#NULL!	#NULL!	#NULL!	#NULL!	#NULL!	#NULL!	#NULL!	#NULL!	#NULL!	#NULL!	#NULL!	#NULL!	#NULL!	#NULL!	#NULL!	1	1	#NULL!	#NULL!	#NULL!	#NULL!		2	2	2	2
2018-11-12 22:17:16	209	2018-11-12	Very tired	#NULL!	#NULL!	1	#NULL!	#NULL!	#NULL!	#NULL!	#NULL!	#NULL!		1	3	1	1	2	1	1	1	1	1	1	1	1	4	4	4	4	4	3	1	1	3	3	3	3	1	1	#NULL!	#NULL!	#NULL!	#NULL!		2	2	2	2
2018-11-20 20:52:34	209	2018-11-20	Tired	#NULL!	#NULL!	1	#NULL!	#NULL!	#NULL!	#NULL!	#NULL!	#NULL!		0	#NULL!	#NULL!	#NULL!	#NULL!	#NULL!	#NULL!	#NULL!	#NULL!	#NULL!	#NULL!	#NULL!	#NULL!	#NULL!	#NULL!	#NULL!	#NULL!	#NULL!	#NULL!	#NULL!	#NULL!	#NULL!	#NULL!	#NULL!	#NULL!	1	3	#NULL!	#NULL!	#NULL!	#NULL!		2	2	2	2
2018-11-26 21:10:35	209	2018-11-26	I have an upper respiratory infection which started last Monday. I am taking an antibiotic and finally starting to feel better.	#NULL!	#NULL!	1	#NULL!	#NULL!	#NULL!	#NULL!	#NULL!	#NULL!		0	#NULL!	#NULL!	#NULL!	#NULL!	#NULL!	#NULL!	#NULL!	#NULL!	#NULL!	#NULL!	#NULL!	#NULL!	#NULL!	#NULL!	#NULL!	#NULL!	#NULL!	#NULL!	#NULL!	#NULL!	#NULL!	#NULL!	#NULL!	#NULL!	1	0	#NULL!	#NULL!	#NULL!	#NULL!		#NULL!	#NULL!	#NULL!	#NULL!
2018-12-10 22:05:23	209	2018-12-10	Pretty good	#NULL!	#NULL!	1	#NULL!	#NULL!	#NULL!	#NULL!	#NULL!	#NULL!		0	#NULL!	#NULL!	#NULL!	#NULL!	#NULL!	#NULL!	#NULL!	#NULL!	#NULL!	#NULL!	#NULL!	#NULL!	#NULL!	#NULL!	#NULL!	#NULL!	#NULL!	#NULL!	#NULL!	#NULL!	#NULL!	#NULL!	#NULL!	#NULL!	1	0	#NULL!	#NULL!	#NULL!	#NULL!		#NULL!	#NULL!	#NULL!	#NULL!
2018-12-18 23:06:05	209	2018-12-18	Pretty good	#NULL!	#NULL!	1	#NULL!	#NULL!	#NULL!	#NULL!	#NULL!	#NULL!		0	#NULL!	#NULL!	#NULL!	#NULL!	#NULL!	#NULL!	#NULL!	#NULL!	#NULL!	#NULL!	#NULL!	#NULL!	#NULL!	#NULL!	#NULL!	#NULL!	#NULL!	#NULL!	#NULL!	#NULL!	#NULL!	#NULL!	#NULL!	#NULL!	1	0	#NULL!	#NULL!	#NULL!	#NULL!		#NULL!	#NULL!	#NULL!	#NULL!
2019-01-07 23:21:47	209	2019-01-07	I have a cold but I am feeling ok	#NULL!	#NULL!	1	#NULL!	#NULL!	#NULL!	#NULL!	#NULL!	#NULL!		0	#NULL!	#NULL!	#NULL!	#NULL!	#NULL!	#NULL!	#NULL!	#NULL!	#NULL!	#NULL!	#NULL!	#NULL!	#NULL!	#NULL!	#NULL!	#NULL!	#NULL!	#NULL!	#NULL!	#NULL!	#NULL!	#NULL!	#NULL!	#NULL!	1	0	#NULL!	#NULL!	#NULL!	#NULL!		#NULL!	#NULL!	#NULL!	#NULL!
2019-01-14 17:09:34	209	2019-01-14	Overall, pretty good	#NULL!	#NULL!	1	#NULL!	#NULL!	#NULL!	#NULL!	#NULL!	#NULL!		0	#NULL!	#NULL!	#NULL!	#NULL!	#NULL!	#NULL!	#NULL!	#NULL!	#NULL!	#NULL!	#NULL!	#NULL!	#NULL!	#NULL!	#NULL!	#NULL!	#NULL!	#NULL!	#NULL!	#NULL!	#NULL!	#NULL!	#NULL!	#NULL!	1	0	#NULL!	#NULL!	#NULL!	#NULL!		#NULL!	#NULL!	#NULL!	#NULL!
2019-01-23 16:24:36	209	2019-01-23	Good	#NULL!	#NULL!	1	#NULL!	#NULL!	#NULL!	#NULL!	#NULL!	#NULL!		0	#NULL!	#NULL!	#NULL!	#NULL!	#NULL!	#NULL!	#NULL!	#NULL!	#NULL!	#NULL!	#NULL!	#NULL!	#NULL!	#NULL!	#NULL!	#NULL!	#NULL!	#NULL!	#NULL!	#NULL!	#NULL!	#NULL!	#NULL!	#NULL!	1	0	#NULL!	#NULL!	#NULL!	#NULL!		#NULL!	#NULL!	#NULL!	#NULL!
2019-01-30 13:30:51	209	2019-01-30	Good	#NULL!	#NULL!	1	#NULL!	#NULL!	#NULL!	#NULL!	#NULL!	#NULL!		0	#NULL!	#NULL!	#NULL!	#NULL!	#NULL!	#NULL!	#NULL!	#NULL!	#NULL!	#NULL!	#NULL!	#NULL!	#NULL!	#NULL!	#NULL!	#NULL!	#NULL!	#NULL!	#NULL!	#NULL!	#NULL!	#NULL!	#NULL!	#NULL!	1	0	#NULL!	#NULL!	#NULL!	#NULL!		#NULL!	#NULL!	#NULL!	#NULL!
2019-02-11 12:37:52	209	2019-02-11	Pretty good	#NULL!	#NULL!	1	#NULL!	#NULL!	#NULL!	#NULL!	#NULL!	#NULL!		0	#NULL!	#NULL!	#NULL!	#NULL!	#NULL!	#NULL!	#NULL!	#NULL!	#NULL!	#NULL!	#NULL!	#NULL!	#NULL!	#NULL!	#NULL!	#NULL!	#NULL!	#NULL!	#NULL!	#NULL!	#NULL!	#NULL!	#NULL!	#NULL!	1	4	#NULL!	#NULL!	#NULL!	#NULL!		2	2	1	2
2019-02-26 10:14:32	209	2019-02-19	Good	1	#NULL!	#NULL!	#NULL!	#NULL!	#NULL!	#NULL!	#NULL!	#NULL!		#NULL!	#NULL!	#NULL!	#NULL!	#NULL!	#NULL!	#NULL!	#NULL!	#NULL!	#NULL!	#NULL!	#NULL!	#NULL!	#NULL!	#NULL!	#NULL!	#NULL!	#NULL!	#NULL!	#NULL!	#NULL!	#NULL!	#NULL!	#NULL!	#NULL!	1	4	#NULL!	#NULL!	#NULL!	#NULL!		2	2	1	2
2019-03-11 17:03:44	209	2019-03-11	Good	#NULL!	#NULL!	#NULL!	1	#NULL!	#NULL!	#NULL!	#NULL!	#NULL!		0	#NULL!	#NULL!	#NULL!	#NULL!	#NULL!	#NULL!	#NULL!	#NULL!	#NULL!	#NULL!	#NULL!	#NULL!	#NULL!	#NULL!	#NULL!	#NULL!	#NULL!	#NULL!	#NULL!	#NULL!	#NULL!	#NULL!	#NULL!	#NULL!	1	4	#NULL!	#NULL!	#NULL!	#NULL!		2	2	1	2
2019-03-18 11:56:22	209	2019-03-18	Good	#NULL!	#NULL!	#NULL!	1	#NULL!	#NULL!	#NULL!	#NULL!	#NULL!		0	#NULL!	#NULL!	#NULL!	#NULL!	#NULL!	#NULL!	#NULL!	#NULL!	#NULL!	#NULL!	#NULL!	#NULL!	#NULL!	#NULL!	#NULL!	#NULL!	#NULL!	#NULL!	#NULL!	#NULL!	#NULL!	#NULL!	#NULL!	#NULL!	1	1	#NULL!	#NULL!	#NULL!	#NULL!		2	2	1	2
2018-08-02 11:53:35	210	2018-08-02	okay	#NULL!	#NULL!	#NULL!	#NULL!	#NULL!	#NULL!	#NULL!	#NULL!	#NULL!		0	#NULL!	#NULL!	#NULL!	#NULL!	#NULL!	#NULL!	#NULL!	#NULL!	#NULL!	#NULL!	#NULL!	#NULL!	#NULL!	#NULL!	#NULL!	#NULL!	#NULL!	#NULL!	#NULL!	#NULL!	#NULL!	#NULL!	#NULL!	#NULL!	1	2	#NULL!	#NULL!	#NULL!	#NULL!		#NULL!	#NULL!	#NULL!	#NULL!
2018-08-13 11:40:04	210	2018-08-13	sore	1	#NULL!	#NULL!	#NULL!	#NULL!	#NULL!	#NULL!	#NULL!	#NULL!		1	5	1	2	3	3	1	2	4	1	3	3	2	4	4	4	4	3	2	4	5	4	4	4	3	1	5	#NULL!	#NULL!	#NULL!	#NULL!		3	4	3	4
2018-08-23 10:19:39	210	2018-08-23	miserable. uncomfortable	1	#NULL!	#NULL!	#NULL!	#NULL!	#NULL!	#NULL!	#NULL!	#NULL!		0	#NULL!	#NULL!	#NULL!	#NULL!	#NULL!	#NULL!	#NULL!	#NULL!	#NULL!	#NULL!	#NULL!	#NULL!	#NULL!	#NULL!	#NULL!	#NULL!	#NULL!	#NULL!	#NULL!	#NULL!	#NULL!	#NULL!	#NULL!	#NULL!	2	8	#NULL!	#NULL!	#NULL!	#NULL!		4	3	3	4
2018-09-13 13:34:35	210	2018-09-13	sore	#NULL!	#NULL!	#NULL!	#NULL!	#NULL!	#NULL!	#NULL!	#NULL!	#NULL!		0	#NULL!	#NULL!	#NULL!	#NULL!	#NULL!	#NULL!	#NULL!	#NULL!	#NULL!	#NULL!	#NULL!	#NULL!	#NULL!	#NULL!	#NULL!	#NULL!	#NULL!	#NULL!	#NULL!	#NULL!	#NULL!	#NULL!	#NULL!	#NULL!	1	5	#NULL!	#NULL!	#NULL!	#NULL!		4	4	4	4
2018-09-21 14:59:03	210	2018-09-21	Sore, hungry. Liquid diet	1	#NULL!	#NULL!	#NULL!	#NULL!	#NULL!	#NULL!	#NULL!	#NULL!		1	5	5	4	5	1	3	3	3	3	3	1	1	5	4	4	4	1	1	4	4	5	5	5	5	1	4	#NULL!	#NULL!	#NULL!	#NULL!		5	5	5	5
2018-09-25 13:41:01	210	2018-09-25	good. some pain on left side where lymphnodes taken out.	1	#NULL!	#NULL!	#NULL!	#NULL!	#NULL!	#NULL!	#NULL!	#NULL!		0	#NULL!	#NULL!	#NULL!	#NULL!	#NULL!	#NULL!	#NULL!	#NULL!	#NULL!	#NULL!	#NULL!	#NULL!	#NULL!	#NULL!	#NULL!	#NULL!	#NULL!	#NULL!	#NULL!	#NULL!	#NULL!	#NULL!	#NULL!	#NULL!	1	4	#NULL!	#NULL!	#NULL!	#NULL!		3	3	4	3
2018-11-05 14:22:25	210	2018-11-05	tired	#NULL!	#NULL!	#NULL!	1	#NULL!	#NULL!	#NULL!	#NULL!	#NULL!		0	#NULL!	#NULL!	#NULL!	#NULL!	#NULL!	#NULL!	#NULL!	#NULL!	#NULL!	#NULL!	#NULL!	#NULL!	#NULL!	#NULL!	#NULL!	#NULL!	#NULL!	#NULL!	#NULL!	#NULL!	#NULL!	#NULL!	#NULL!	#NULL!	1	4	#NULL!	#NULL!	#NULL!	#NULL!		2	4	2	4
2018-08-17 19:09:10	211	2018-08-17	Good	#NULL!	#NULL!	#NULL!	#NULL!	#NULL!	#NULL!	#NULL!	#NULL!	#NULL!		0	#NULL!	#NULL!	#NULL!	#NULL!	#NULL!	#NULL!	#NULL!	#NULL!	#NULL!	#NULL!	#NULL!	#NULL!	#NULL!	#NULL!	#NULL!	#NULL!	#NULL!	#NULL!	#NULL!	#NULL!	#NULL!	#NULL!	#NULL!	#NULL!	2	7	#NULL!	#NULL!	#NULL!	#NULL!		4	4	4	4
2018-08-21 11:26:26	211	2018-08-21	Ok	#NULL!	#NULL!	#NULL!	#NULL!	#NULL!	#NULL!	#NULL!	#NULL!	#NULL!		1	5	3	2	3	1	3	3	3	1	1	3	1	5	4	3	4	2	1	4	2	4	4	4	4	2	7	#NULL!	#NULL!	#NULL!	#NULL!		4	4	3	4
2018-08-27 13:54:41	211	2018-08-27	Not Good. Infection at surgery site.	#NULL!	#NULL!	#NULL!	#NULL!	#NULL!	#NULL!	#NULL!	#NULL!	#NULL!		1	5	3	3	3	1	2	2	3	1	1	3	1	5	5	4	4	2	1	5	3	4	4	4	4	3	9	#NULL!	#NULL!	#NULL!	#NULL!		5	5	5	5
2018-09-13 16:36:09	211	2018-09-13	Good	#NULL!	#NULL!	#NULL!	#NULL!	#NULL!	#NULL!	#NULL!	#NULL!	#NULL!		1	5	1	2	2	1	1	1	1	1	1	3	1	4	4	3	3	2	1	4	3	3	3	3	3	1	4	#NULL!	#NULL!	#NULL!	#NULL!		1	1	1	1
2018-09-17 13:55:59	211	2018-09-17	Good	#NULL!	#NULL!	1	#NULL!	#NULL!	#NULL!	#NULL!	#NULL!	#NULL!		0	#NULL!	#NULL!	#NULL!	#NULL!	#NULL!	#NULL!	#NULL!	#NULL!	#NULL!	#NULL!	#NULL!	#NULL!	#NULL!	#NULL!	#NULL!	#NULL!	#NULL!	#NULL!	#NULL!	#NULL!	#NULL!	#NULL!	#NULL!	#NULL!	1	1	#NULL!	#NULL!	#NULL!	#NULL!		1	1	1	1
2018-11-05 12:20:43	211	2018-11-05	Good	#NULL!	#NULL!	1	#NULL!	#NULL!	#NULL!	#NULL!	#NULL!	#NULL!		0	#NULL!	#NULL!	#NULL!	#NULL!	#NULL!	#NULL!	#NULL!	#NULL!	#NULL!	#NULL!	#NULL!	#NULL!	#NULL!	#NULL!	#NULL!	#NULL!	#NULL!	#NULL!	#NULL!	#NULL!	#NULL!	#NULL!	#NULL!	#NULL!	1	3	#NULL!	#NULL!	#NULL!	#NULL!		2	2	2	2
2018-11-13 16:17:03	211	2018-11-13	Ok	#NULL!	#NULL!	1	#NULL!	#NULL!	#NULL!	#NULL!	#NULL!	#NULL!		0	#NULL!	#NULL!	#NULL!	#NULL!	#NULL!	#NULL!	#NULL!	#NULL!	#NULL!	#NULL!	#NULL!	#NULL!	#NULL!	#NULL!	#NULL!	#NULL!	#NULL!	#NULL!	#NULL!	#NULL!	#NULL!	#NULL!	#NULL!	#NULL!	1	6	#NULL!	#NULL!	#NULL!	#NULL!		4	4	4	4
2018-11-27 07:58:48	211	2018-11-27	Ok	#NULL!	#NULL!	1	#NULL!	#NULL!	#NULL!	#NULL!	#NULL!	#NULL!		0	#NULL!	#NULL!	#NULL!	#NULL!	#NULL!	#NULL!	#NULL!	#NULL!	#NULL!	#NULL!	#NULL!	#NULL!	#NULL!	#NULL!	#NULL!	#NULL!	#NULL!	#NULL!	#NULL!	#NULL!	#NULL!	#NULL!	#NULL!	#NULL!	1	3	#NULL!	#NULL!	#NULL!	#NULL!		2	2	2	2
2018-12-10 15:55:33	211	2018-12-10	Ok	#NULL!	#NULL!	1	#NULL!	#NULL!	#NULL!	#NULL!	#NULL!	#NULL!		0	#NULL!	#NULL!	#NULL!	#NULL!	#NULL!	#NULL!	#NULL!	#NULL!	#NULL!	#NULL!	#NULL!	#NULL!	#NULL!	#NULL!	#NULL!	#NULL!	#NULL!	#NULL!	#NULL!	#NULL!	#NULL!	#NULL!	#NULL!	#NULL!	1	2	#NULL!	#NULL!	#NULL!	#NULL!		2	2	2	2
2018-12-17 16:46:36	211	2018-12-17	Ok	#NULL!	#NULL!	1	#NULL!	#NULL!	#NULL!	#NULL!	#NULL!	#NULL!		0	#NULL!	#NULL!	#NULL!	#NULL!	#NULL!	#NULL!	#NULL!	#NULL!	#NULL!	#NULL!	#NULL!	#NULL!	#NULL!	#NULL!	#NULL!	#NULL!	#NULL!	#NULL!	#NULL!	#NULL!	#NULL!	#NULL!	#NULL!	#NULL!	1	3	#NULL!	#NULL!	#NULL!	#NULL!		2	2	2	2
2019-01-07 11:53:40	211	2019-01-07	Ok	#NULL!	#NULL!	1	#NULL!	#NULL!	#NULL!	#NULL!	#NULL!	#NULL!		0	#NULL!	#NULL!	#NULL!	#NULL!	#NULL!	#NULL!	#NULL!	#NULL!	#NULL!	#NULL!	#NULL!	#NULL!	#NULL!	#NULL!	#NULL!	#NULL!	#NULL!	#NULL!	#NULL!	#NULL!	#NULL!	#NULL!	#NULL!	#NULL!	2	7	#NULL!	#NULL!	#NULL!	#NULL!		3	3	3	3
2019-01-14 14:12:06	211	2019-01-14	Ok	#NULL!	#NULL!	1	1	#NULL!	#NULL!	#NULL!	#NULL!	#NULL!		0	#NULL!	#NULL!	#NULL!	#NULL!	#NULL!	#NULL!	#NULL!	#NULL!	#NULL!	#NULL!	#NULL!	#NULL!	#NULL!	#NULL!	#NULL!	#NULL!	#NULL!	#NULL!	#NULL!	#NULL!	#NULL!	#NULL!	#NULL!	#NULL!	1	6	#NULL!	#NULL!	#NULL!	#NULL!		2	2	2	2
2019-01-24 17:16:12	211	2019-01-24	Ok	#NULL!	#NULL!	1	#NULL!	#NULL!	#NULL!	#NULL!	#NULL!	#NULL!		0	#NULL!	#NULL!	#NULL!	#NULL!	#NULL!	#NULL!	#NULL!	#NULL!	#NULL!	#NULL!	#NULL!	#NULL!	#NULL!	#NULL!	#NULL!	#NULL!	#NULL!	#NULL!	#NULL!	#NULL!	#NULL!	#NULL!	#NULL!	#NULL!	1	5	#NULL!	#NULL!	#NULL!	#NULL!		2	2	1	2
2019-02-12 22:49:43	211	2019-01-12	Ok	#NULL!	#NULL!	1	#NULL!	#NULL!	#NULL!	#NULL!	#NULL!	#NULL!		0	#NULL!	#NULL!	#NULL!	#NULL!	#NULL!	#NULL!	#NULL!	#NULL!	#NULL!	#NULL!	#NULL!	#NULL!	#NULL!	#NULL!	#NULL!	#NULL!	#NULL!	#NULL!	#NULL!	#NULL!	#NULL!	#NULL!	#NULL!	#NULL!	1	3	#NULL!	#NULL!	#NULL!	#NULL!		1	1	1	1
2019-02-22 10:49:49	211	2019-02-22	Ok	#NULL!	#NULL!	1	#NULL!	#NULL!	#NULL!	#NULL!	#NULL!	#NULL!		0	#NULL!	#NULL!	#NULL!	#NULL!	#NULL!	#NULL!	#NULL!	#NULL!	#NULL!	#NULL!	#NULL!	#NULL!	#NULL!	#NULL!	#NULL!	#NULL!	#NULL!	#NULL!	#NULL!	#NULL!	#NULL!	#NULL!	#NULL!	#NULL!	1	2	#NULL!	#NULL!	#NULL!	#NULL!		1	1	3	1
2019-02-26 14:35:37	211	2019-02-26	Ok	#NULL!	#NULL!	1	#NULL!	1	#NULL!	1	#NULL!	#NULL!		0	#NULL!	#NULL!	#NULL!	#NULL!	#NULL!	#NULL!	#NULL!	#NULL!	#NULL!	#NULL!	#NULL!	#NULL!	#NULL!	#NULL!	#NULL!	#NULL!	#NULL!	#NULL!	#NULL!	#NULL!	#NULL!	#NULL!	#NULL!	#NULL!	1	2	#NULL!	#NULL!	#NULL!	#NULL!		1	1	1	1
2019-03-14 09:32:04	211	2019-03-13	Ok	#NULL!	#NULL!	1	#NULL!	1	#NULL!	#NULL!	#NULL!	1	Nerlynx	1	3	1	3	3	1	1	1	1	1	1	3	1	3	3	3	3	2	2	2	3	3	3	3	3	1	3	#NULL!	#NULL!	#NULL!	#NULL!		2	2	2	2
2019-03-21 17:18:14	211	#NULL!	Ok	#NULL!	#NULL!	1	#NULL!	1	#NULL!	#NULL!	#NULL!	1	Nerlynx	0	#NULL!	#NULL!	#NULL!	#NULL!	#NULL!	#NULL!	#NULL!	#NULL!	#NULL!	#NULL!	#NULL!	#NULL!	#NULL!	#NULL!	#NULL!	#NULL!	#NULL!	#NULL!	#NULL!	#NULL!	#NULL!	#NULL!	#NULL!	#NULL!	1	1	#NULL!	#NULL!	#NULL!	#NULL!		1	1	1	1
2019-03-25 19:48:53	211	2019-03-25	Ok	#NULL!	#NULL!	1	#NULL!	1	#NULL!	#NULL!	#NULL!	1	Nerlynx	0	#NULL!	#NULL!	#NULL!	#NULL!	#NULL!	#NULL!	#NULL!	#NULL!	#NULL!	#NULL!	#NULL!	#NULL!	#NULL!	#NULL!	#NULL!	#NULL!	#NULL!	#NULL!	#NULL!	#NULL!	#NULL!	#NULL!	#NULL!	#NULL!	1	3	#NULL!	#NULL!	#NULL!	#NULL!		2	2	2	2
2019-04-15 11:33:06	211	2019-04-15	Ok	#NULL!	#NULL!	1	#NULL!	1	#NULL!	#NULL!	#NULL!	1	Nerlynx	0	#NULL!	#NULL!	#NULL!	#NULL!	#NULL!	#NULL!	#NULL!	#NULL!	#NULL!	#NULL!	#NULL!	#NULL!	#NULL!	#NULL!	#NULL!	#NULL!	#NULL!	#NULL!	#NULL!	#NULL!	#NULL!	#NULL!	#NULL!	#NULL!	1	3	#NULL!	#NULL!	#NULL!	#NULL!		1	1	1	1
2019-04-22 11:24:54	211	2019-04-22	Ok	#NULL!	#NULL!	1	#NULL!	1	#NULL!	#NULL!	#NULL!	1	Nerlynx	0	#NULL!	#NULL!	#NULL!	#NULL!	#NULL!	#NULL!	#NULL!	#NULL!	#NULL!	#NULL!	#NULL!	#NULL!	#NULL!	#NULL!	#NULL!	#NULL!	#NULL!	#NULL!	#NULL!	#NULL!	#NULL!	#NULL!	#NULL!	#NULL!	1	3	#NULL!	#NULL!	#NULL!	#NULL!		2	2	2	2
2019-05-16 08:38:44	211	2019-05-15	Ok	#NULL!	#NULL!	1	#NULL!	1	#NULL!	#NULL!	#NULL!	1	Nerlynx	0	#NULL!	#NULL!	#NULL!	#NULL!	#NULL!	#NULL!	#NULL!	#NULL!	#NULL!	#NULL!	#NULL!	#NULL!	#NULL!	#NULL!	#NULL!	#NULL!	#NULL!	#NULL!	#NULL!	#NULL!	#NULL!	#NULL!	#NULL!	#NULL!	1	3	#NULL!	#NULL!	#NULL!	#NULL!		2	2	2	2
2019-06-10 10:01:43	211	2019-06-10	Ok	#NULL!	#NULL!	1	#NULL!	1	#NULL!	#NULL!	#NULL!	1	Nerlynx	0	#NULL!	#NULL!	#NULL!	#NULL!	#NULL!	#NULL!	#NULL!	#NULL!	#NULL!	#NULL!	#NULL!	#NULL!	#NULL!	#NULL!	#NULL!	#NULL!	#NULL!	#NULL!	#NULL!	#NULL!	#NULL!	#NULL!	#NULL!	#NULL!	1	3	#NULL!	#NULL!	#NULL!	#NULL!		2	2	2	2
2019-06-17 17:23:13	211	2019-06-18	Ok	#NULL!	#NULL!	1	#NULL!	1	#NULL!	#NULL!	#NULL!	1	Nerlynx	0	#NULL!	#NULL!	#NULL!	#NULL!	#NULL!	#NULL!	#NULL!	#NULL!	#NULL!	#NULL!	#NULL!	#NULL!	#NULL!	#NULL!	#NULL!	#NULL!	#NULL!	#NULL!	#NULL!	#NULL!	#NULL!	#NULL!	#NULL!	#NULL!	1	3	#NULL!	#NULL!	#NULL!	#NULL!		2	2	2	2
2019-06-27 10:37:05	211	2019-06-27	Ok	#NULL!	#NULL!	1	#NULL!	1	#NULL!	#NULL!	#NULL!	1	Nerlynx	0	#NULL!	#NULL!	#NULL!	#NULL!	#NULL!	#NULL!	#NULL!	#NULL!	#NULL!	#NULL!	#NULL!	#NULL!	#NULL!	#NULL!	#NULL!	#NULL!	#NULL!	#NULL!	#NULL!	#NULL!	#NULL!	#NULL!	#NULL!	#NULL!	1	3	#NULL!	#NULL!	#NULL!	#NULL!		2	2	2	2
2019-07-17 17:29:14	211	2019-07-17	Ok	#NULL!	#NULL!	1	#NULL!	1	#NULL!	#NULL!	#NULL!	1	Nerlynx	0	#NULL!	#NULL!	#NULL!	#NULL!	#NULL!	#NULL!	#NULL!	#NULL!	#NULL!	#NULL!	#NULL!	#NULL!	#NULL!	#NULL!	#NULL!	#NULL!	#NULL!	#NULL!	#NULL!	#NULL!	#NULL!	#NULL!	#NULL!	#NULL!	1	2	#NULL!	#NULL!	#NULL!	#NULL!		2	2	2	2
2019-08-13 21:46:52	211	2019-08-13	Ok	#NULL!	#NULL!	1	#NULL!	1	#NULL!	#NULL!	#NULL!	1	Nerlynx	0	#NULL!	#NULL!	#NULL!	#NULL!	#NULL!	#NULL!	#NULL!	#NULL!	#NULL!	#NULL!	#NULL!	#NULL!	#NULL!	#NULL!	#NULL!	#NULL!	#NULL!	#NULL!	#NULL!	#NULL!	#NULL!	#NULL!	#NULL!	#NULL!	1	4	#NULL!	#NULL!	#NULL!	#NULL!		2	2	2	2
2019-08-21 15:06:33	211	2019-08-21	Ok	#NULL!	#NULL!	1	#NULL!	1	#NULL!	#NULL!	#NULL!	1	Nerlynx	0	#NULL!	#NULL!	#NULL!	#NULL!	#NULL!	#NULL!	#NULL!	#NULL!	#NULL!	#NULL!	#NULL!	#NULL!	#NULL!	#NULL!	#NULL!	#NULL!	#NULL!	#NULL!	#NULL!	#NULL!	#NULL!	#NULL!	#NULL!	#NULL!	1	3	#NULL!	#NULL!	#NULL!	#NULL!		2	2	2	2
2018-08-01 10:53:14	212	2018-08-01	good	#NULL!	#NULL!	#NULL!	#NULL!	#NULL!	#NULL!	#NULL!	#NULL!	#NULL!		0	#NULL!	#NULL!	#NULL!	#NULL!	#NULL!	#NULL!	#NULL!	#NULL!	#NULL!	#NULL!	#NULL!	#NULL!	#NULL!	#NULL!	#NULL!	#NULL!	#NULL!	#NULL!	#NULL!	#NULL!	#NULL!	#NULL!	#NULL!	#NULL!	1	3	#NULL!	#NULL!	#NULL!	#NULL!		#NULL!	#NULL!	#NULL!	#NULL!
2018-08-08 10:06:48	212	2018-08-08	good	#NULL!	#NULL!	#NULL!	#NULL!	#NULL!	#NULL!	#NULL!	#NULL!	#NULL!		0	#NULL!	#NULL!	#NULL!	#NULL!	#NULL!	#NULL!	#NULL!	#NULL!	#NULL!	#NULL!	#NULL!	#NULL!	#NULL!	#NULL!	#NULL!	#NULL!	#NULL!	#NULL!	#NULL!	#NULL!	#NULL!	#NULL!	#NULL!	#NULL!	1	1	#NULL!	#NULL!	#NULL!	#NULL!		1	1	1	1
2018-08-14 11:28:16	212	2018-08-14	good	#NULL!	#NULL!	#NULL!	#NULL!	#NULL!	#NULL!	#NULL!	#NULL!	#NULL!		0	#NULL!	#NULL!	#NULL!	#NULL!	#NULL!	#NULL!	#NULL!	#NULL!	#NULL!	#NULL!	#NULL!	#NULL!	#NULL!	#NULL!	#NULL!	#NULL!	#NULL!	#NULL!	#NULL!	#NULL!	#NULL!	#NULL!	#NULL!	#NULL!	1	2	#NULL!	#NULL!	#NULL!	#NULL!		1	1	1	1
2018-07-30 13:44:42	213	2018-07-30	feel well	#NULL!	#NULL!	#NULL!	#NULL!	#NULL!	#NULL!	#NULL!	#NULL!	#NULL!		0	#NULL!	#NULL!	#NULL!	#NULL!	#NULL!	#NULL!	#NULL!	#NULL!	#NULL!	#NULL!	#NULL!	#NULL!	#NULL!	#NULL!	#NULL!	#NULL!	#NULL!	#NULL!	#NULL!	#NULL!	#NULL!	#NULL!	#NULL!	#NULL!	1	2	#NULL!	#NULL!	#NULL!	#NULL!		#NULL!	#NULL!	#NULL!	#NULL!
2018-08-07 08:37:55	213	2018-08-07	good!	#NULL!	#NULL!	#NULL!	#NULL!	#NULL!	#NULL!	#NULL!	#NULL!	#NULL!		0	#NULL!	#NULL!	#NULL!	#NULL!	#NULL!	#NULL!	#NULL!	#NULL!	#NULL!	#NULL!	#NULL!	#NULL!	#NULL!	#NULL!	#NULL!	#NULL!	#NULL!	#NULL!	#NULL!	#NULL!	#NULL!	#NULL!	#NULL!	#NULL!	1	0	#NULL!	#NULL!	#NULL!	#NULL!		#NULL!	#NULL!	#NULL!	#NULL!
2018-08-22 20:59:00	213	2018-08-22	good	#NULL!	#NULL!	#NULL!	#NULL!	#NULL!	#NULL!	#NULL!	#NULL!	#NULL!		0	#NULL!	#NULL!	#NULL!	#NULL!	#NULL!	#NULL!	#NULL!	#NULL!	#NULL!	#NULL!	#NULL!	#NULL!	#NULL!	#NULL!	#NULL!	#NULL!	#NULL!	#NULL!	#NULL!	#NULL!	#NULL!	#NULL!	#NULL!	#NULL!	1	0	#NULL!	#NULL!	#NULL!	#NULL!		#NULL!	#NULL!	#NULL!	#NULL!
2018-08-28 12:39:41	213	2018-08-28	good	#NULL!	#NULL!	#NULL!	#NULL!	#NULL!	#NULL!	#NULL!	#NULL!	#NULL!		0	#NULL!	#NULL!	#NULL!	#NULL!	#NULL!	#NULL!	#NULL!	#NULL!	#NULL!	#NULL!	#NULL!	#NULL!	#NULL!	#NULL!	#NULL!	#NULL!	#NULL!	#NULL!	#NULL!	#NULL!	#NULL!	#NULL!	#NULL!	#NULL!	1	0	#NULL!	#NULL!	#NULL!	#NULL!		#NULL!	#NULL!	#NULL!	#NULL!
2018-09-11 06:00:13	213	2018-09-11	good	#NULL!	#NULL!	#NULL!	#NULL!	#NULL!	#NULL!	#NULL!	#NULL!	#NULL!		0	#NULL!	#NULL!	#NULL!	#NULL!	#NULL!	#NULL!	#NULL!	#NULL!	#NULL!	#NULL!	#NULL!	#NULL!	#NULL!	#NULL!	#NULL!	#NULL!	#NULL!	#NULL!	#NULL!	#NULL!	#NULL!	#NULL!	#NULL!	#NULL!	1	0	#NULL!	#NULL!	#NULL!	#NULL!		#NULL!	#NULL!	#NULL!	#NULL!
2018-10-25 07:48:49	213	2018-10-25	good	1	#NULL!	#NULL!	#NULL!	#NULL!	#NULL!	#NULL!	#NULL!	#NULL!		0	#NULL!	#NULL!	#NULL!	#NULL!	#NULL!	#NULL!	#NULL!	#NULL!	#NULL!	#NULL!	#NULL!	#NULL!	#NULL!	#NULL!	#NULL!	#NULL!	#NULL!	#NULL!	#NULL!	#NULL!	#NULL!	#NULL!	#NULL!	#NULL!	1	0	#NULL!	#NULL!	#NULL!	#NULL!		#NULL!	#NULL!	#NULL!	#NULL!
2018-11-06 13:03:20	213	2018-11-06	great	#NULL!	#NULL!	#NULL!	1	#NULL!	#NULL!	#NULL!	#NULL!	#NULL!		#NULL!	#NULL!	#NULL!	#NULL!	#NULL!	#NULL!	#NULL!	#NULL!	#NULL!	#NULL!	#NULL!	#NULL!	#NULL!	#NULL!	#NULL!	#NULL!	#NULL!	#NULL!	#NULL!	#NULL!	#NULL!	#NULL!	#NULL!	#NULL!	#NULL!	1	0	#NULL!	#NULL!	#NULL!	#NULL!		#NULL!	#NULL!	#NULL!	#NULL!
2018-09-11 10:27:21	214	2018-09-11	pretty good. healed well. emotionally difficult	1	#NULL!	#NULL!	#NULL!	#NULL!	#NULL!	#NULL!	#NULL!	#NULL!		1	5	1	2	1	3	3	2	4	1	1	3	1	3	2	3	2	3	4	3	4	3	3	3	3	1	3	#NULL!	#NULL!	#NULL!	#NULL!		2	2	2	2
2018-09-18 10:06:42	214	2018-09-18	pretty anxious	#NULL!	#NULL!	#NULL!	1	#NULL!	#NULL!	#NULL!	#NULL!	#NULL!		0	#NULL!	#NULL!	#NULL!	#NULL!	#NULL!	#NULL!	#NULL!	#NULL!	#NULL!	#NULL!	#NULL!	#NULL!	#NULL!	#NULL!	#NULL!	#NULL!	#NULL!	#NULL!	#NULL!	#NULL!	#NULL!	#NULL!	#NULL!	#NULL!	1	5	#NULL!	#NULL!	#NULL!	#NULL!		3	3	3	4
2018-09-25 14:27:00	214	2018-09-25	better	#NULL!	#NULL!	#NULL!	1	#NULL!	#NULL!	#NULL!	#NULL!	#NULL!		0	#NULL!	#NULL!	#NULL!	#NULL!	#NULL!	#NULL!	#NULL!	#NULL!	#NULL!	#NULL!	#NULL!	#NULL!	#NULL!	#NULL!	#NULL!	#NULL!	#NULL!	#NULL!	#NULL!	#NULL!	#NULL!	#NULL!	#NULL!	#NULL!	1	5	#NULL!	#NULL!	#NULL!	#NULL!		3	3	3	3
2018-10-16 10:25:11	214	2018-10-16	had nausea while traveling florida	#NULL!	#NULL!	#NULL!	1	#NULL!	#NULL!	#NULL!	#NULL!	#NULL!		0	#NULL!	#NULL!	#NULL!	#NULL!	#NULL!	#NULL!	#NULL!	#NULL!	#NULL!	#NULL!	#NULL!	#NULL!	#NULL!	#NULL!	#NULL!	#NULL!	#NULL!	#NULL!	#NULL!	#NULL!	#NULL!	#NULL!	#NULL!	#NULL!	1	6	#NULL!	#NULL!	#NULL!	#NULL!		4	4	4	4
2018-10-16 10:30:08	214	2018-10-12	Struggling--new medication--Arimidex	#NULL!	#NULL!	#NULL!	#NULL!	#NULL!	#NULL!	#NULL!	#NULL!	#NULL!		0	4	5	5	4	3	3	2	5	1	3	3	1	5	5	5	5	1	5	5	5	2	2	5	5	3	9	#NULL!	#NULL!	#NULL!	#NULL!		5	5	5	5
2018-11-12 16:16:28	214	2018-11-12	Bouts of stomach upset, unable to keep supplements down	#NULL!	#NULL!	#NULL!	1	#NULL!	#NULL!	#NULL!	#NULL!	#NULL!		#NULL!	#NULL!	#NULL!	#NULL!	#NULL!	#NULL!	#NULL!	#NULL!	#NULL!	#NULL!	#NULL!	#NULL!	#NULL!	#NULL!	#NULL!	#NULL!	#NULL!	#NULL!	#NULL!	#NULL!	#NULL!	#NULL!	#NULL!	#NULL!	#NULL!	2	7	#NULL!	#NULL!	#NULL!	#NULL!		4	4	4	4
2018-11-27 13:44:47	214	2018-11-27	Exhausted but due to company	#NULL!	#NULL!	#NULL!	1	#NULL!	#NULL!	#NULL!	#NULL!	#NULL!		#NULL!	#NULL!	#NULL!	#NULL!	#NULL!	#NULL!	#NULL!	#NULL!	#NULL!	#NULL!	#NULL!	#NULL!	#NULL!	#NULL!	#NULL!	#NULL!	#NULL!	#NULL!	#NULL!	#NULL!	#NULL!	#NULL!	#NULL!	#NULL!	#NULL!	1	4	#NULL!	#NULL!	#NULL!	#NULL!		4	3	3	3
2018-09-21 16:11:41	215	2018-09-21	alright, lymph nodes taken on wednesday. feeling a little tired	1	#NULL!	#NULL!	#NULL!	#NULL!	#NULL!	#NULL!	#NULL!	#NULL!		0	#NULL!	#NULL!	#NULL!	#NULL!	#NULL!	#NULL!	#NULL!	#NULL!	#NULL!	#NULL!	#NULL!	#NULL!	#NULL!	#NULL!	#NULL!	#NULL!	#NULL!	#NULL!	#NULL!	#NULL!	#NULL!	#NULL!	#NULL!	#NULL!	1	3	#NULL!	#NULL!	#NULL!	#NULL!		4	4	2	4
2018-09-25 12:30:17	215	2018-09-25	things are about the same	1	#NULL!	#NULL!	#NULL!	#NULL!	#NULL!	#NULL!	#NULL!	#NULL!		0	#NULL!	#NULL!	#NULL!	#NULL!	#NULL!	#NULL!	#NULL!	#NULL!	#NULL!	#NULL!	#NULL!	#NULL!	#NULL!	#NULL!	#NULL!	#NULL!	#NULL!	#NULL!	#NULL!	#NULL!	#NULL!	#NULL!	#NULL!	#NULL!	1	4	#NULL!	#NULL!	#NULL!	#NULL!		4	4	4	4
2018-10-16 10:30:08	216	2018-10-12	Been feeling ok, left arm feels almost normal, started chemo so i dont feel great	#NULL!	#NULL!	#NULL!	#NULL!	#NULL!	#NULL!	#NULL!	#NULL!	#NULL!		0	3	2	3	1	3	1	1	3	1	3	2	1	4	4	4	4	4	4	1	1	4	4	4	4	1	4	#NULL!	#NULL!	#NULL!	#NULL!		3	3	3	3
2018-10-30 12:02:18	216	2018-10-05	my incisions have healed well and I feel almost normal in my left arm. Unfortunatley I have begun chemo so I don't feel great!	#NULL!	#NULL!	1	#NULL!	#NULL!	#NULL!	#NULL!	#NULL!	#NULL!		1	3	2	3	5	3	1	1	3	1	3	2	1	4	4	4	4	4	4	1	1	4	4	4	4	1	4	#NULL!	#NULL!	#NULL!	#NULL!		#NULL!	#NULL!	#NULL!	#NULL!
2018-11-07 10:08:49	216	2018-11-07	Pretty good. It was week 3 of Chemo, so fewer side effects.	#NULL!	#NULL!	1	#NULL!	#NULL!	#NULL!	#NULL!	#NULL!	#NULL!		1	4	2	2	2	2	1	1	2	1	1	1	1	2	2	2	2	4	3	2	2	3	3	3	3	1	3	#NULL!	#NULL!	#NULL!	#NULL!		2	3	2	2
2018-11-30 11:29:30	216	2018-11-26	Pretty good	#NULL!	#NULL!	1	#NULL!	#NULL!	#NULL!	#NULL!	#NULL!	#NULL!		1	2	2	1	1	2	1	3	3	1	2	3	1	3	2	3	3	3	3	1	2	2	3	3	3	1	3	#NULL!	#NULL!	#NULL!	#NULL!		3	3	3	3
2018-12-03 14:50:05	216	2018-11-26	Pretty good	#NULL!	#NULL!	1	#NULL!	#NULL!	#NULL!	#NULL!	#NULL!	#NULL!		1	2	2	1	1	2	1	3	3	1	2	3	1	3	2	3	3	3	3	1	2	2	3	3	3	1	3	#NULL!	#NULL!	#NULL!	#NULL!		3	3	3	3
2018-12-12 10:06:07	216	2018-12-12	Better	#NULL!	#NULL!	1	#NULL!	#NULL!	#NULL!	#NULL!	#NULL!	#NULL!		1	3	2	1	3	1	1	1	3	1	1	3	1	4	3	4	4	4	3	1	1	4	4	4	4	1	3	#NULL!	#NULL!	#NULL!	#NULL!		3	3	3	3
2018-12-17 16:27:17	216	2018-12-17	It has been a much better week, I feel pretty good!	#NULL!	#NULL!	1	#NULL!	#NULL!	#NULL!	#NULL!	#NULL!	#NULL!		1	2	2	1	2	1	1	1	1	1	1	2	1	2	1	2	2	4	4	1	1	2	2	2	2	1	2	#NULL!	#NULL!	#NULL!	#NULL!		1	1	1	1
2019-01-08 13:03:10	216	2019-01-08	Good!	#NULL!	#NULL!	1	#NULL!	#NULL!	#NULL!	#NULL!	#NULL!	#NULL!		1	3	3	3	3	1	1	1	1	1	1	1	1	2	2	2	2	4	3	2	1	3	3	4	3	1	3	#NULL!	#NULL!	#NULL!	#NULL!		3	3	3	3
2019-01-14 13:26:32	216	2019-01-14	Terrible	#NULL!	#NULL!	1	#NULL!	#NULL!	#NULL!	#NULL!	#NULL!	#NULL!		1	5	5	5	5	2	1	1	2	1	1	3	1	5	5	5	5	3	2	3	3	5	5	5	5	1	5	#NULL!	#NULL!	#NULL!	#NULL!		3	3	3	3
2019-02-06 11:47:35	216	2019-01-30	good	1	#NULL!	#NULL!	#NULL!	#NULL!	#NULL!	#NULL!	#NULL!	#NULL!		#NULL!	#NULL!	#NULL!	#NULL!	#NULL!	#NULL!	#NULL!	#NULL!	#NULL!	#NULL!	#NULL!	#NULL!	#NULL!	#NULL!	#NULL!	#NULL!	#NULL!	#NULL!	#NULL!	#NULL!	#NULL!	#NULL!	#NULL!	#NULL!	#NULL!	1	0	#NULL!	#NULL!	#NULL!	#NULL!		#NULL!	#NULL!	#NULL!	#NULL!
2019-02-11 12:38:36	216	2019-02-11	Great	1	#NULL!	#NULL!	#NULL!	#NULL!	#NULL!	#NULL!	#NULL!	#NULL!		#NULL!	#NULL!	#NULL!	#NULL!	#NULL!	#NULL!	#NULL!	#NULL!	#NULL!	#NULL!	#NULL!	#NULL!	#NULL!	#NULL!	#NULL!	#NULL!	#NULL!	#NULL!	#NULL!	#NULL!	#NULL!	#NULL!	#NULL!	#NULL!	#NULL!	1	2	#NULL!	#NULL!	#NULL!	#NULL!		2	2	2	2
2019-02-19 09:37:21	216	2019-02-19	Good!	1	#NULL!	#NULL!	#NULL!	#NULL!	#NULL!	#NULL!	#NULL!	#NULL!		#NULL!	#NULL!	#NULL!	#NULL!	#NULL!	#NULL!	#NULL!	#NULL!	#NULL!	#NULL!	#NULL!	#NULL!	#NULL!	#NULL!	#NULL!	#NULL!	#NULL!	#NULL!	#NULL!	#NULL!	#NULL!	#NULL!	#NULL!	#NULL!	#NULL!	1	3	#NULL!	#NULL!	#NULL!	#NULL!		2	2	1	2
2019-03-25 11:10:58	216	2019-03-25	Good	#NULL!	#NULL!	#NULL!	#NULL!	#NULL!	#NULL!	1	#NULL!	#NULL!		0	#NULL!	#NULL!	#NULL!	#NULL!	#NULL!	#NULL!	#NULL!	#NULL!	#NULL!	#NULL!	#NULL!	#NULL!	#NULL!	#NULL!	#NULL!	#NULL!	#NULL!	#NULL!	#NULL!	#NULL!	#NULL!	#NULL!	#NULL!	#NULL!	1	4	#NULL!	#NULL!	#NULL!	#NULL!		2	2	2	2
2019-04-11 15:57:28	216	2019-04-11	good	#NULL!	#NULL!	#NULL!	#NULL!	1	#NULL!	1	#NULL!	#NULL!		0	#NULL!	#NULL!	#NULL!	#NULL!	#NULL!	#NULL!	#NULL!	#NULL!	#NULL!	#NULL!	#NULL!	#NULL!	#NULL!	#NULL!	#NULL!	#NULL!	#NULL!	#NULL!	#NULL!	#NULL!	#NULL!	#NULL!	#NULL!	#NULL!	1	3	#NULL!	#NULL!	#NULL!	#NULL!		2	2	2	2
2019-04-17 15:06:38	216	#NULL!	good	#NULL!	#NULL!	#NULL!	#NULL!	1	#NULL!	1	#NULL!	#NULL!		0	#NULL!	#NULL!	#NULL!	#NULL!	#NULL!	#NULL!	#NULL!	#NULL!	#NULL!	#NULL!	#NULL!	#NULL!	#NULL!	#NULL!	#NULL!	#NULL!	#NULL!	#NULL!	#NULL!	#NULL!	#NULL!	#NULL!	#NULL!	#NULL!	1	4	#NULL!	#NULL!	#NULL!	#NULL!		2	2	2	2
2019-04-24 09:58:49	216	2019-04-24	Good	#NULL!	#NULL!	#NULL!	#NULL!	1	#NULL!	1	#NULL!	#NULL!		1	2	2	2	2	1	1	2	1	1	1	1	1	2	2	2	2	4	4	1	1	2	2	2	2	1	3	#NULL!	#NULL!	#NULL!	#NULL!		2	2	2	2
2019-05-17 10:14:47	216	2019-05-17	Good	#NULL!	#NULL!	#NULL!	#NULL!	1	#NULL!	1	#NULL!	#NULL!		0	#NULL!	#NULL!	#NULL!	#NULL!	#NULL!	#NULL!	#NULL!	#NULL!	#NULL!	#NULL!	#NULL!	#NULL!	#NULL!	#NULL!	#NULL!	#NULL!	#NULL!	#NULL!	#NULL!	#NULL!	#NULL!	#NULL!	#NULL!	#NULL!	1	2	#NULL!	#NULL!	#NULL!	#NULL!		2	2	2	2
2019-06-17 12:22:54	216	2019-06-17	Good	#NULL!	#NULL!	#NULL!	#NULL!	1	#NULL!	1	#NULL!	#NULL!		0	#NULL!	#NULL!	#NULL!	#NULL!	#NULL!	#NULL!	#NULL!	#NULL!	#NULL!	#NULL!	#NULL!	#NULL!	#NULL!	#NULL!	#NULL!	#NULL!	#NULL!	#NULL!	#NULL!	#NULL!	#NULL!	#NULL!	#NULL!	#NULL!	1	1	#NULL!	#NULL!	#NULL!	#NULL!		1	1	1	1
2018-09-14 13:40:25	217	2018-09-14	very well	#NULL!	#NULL!	#NULL!	#NULL!	#NULL!	#NULL!	#NULL!	#NULL!	#NULL!		0	#NULL!	#NULL!	#NULL!	#NULL!	#NULL!	#NULL!	#NULL!	#NULL!	#NULL!	#NULL!	#NULL!	#NULL!	#NULL!	#NULL!	#NULL!	#NULL!	#NULL!	#NULL!	#NULL!	#NULL!	#NULL!	#NULL!	#NULL!	#NULL!	1	2	#NULL!	#NULL!	#NULL!	#NULL!		1	1	1	1
2018-09-21 12:17:16	217	2018-09-21	OK, doing alright	1	#NULL!	#NULL!	#NULL!	#NULL!	#NULL!	#NULL!	#NULL!	#NULL!		0	#NULL!	#NULL!	#NULL!	#NULL!	#NULL!	#NULL!	#NULL!	#NULL!	#NULL!	#NULL!	#NULL!	#NULL!	#NULL!	#NULL!	#NULL!	#NULL!	#NULL!	#NULL!	#NULL!	#NULL!	#NULL!	#NULL!	#NULL!	#NULL!	1	2	#NULL!	#NULL!	#NULL!	#NULL!		1	1	3	1
2018-09-28 10:25:35	217	2018-09-28	feeling okay	1	#NULL!	#NULL!	#NULL!	#NULL!	#NULL!	#NULL!	#NULL!	#NULL!		0	#NULL!	#NULL!	#NULL!	#NULL!	#NULL!	#NULL!	#NULL!	#NULL!	#NULL!	#NULL!	#NULL!	#NULL!	#NULL!	#NULL!	#NULL!	#NULL!	#NULL!	#NULL!	#NULL!	#NULL!	#NULL!	#NULL!	#NULL!	#NULL!	1	0	#NULL!	#NULL!	#NULL!	#NULL!		#NULL!	#NULL!	#NULL!	#NULL!
2018-11-20 10:22:33	217	2018-11-20	alright. upset because havent started radiation.	1	#NULL!	#NULL!	#NULL!	#NULL!	#NULL!	#NULL!	#NULL!	#NULL!		#NULL!	#NULL!	#NULL!	#NULL!	#NULL!	#NULL!	#NULL!	#NULL!	#NULL!	#NULL!	#NULL!	#NULL!	#NULL!	#NULL!	#NULL!	#NULL!	#NULL!	#NULL!	#NULL!	#NULL!	#NULL!	#NULL!	#NULL!	#NULL!	#NULL!	1	0	#NULL!	#NULL!	#NULL!	#NULL!		#NULL!	#NULL!	#NULL!	#NULL!
2018-08-28 12:52:08	218	2018-08-28	great real good!	#NULL!	#NULL!	#NULL!	#NULL!	#NULL!	#NULL!	#NULL!	#NULL!	#NULL!		1	1	1	1	1	1	1	1	1	1	1	1	1	2	1	2	2	5	5	1	1	1	1	1	1	1	2	#NULL!	#NULL!	#NULL!	#NULL!		1	1	1	1
2018-09-14 14:18:37	218	2018-09-14	great	#NULL!	#NULL!	#NULL!	#NULL!	#NULL!	#NULL!	#NULL!	#NULL!	#NULL!		0	#NULL!	#NULL!	#NULL!	#NULL!	#NULL!	#NULL!	#NULL!	#NULL!	#NULL!	#NULL!	#NULL!	#NULL!	#NULL!	#NULL!	#NULL!	#NULL!	#NULL!	#NULL!	#NULL!	#NULL!	#NULL!	#NULL!	#NULL!	#NULL!	1	0	#NULL!	#NULL!	#NULL!	#NULL!		#NULL!	#NULL!	#NULL!	#NULL!
2018-09-18 15:09:34	218	2018-09-18	Pretty good, left shooting pain in left nipple	1	#NULL!	#NULL!	#NULL!	#NULL!	#NULL!	#NULL!	#NULL!	#NULL!		0	#NULL!	#NULL!	#NULL!	#NULL!	#NULL!	#NULL!	#NULL!	#NULL!	#NULL!	#NULL!	#NULL!	#NULL!	#NULL!	#NULL!	#NULL!	#NULL!	#NULL!	#NULL!	#NULL!	#NULL!	#NULL!	#NULL!	#NULL!	#NULL!	2	7	#NULL!	#NULL!	#NULL!	#NULL!		1	1	1	1
2018-09-25 14:00:40	218	2018-09-25	GREAT!	1	#NULL!	#NULL!	#NULL!	#NULL!	#NULL!	#NULL!	#NULL!	#NULL!		0	#NULL!	#NULL!	#NULL!	#NULL!	#NULL!	#NULL!	#NULL!	#NULL!	#NULL!	#NULL!	#NULL!	#NULL!	#NULL!	#NULL!	#NULL!	#NULL!	#NULL!	#NULL!	#NULL!	#NULL!	#NULL!	#NULL!	#NULL!	#NULL!	1	0	#NULL!	#NULL!	#NULL!	#NULL!		#NULL!	#NULL!	#NULL!	#NULL!
2018-10-25 15:20:26	218	2018-10-25	GOOD	1	#NULL!	#NULL!	#NULL!	#NULL!	#NULL!	#NULL!	#NULL!	#NULL!		0	#NULL!	#NULL!	#NULL!	#NULL!	#NULL!	#NULL!	#NULL!	#NULL!	#NULL!	#NULL!	#NULL!	#NULL!	#NULL!	#NULL!	#NULL!	#NULL!	#NULL!	#NULL!	#NULL!	#NULL!	#NULL!	#NULL!	#NULL!	#NULL!	1	0	#NULL!	#NULL!	#NULL!	#NULL!		#NULL!	#NULL!	#NULL!	#NULL!
2018-09-14 14:30:49	219	2018-09-14	okay.	1	#NULL!	#NULL!	#NULL!	#NULL!	#NULL!	#NULL!	#NULL!	#NULL!		0	#NULL!	#NULL!	#NULL!	#NULL!	#NULL!	#NULL!	#NULL!	#NULL!	#NULL!	#NULL!	#NULL!	#NULL!	#NULL!	#NULL!	#NULL!	#NULL!	#NULL!	#NULL!	#NULL!	#NULL!	#NULL!	#NULL!	#NULL!	#NULL!	1	4	#NULL!	#NULL!	#NULL!	#NULL!		4	4	3	3
2018-09-18 11:29:28	219	2018-09-18	okay	1	#NULL!	#NULL!	#NULL!	#NULL!	#NULL!	#NULL!	#NULL!	#NULL!		0	#NULL!	#NULL!	#NULL!	#NULL!	#NULL!	#NULL!	#NULL!	#NULL!	#NULL!	#NULL!	#NULL!	#NULL!	#NULL!	#NULL!	#NULL!	#NULL!	#NULL!	#NULL!	#NULL!	#NULL!	#NULL!	#NULL!	#NULL!	#NULL!	1	3	#NULL!	#NULL!	#NULL!	#NULL!		3	3	3	4
2018-10-17 12:47:25	219	2018-10-17	rough	#NULL!	#NULL!	1	#NULL!	#NULL!	#NULL!	#NULL!	#NULL!	#NULL!		1	3	3	4	3	2	1	1	3	1	2	1	1	4	3	4	4	2	3	3	3	3	3	4	3	1	6	#NULL!	#NULL!	#NULL!	#NULL!		4	4	4	4
2018-09-14 14:47:59	220	2018-09-14	pretty good	1	#NULL!	#NULL!	#NULL!	#NULL!	#NULL!	#NULL!	#NULL!	#NULL!		0	#NULL!	#NULL!	#NULL!	#NULL!	#NULL!	#NULL!	#NULL!	#NULL!	#NULL!	#NULL!	#NULL!	#NULL!	#NULL!	#NULL!	#NULL!	#NULL!	#NULL!	#NULL!	#NULL!	#NULL!	#NULL!	#NULL!	#NULL!	#NULL!	1	0	#NULL!	#NULL!	#NULL!	#NULL!		#NULL!	#NULL!	#NULL!	#NULL!
2018-09-21 11:49:22	220	2018-09-21	feeling well overall	#NULL!	#NULL!	#NULL!	1	#NULL!	#NULL!	#NULL!	#NULL!	#NULL!		0	#NULL!	#NULL!	#NULL!	#NULL!	#NULL!	#NULL!	#NULL!	#NULL!	#NULL!	#NULL!	#NULL!	#NULL!	#NULL!	#NULL!	#NULL!	#NULL!	#NULL!	#NULL!	#NULL!	#NULL!	#NULL!	#NULL!	#NULL!	#NULL!	1	0	#NULL!	#NULL!	#NULL!	#NULL!		#NULL!	#NULL!	#NULL!	#NULL!
2018-09-25 14:53:01	220	2018-09-25	okay	#NULL!	#NULL!	#NULL!	1	#NULL!	#NULL!	#NULL!	#NULL!	#NULL!		0	#NULL!	#NULL!	#NULL!	#NULL!	#NULL!	#NULL!	#NULL!	#NULL!	#NULL!	#NULL!	#NULL!	#NULL!	#NULL!	#NULL!	#NULL!	#NULL!	#NULL!	#NULL!	#NULL!	#NULL!	#NULL!	#NULL!	#NULL!	#NULL!	1	0	#NULL!	#NULL!	#NULL!	#NULL!		#NULL!	#NULL!	#NULL!	#NULL!
2018-10-09 12:13:38	220	2018-10-09	feelin okay. busy.	#NULL!	#NULL!	#NULL!	1	#NULL!	#NULL!	#NULL!	#NULL!	#NULL!		1	5	2	5	3	1	1	1	1	1	1	1	1	3	1	2	2	4	3	1	1	1	1	1	1	1	3	#NULL!	#NULL!	#NULL!	#NULL!		1	1	1	1
2018-10-18 16:15:52	220	2018-10-18	pretty good. a little tired	#NULL!	#NULL!	#NULL!	1	#NULL!	#NULL!	#NULL!	#NULL!	#NULL!		0	#NULL!	#NULL!	#NULL!	#NULL!	#NULL!	#NULL!	#NULL!	#NULL!	#NULL!	#NULL!	#NULL!	#NULL!	#NULL!	#NULL!	#NULL!	#NULL!	#NULL!	#NULL!	#NULL!	#NULL!	#NULL!	#NULL!	#NULL!	#NULL!	1	0	#NULL!	#NULL!	#NULL!	#NULL!		#NULL!	#NULL!	#NULL!	#NULL!
2018-12-19 09:58:05	220	2018-12-19	sore breast	#NULL!	#NULL!	#NULL!	1	#NULL!	#NULL!	#NULL!	#NULL!	#NULL!		#NULL!	#NULL!	#NULL!	#NULL!	#NULL!	#NULL!	#NULL!	#NULL!	#NULL!	#NULL!	#NULL!	#NULL!	#NULL!	#NULL!	#NULL!	#NULL!	#NULL!	#NULL!	#NULL!	#NULL!	#NULL!	#NULL!	#NULL!	#NULL!	#NULL!	1	4	#NULL!	#NULL!	#NULL!	#NULL!		1	1	1	1
2019-01-22 10:52:30	220	2019-01-22	ok, but need thyroidectomy	#NULL!	#NULL!	#NULL!	1	#NULL!	#NULL!	#NULL!	#NULL!	#NULL!		#NULL!	#NULL!	#NULL!	#NULL!	#NULL!	#NULL!	#NULL!	#NULL!	#NULL!	#NULL!	#NULL!	#NULL!	#NULL!	#NULL!	#NULL!	#NULL!	#NULL!	#NULL!	#NULL!	#NULL!	#NULL!	#NULL!	#NULL!	#NULL!	#NULL!	1	0	#NULL!	#NULL!	#NULL!	#NULL!		#NULL!	#NULL!	#NULL!	#NULL!
2019-01-29 11:14:59	220	2019-01-29	ok	#NULL!	#NULL!	#NULL!	1	#NULL!	#NULL!	#NULL!	#NULL!	#NULL!		#NULL!	#NULL!	#NULL!	#NULL!	#NULL!	#NULL!	#NULL!	#NULL!	#NULL!	#NULL!	#NULL!	#NULL!	#NULL!	#NULL!	#NULL!	#NULL!	#NULL!	#NULL!	#NULL!	#NULL!	#NULL!	#NULL!	#NULL!	#NULL!	#NULL!	1	0	#NULL!	#NULL!	#NULL!	#NULL!		#NULL!	#NULL!	#NULL!	#NULL!
2019-02-18 16:11:20	220	2019-02-18	pneumonia last week. discharged last week.	#NULL!	#NULL!	#NULL!	1	#NULL!	#NULL!	#NULL!	#NULL!	#NULL!		#NULL!	#NULL!	#NULL!	#NULL!	#NULL!	#NULL!	#NULL!	#NULL!	#NULL!	#NULL!	#NULL!	#NULL!	#NULL!	#NULL!	#NULL!	#NULL!	#NULL!	#NULL!	#NULL!	#NULL!	#NULL!	#NULL!	#NULL!	#NULL!	#NULL!	1	3	#NULL!	#NULL!	#NULL!	#NULL!		1	1	1	1
2019-02-25 14:01:35	220	2019-02-25	have a cold. not feeling great	#NULL!	#NULL!	#NULL!	1	#NULL!	#NULL!	#NULL!	#NULL!	#NULL!		0	#NULL!	#NULL!	#NULL!	#NULL!	#NULL!	#NULL!	#NULL!	#NULL!	#NULL!	#NULL!	#NULL!	#NULL!	#NULL!	#NULL!	#NULL!	#NULL!	#NULL!	#NULL!	#NULL!	#NULL!	#NULL!	#NULL!	#NULL!	#NULL!	1	6	#NULL!	#NULL!	#NULL!	#NULL!		2	1	1	1
2018-08-30 17:31:42	221	2018-08-30	Good	#NULL!	#NULL!	#NULL!	#NULL!	#NULL!	#NULL!	#NULL!	#NULL!	#NULL!		0	#NULL!	#NULL!	#NULL!	#NULL!	#NULL!	#NULL!	#NULL!	#NULL!	#NULL!	#NULL!	#NULL!	#NULL!	#NULL!	#NULL!	#NULL!	#NULL!	#NULL!	#NULL!	#NULL!	#NULL!	#NULL!	#NULL!	#NULL!	#NULL!	1	0	#NULL!	#NULL!	#NULL!	#NULL!		#NULL!	#NULL!	#NULL!	#NULL!
2018-09-10 09:42:27	221	2018-09-10	Good	#NULL!	#NULL!	#NULL!	#NULL!	#NULL!	#NULL!	#NULL!	#NULL!	#NULL!		0	#NULL!	#NULL!	#NULL!	#NULL!	#NULL!	#NULL!	#NULL!	#NULL!	#NULL!	#NULL!	#NULL!	#NULL!	#NULL!	#NULL!	#NULL!	#NULL!	#NULL!	#NULL!	#NULL!	#NULL!	#NULL!	#NULL!	#NULL!	#NULL!	1	0	#NULL!	#NULL!	#NULL!	#NULL!		#NULL!	#NULL!	#NULL!	#NULL!
2018-09-17 19:04:59	221	2018-09-17	Fine	1	#NULL!	#NULL!	#NULL!	#NULL!	#NULL!	#NULL!	#NULL!	#NULL!		0	#NULL!	#NULL!	#NULL!	#NULL!	#NULL!	#NULL!	#NULL!	#NULL!	#NULL!	#NULL!	#NULL!	#NULL!	#NULL!	#NULL!	#NULL!	#NULL!	#NULL!	#NULL!	#NULL!	#NULL!	#NULL!	#NULL!	#NULL!	#NULL!	1	0	#NULL!	#NULL!	#NULL!	#NULL!		#NULL!	#NULL!	#NULL!	#NULL!
2018-09-27 20:23:14	221	2018-09-27	Ok	1	#NULL!	#NULL!	#NULL!	#NULL!	#NULL!	#NULL!	#NULL!	#NULL!		0	#NULL!	#NULL!	#NULL!	#NULL!	#NULL!	#NULL!	#NULL!	#NULL!	#NULL!	#NULL!	#NULL!	#NULL!	#NULL!	#NULL!	#NULL!	#NULL!	#NULL!	#NULL!	#NULL!	#NULL!	#NULL!	#NULL!	#NULL!	#NULL!	1	0	#NULL!	#NULL!	#NULL!	#NULL!		#NULL!	#NULL!	#NULL!	#NULL!
2018-10-08 21:26:22	221	2018-10-08	Ok	1	#NULL!	#NULL!	#NULL!	#NULL!	#NULL!	#NULL!	#NULL!	#NULL!		0	#NULL!	#NULL!	#NULL!	#NULL!	#NULL!	#NULL!	#NULL!	#NULL!	#NULL!	#NULL!	#NULL!	#NULL!	#NULL!	#NULL!	#NULL!	#NULL!	#NULL!	#NULL!	#NULL!	#NULL!	#NULL!	#NULL!	#NULL!	#NULL!	1	0	#NULL!	#NULL!	#NULL!	#NULL!		#NULL!	#NULL!	#NULL!	#NULL!
2018-11-13 20:27:17	221	2018-11-13	Ok	#NULL!	#NULL!	#NULL!	1	#NULL!	#NULL!	#NULL!	#NULL!	#NULL!		#NULL!	#NULL!	#NULL!	#NULL!	#NULL!	#NULL!	#NULL!	#NULL!	#NULL!	#NULL!	#NULL!	#NULL!	#NULL!	#NULL!	#NULL!	#NULL!	#NULL!	#NULL!	#NULL!	#NULL!	#NULL!	#NULL!	#NULL!	#NULL!	#NULL!	1	0	#NULL!	#NULL!	#NULL!	#NULL!		#NULL!	#NULL!	#NULL!	#NULL!
2018-11-22 23:45:17	221	2018-11-22	Ok	#NULL!	#NULL!	#NULL!	1	#NULL!	#NULL!	#NULL!	#NULL!	#NULL!		#NULL!	#NULL!	#NULL!	#NULL!	#NULL!	#NULL!	#NULL!	#NULL!	#NULL!	#NULL!	#NULL!	#NULL!	#NULL!	#NULL!	#NULL!	#NULL!	#NULL!	#NULL!	#NULL!	#NULL!	#NULL!	#NULL!	#NULL!	#NULL!	#NULL!	1	0	#NULL!	#NULL!	#NULL!	#NULL!		#NULL!	#NULL!	#NULL!	#NULL!
2018-08-30 12:49:51	222	2018-08-30	Good, feeling a bit stronger each day.	#NULL!	#NULL!	#NULL!	#NULL!	#NULL!	#NULL!	#NULL!	#NULL!	#NULL!		1	3	1	2	2	1	1	1	1	1	1	1	1	2	2	3	2	4	3	2	1	3	1	3	1	1	1	#NULL!	#NULL!	#NULL!	#NULL!		2	2	1	3
2018-09-20 04:53:19	222	2018-09-20	Very well	1	#NULL!	#NULL!	#NULL!	#NULL!	#NULL!	#NULL!	#NULL!	#NULL!		0	#NULL!	#NULL!	#NULL!	#NULL!	#NULL!	#NULL!	#NULL!	#NULL!	#NULL!	#NULL!	#NULL!	#NULL!	#NULL!	#NULL!	#NULL!	#NULL!	#NULL!	#NULL!	#NULL!	#NULL!	#NULL!	#NULL!	#NULL!	#NULL!	1	0	#NULL!	#NULL!	#NULL!	#NULL!		#NULL!	#NULL!	#NULL!	#NULL!
2018-09-25 15:47:21	222	2018-09-25	Very well	1	#NULL!	#NULL!	#NULL!	#NULL!	#NULL!	#NULL!	#NULL!	#NULL!		0	#NULL!	#NULL!	#NULL!	#NULL!	#NULL!	#NULL!	#NULL!	#NULL!	#NULL!	#NULL!	#NULL!	#NULL!	#NULL!	#NULL!	#NULL!	#NULL!	#NULL!	#NULL!	#NULL!	#NULL!	#NULL!	#NULL!	#NULL!	#NULL!	1	0	#NULL!	#NULL!	#NULL!	#NULL!		#NULL!	#NULL!	#NULL!	#NULL!
2018-11-05 14:38:21	222	2018-11-05	Slightly fatigued, but feeling alright.	1	#NULL!	#NULL!	#NULL!	#NULL!	#NULL!	#NULL!	#NULL!	#NULL!		0	#NULL!	#NULL!	#NULL!	#NULL!	#NULL!	#NULL!	#NULL!	#NULL!	#NULL!	#NULL!	#NULL!	#NULL!	#NULL!	#NULL!	#NULL!	#NULL!	#NULL!	#NULL!	#NULL!	#NULL!	#NULL!	#NULL!	#NULL!	#NULL!	1	2	#NULL!	#NULL!	#NULL!	#NULL!		1	1	1	1
2018-09-14 15:01:23	223	2018-09-14	okay	#NULL!	#NULL!	#NULL!	#NULL!	#NULL!	#NULL!	#NULL!	#NULL!	#NULL!		0	#NULL!	#NULL!	#NULL!	#NULL!	#NULL!	#NULL!	#NULL!	#NULL!	#NULL!	#NULL!	#NULL!	#NULL!	#NULL!	#NULL!	#NULL!	#NULL!	#NULL!	#NULL!	#NULL!	#NULL!	#NULL!	#NULL!	#NULL!	#NULL!	2	7	#NULL!	#NULL!	#NULL!	#NULL!		4	5	4	5
2018-09-21 13:40:21	223	2018-09-21	Sore- breast reduction/reconstruction. on tuesday	#NULL!	#NULL!	1	#NULL!	#NULL!	#NULL!	#NULL!	#NULL!	#NULL!		1	5	4	5	4	2	3	2	2	1	1	1	1	4	3	5	4	2	2	4	4	5	5	5	5	2	7	#NULL!	#NULL!	#NULL!	#NULL!		5	5	5	5
2018-10-10 12:13:49	223	2018-10-10	Ended up sick with the cold-	#NULL!	#NULL!	1	#NULL!	#NULL!	#NULL!	#NULL!	#NULL!	#NULL!		0	#NULL!	#NULL!	#NULL!	#NULL!	#NULL!	#NULL!	#NULL!	#NULL!	#NULL!	#NULL!	#NULL!	#NULL!	#NULL!	#NULL!	#NULL!	#NULL!	#NULL!	#NULL!	#NULL!	#NULL!	#NULL!	#NULL!	#NULL!	#NULL!	2	8	#NULL!	#NULL!	#NULL!	#NULL!		5	5	4	5
2018-10-17 11:02:23	223	2018-10-17	back has been hurting, developed rash on breast	#NULL!	#NULL!	1	#NULL!	#NULL!	#NULL!	#NULL!	#NULL!	#NULL!		0	#NULL!	#NULL!	#NULL!	#NULL!	#NULL!	#NULL!	#NULL!	#NULL!	#NULL!	#NULL!	#NULL!	#NULL!	#NULL!	#NULL!	#NULL!	#NULL!	#NULL!	#NULL!	#NULL!	#NULL!	#NULL!	#NULL!	#NULL!	#NULL!	3	9	#NULL!	#NULL!	#NULL!	#NULL!		4	4	4	4
2018-11-15 15:07:15	223	2018-11-15	TIRED. getting stronger.	#NULL!	#NULL!	1	#NULL!	#NULL!	#NULL!	#NULL!	#NULL!	#NULL!		0	#NULL!	#NULL!	#NULL!	#NULL!	#NULL!	#NULL!	#NULL!	#NULL!	#NULL!	#NULL!	#NULL!	#NULL!	#NULL!	#NULL!	#NULL!	#NULL!	#NULL!	#NULL!	#NULL!	#NULL!	#NULL!	#NULL!	#NULL!	#NULL!	2	7	#NULL!	#NULL!	#NULL!	#NULL!		4	4	2	4
2018-09-12 12:47:07	224	2018-09-12	Little sore and a little tender everywhere	1	#NULL!	#NULL!	#NULL!	#NULL!	#NULL!	#NULL!	#NULL!	#NULL!		1	5	4	5	5	1	1	1	1	1	4	1	1	5	5	2	5	2	3	3	1	5	4	5	4	3	10	#NULL!	#NULL!	#NULL!	#NULL!		5	5	5	5
2018-09-19 11:04:22	224	2018-09-19	very good	1	#NULL!	#NULL!	#NULL!	#NULL!	#NULL!	#NULL!	#NULL!	#NULL!		0	#NULL!	#NULL!	#NULL!	#NULL!	#NULL!	#NULL!	#NULL!	#NULL!	#NULL!	#NULL!	#NULL!	#NULL!	#NULL!	#NULL!	#NULL!	#NULL!	#NULL!	#NULL!	#NULL!	#NULL!	#NULL!	#NULL!	#NULL!	#NULL!	1	0	#NULL!	#NULL!	#NULL!	#NULL!		#NULL!	#NULL!	#NULL!	#NULL!
2018-09-25 15:58:33	224	2018-09-25	Very good	1	#NULL!	#NULL!	#NULL!	#NULL!	#NULL!	#NULL!	#NULL!	#NULL!		0	#NULL!	#NULL!	#NULL!	#NULL!	#NULL!	#NULL!	#NULL!	#NULL!	#NULL!	#NULL!	#NULL!	#NULL!	#NULL!	#NULL!	#NULL!	#NULL!	#NULL!	#NULL!	#NULL!	#NULL!	#NULL!	#NULL!	#NULL!	#NULL!	1	0	#NULL!	#NULL!	#NULL!	#NULL!		#NULL!	#NULL!	#NULL!	#NULL!
2018-09-28 15:09:32	224	2018-09-28		1	#NULL!	#NULL!	#NULL!	#NULL!	#NULL!	#NULL!	#NULL!	#NULL!		0	#NULL!	#NULL!	#NULL!	#NULL!	#NULL!	#NULL!	#NULL!	#NULL!	#NULL!	#NULL!	#NULL!	#NULL!	#NULL!	#NULL!	#NULL!	#NULL!	#NULL!	#NULL!	#NULL!	#NULL!	#NULL!	#NULL!	#NULL!	#NULL!	2	7	#NULL!	#NULL!	#NULL!	#NULL!		3	3	4	3
2018-10-16 10:30:07	224	2018-10-10	A little fatigued, a bit tired--out of town, played out from long weekend.	#NULL!	#NULL!	#NULL!	#NULL!	#NULL!	#NULL!	#NULL!	#NULL!	#NULL!		0	5	3	5	5	1	1	1	1	1	1	1	1	3	3	3	3	3	3	3	3	4	1	3	3	1	3	#NULL!	#NULL!	#NULL!	#NULL!		2	2	1	2
2018-11-09 10:21:48	224	2018-11-09	tired, worn out	1	#NULL!	#NULL!	#NULL!	#NULL!	#NULL!	#NULL!	#NULL!	#NULL!		#NULL!	#NULL!	#NULL!	#NULL!	#NULL!	#NULL!	#NULL!	#NULL!	#NULL!	#NULL!	#NULL!	#NULL!	#NULL!	#NULL!	#NULL!	#NULL!	#NULL!	#NULL!	#NULL!	#NULL!	#NULL!	#NULL!	#NULL!	#NULL!	#NULL!	2	8	#NULL!	#NULL!	#NULL!	#NULL!		2	2	1	2
2019-01-22 11:10:12	224	2019-01-22	frustrated because not bouncing back as fast as I thought I should	1	#NULL!	#NULL!	#NULL!	#NULL!	#NULL!	#NULL!	#NULL!	#NULL!		#NULL!	#NULL!	#NULL!	#NULL!	#NULL!	#NULL!	#NULL!	#NULL!	#NULL!	#NULL!	#NULL!	#NULL!	#NULL!	#NULL!	#NULL!	#NULL!	#NULL!	#NULL!	#NULL!	#NULL!	#NULL!	#NULL!	#NULL!	#NULL!	#NULL!	1	4	#NULL!	#NULL!	#NULL!	#NULL!		1	1	1	1
2019-01-29 11:20:51	224	2019-01-29	better today	1	#NULL!	#NULL!	#NULL!	#NULL!	#NULL!	#NULL!	#NULL!	#NULL!		#NULL!	#NULL!	#NULL!	#NULL!	#NULL!	#NULL!	#NULL!	#NULL!	#NULL!	#NULL!	#NULL!	#NULL!	#NULL!	#NULL!	#NULL!	#NULL!	#NULL!	#NULL!	#NULL!	#NULL!	#NULL!	#NULL!	#NULL!	#NULL!	#NULL!	2	8	#NULL!	#NULL!	#NULL!	#NULL!		3	3	3	3
2018-09-13 13:13:04	225	2018-09-13	great	#NULL!	#NULL!	#NULL!	#NULL!	#NULL!	#NULL!	#NULL!	#NULL!	#NULL!		0	#NULL!	#NULL!	#NULL!	#NULL!	#NULL!	#NULL!	#NULL!	#NULL!	#NULL!	#NULL!	#NULL!	#NULL!	#NULL!	#NULL!	#NULL!	#NULL!	#NULL!	#NULL!	#NULL!	#NULL!	#NULL!	#NULL!	#NULL!	#NULL!	1	0	#NULL!	#NULL!	#NULL!	#NULL!		#NULL!	#NULL!	#NULL!	#NULL!
2018-09-17 12:59:42	225	2018-09-17	Great	1	#NULL!	#NULL!	#NULL!	#NULL!	#NULL!	#NULL!	#NULL!	#NULL!		0	#NULL!	#NULL!	#NULL!	#NULL!	#NULL!	#NULL!	#NULL!	#NULL!	#NULL!	#NULL!	#NULL!	#NULL!	#NULL!	#NULL!	#NULL!	#NULL!	#NULL!	#NULL!	#NULL!	#NULL!	#NULL!	#NULL!	#NULL!	#NULL!	1	0	#NULL!	#NULL!	#NULL!	#NULL!		#NULL!	#NULL!	#NULL!	#NULL!
2018-10-08 08:08:59	225	2018-10-08	Tired after last weeks surgery	1	#NULL!	#NULL!	#NULL!	#NULL!	#NULL!	#NULL!	#NULL!	#NULL!		0	#NULL!	#NULL!	#NULL!	#NULL!	#NULL!	#NULL!	#NULL!	#NULL!	#NULL!	#NULL!	#NULL!	#NULL!	#NULL!	#NULL!	#NULL!	#NULL!	#NULL!	#NULL!	#NULL!	#NULL!	#NULL!	#NULL!	#NULL!	#NULL!	1	1	#NULL!	#NULL!	#NULL!	#NULL!		1	1	1	1
2018-10-15 12:32:43	225	2018-10-15	Excellent	1	#NULL!	#NULL!	#NULL!	#NULL!	#NULL!	#NULL!	#NULL!	#NULL!		1	3	1	1	3	1	1	1	1	1	1	1	1	1	1	1	1	4	4	1	1	4	4	3	2	1	0	#NULL!	#NULL!	#NULL!	#NULL!		#NULL!	#NULL!	#NULL!	#NULL!
2018-10-16 10:30:08	225	2018-10-10	Pretty good--no nausea	#NULL!	#NULL!	#NULL!	#NULL!	#NULL!	#NULL!	#NULL!	#NULL!	#NULL!		0	5	1	1	5	1	1	1	1	1	1	1	1	2	1	1	1	3	5	3	1	5	1	3	3	1	0	#NULL!	#NULL!	#NULL!	#NULL!		1	1	1	1
2018-10-23 15:06:13	225	2018-10-23	Very good	1	#NULL!	#NULL!	#NULL!	#NULL!	#NULL!	#NULL!	#NULL!	#NULL!		1	5	1	1	1	1	1	1	1	1	1	1	1	1	1	1	1	4	5	1	1	1	2	2	2	1	0	#NULL!	#NULL!	#NULL!	#NULL!		#NULL!	#NULL!	#NULL!	#NULL!
2018-10-24 21:47:10	226	2018-11-17	Normal	#NULL!	#NULL!	#NULL!	#NULL!	#NULL!	#NULL!	#NULL!	#NULL!	#NULL!		0	#NULL!	#NULL!	#NULL!	#NULL!	#NULL!	#NULL!	#NULL!	#NULL!	#NULL!	#NULL!	#NULL!	#NULL!	#NULL!	#NULL!	#NULL!	#NULL!	#NULL!	#NULL!	#NULL!	#NULL!	#NULL!	#NULL!	#NULL!	#NULL!	1	1	#NULL!	#NULL!	#NULL!	#NULL!		1	1	1	1
2018-10-25 15:45:05	226	2018-10-25	Good	1	#NULL!	#NULL!	#NULL!	#NULL!	#NULL!	#NULL!	#NULL!	#NULL!		0	#NULL!	#NULL!	#NULL!	#NULL!	#NULL!	#NULL!	#NULL!	#NULL!	#NULL!	#NULL!	#NULL!	#NULL!	#NULL!	#NULL!	#NULL!	#NULL!	#NULL!	#NULL!	#NULL!	#NULL!	#NULL!	#NULL!	#NULL!	#NULL!	1	1	#NULL!	#NULL!	#NULL!	#NULL!		1	1	1	1
2018-11-13 06:04:52	226	#NULL!	Good	1	#NULL!	#NULL!	#NULL!	#NULL!	#NULL!	#NULL!	#NULL!	#NULL!		#NULL!	#NULL!	#NULL!	#NULL!	#NULL!	#NULL!	#NULL!	#NULL!	#NULL!	#NULL!	#NULL!	#NULL!	#NULL!	#NULL!	#NULL!	#NULL!	#NULL!	#NULL!	#NULL!	#NULL!	#NULL!	#NULL!	#NULL!	#NULL!	#NULL!	1	1	#NULL!	#NULL!	#NULL!	#NULL!		2	2	2	2
2018-11-20 06:05:49	226	2018-11-20		#NULL!	#NULL!	#NULL!	#NULL!	#NULL!	#NULL!	#NULL!	#NULL!	#NULL!		#NULL!	#NULL!	#NULL!	#NULL!	#NULL!	#NULL!	#NULL!	#NULL!	#NULL!	#NULL!	#NULL!	#NULL!	#NULL!	#NULL!	#NULL!	#NULL!	#NULL!	#NULL!	#NULL!	#NULL!	#NULL!	#NULL!	#NULL!	#NULL!	#NULL!	#NULL!	#NULL!	#NULL!	#NULL!	#NULL!	#NULL!		#NULL!	#NULL!	#NULL!	#NULL!
2018-11-28 13:43:16	226	#NULL!	Good	1	#NULL!	#NULL!	#NULL!	#NULL!	#NULL!	#NULL!	#NULL!	#NULL!		#NULL!	#NULL!	#NULL!	#NULL!	#NULL!	#NULL!	#NULL!	#NULL!	#NULL!	#NULL!	#NULL!	#NULL!	#NULL!	#NULL!	#NULL!	#NULL!	#NULL!	#NULL!	#NULL!	#NULL!	#NULL!	#NULL!	#NULL!	#NULL!	#NULL!	1	2	#NULL!	#NULL!	#NULL!	#NULL!		2	2	2	2
2018-12-05 13:43:49	226	2018-12-05		#NULL!	#NULL!	#NULL!	#NULL!	#NULL!	#NULL!	#NULL!	#NULL!	#NULL!		#NULL!	#NULL!	#NULL!	#NULL!	#NULL!	#NULL!	#NULL!	#NULL!	#NULL!	#NULL!	#NULL!	#NULL!	#NULL!	#NULL!	#NULL!	#NULL!	#NULL!	#NULL!	#NULL!	#NULL!	#NULL!	#NULL!	#NULL!	#NULL!	#NULL!	#NULL!	#NULL!	#NULL!	#NULL!	#NULL!	#NULL!		#NULL!	#NULL!	#NULL!	#NULL!
2019-01-30 11:31:29	226	#NULL!	Good	#NULL!	#NULL!	1	#NULL!	#NULL!	#NULL!	#NULL!	#NULL!	#NULL!		0	#NULL!	#NULL!	#NULL!	#NULL!	#NULL!	#NULL!	#NULL!	#NULL!	#NULL!	#NULL!	#NULL!	#NULL!	#NULL!	#NULL!	#NULL!	#NULL!	#NULL!	#NULL!	#NULL!	#NULL!	#NULL!	#NULL!	#NULL!	#NULL!	1	1	#NULL!	#NULL!	#NULL!	#NULL!		2	2	2	2
2019-02-06 11:31:51	226	2019-02-06		#NULL!	#NULL!	#NULL!	#NULL!	#NULL!	#NULL!	#NULL!	#NULL!	#NULL!		#NULL!	#NULL!	#NULL!	#NULL!	#NULL!	#NULL!	#NULL!	#NULL!	#NULL!	#NULL!	#NULL!	#NULL!	#NULL!	#NULL!	#NULL!	#NULL!	#NULL!	#NULL!	#NULL!	#NULL!	#NULL!	#NULL!	#NULL!	#NULL!	#NULL!	#NULL!	#NULL!	#NULL!	#NULL!	#NULL!	#NULL!		#NULL!	#NULL!	#NULL!	#NULL!
2019-02-12 15:01:40	226	2019-02-12	Good	#NULL!	#NULL!	1	#NULL!	#NULL!	#NULL!	#NULL!	#NULL!	#NULL!		0	#NULL!	#NULL!	#NULL!	#NULL!	#NULL!	#NULL!	#NULL!	#NULL!	#NULL!	#NULL!	#NULL!	#NULL!	#NULL!	#NULL!	#NULL!	#NULL!	#NULL!	#NULL!	#NULL!	#NULL!	#NULL!	#NULL!	#NULL!	#NULL!	1	1	#NULL!	#NULL!	#NULL!	#NULL!		2	2	2	2
2019-02-19 19:52:22	226	2019-02-19	Good	#NULL!	#NULL!	1	#NULL!	#NULL!	#NULL!	#NULL!	#NULL!	#NULL!		0	#NULL!	#NULL!	#NULL!	#NULL!	#NULL!	#NULL!	#NULL!	#NULL!	#NULL!	#NULL!	#NULL!	#NULL!	#NULL!	#NULL!	#NULL!	#NULL!	#NULL!	#NULL!	#NULL!	#NULL!	#NULL!	#NULL!	#NULL!	#NULL!	1	1	#NULL!	#NULL!	#NULL!	#NULL!		2	2	2	2
2019-02-26 13:38:55	226	2019-02-26	Good	#NULL!	#NULL!	1	#NULL!	#NULL!	#NULL!	#NULL!	#NULL!	#NULL!		0	#NULL!	#NULL!	#NULL!	#NULL!	#NULL!	#NULL!	#NULL!	#NULL!	#NULL!	#NULL!	#NULL!	#NULL!	#NULL!	#NULL!	#NULL!	#NULL!	#NULL!	#NULL!	#NULL!	#NULL!	#NULL!	#NULL!	#NULL!	#NULL!	1	1	#NULL!	#NULL!	#NULL!	#NULL!		2	2	2	2
2019-03-11 16:26:43	226	2019-03-11	Good	#NULL!	#NULL!	#NULL!	#NULL!	#NULL!	1	1	#NULL!	#NULL!		0	#NULL!	#NULL!	#NULL!	#NULL!	#NULL!	#NULL!	#NULL!	#NULL!	#NULL!	#NULL!	#NULL!	#NULL!	#NULL!	#NULL!	#NULL!	#NULL!	#NULL!	#NULL!	#NULL!	#NULL!	#NULL!	#NULL!	#NULL!	#NULL!	1	1	#NULL!	#NULL!	#NULL!	#NULL!		2	2	1	2
2019-03-20 13:14:31	226	#NULL!	Good	#NULL!	#NULL!	#NULL!	#NULL!	#NULL!	1	1	#NULL!	#NULL!		0	#NULL!	#NULL!	#NULL!	#NULL!	#NULL!	#NULL!	#NULL!	#NULL!	#NULL!	#NULL!	#NULL!	#NULL!	#NULL!	#NULL!	#NULL!	#NULL!	#NULL!	#NULL!	#NULL!	#NULL!	#NULL!	#NULL!	#NULL!	#NULL!	1	1	#NULL!	#NULL!	#NULL!	#NULL!		2	2	2	2
2019-04-02 11:35:21	226	#NULL!	Good	#NULL!	#NULL!	#NULL!	#NULL!	#NULL!	1	1	#NULL!	#NULL!		0	#NULL!	#NULL!	#NULL!	#NULL!	#NULL!	#NULL!	#NULL!	#NULL!	#NULL!	#NULL!	#NULL!	#NULL!	#NULL!	#NULL!	#NULL!	#NULL!	#NULL!	#NULL!	#NULL!	#NULL!	#NULL!	#NULL!	#NULL!	#NULL!	1	1	#NULL!	#NULL!	#NULL!	#NULL!		2	2	1	2
2019-04-12 06:52:31	226	2019-04-12	Good	1	#NULL!	#NULL!	#NULL!	#NULL!	#NULL!	#NULL!	#NULL!	#NULL!		0	#NULL!	#NULL!	#NULL!	#NULL!	#NULL!	#NULL!	#NULL!	#NULL!	#NULL!	#NULL!	#NULL!	#NULL!	#NULL!	#NULL!	#NULL!	#NULL!	#NULL!	#NULL!	#NULL!	#NULL!	#NULL!	#NULL!	#NULL!	#NULL!	1	1	#NULL!	#NULL!	#NULL!	#NULL!		2	2	1	2
2019-04-17 17:27:23	226	#NULL!	Good	1	#NULL!	#NULL!	#NULL!	#NULL!	#NULL!	#NULL!	#NULL!	#NULL!		0	#NULL!	#NULL!	#NULL!	#NULL!	#NULL!	#NULL!	#NULL!	#NULL!	#NULL!	#NULL!	#NULL!	#NULL!	#NULL!	#NULL!	#NULL!	#NULL!	#NULL!	#NULL!	#NULL!	#NULL!	#NULL!	#NULL!	#NULL!	#NULL!	1	1	#NULL!	#NULL!	#NULL!	#NULL!		2	2	2	2
2019-04-26 13:00:05	226	#NULL!	Good	1	#NULL!	#NULL!	#NULL!	#NULL!	#NULL!	#NULL!	#NULL!	#NULL!		0	#NULL!	#NULL!	#NULL!	#NULL!	#NULL!	#NULL!	#NULL!	#NULL!	#NULL!	#NULL!	#NULL!	#NULL!	#NULL!	#NULL!	#NULL!	#NULL!	#NULL!	#NULL!	#NULL!	#NULL!	#NULL!	#NULL!	#NULL!	#NULL!	1	1	#NULL!	#NULL!	#NULL!	#NULL!		2	2	1	2
2019-05-15 15:18:27	226	2019-05-15	Good	1	#NULL!	#NULL!	#NULL!	#NULL!	#NULL!	#NULL!	#NULL!	#NULL!		0	#NULL!	#NULL!	#NULL!	#NULL!	#NULL!	#NULL!	#NULL!	#NULL!	#NULL!	#NULL!	#NULL!	#NULL!	#NULL!	#NULL!	#NULL!	#NULL!	#NULL!	#NULL!	#NULL!	#NULL!	#NULL!	#NULL!	#NULL!	#NULL!	1	1	#NULL!	#NULL!	#NULL!	#NULL!		2	2	1	2
2019-06-19 12:43:59	226	#NULL!	Good	1	#NULL!	#NULL!	#NULL!	#NULL!	#NULL!	#NULL!	#NULL!	#NULL!		0	#NULL!	#NULL!	#NULL!	#NULL!	#NULL!	#NULL!	#NULL!	#NULL!	#NULL!	#NULL!	#NULL!	#NULL!	#NULL!	#NULL!	#NULL!	#NULL!	#NULL!	#NULL!	#NULL!	#NULL!	#NULL!	#NULL!	#NULL!	#NULL!	1	1	#NULL!	#NULL!	#NULL!	#NULL!		2	2	1	2
2018-09-14 13:54:30	227	2018-09-14	pretty good	#NULL!	#NULL!	#NULL!	#NULL!	#NULL!	#NULL!	#NULL!	#NULL!	#NULL!		0	#NULL!	#NULL!	#NULL!	#NULL!	#NULL!	#NULL!	#NULL!	#NULL!	#NULL!	#NULL!	#NULL!	#NULL!	#NULL!	#NULL!	#NULL!	#NULL!	#NULL!	#NULL!	#NULL!	#NULL!	#NULL!	#NULL!	#NULL!	#NULL!	1	2	#NULL!	#NULL!	#NULL!	#NULL!		1	2	1	2
2018-09-19 11:31:21	227	2018-09-19	pretty good, a little rough	1	#NULL!	#NULL!	#NULL!	#NULL!	#NULL!	#NULL!	#NULL!	#NULL!		1	5	4	5	3	1	1	3	3	1	1	1	1	2	1	2	2	3	2	3	4	1	2	3	2	1	5	#NULL!	#NULL!	#NULL!	#NULL!		2	3	2	4
2018-09-25 10:00:13	227	2018-09-25	Good	1	#NULL!	#NULL!	#NULL!	#NULL!	#NULL!	#NULL!	#NULL!	#NULL!		0	#NULL!	#NULL!	#NULL!	#NULL!	#NULL!	#NULL!	#NULL!	#NULL!	#NULL!	#NULL!	#NULL!	#NULL!	#NULL!	#NULL!	#NULL!	#NULL!	#NULL!	#NULL!	#NULL!	#NULL!	#NULL!	#NULL!	#NULL!	#NULL!	1	3	#NULL!	#NULL!	#NULL!	#NULL!		1	2	1	2
2018-10-08 14:22:05	227	2018-10-08	Good	#NULL!	#NULL!	1	#NULL!	#NULL!	#NULL!	#NULL!	#NULL!	#NULL!		0	#NULL!	#NULL!	#NULL!	#NULL!	#NULL!	#NULL!	#NULL!	#NULL!	#NULL!	#NULL!	#NULL!	#NULL!	#NULL!	#NULL!	#NULL!	#NULL!	#NULL!	#NULL!	#NULL!	#NULL!	#NULL!	#NULL!	#NULL!	#NULL!	1	3	#NULL!	#NULL!	#NULL!	#NULL!		2	2	2	2
2018-10-15 10:32:24	227	2018-10-15	Not very good	#NULL!	#NULL!	1	#NULL!	#NULL!	#NULL!	#NULL!	#NULL!	#NULL!		1	5	4	4	4	2	2	2	2	1	2	2	2	4	4	4	4	2	1	4	4	4	4	4	4	2	8	#NULL!	#NULL!	#NULL!	#NULL!		4	4	4	4
2018-10-23 08:31:18	227	2018-10-23	Good	#NULL!	#NULL!	1	#NULL!	#NULL!	#NULL!	#NULL!	#NULL!	#NULL!		1	3	3	3	3	1	2	2	2	1	2	2	1	2	2	2	2	3	2	2	2	3	3	3	3	1	1	#NULL!	#NULL!	#NULL!	#NULL!		2	2	2	2
2018-11-05 08:56:35	227	2018-11-05	Tired	#NULL!	#NULL!	1	#NULL!	#NULL!	#NULL!	#NULL!	#NULL!	#NULL!		1	4	4	4	4	1	2	2	1	1	2	1	1	4	4	4	4	2	1	4	4	3	3	4	3	1	4	#NULL!	#NULL!	#NULL!	#NULL!		3	3	3	4
2018-11-12 14:30:48	227	2018-11-12	Fatigued	#NULL!	#NULL!	1	#NULL!	#NULL!	#NULL!	#NULL!	#NULL!	#NULL!		0	#NULL!	#NULL!	#NULL!	#NULL!	#NULL!	#NULL!	#NULL!	#NULL!	#NULL!	#NULL!	#NULL!	#NULL!	#NULL!	#NULL!	#NULL!	#NULL!	#NULL!	#NULL!	#NULL!	#NULL!	#NULL!	#NULL!	#NULL!	#NULL!	1	4	#NULL!	#NULL!	#NULL!	#NULL!		2	2	2	3
2018-11-19 11:23:57	227	2018-11-19	Good	#NULL!	#NULL!	1	#NULL!	#NULL!	#NULL!	#NULL!	#NULL!	#NULL!		0	#NULL!	#NULL!	#NULL!	#NULL!	#NULL!	#NULL!	#NULL!	#NULL!	#NULL!	#NULL!	#NULL!	#NULL!	#NULL!	#NULL!	#NULL!	#NULL!	#NULL!	#NULL!	#NULL!	#NULL!	#NULL!	#NULL!	#NULL!	#NULL!	1	3	#NULL!	#NULL!	#NULL!	#NULL!		2	2	2	2
2018-11-27 18:04:37	227	#NULL!	Fatigued	#NULL!	#NULL!	1	#NULL!	#NULL!	#NULL!	#NULL!	#NULL!	#NULL!		1	4	4	4	3	1	3	3	2	1	3	2	1	4	4	4	4	2	2	2	2	3	3	3	3	1	3	#NULL!	#NULL!	#NULL!	#NULL!		2	2	2	2
2018-12-11 06:33:03	227	2018-12-11	Good	#NULL!	#NULL!	1	#NULL!	#NULL!	#NULL!	#NULL!	#NULL!	#NULL!		0	#NULL!	#NULL!	#NULL!	#NULL!	#NULL!	#NULL!	#NULL!	#NULL!	#NULL!	#NULL!	#NULL!	#NULL!	#NULL!	#NULL!	#NULL!	#NULL!	#NULL!	#NULL!	#NULL!	#NULL!	#NULL!	#NULL!	#NULL!	#NULL!	1	3	#NULL!	#NULL!	#NULL!	#NULL!		2	2	2	2
2018-12-19 08:47:34	227	2018-12-19	Fine	1	#NULL!	#NULL!	#NULL!	#NULL!	#NULL!	#NULL!	#NULL!	#NULL!		#NULL!	#NULL!	#NULL!	#NULL!	#NULL!	#NULL!	#NULL!	#NULL!	#NULL!	#NULL!	#NULL!	#NULL!	#NULL!	#NULL!	#NULL!	#NULL!	#NULL!	#NULL!	#NULL!	#NULL!	#NULL!	#NULL!	#NULL!	#NULL!	#NULL!	1	2	#NULL!	#NULL!	#NULL!	#NULL!		2	2	2	2
2019-01-09 17:45:45	227	2019-01-09	Good	1	#NULL!	#NULL!	#NULL!	#NULL!	#NULL!	#NULL!	#NULL!	#NULL!		#NULL!	#NULL!	#NULL!	#NULL!	#NULL!	#NULL!	#NULL!	#NULL!	#NULL!	#NULL!	#NULL!	#NULL!	#NULL!	#NULL!	#NULL!	#NULL!	#NULL!	#NULL!	#NULL!	#NULL!	#NULL!	#NULL!	#NULL!	#NULL!	#NULL!	2	7	#NULL!	#NULL!	#NULL!	#NULL!		2	2	2	3
2019-01-16 17:08:47	227	2019-01-16	Good	1	#NULL!	#NULL!	#NULL!	#NULL!	#NULL!	#NULL!	#NULL!	#NULL!		#NULL!	#NULL!	#NULL!	#NULL!	#NULL!	#NULL!	#NULL!	#NULL!	#NULL!	#NULL!	#NULL!	#NULL!	#NULL!	#NULL!	#NULL!	#NULL!	#NULL!	#NULL!	#NULL!	#NULL!	#NULL!	#NULL!	#NULL!	#NULL!	#NULL!	2	8	#NULL!	#NULL!	#NULL!	#NULL!		4	4	3	4
2019-02-22 10:38:06	227	2019-02-22	good	1	#NULL!	#NULL!	#NULL!	#NULL!	#NULL!	#NULL!	#NULL!	#NULL!		0	#NULL!	#NULL!	#NULL!	#NULL!	#NULL!	#NULL!	#NULL!	#NULL!	#NULL!	#NULL!	#NULL!	#NULL!	#NULL!	#NULL!	#NULL!	#NULL!	#NULL!	#NULL!	#NULL!	#NULL!	#NULL!	#NULL!	#NULL!	#NULL!	2	7	#NULL!	#NULL!	#NULL!	#NULL!		3	3	3	3
2019-02-26 11:52:32	227	2019-02-26	fine	#NULL!	#NULL!	#NULL!	1	#NULL!	#NULL!	#NULL!	#NULL!	#NULL!		0	#NULL!	#NULL!	#NULL!	#NULL!	#NULL!	#NULL!	#NULL!	#NULL!	#NULL!	#NULL!	#NULL!	#NULL!	#NULL!	#NULL!	#NULL!	#NULL!	#NULL!	#NULL!	#NULL!	#NULL!	#NULL!	#NULL!	#NULL!	#NULL!	2	7	#NULL!	#NULL!	#NULL!	#NULL!		3	3	3	3
2018-09-13 14:00:24	228	2018-09-13	Average	1	#NULL!	#NULL!	#NULL!	#NULL!	#NULL!	#NULL!	#NULL!	#NULL!		1	5	3	3	5	1	1	1	1	1	1	1	1	5	4	4	4	3	3	4	3	3	3	3	3	2	7	#NULL!	#NULL!	#NULL!	#NULL!		5	5	5	5
2018-09-17 13:34:39	228	2018-09-17	Good	1	#NULL!	#NULL!	#NULL!	#NULL!	#NULL!	#NULL!	#NULL!	#NULL!		1	3	1	2	2	1	1	1	1	1	1	1	1	4	3	3	3	3	3	2	1	3	3	3	3	1	6	#NULL!	#NULL!	#NULL!	#NULL!		3	3	3	4
2018-09-27 19:30:23	228	2018-09-27	Well	1	#NULL!	#NULL!	#NULL!	#NULL!	#NULL!	#NULL!	#NULL!	#NULL!		1	2	1	1	1	1	1	1	1	1	1	1	1	3	2	2	2	4	2	3	1	1	1	1	1	1	2	#NULL!	#NULL!	#NULL!	#NULL!		1	1	1	1
2018-10-08 10:35:16	228	2018-10-08	Well	1	#NULL!	#NULL!	#NULL!	#NULL!	#NULL!	#NULL!	#NULL!	#NULL!		1	3	1	1	1	1	1	1	1	1	1	1	1	4	3	4	4	4	4	2	1	1	1	3	2	1	3	#NULL!	#NULL!	#NULL!	#NULL!		2	3	1	3
2018-10-15 10:30:07	228	2018-10-15	Horrible	#NULL!	#NULL!	1	#NULL!	#NULL!	#NULL!	#NULL!	#NULL!	#NULL!		1	5	4	4	5	2	2	2	3	1	1	2	1	5	5	5	5	3	3	3	3	3	3	3	3	1	3	#NULL!	#NULL!	#NULL!	#NULL!		2	2	1	1
2018-10-23 10:26:58	228	#NULL!	Pretty good	#NULL!	#NULL!	1	#NULL!	#NULL!	#NULL!	#NULL!	#NULL!	#NULL!		1	2	1	1	2	2	2	2	2	2	2	2	2	3	3	3	3	3	3	3	3	2	3	3	2	1	1	#NULL!	#NULL!	#NULL!	#NULL!		1	1	1	1
2018-11-05 09:08:45	228	2018-11-05	Horrible	#NULL!	#NULL!	1	#NULL!	#NULL!	#NULL!	#NULL!	#NULL!	#NULL!		1	5	3	3	5	2	2	2	2	2	2	2	2	5	5	5	5	3	2	2	2	3	3	3	3	1	1	#NULL!	#NULL!	#NULL!	#NULL!		1	1	1	1
2018-11-19 10:12:35	228	2018-11-14	Good!	#NULL!	#NULL!	1	#NULL!	#NULL!	#NULL!	#NULL!	#NULL!	#NULL!		1	2	2	2	1	1	1	2	1	1	1	2	1	4	4	4	4	4	4	4	2	3	3	3	3	1	0	#NULL!	#NULL!	#NULL!	#NULL!		#NULL!	#NULL!	#NULL!	#NULL!
2018-11-20 13:40:50	228	2018-11-20	Pretty good	#NULL!	#NULL!	1	#NULL!	#NULL!	#NULL!	#NULL!	#NULL!	#NULL!		0	#NULL!	#NULL!	#NULL!	#NULL!	#NULL!	#NULL!	#NULL!	#NULL!	#NULL!	#NULL!	#NULL!	#NULL!	#NULL!	#NULL!	#NULL!	#NULL!	#NULL!	#NULL!	#NULL!	#NULL!	#NULL!	#NULL!	#NULL!	#NULL!	1	0	#NULL!	#NULL!	#NULL!	#NULL!		#NULL!	#NULL!	#NULL!	#NULL!
2018-11-26 10:49:28	228	#NULL!	Terrible	#NULL!	#NULL!	1	#NULL!	#NULL!	#NULL!	#NULL!	#NULL!	#NULL!		1	5	3	5	4	1	1	2	2	2	2	2	2	5	5	5	5	3	1	4	2	4	4	4	4	1	1	#NULL!	#NULL!	#NULL!	#NULL!		1	1	1	1
2018-12-17 16:01:19	228	#NULL!	Very sick	#NULL!	#NULL!	1	#NULL!	#NULL!	#NULL!	#NULL!	#NULL!	#NULL!		1	5	3	3	4	1	1	1	1	1	1	1	1	5	5	5	5	3	1	4	3	3	3	3	3	1	0	#NULL!	#NULL!	#NULL!	#NULL!		#NULL!	#NULL!	#NULL!	#NULL!
2019-01-07 13:01:03	228	#NULL!	Great	#NULL!	#NULL!	1	#NULL!	#NULL!	#NULL!	#NULL!	#NULL!	#NULL!		0	#NULL!	#NULL!	#NULL!	#NULL!	#NULL!	#NULL!	#NULL!	#NULL!	#NULL!	#NULL!	#NULL!	#NULL!	#NULL!	#NULL!	#NULL!	#NULL!	#NULL!	#NULL!	#NULL!	#NULL!	#NULL!	#NULL!	#NULL!	#NULL!	1	0	#NULL!	#NULL!	#NULL!	#NULL!		#NULL!	#NULL!	#NULL!	#NULL!
2019-01-17 19:34:02	228	2019-01-17	Great, just a little tired	#NULL!	#NULL!	1	#NULL!	#NULL!	#NULL!	#NULL!	#NULL!	#NULL!		0	#NULL!	#NULL!	#NULL!	#NULL!	#NULL!	#NULL!	#NULL!	#NULL!	#NULL!	#NULL!	#NULL!	#NULL!	#NULL!	#NULL!	#NULL!	#NULL!	#NULL!	#NULL!	#NULL!	#NULL!	#NULL!	#NULL!	#NULL!	#NULL!	1	0	#NULL!	#NULL!	#NULL!	#NULL!		#NULL!	#NULL!	#NULL!	#NULL!
2019-01-24 11:43:33	228	#NULL!	Pretty good. A little run down	#NULL!	#NULL!	1	#NULL!	#NULL!	#NULL!	#NULL!	#NULL!	#NULL!		0	#NULL!	#NULL!	#NULL!	#NULL!	#NULL!	#NULL!	#NULL!	#NULL!	#NULL!	#NULL!	#NULL!	#NULL!	#NULL!	#NULL!	#NULL!	#NULL!	#NULL!	#NULL!	#NULL!	#NULL!	#NULL!	#NULL!	#NULL!	#NULL!	1	0	#NULL!	#NULL!	#NULL!	#NULL!		#NULL!	#NULL!	#NULL!	#NULL!
2019-01-30 11:08:21	228	#NULL!	Great! A little tired	#NULL!	#NULL!	1	#NULL!	#NULL!	#NULL!	#NULL!	#NULL!	#NULL!		0	#NULL!	#NULL!	#NULL!	#NULL!	#NULL!	#NULL!	#NULL!	#NULL!	#NULL!	#NULL!	#NULL!	#NULL!	#NULL!	#NULL!	#NULL!	#NULL!	#NULL!	#NULL!	#NULL!	#NULL!	#NULL!	#NULL!	#NULL!	#NULL!	1	2	#NULL!	#NULL!	#NULL!	#NULL!		1	1	1	1
2019-02-15 10:03:06	228	#NULL!	Good	#NULL!	#NULL!	1	#NULL!	#NULL!	#NULL!	#NULL!	#NULL!	#NULL!		0	#NULL!	#NULL!	#NULL!	#NULL!	#NULL!	#NULL!	#NULL!	#NULL!	#NULL!	#NULL!	#NULL!	#NULL!	#NULL!	#NULL!	#NULL!	#NULL!	#NULL!	#NULL!	#NULL!	#NULL!	#NULL!	#NULL!	#NULL!	#NULL!	1	1	#NULL!	#NULL!	#NULL!	#NULL!		1	1	1	1
2019-02-24 10:44:31	228	2019-02-24	Great!	#NULL!	#NULL!	1	#NULL!	#NULL!	#NULL!	#NULL!	#NULL!	#NULL!		0	#NULL!	#NULL!	#NULL!	#NULL!	#NULL!	#NULL!	#NULL!	#NULL!	#NULL!	#NULL!	#NULL!	#NULL!	#NULL!	#NULL!	#NULL!	#NULL!	#NULL!	#NULL!	#NULL!	#NULL!	#NULL!	#NULL!	#NULL!	#NULL!	1	0	#NULL!	#NULL!	#NULL!	#NULL!		#NULL!	#NULL!	#NULL!	#NULL!
2019-02-28 13:43:43	228	#NULL!	Tired	#NULL!	#NULL!	1	#NULL!	#NULL!	#NULL!	#NULL!	#NULL!	#NULL!		0	#NULL!	#NULL!	#NULL!	#NULL!	#NULL!	#NULL!	#NULL!	#NULL!	#NULL!	#NULL!	#NULL!	#NULL!	#NULL!	#NULL!	#NULL!	#NULL!	#NULL!	#NULL!	#NULL!	#NULL!	#NULL!	#NULL!	#NULL!	#NULL!	1	0	#NULL!	#NULL!	#NULL!	#NULL!		#NULL!	#NULL!	#NULL!	#NULL!
2019-03-17 18:07:28	228	#NULL!	Tired	#NULL!	#NULL!	1	#NULL!	#NULL!	#NULL!	#NULL!	#NULL!	#NULL!		0	#NULL!	#NULL!	#NULL!	#NULL!	#NULL!	#NULL!	#NULL!	#NULL!	#NULL!	#NULL!	#NULL!	#NULL!	#NULL!	#NULL!	#NULL!	#NULL!	#NULL!	#NULL!	#NULL!	#NULL!	#NULL!	#NULL!	#NULL!	#NULL!	1	0	#NULL!	#NULL!	#NULL!	#NULL!		#NULL!	#NULL!	#NULL!	#NULL!
2019-03-18 12:58:59	228	#NULL!	Tired	#NULL!	#NULL!	1	#NULL!	#NULL!	#NULL!	#NULL!	#NULL!	#NULL!		0	#NULL!	#NULL!	#NULL!	#NULL!	#NULL!	#NULL!	#NULL!	#NULL!	#NULL!	#NULL!	#NULL!	#NULL!	#NULL!	#NULL!	#NULL!	#NULL!	#NULL!	#NULL!	#NULL!	#NULL!	#NULL!	#NULL!	#NULL!	#NULL!	1	0	#NULL!	#NULL!	#NULL!	#NULL!		#NULL!	#NULL!	#NULL!	#NULL!
2019-04-11 12:19:53	228	#NULL!	Great!	1	#NULL!	#NULL!	#NULL!	#NULL!	#NULL!	#NULL!	#NULL!	#NULL!		0	#NULL!	#NULL!	#NULL!	#NULL!	#NULL!	#NULL!	#NULL!	#NULL!	#NULL!	#NULL!	#NULL!	#NULL!	#NULL!	#NULL!	#NULL!	#NULL!	#NULL!	#NULL!	#NULL!	#NULL!	#NULL!	#NULL!	#NULL!	#NULL!	1	0	#NULL!	#NULL!	#NULL!	#NULL!		#NULL!	#NULL!	#NULL!	#NULL!
2019-05-01 06:59:42	228	#NULL!	Good	1	#NULL!	#NULL!	#NULL!	#NULL!	#NULL!	#NULL!	#NULL!	#NULL!		0	#NULL!	#NULL!	#NULL!	#NULL!	#NULL!	#NULL!	#NULL!	#NULL!	#NULL!	#NULL!	#NULL!	#NULL!	#NULL!	#NULL!	#NULL!	#NULL!	#NULL!	#NULL!	#NULL!	#NULL!	#NULL!	#NULL!	#NULL!	#NULL!	1	0	#NULL!	#NULL!	#NULL!	#NULL!		#NULL!	#NULL!	#NULL!	#NULL!
2019-06-24 13:51:08	228	2019-06-24	Tired	1	#NULL!	#NULL!	#NULL!	#NULL!	#NULL!	#NULL!	#NULL!	#NULL!		0	#NULL!	#NULL!	#NULL!	#NULL!	#NULL!	#NULL!	#NULL!	#NULL!	#NULL!	#NULL!	#NULL!	#NULL!	#NULL!	#NULL!	#NULL!	#NULL!	#NULL!	#NULL!	#NULL!	#NULL!	#NULL!	#NULL!	#NULL!	#NULL!	1	0	#NULL!	#NULL!	#NULL!	#NULL!		#NULL!	#NULL!	#NULL!	#NULL!
2019-07-19 17:08:58	228	2019-07-19	Good	1	#NULL!	#NULL!	#NULL!	#NULL!	#NULL!	#NULL!	#NULL!	#NULL!		0	#NULL!	#NULL!	#NULL!	#NULL!	#NULL!	#NULL!	#NULL!	#NULL!	#NULL!	#NULL!	#NULL!	#NULL!	#NULL!	#NULL!	#NULL!	#NULL!	#NULL!	#NULL!	#NULL!	#NULL!	#NULL!	#NULL!	#NULL!	#NULL!	1	0	#NULL!	#NULL!	#NULL!	#NULL!		#NULL!	#NULL!	#NULL!	#NULL!
2019-08-20 20:28:36	228	2019-08-20	Great	1	#NULL!	#NULL!	#NULL!	#NULL!	#NULL!	#NULL!	#NULL!	#NULL!		1	1	1	1	1	1	3	3	3	1	1	4	1	3	2	3	3	2	2	3	2	2	2	2	2	1	1	#NULL!	#NULL!	#NULL!	#NULL!		1	1	1	1
2019-08-23 12:00:19	228	2019-08-16	Fine	1	#NULL!	#NULL!	#NULL!	#NULL!	#NULL!	#NULL!	#NULL!	#NULL!		0	#NULL!	#NULL!	#NULL!	#NULL!	#NULL!	#NULL!	#NULL!	#NULL!	#NULL!	#NULL!	#NULL!	#NULL!	#NULL!	#NULL!	#NULL!	#NULL!	#NULL!	#NULL!	#NULL!	#NULL!	#NULL!	#NULL!	#NULL!	#NULL!	1	0	#NULL!	#NULL!	#NULL!	#NULL!		#NULL!	#NULL!	#NULL!	#NULL!
2018-09-19 12:15:04	229	2018-09-19	a little sore achey and getting used to everything	1	#NULL!	#NULL!	#NULL!	#NULL!	#NULL!	#NULL!	#NULL!	#NULL!		0	#NULL!	#NULL!	#NULL!	#NULL!	#NULL!	#NULL!	#NULL!	#NULL!	#NULL!	#NULL!	#NULL!	#NULL!	#NULL!	#NULL!	#NULL!	#NULL!	#NULL!	#NULL!	#NULL!	#NULL!	#NULL!	#NULL!	#NULL!	#NULL!	1	4	#NULL!	#NULL!	#NULL!	#NULL!		3	3	3	2
2018-10-16 10:30:07	229	2018-10-10	Good	#NULL!	#NULL!	#NULL!	#NULL!	#NULL!	#NULL!	#NULL!	#NULL!	#NULL!		0	3	3	2	2	1	1	1	1	1	1	1	1	2	2	3	3	3	2	2	2	3	3	3	3	1	1	#NULL!	#NULL!	#NULL!	#NULL!		1	1	1	1
2018-10-30 12:09:33	229	2018-10-10	pretty good a little tired	1	#NULL!	#NULL!	#NULL!	#NULL!	#NULL!	#NULL!	#NULL!	#NULL!		0	#NULL!	#NULL!	#NULL!	#NULL!	#NULL!	#NULL!	#NULL!	#NULL!	#NULL!	#NULL!	#NULL!	#NULL!	#NULL!	#NULL!	#NULL!	#NULL!	#NULL!	#NULL!	#NULL!	#NULL!	#NULL!	#NULL!	#NULL!	#NULL!	1	1	#NULL!	#NULL!	#NULL!	#NULL!		2	2	2	2
2018-10-16 10:30:07	230	2018-10-10	Not good--woke up feeling bad--high blood sugar 300s	#NULL!	#NULL!	#NULL!	#NULL!	#NULL!	#NULL!	#NULL!	#NULL!	#NULL!		0	2	1	1	3	1	3	3	3	1	1	3	1	2	2	3	2	3	3	3	3	2	1	2	2	2	7	#NULL!	#NULL!	#NULL!	#NULL!		4	3	1	2
2018-11-20 14:09:45	230	2018-11-20	feels tired	#NULL!	#NULL!	1	1	#NULL!	#NULL!	#NULL!	#NULL!	#NULL!		1	3	3	3	2	1	2	3	2	1	1	3	1	2	2	2	2	2	2	3	5	1	1	3	1	1	0	#NULL!	#NULL!	#NULL!	#NULL!		#NULL!	#NULL!	#NULL!	#NULL!
2018-11-29 16:49:50	230	2018-11-29	so-so.	#NULL!	#NULL!	1	#NULL!	#NULL!	#NULL!	#NULL!	#NULL!	#NULL!		0	#NULL!	#NULL!	#NULL!	#NULL!	#NULL!	#NULL!	#NULL!	#NULL!	#NULL!	#NULL!	#NULL!	#NULL!	#NULL!	#NULL!	#NULL!	#NULL!	#NULL!	#NULL!	#NULL!	#NULL!	#NULL!	#NULL!	#NULL!	#NULL!	1	2	#NULL!	#NULL!	#NULL!	#NULL!		1	1	2	1
2018-12-11 14:13:09	230	2018-12-11	nauseous. not good. premedicated w/ meds	#NULL!	#NULL!	1	#NULL!	#NULL!	#NULL!	#NULL!	#NULL!	#NULL!		0	#NULL!	#NULL!	#NULL!	#NULL!	#NULL!	#NULL!	#NULL!	#NULL!	#NULL!	#NULL!	#NULL!	#NULL!	#NULL!	#NULL!	#NULL!	#NULL!	#NULL!	#NULL!	#NULL!	#NULL!	#NULL!	#NULL!	#NULL!	#NULL!	1	0	#NULL!	#NULL!	#NULL!	#NULL!		#NULL!	#NULL!	#NULL!	#NULL!
2019-01-14 15:32:37	230	2019-01-14	Resolved from last week a bit., hopefully nothing appears this week.	#NULL!	#NULL!	1	#NULL!	#NULL!	#NULL!	#NULL!	#NULL!	#NULL!		0	#NULL!	#NULL!	#NULL!	#NULL!	#NULL!	#NULL!	#NULL!	#NULL!	#NULL!	#NULL!	#NULL!	#NULL!	#NULL!	#NULL!	#NULL!	#NULL!	#NULL!	#NULL!	#NULL!	#NULL!	#NULL!	#NULL!	#NULL!	#NULL!	2	8	#NULL!	#NULL!	#NULL!	#NULL!		4	4	4	4
2019-01-22 11:26:01	230	2019-01-22	ok	#NULL!	#NULL!	1	#NULL!	#NULL!	#NULL!	#NULL!	#NULL!	#NULL!		0	#NULL!	#NULL!	#NULL!	#NULL!	#NULL!	#NULL!	#NULL!	#NULL!	#NULL!	#NULL!	#NULL!	#NULL!	#NULL!	#NULL!	#NULL!	#NULL!	#NULL!	#NULL!	#NULL!	#NULL!	#NULL!	#NULL!	#NULL!	#NULL!	1	4	#NULL!	#NULL!	#NULL!	#NULL!		4	4	4	4
2019-01-29 11:32:10	230	2019-01-29	"I'm doing OK"	#NULL!	#NULL!	1	#NULL!	#NULL!	#NULL!	#NULL!	#NULL!	#NULL!		0	#NULL!	#NULL!	#NULL!	#NULL!	#NULL!	#NULL!	#NULL!	#NULL!	#NULL!	#NULL!	#NULL!	#NULL!	#NULL!	#NULL!	#NULL!	#NULL!	#NULL!	#NULL!	#NULL!	#NULL!	#NULL!	#NULL!	#NULL!	#NULL!	1	0	#NULL!	#NULL!	#NULL!	#NULL!		#NULL!	#NULL!	#NULL!	#NULL!
2019-02-12 10:28:00	230	2019-02-12	"better--I got my Taxol this week"	#NULL!	#NULL!	1	#NULL!	#NULL!	#NULL!	#NULL!	#NULL!	#NULL!		0	#NULL!	#NULL!	#NULL!	#NULL!	#NULL!	#NULL!	#NULL!	#NULL!	#NULL!	#NULL!	#NULL!	#NULL!	#NULL!	#NULL!	#NULL!	#NULL!	#NULL!	#NULL!	#NULL!	#NULL!	#NULL!	#NULL!	#NULL!	#NULL!	1	0	#NULL!	#NULL!	#NULL!	#NULL!		#NULL!	#NULL!	#NULL!	#NULL!
2019-02-18 16:59:15	230	2019-02-18	peripheral neuropathy. difficulty sleeping because feet tingling.	#NULL!	#NULL!	1	#NULL!	#NULL!	#NULL!	#NULL!	#NULL!	#NULL!		0	#NULL!	#NULL!	#NULL!	#NULL!	#NULL!	#NULL!	#NULL!	#NULL!	#NULL!	#NULL!	#NULL!	#NULL!	#NULL!	#NULL!	#NULL!	#NULL!	#NULL!	#NULL!	#NULL!	#NULL!	#NULL!	#NULL!	#NULL!	#NULL!	1	5	#NULL!	#NULL!	#NULL!	#NULL!		3	3	3	4
2019-02-26 10:20:30	230	2019-02-26	"a little down--my niece just got diagnosed with breast cancer, too"	#NULL!	#NULL!	1	#NULL!	#NULL!	#NULL!	#NULL!	#NULL!	#NULL!		0	#NULL!	#NULL!	#NULL!	#NULL!	#NULL!	#NULL!	#NULL!	#NULL!	#NULL!	#NULL!	#NULL!	#NULL!	#NULL!	#NULL!	#NULL!	#NULL!	#NULL!	#NULL!	#NULL!	#NULL!	#NULL!	#NULL!	#NULL!	#NULL!	1	3	#NULL!	#NULL!	#NULL!	#NULL!		4	4	4	4
2019-03-20 10:43:29	230	2019-03-20	OKAY.	#NULL!	#NULL!	1	#NULL!	#NULL!	#NULL!	#NULL!	#NULL!	#NULL!		0	#NULL!	#NULL!	#NULL!	#NULL!	#NULL!	#NULL!	#NULL!	#NULL!	#NULL!	#NULL!	#NULL!	#NULL!	#NULL!	#NULL!	#NULL!	#NULL!	#NULL!	#NULL!	#NULL!	#NULL!	#NULL!	#NULL!	#NULL!	#NULL!	1	0	#NULL!	#NULL!	#NULL!	#NULL!		#NULL!	#NULL!	#NULL!	#NULL!
2019-03-26 12:30:24	230	2019-03-26	pretty good	1	#NULL!	#NULL!	#NULL!	#NULL!	#NULL!	#NULL!	#NULL!	#NULL!		0	#NULL!	#NULL!	#NULL!	#NULL!	#NULL!	#NULL!	#NULL!	#NULL!	#NULL!	#NULL!	#NULL!	#NULL!	#NULL!	#NULL!	#NULL!	#NULL!	#NULL!	#NULL!	#NULL!	#NULL!	#NULL!	#NULL!	#NULL!	#NULL!	1	3	#NULL!	#NULL!	#NULL!	#NULL!		2	2	2	2
2019-04-18 12:48:00	230	2019-04-18	okay	1	#NULL!	#NULL!	#NULL!	#NULL!	#NULL!	#NULL!	#NULL!	#NULL!		1	2	1	1	1	1	3	3	1	1	1	3	1	3	3	3	3	2	1	3	4	2	3	3	3	1	3	#NULL!	#NULL!	#NULL!	#NULL!		2	2	2	2
2019-06-12 15:36:20	230	2019-06-12	not too bad	1	#NULL!	#NULL!	#NULL!	#NULL!	#NULL!	#NULL!	#NULL!	#NULL!		0	#NULL!	#NULL!	#NULL!	#NULL!	#NULL!	#NULL!	#NULL!	#NULL!	#NULL!	#NULL!	#NULL!	#NULL!	#NULL!	#NULL!	#NULL!	#NULL!	#NULL!	#NULL!	#NULL!	#NULL!	#NULL!	#NULL!	#NULL!	#NULL!	1	0	#NULL!	#NULL!	#NULL!	#NULL!		#NULL!	#NULL!	#NULL!	#NULL!
2019-07-22 12:42:05	230	2019-07-22	good	1	#NULL!	#NULL!	#NULL!	#NULL!	#NULL!	#NULL!	#NULL!	#NULL!		0	#NULL!	#NULL!	#NULL!	#NULL!	#NULL!	#NULL!	#NULL!	#NULL!	#NULL!	#NULL!	#NULL!	#NULL!	#NULL!	#NULL!	#NULL!	#NULL!	#NULL!	#NULL!	#NULL!	#NULL!	#NULL!	#NULL!	#NULL!	#NULL!	1	0	#NULL!	#NULL!	#NULL!	#NULL!		#NULL!	#NULL!	#NULL!	#NULL!
2018-10-16 15:49:43	231	2018-10-16	feeling. fatigued. anxious.	1	#NULL!	#NULL!	#NULL!	#NULL!	#NULL!	#NULL!	#NULL!	#NULL!		0	#NULL!	#NULL!	#NULL!	#NULL!	#NULL!	#NULL!	#NULL!	#NULL!	#NULL!	#NULL!	#NULL!	#NULL!	#NULL!	#NULL!	#NULL!	#NULL!	#NULL!	#NULL!	#NULL!	#NULL!	#NULL!	#NULL!	#NULL!	#NULL!	1	6	#NULL!	#NULL!	#NULL!	#NULL!		4	4	3	3
2018-10-25 16:12:16	231	2018-10-25	CHEMO LAST FRIDAY. issues w/ port. pain w/ port, but doing okay	#NULL!	#NULL!	1	#NULL!	#NULL!	#NULL!	#NULL!	#NULL!	#NULL!		0	#NULL!	#NULL!	#NULL!	#NULL!	#NULL!	#NULL!	#NULL!	#NULL!	#NULL!	#NULL!	#NULL!	#NULL!	#NULL!	#NULL!	#NULL!	#NULL!	#NULL!	#NULL!	#NULL!	#NULL!	#NULL!	#NULL!	#NULL!	#NULL!	1	3	#NULL!	#NULL!	#NULL!	#NULL!		3	2	2	2
2018-11-05 14:59:23	231	2018-11-05	ok, pretty good. Go Friday for next chemo. every 3 weeks	#NULL!	#NULL!	1	#NULL!	#NULL!	#NULL!	#NULL!	#NULL!	#NULL!		0	#NULL!	#NULL!	#NULL!	#NULL!	#NULL!	#NULL!	#NULL!	#NULL!	#NULL!	#NULL!	#NULL!	#NULL!	#NULL!	#NULL!	#NULL!	#NULL!	#NULL!	#NULL!	#NULL!	#NULL!	#NULL!	#NULL!	#NULL!	#NULL!	1	0	#NULL!	#NULL!	#NULL!	#NULL!		#NULL!	#NULL!	#NULL!	#NULL!
2018-11-15 16:07:46	231	2018-11-15	at night hard time sleepingchest pressure.	#NULL!	#NULL!	1	#NULL!	#NULL!	#NULL!	#NULL!	#NULL!	#NULL!		0	#NULL!	#NULL!	#NULL!	#NULL!	#NULL!	#NULL!	#NULL!	#NULL!	#NULL!	#NULL!	#NULL!	#NULL!	#NULL!	#NULL!	#NULL!	#NULL!	#NULL!	#NULL!	#NULL!	#NULL!	#NULL!	#NULL!	#NULL!	#NULL!	1	4	#NULL!	#NULL!	#NULL!	#NULL!		1	1	1	1
2018-11-19 15:21:03	231	2018-11-19	okay. tired. not nauseated	#NULL!	#NULL!	1	#NULL!	#NULL!	#NULL!	#NULL!	#NULL!	#NULL!		0	#NULL!	#NULL!	#NULL!	#NULL!	#NULL!	#NULL!	#NULL!	#NULL!	#NULL!	#NULL!	#NULL!	#NULL!	#NULL!	#NULL!	#NULL!	#NULL!	#NULL!	#NULL!	#NULL!	#NULL!	#NULL!	#NULL!	#NULL!	#NULL!	1	4	#NULL!	#NULL!	#NULL!	#NULL!		3	3	3	3
2018-11-29 16:14:30	231	2018-11-30	tired	#NULL!	#NULL!	1	#NULL!	#NULL!	#NULL!	#NULL!	#NULL!	#NULL!		0	#NULL!	#NULL!	#NULL!	#NULL!	#NULL!	#NULL!	#NULL!	#NULL!	#NULL!	#NULL!	#NULL!	#NULL!	#NULL!	#NULL!	#NULL!	#NULL!	#NULL!	#NULL!	#NULL!	#NULL!	#NULL!	#NULL!	#NULL!	#NULL!	1	6	#NULL!	#NULL!	#NULL!	#NULL!		2	2	1	2
2018-12-14 10:49:19	231	2018-12-14	Pretty good	#NULL!	#NULL!	1	#NULL!	#NULL!	#NULL!	#NULL!	#NULL!	#NULL!		1	1	1	2	1	2	3	3	3	3	2	3	2	3	3	3	2	4	3	2	2	1	1	2	1	1	5	#NULL!	#NULL!	#NULL!	#NULL!		1	1	1	1
2019-01-28 14:50:54	231	2019-01-28	a little better	#NULL!	#NULL!	1	#NULL!	#NULL!	#NULL!	#NULL!	#NULL!	#NULL!		0	#NULL!	#NULL!	#NULL!	#NULL!	#NULL!	#NULL!	#NULL!	#NULL!	#NULL!	#NULL!	#NULL!	#NULL!	#NULL!	#NULL!	#NULL!	#NULL!	#NULL!	#NULL!	#NULL!	#NULL!	#NULL!	#NULL!	#NULL!	#NULL!	1	2	#NULL!	#NULL!	#NULL!	#NULL!		1	2	2	2
2019-02-18 17:11:05	231	2019-02-18	fatigued, muscles tired, legs hurt. doing better today	#NULL!	#NULL!	1	#NULL!	#NULL!	#NULL!	#NULL!	#NULL!	#NULL!		0	#NULL!	#NULL!	#NULL!	#NULL!	#NULL!	#NULL!	#NULL!	#NULL!	#NULL!	#NULL!	#NULL!	#NULL!	#NULL!	#NULL!	#NULL!	#NULL!	#NULL!	#NULL!	#NULL!	#NULL!	#NULL!	#NULL!	#NULL!	#NULL!	1	6	#NULL!	#NULL!	#NULL!	#NULL!		4	3	1	3
2019-02-28 11:04:12	231	2019-02-28	Still very tired, worst week yet actually threw up Sunday.	#NULL!	#NULL!	1	#NULL!	#NULL!	#NULL!	#NULL!	#NULL!	1	Taxol	1	3	1	1	1	3	3	3	3	2	3	2	2	4	4	4	3	3	3	2	2	1	4	1	1	2	7	#NULL!	#NULL!	#NULL!	#NULL!		1	1	1	1
2019-03-20 17:14:13	231	2019-03-20	a lot of pain.	#NULL!	#NULL!	1	#NULL!	#NULL!	#NULL!	#NULL!	#NULL!	#NULL!		1	5	4	5	5	3	3	4	4	4	4	4	4	4	4	4	4	3	2	3	4	1	1	1	1	3	9	#NULL!	#NULL!	#NULL!	#NULL!		4	4	4	4
2019-04-17 16:28:39	231	2019-04-17	okay	1	#NULL!	#NULL!	#NULL!	#NULL!	#NULL!	#NULL!	#NULL!	#NULL!		0	#NULL!	#NULL!	#NULL!	#NULL!	#NULL!	#NULL!	#NULL!	#NULL!	#NULL!	#NULL!	#NULL!	#NULL!	#NULL!	#NULL!	#NULL!	#NULL!	#NULL!	#NULL!	#NULL!	#NULL!	#NULL!	#NULL!	#NULL!	#NULL!	3	9	#NULL!	#NULL!	#NULL!	#NULL!		4	4	4	4
2019-04-24 17:35:04	231	2019-04-24	tired. having neuropathy. pain in back of legs.	#NULL!	#NULL!	1	#NULL!	#NULL!	#NULL!	#NULL!	#NULL!	#NULL!		0	#NULL!	#NULL!	#NULL!	#NULL!	#NULL!	#NULL!	#NULL!	#NULL!	#NULL!	#NULL!	#NULL!	#NULL!	#NULL!	#NULL!	#NULL!	#NULL!	#NULL!	#NULL!	#NULL!	#NULL!	#NULL!	#NULL!	#NULL!	#NULL!	2	7	#NULL!	#NULL!	#NULL!	#NULL!		1	2	2	2
2019-05-14 16:19:59	231	2019-05-14	bad day on saturday, better today	1	#NULL!	#NULL!	#NULL!	#NULL!	#NULL!	#NULL!	#NULL!	#NULL!		0	#NULL!	#NULL!	#NULL!	#NULL!	#NULL!	#NULL!	#NULL!	#NULL!	#NULL!	#NULL!	#NULL!	#NULL!	#NULL!	#NULL!	#NULL!	#NULL!	#NULL!	#NULL!	#NULL!	#NULL!	#NULL!	#NULL!	#NULL!	#NULL!	1	6	#NULL!	#NULL!	#NULL!	#NULL!		5	5	5	5
2019-07-17 17:09:58	231	2019-07-17	not much better	1	#NULL!	#NULL!	#NULL!	#NULL!	#NULL!	#NULL!	#NULL!	#NULL!		0	#NULL!	#NULL!	#NULL!	#NULL!	#NULL!	#NULL!	#NULL!	#NULL!	#NULL!	#NULL!	#NULL!	#NULL!	#NULL!	#NULL!	#NULL!	#NULL!	#NULL!	#NULL!	#NULL!	#NULL!	#NULL!	#NULL!	#NULL!	#NULL!	2	7	#NULL!	#NULL!	#NULL!	#NULL!		4	4	4	4
2019-07-24 16:03:38	231	2019-07-24	"my chest is healing"	1	#NULL!	#NULL!	#NULL!	#NULL!	#NULL!	#NULL!	#NULL!	#NULL!		0	#NULL!	#NULL!	#NULL!	#NULL!	#NULL!	#NULL!	#NULL!	#NULL!	#NULL!	#NULL!	#NULL!	#NULL!	#NULL!	#NULL!	#NULL!	#NULL!	#NULL!	#NULL!	#NULL!	#NULL!	#NULL!	#NULL!	#NULL!	#NULL!	1	5	#NULL!	#NULL!	#NULL!	#NULL!		3	3	3	3
2018-09-21 11:14:58	232	2018-09-21	a little nausea this morning. jp drain still draining. nurse came and checked insicion and healing	1	#NULL!	#NULL!	#NULL!	#NULL!	#NULL!	#NULL!	#NULL!	#NULL!		1	5	5	5	5	1	3	3	3	2	3	3	1	5	5	5	4	4	4	1	1	5	5	5	5	2	8	#NULL!	#NULL!	#NULL!	#NULL!		4	5	5	5
2018-09-27 11:39:56	232	2018-09-27	pretty good. had drain today	1	#NULL!	#NULL!	#NULL!	#NULL!	#NULL!	#NULL!	#NULL!	#NULL!		0	#NULL!	#NULL!	#NULL!	#NULL!	#NULL!	#NULL!	#NULL!	#NULL!	#NULL!	#NULL!	#NULL!	#NULL!	#NULL!	#NULL!	#NULL!	#NULL!	#NULL!	#NULL!	#NULL!	#NULL!	#NULL!	#NULL!	#NULL!	#NULL!	1	6	#NULL!	#NULL!	#NULL!	#NULL!		1	1	1	1
2019-02-18 18:03:01	232	2019-02-18	okay	1	#NULL!	#NULL!	#NULL!	#NULL!	#NULL!	#NULL!	#NULL!	#NULL!		#NULL!	#NULL!	#NULL!	#NULL!	#NULL!	#NULL!	#NULL!	#NULL!	#NULL!	#NULL!	#NULL!	#NULL!	#NULL!	#NULL!	#NULL!	#NULL!	#NULL!	#NULL!	#NULL!	#NULL!	#NULL!	#NULL!	#NULL!	#NULL!	#NULL!	2	8	#NULL!	#NULL!	#NULL!	#NULL!		4	4	4	4
2018-09-19 12:39:40	233	2018-09-19	really good	1	#NULL!	#NULL!	#NULL!	#NULL!	#NULL!	#NULL!	#NULL!	#NULL!		0	#NULL!	#NULL!	#NULL!	#NULL!	#NULL!	#NULL!	#NULL!	#NULL!	#NULL!	#NULL!	#NULL!	#NULL!	#NULL!	#NULL!	#NULL!	#NULL!	#NULL!	#NULL!	#NULL!	#NULL!	#NULL!	#NULL!	#NULL!	#NULL!	1	0	#NULL!	#NULL!	#NULL!	#NULL!		#NULL!	#NULL!	#NULL!	#NULL!
2018-09-27 11:28:54	233	2018-09-27	really well.	1	#NULL!	#NULL!	#NULL!	#NULL!	#NULL!	#NULL!	#NULL!	#NULL!		0	#NULL!	#NULL!	#NULL!	#NULL!	#NULL!	#NULL!	#NULL!	#NULL!	#NULL!	#NULL!	#NULL!	#NULL!	#NULL!	#NULL!	#NULL!	#NULL!	#NULL!	#NULL!	#NULL!	#NULL!	#NULL!	#NULL!	#NULL!	#NULL!	1	0	#NULL!	#NULL!	#NULL!	#NULL!		#NULL!	#NULL!	#NULL!	#NULL!
2018-10-16 10:30:08	233	2018-10-10	Really, really good	#NULL!	#NULL!	#NULL!	#NULL!	#NULL!	#NULL!	#NULL!	#NULL!	#NULL!		0	1	1	1	1	1	1	1	1	1	1	1	1	1	1	1	1	5	5	1	1	1	1	1	1	1	0	#NULL!	#NULL!	#NULL!	#NULL!		1	1	1	1
2018-12-13 16:50:54	234	2018-12-13	Ok	#NULL!	#NULL!	#NULL!	1	#NULL!	#NULL!	#NULL!	#NULL!	#NULL!		#NULL!	#NULL!	#NULL!	#NULL!	#NULL!	#NULL!	#NULL!	#NULL!	#NULL!	#NULL!	#NULL!	#NULL!	#NULL!	#NULL!	#NULL!	#NULL!	#NULL!	#NULL!	#NULL!	#NULL!	#NULL!	#NULL!	#NULL!	#NULL!	#NULL!	1	3	#NULL!	#NULL!	#NULL!	#NULL!		1	1	1	1
2019-01-30 11:27:20	234	2019-01-30	Fair	#NULL!	#NULL!	#NULL!	1	#NULL!	#NULL!	#NULL!	#NULL!	#NULL!		#NULL!	#NULL!	#NULL!	#NULL!	#NULL!	#NULL!	#NULL!	#NULL!	#NULL!	#NULL!	#NULL!	#NULL!	#NULL!	#NULL!	#NULL!	#NULL!	#NULL!	#NULL!	#NULL!	#NULL!	#NULL!	#NULL!	#NULL!	#NULL!	#NULL!	1	3	#NULL!	#NULL!	#NULL!	#NULL!		2	2	2	2
2019-02-13 12:32:09	234	2019-02-13	Good	#NULL!	#NULL!	#NULL!	1	#NULL!	#NULL!	#NULL!	#NULL!	#NULL!		#NULL!	#NULL!	#NULL!	#NULL!	#NULL!	#NULL!	#NULL!	#NULL!	#NULL!	#NULL!	#NULL!	#NULL!	#NULL!	#NULL!	#NULL!	#NULL!	#NULL!	#NULL!	#NULL!	#NULL!	#NULL!	#NULL!	#NULL!	#NULL!	#NULL!	1	1	#NULL!	#NULL!	#NULL!	#NULL!		1	1	1	1
2019-03-28 10:02:54	234	2019-03-28	Ok	#NULL!	#NULL!	#NULL!	1	#NULL!	#NULL!	#NULL!	#NULL!	#NULL!		0	#NULL!	#NULL!	#NULL!	#NULL!	#NULL!	#NULL!	#NULL!	#NULL!	#NULL!	#NULL!	#NULL!	#NULL!	#NULL!	#NULL!	#NULL!	#NULL!	#NULL!	#NULL!	#NULL!	#NULL!	#NULL!	#NULL!	#NULL!	#NULL!	1	3	#NULL!	#NULL!	#NULL!	#NULL!		2	2	2	2
2019-04-09 10:12:41	234	2019-04-09	A lot of joint pain	#NULL!	#NULL!	#NULL!	1	#NULL!	#NULL!	#NULL!	#NULL!	#NULL!		1	2	3	3	2	1	1	1	1	1	1	1	1	2	2	2	2	3	1	2	3	3	3	3	3	1	6	#NULL!	#NULL!	#NULL!	#NULL!		3	3	3	3
2019-04-17 14:52:24	234	2019-04-17	Achy	#NULL!	#NULL!	#NULL!	1	#NULL!	#NULL!	#NULL!	#NULL!	#NULL!		0	#NULL!	#NULL!	#NULL!	#NULL!	#NULL!	#NULL!	#NULL!	#NULL!	#NULL!	#NULL!	#NULL!	#NULL!	#NULL!	#NULL!	#NULL!	#NULL!	#NULL!	#NULL!	#NULL!	#NULL!	#NULL!	#NULL!	#NULL!	#NULL!	1	5	#NULL!	#NULL!	#NULL!	#NULL!		2	2	2	2
2019-04-24 14:34:55	234	2019-04-24	Okay	#NULL!	#NULL!	#NULL!	1	#NULL!	#NULL!	#NULL!	#NULL!	#NULL!		0	#NULL!	#NULL!	#NULL!	#NULL!	#NULL!	#NULL!	#NULL!	#NULL!	#NULL!	#NULL!	#NULL!	#NULL!	#NULL!	#NULL!	#NULL!	#NULL!	#NULL!	#NULL!	#NULL!	#NULL!	#NULL!	#NULL!	#NULL!	#NULL!	1	5	#NULL!	#NULL!	#NULL!	#NULL!		2	2	2	2
2019-06-27 17:47:56	234	2019-06-27	Sore	#NULL!	#NULL!	#NULL!	1	#NULL!	#NULL!	#NULL!	#NULL!	#NULL!		0	#NULL!	#NULL!	#NULL!	#NULL!	#NULL!	#NULL!	#NULL!	#NULL!	#NULL!	#NULL!	#NULL!	#NULL!	#NULL!	#NULL!	#NULL!	#NULL!	#NULL!	#NULL!	#NULL!	#NULL!	#NULL!	#NULL!	#NULL!	#NULL!	1	4	#NULL!	#NULL!	#NULL!	#NULL!		2	2	2	2
2018-10-18 16:43:28	235	2018-10-18	PRETTY GOOD	1	#NULL!	#NULL!	#NULL!	#NULL!	#NULL!	#NULL!	#NULL!	#NULL!		0	#NULL!	#NULL!	#NULL!	#NULL!	#NULL!	#NULL!	#NULL!	#NULL!	#NULL!	#NULL!	#NULL!	#NULL!	#NULL!	#NULL!	#NULL!	#NULL!	#NULL!	#NULL!	#NULL!	#NULL!	#NULL!	#NULL!	#NULL!	#NULL!	1	2	#NULL!	#NULL!	#NULL!	#NULL!		1	1	1	1
2018-10-25 16:46:30	235	2018-10-25	pretty good.	1	#NULL!	#NULL!	#NULL!	#NULL!	#NULL!	#NULL!	#NULL!	#NULL!		0	#NULL!	#NULL!	#NULL!	#NULL!	#NULL!	#NULL!	#NULL!	#NULL!	#NULL!	#NULL!	#NULL!	#NULL!	#NULL!	#NULL!	#NULL!	#NULL!	#NULL!	#NULL!	#NULL!	#NULL!	#NULL!	#NULL!	#NULL!	#NULL!	1	2	#NULL!	#NULL!	#NULL!	#NULL!		1	1	1	1
2018-11-05 14:47:13	235	2018-11-05	overall well	1	#NULL!	#NULL!	#NULL!	#NULL!	#NULL!	#NULL!	#NULL!	#NULL!		0	#NULL!	#NULL!	#NULL!	#NULL!	#NULL!	#NULL!	#NULL!	#NULL!	#NULL!	#NULL!	#NULL!	#NULL!	#NULL!	#NULL!	#NULL!	#NULL!	#NULL!	#NULL!	#NULL!	#NULL!	#NULL!	#NULL!	#NULL!	#NULL!	1	2	#NULL!	#NULL!	#NULL!	#NULL!		2	2	2	2
2018-11-14 12:27:24	235	2018-11-14	really good	1	#NULL!	#NULL!	#NULL!	#NULL!	#NULL!	#NULL!	#NULL!	#NULL!		#NULL!	#NULL!	#NULL!	#NULL!	#NULL!	#NULL!	#NULL!	#NULL!	#NULL!	#NULL!	#NULL!	#NULL!	#NULL!	#NULL!	#NULL!	#NULL!	#NULL!	#NULL!	#NULL!	#NULL!	#NULL!	#NULL!	#NULL!	#NULL!	#NULL!	1	3	#NULL!	#NULL!	#NULL!	#NULL!		1	1	1	1
2018-12-11 16:34:36	235	2018-12-11	not great	#NULL!	#NULL!	1	#NULL!	#NULL!	#NULL!	#NULL!	#NULL!	#NULL!		0	#NULL!	#NULL!	#NULL!	#NULL!	#NULL!	#NULL!	#NULL!	#NULL!	#NULL!	#NULL!	#NULL!	#NULL!	#NULL!	#NULL!	#NULL!	#NULL!	#NULL!	#NULL!	#NULL!	#NULL!	#NULL!	#NULL!	#NULL!	#NULL!	1	5	#NULL!	#NULL!	#NULL!	#NULL!		1	1	1	1
2019-02-15 11:20:07	235	2019-02-15	OK, a little tired	#NULL!	#NULL!	1	#NULL!	#NULL!	#NULL!	#NULL!	#NULL!	#NULL!		0	#NULL!	#NULL!	#NULL!	#NULL!	#NULL!	#NULL!	#NULL!	#NULL!	#NULL!	#NULL!	#NULL!	#NULL!	#NULL!	#NULL!	#NULL!	#NULL!	#NULL!	#NULL!	#NULL!	#NULL!	#NULL!	#NULL!	#NULL!	#NULL!	1	3	#NULL!	#NULL!	#NULL!	#NULL!		1	1	1	1
2019-03-20 11:06:08	235	2019-03-20	Okay. felt really sick after one treatment a few weeks ago.	#NULL!	#NULL!	1	#NULL!	#NULL!	#NULL!	#NULL!	#NULL!	#NULL!		0	#NULL!	#NULL!	#NULL!	#NULL!	#NULL!	#NULL!	#NULL!	#NULL!	#NULL!	#NULL!	#NULL!	#NULL!	#NULL!	#NULL!	#NULL!	#NULL!	#NULL!	#NULL!	#NULL!	#NULL!	#NULL!	#NULL!	#NULL!	#NULL!	1	5	#NULL!	#NULL!	#NULL!	#NULL!		1	1	1	1
2019-04-17 15:46:55	235	2019-04-17	SAME TIRED. fatigued	#NULL!	#NULL!	1	#NULL!	#NULL!	#NULL!	#NULL!	#NULL!	#NULL!		0	#NULL!	#NULL!	#NULL!	#NULL!	#NULL!	#NULL!	#NULL!	#NULL!	#NULL!	#NULL!	#NULL!	#NULL!	#NULL!	#NULL!	#NULL!	#NULL!	#NULL!	#NULL!	#NULL!	#NULL!	#NULL!	#NULL!	#NULL!	#NULL!	1	4	#NULL!	#NULL!	#NULL!	#NULL!		1	1	1	1
2019-04-22 17:23:40	235	2019-04-22	TIRED FATIGUED	#NULL!	#NULL!	1	#NULL!	#NULL!	#NULL!	#NULL!	#NULL!	#NULL!		0	#NULL!	#NULL!	#NULL!	#NULL!	#NULL!	#NULL!	#NULL!	#NULL!	#NULL!	#NULL!	#NULL!	#NULL!	#NULL!	#NULL!	#NULL!	#NULL!	#NULL!	#NULL!	#NULL!	#NULL!	#NULL!	#NULL!	#NULL!	#NULL!	1	0	#NULL!	#NULL!	#NULL!	#NULL!		#NULL!	#NULL!	#NULL!	#NULL!
2019-05-13 12:43:06	235	2019-05-13	Has a cough	#NULL!	#NULL!	1	#NULL!	#NULL!	#NULL!	#NULL!	#NULL!	#NULL!		0	#NULL!	#NULL!	#NULL!	#NULL!	#NULL!	#NULL!	#NULL!	#NULL!	#NULL!	#NULL!	#NULL!	#NULL!	#NULL!	#NULL!	#NULL!	#NULL!	#NULL!	#NULL!	#NULL!	#NULL!	#NULL!	#NULL!	#NULL!	#NULL!	1	3	#NULL!	#NULL!	#NULL!	#NULL!		1	1	1	1
2019-08-21 13:17:55	235	2019-08-21	Resumed radiation and finished, 2 weeks off of that still pretty tired.	1	#NULL!	#NULL!	#NULL!	#NULL!	#NULL!	#NULL!	#NULL!	#NULL!		0	#NULL!	#NULL!	#NULL!	#NULL!	#NULL!	#NULL!	#NULL!	#NULL!	#NULL!	#NULL!	#NULL!	#NULL!	#NULL!	#NULL!	#NULL!	#NULL!	#NULL!	#NULL!	#NULL!	#NULL!	#NULL!	#NULL!	#NULL!	#NULL!	1	2	#NULL!	#NULL!	#NULL!	#NULL!		1	1	1	1
2019-08-28 16:22:34	235	2019-08-28	first day back to work	#NULL!	#NULL!	#NULL!	1	#NULL!	#NULL!	#NULL!	#NULL!	#NULL!		0	#NULL!	#NULL!	#NULL!	#NULL!	#NULL!	#NULL!	#NULL!	#NULL!	#NULL!	#NULL!	#NULL!	#NULL!	#NULL!	#NULL!	#NULL!	#NULL!	#NULL!	#NULL!	#NULL!	#NULL!	#NULL!	#NULL!	#NULL!	#NULL!	1	3	#NULL!	#NULL!	#NULL!	#NULL!		1	1	1	1
2018-10-26 20:50:50	236	2018-10-26	Well	1	#NULL!	#NULL!	#NULL!	#NULL!	#NULL!	#NULL!	#NULL!	#NULL!		0	#NULL!	#NULL!	#NULL!	#NULL!	#NULL!	#NULL!	#NULL!	#NULL!	#NULL!	#NULL!	#NULL!	#NULL!	#NULL!	#NULL!	#NULL!	#NULL!	#NULL!	#NULL!	#NULL!	#NULL!	#NULL!	#NULL!	#NULL!	#NULL!	1	2	#NULL!	#NULL!	#NULL!	#NULL!		1	1	1	1
2018-10-15 11:28:11	237	2018-10-15	Good	1	#NULL!	#NULL!	#NULL!	#NULL!	#NULL!	#NULL!	#NULL!	#NULL!		0	#NULL!	#NULL!	#NULL!	#NULL!	#NULL!	#NULL!	#NULL!	#NULL!	#NULL!	#NULL!	#NULL!	#NULL!	#NULL!	#NULL!	#NULL!	#NULL!	#NULL!	#NULL!	#NULL!	#NULL!	#NULL!	#NULL!	#NULL!	#NULL!	1	3	#NULL!	#NULL!	#NULL!	#NULL!		2	2	2	2
2018-11-19 16:25:17	237	2018-11-19	good	1	#NULL!	#NULL!	#NULL!	#NULL!	#NULL!	#NULL!	#NULL!	#NULL!		#NULL!	#NULL!	#NULL!	#NULL!	#NULL!	#NULL!	#NULL!	#NULL!	#NULL!	#NULL!	#NULL!	#NULL!	#NULL!	#NULL!	#NULL!	#NULL!	#NULL!	#NULL!	#NULL!	#NULL!	#NULL!	#NULL!	#NULL!	#NULL!	#NULL!	1	0	#NULL!	#NULL!	#NULL!	#NULL!		#NULL!	#NULL!	#NULL!	#NULL!
2018-10-17 18:50:34	238	2018-10-17	Fine. No major pain from surgery; just some tightness under my arms.	1	#NULL!	#NULL!	#NULL!	#NULL!	#NULL!	#NULL!	#NULL!	#NULL!		1	5	1	1	2	1	1	1	1	1	1	2	1	2	3	2	2	4	2	1	1	4	3	3	4	1	4	#NULL!	#NULL!	#NULL!	#NULL!		2	2	2	2
2018-10-23 22:07:38	238	2018-10-23	100% better since drains were removed last Wednesday!	1	#NULL!	#NULL!	#NULL!	#NULL!	#NULL!	#NULL!	#NULL!	#NULL!		1	3	1	1	2	1	1	1	2	1	1	2	1	2	2	2	2	4	4	1	1	4	4	3	3	1	3	#NULL!	#NULL!	#NULL!	#NULL!		2	3	3	3
2018-11-05 09:37:39	238	2018-11-05	Very well except for some underarm discomfort	1	#NULL!	#NULL!	#NULL!	#NULL!	#NULL!	#NULL!	#NULL!	#NULL!		0	#NULL!	#NULL!	#NULL!	#NULL!	#NULL!	#NULL!	#NULL!	#NULL!	#NULL!	#NULL!	#NULL!	#NULL!	#NULL!	#NULL!	#NULL!	#NULL!	#NULL!	#NULL!	#NULL!	#NULL!	#NULL!	#NULL!	#NULL!	#NULL!	1	0	#NULL!	#NULL!	#NULL!	#NULL!		#NULL!	#NULL!	#NULL!	#NULL!
2018-11-12 20:10:23	238	2018-11-12	Good	1	#NULL!	#NULL!	#NULL!	#NULL!	#NULL!	#NULL!	#NULL!	#NULL!		#NULL!	#NULL!	#NULL!	#NULL!	#NULL!	#NULL!	#NULL!	#NULL!	#NULL!	#NULL!	#NULL!	#NULL!	#NULL!	#NULL!	#NULL!	#NULL!	#NULL!	#NULL!	#NULL!	#NULL!	#NULL!	#NULL!	#NULL!	#NULL!	#NULL!	1	0	#NULL!	#NULL!	#NULL!	#NULL!		#NULL!	#NULL!	#NULL!	#NULL!
2019-01-16 17:39:31	238	2019-01-16	Better, since my radiation burn is almost healed.	1	#NULL!	#NULL!	#NULL!	#NULL!	#NULL!	#NULL!	#NULL!	#NULL!		#NULL!	#NULL!	#NULL!	#NULL!	#NULL!	#NULL!	#NULL!	#NULL!	#NULL!	#NULL!	#NULL!	#NULL!	#NULL!	#NULL!	#NULL!	#NULL!	#NULL!	#NULL!	#NULL!	#NULL!	#NULL!	#NULL!	#NULL!	#NULL!	#NULL!	1	2	#NULL!	#NULL!	#NULL!	#NULL!		1	2	1	2
2019-01-23 17:53:20	238	2019-01-23	Good	1	#NULL!	#NULL!	#NULL!	#NULL!	#NULL!	#NULL!	#NULL!	#NULL!		#NULL!	#NULL!	#NULL!	#NULL!	#NULL!	#NULL!	#NULL!	#NULL!	#NULL!	#NULL!	#NULL!	#NULL!	#NULL!	#NULL!	#NULL!	#NULL!	#NULL!	#NULL!	#NULL!	#NULL!	#NULL!	#NULL!	#NULL!	#NULL!	#NULL!	1	0	#NULL!	#NULL!	#NULL!	#NULL!		#NULL!	#NULL!	#NULL!	#NULL!
2019-01-30 21:02:50	238	2019-01-31	Good	1	#NULL!	#NULL!	#NULL!	#NULL!	#NULL!	#NULL!	#NULL!	#NULL!		#NULL!	#NULL!	#NULL!	#NULL!	#NULL!	#NULL!	#NULL!	#NULL!	#NULL!	#NULL!	#NULL!	#NULL!	#NULL!	#NULL!	#NULL!	#NULL!	#NULL!	#NULL!	#NULL!	#NULL!	#NULL!	#NULL!	#NULL!	#NULL!	#NULL!	1	0	#NULL!	#NULL!	#NULL!	#NULL!		#NULL!	#NULL!	#NULL!	#NULL!
2019-02-14 09:14:03	238	2019-02-14	Good	1	#NULL!	#NULL!	#NULL!	#NULL!	#NULL!	#NULL!	#NULL!	#NULL!		#NULL!	#NULL!	#NULL!	#NULL!	#NULL!	#NULL!	#NULL!	#NULL!	#NULL!	#NULL!	#NULL!	#NULL!	#NULL!	#NULL!	#NULL!	#NULL!	#NULL!	#NULL!	#NULL!	#NULL!	#NULL!	#NULL!	#NULL!	#NULL!	#NULL!	1	0	#NULL!	#NULL!	#NULL!	#NULL!		#NULL!	#NULL!	#NULL!	#NULL!
2019-02-20 08:18:59	238	2019-02-20	Good	1	#NULL!	#NULL!	#NULL!	#NULL!	#NULL!	#NULL!	#NULL!	#NULL!		#NULL!	#NULL!	#NULL!	#NULL!	#NULL!	#NULL!	#NULL!	#NULL!	#NULL!	#NULL!	#NULL!	#NULL!	#NULL!	#NULL!	#NULL!	#NULL!	#NULL!	#NULL!	#NULL!	#NULL!	#NULL!	#NULL!	#NULL!	#NULL!	#NULL!	1	0	#NULL!	#NULL!	#NULL!	#NULL!		#NULL!	#NULL!	#NULL!	#NULL!
2019-02-28 10:36:31	238	2019-02-28	a little tired	#NULL!	#NULL!	#NULL!	#NULL!	#NULL!	#NULL!	#NULL!	#NULL!	1	immuniotherapy trial of Keytruda	0	#NULL!	#NULL!	#NULL!	#NULL!	#NULL!	#NULL!	#NULL!	#NULL!	#NULL!	#NULL!	#NULL!	#NULL!	#NULL!	#NULL!	#NULL!	#NULL!	#NULL!	#NULL!	#NULL!	#NULL!	#NULL!	#NULL!	#NULL!	#NULL!	1	0	#NULL!	#NULL!	#NULL!	#NULL!		#NULL!	#NULL!	#NULL!	#NULL!
2019-03-21 14:29:16	238	2019-03-22	Good	#NULL!	#NULL!	#NULL!	#NULL!	#NULL!	#NULL!	#NULL!	#NULL!	1	Keytruda trial	0	#NULL!	#NULL!	#NULL!	#NULL!	#NULL!	#NULL!	#NULL!	#NULL!	#NULL!	#NULL!	#NULL!	#NULL!	#NULL!	#NULL!	#NULL!	#NULL!	#NULL!	#NULL!	#NULL!	#NULL!	#NULL!	#NULL!	#NULL!	#NULL!	1	0	#NULL!	#NULL!	#NULL!	#NULL!		#NULL!	#NULL!	#NULL!	#NULL!
2019-03-25 15:30:54	238	2019-03-25	Tired	#NULL!	#NULL!	#NULL!	#NULL!	#NULL!	#NULL!	#NULL!	#NULL!	1	Keytruda	0	#NULL!	#NULL!	#NULL!	#NULL!	#NULL!	#NULL!	#NULL!	#NULL!	#NULL!	#NULL!	#NULL!	#NULL!	#NULL!	#NULL!	#NULL!	#NULL!	#NULL!	#NULL!	#NULL!	#NULL!	#NULL!	#NULL!	#NULL!	#NULL!	1	0	#NULL!	#NULL!	#NULL!	#NULL!		#NULL!	#NULL!	#NULL!	#NULL!
2019-04-09 20:12:03	238	2019-04-09	Good	#NULL!	#NULL!	#NULL!	#NULL!	#NULL!	#NULL!	#NULL!	#NULL!	1	Keytruda	0	#NULL!	#NULL!	#NULL!	#NULL!	#NULL!	#NULL!	#NULL!	#NULL!	#NULL!	#NULL!	#NULL!	#NULL!	#NULL!	#NULL!	#NULL!	#NULL!	#NULL!	#NULL!	#NULL!	#NULL!	#NULL!	#NULL!	#NULL!	#NULL!	1	0	#NULL!	#NULL!	#NULL!	#NULL!		#NULL!	#NULL!	#NULL!	#NULL!
2019-04-15 11:41:07	238	#NULL!	good	#NULL!	#NULL!	#NULL!	#NULL!	#NULL!	#NULL!	#NULL!	#NULL!	1	Keytruda	0	#NULL!	#NULL!	#NULL!	#NULL!	#NULL!	#NULL!	#NULL!	#NULL!	#NULL!	#NULL!	#NULL!	#NULL!	#NULL!	#NULL!	#NULL!	#NULL!	#NULL!	#NULL!	#NULL!	#NULL!	#NULL!	#NULL!	#NULL!	#NULL!	1	0	#NULL!	#NULL!	#NULL!	#NULL!		#NULL!	#NULL!	#NULL!	#NULL!
2019-04-23 08:14:05	238	2019-04-23	Good	#NULL!	#NULL!	#NULL!	#NULL!	#NULL!	#NULL!	#NULL!	#NULL!	1	Keytruda	0	#NULL!	#NULL!	#NULL!	#NULL!	#NULL!	#NULL!	#NULL!	#NULL!	#NULL!	#NULL!	#NULL!	#NULL!	#NULL!	#NULL!	#NULL!	#NULL!	#NULL!	#NULL!	#NULL!	#NULL!	#NULL!	#NULL!	#NULL!	#NULL!	1	0	#NULL!	#NULL!	#NULL!	#NULL!		#NULL!	#NULL!	#NULL!	#NULL!
2019-05-14 11:04:40	238	2019-05-14	Recovering from reconstruction - a little sore	#NULL!	#NULL!	#NULL!	#NULL!	#NULL!	#NULL!	#NULL!	#NULL!	1	Keyruda	1	5	1	1	1	2	2	1	2	1	2	1	1	3	2	2	2	3	3	2	1	4	3	3	3	1	3	#NULL!	#NULL!	#NULL!	#NULL!		3	3	3	3
2019-06-10 20:19:58	238	2019-06-10	Ok	#NULL!	#NULL!	#NULL!	#NULL!	#NULL!	#NULL!	#NULL!	#NULL!	1	Keyruda	1	2	1	1	1	2	1	1	2	2	1	3	2	4	3	3	3	4	3	2	1	2	3	3	2	1	0	#NULL!	#NULL!	#NULL!	#NULL!		#NULL!	#NULL!	#NULL!	#NULL!
2019-06-17 19:31:44	238	2019-06-17	Fine but tired	#NULL!	#NULL!	#NULL!	#NULL!	#NULL!	#NULL!	#NULL!	#NULL!	1	Keytruda	1	2	1	1	1	2	1	2	2	1	1	2	1	3	3	3	3	3	3	2	1	3	3	2	3	1	0	#NULL!	#NULL!	#NULL!	#NULL!		#NULL!	#NULL!	#NULL!	#NULL!
2019-06-25 20:20:22	238	2019-06-25	Good	#NULL!	#NULL!	#NULL!	#NULL!	#NULL!	#NULL!	#NULL!	#NULL!	1	Keytruda	0	#NULL!	#NULL!	#NULL!	#NULL!	#NULL!	#NULL!	#NULL!	#NULL!	#NULL!	#NULL!	#NULL!	#NULL!	#NULL!	#NULL!	#NULL!	#NULL!	#NULL!	#NULL!	#NULL!	#NULL!	#NULL!	#NULL!	#NULL!	#NULL!	1	0	#NULL!	#NULL!	#NULL!	#NULL!		#NULL!	#NULL!	#NULL!	#NULL!
2019-07-16 15:02:36	238	2019-07-16	Better but tired	#NULL!	#NULL!	#NULL!	#NULL!	#NULL!	#NULL!	#NULL!	#NULL!	1	Keytruda	0	#NULL!	#NULL!	#NULL!	#NULL!	#NULL!	#NULL!	#NULL!	#NULL!	#NULL!	#NULL!	#NULL!	#NULL!	#NULL!	#NULL!	#NULL!	#NULL!	#NULL!	#NULL!	#NULL!	#NULL!	#NULL!	#NULL!	#NULL!	#NULL!	1	1	#NULL!	#NULL!	#NULL!	#NULL!		1	1	1	1
2019-08-12 11:39:36	238	2019-08-12	Fine	#NULL!	#NULL!	#NULL!	#NULL!	#NULL!	#NULL!	#NULL!	#NULL!	1	Keytruda	0	#NULL!	#NULL!	#NULL!	#NULL!	#NULL!	#NULL!	#NULL!	#NULL!	#NULL!	#NULL!	#NULL!	#NULL!	#NULL!	#NULL!	#NULL!	#NULL!	#NULL!	#NULL!	#NULL!	#NULL!	#NULL!	#NULL!	#NULL!	#NULL!	1	0	#NULL!	#NULL!	#NULL!	#NULL!		#NULL!	#NULL!	#NULL!	#NULL!
2019-08-19 13:06:34	238	2019-08-19	fine	#NULL!	#NULL!	#NULL!	#NULL!	#NULL!	#NULL!	#NULL!	#NULL!	1	Keytruda	0	#NULL!	#NULL!	#NULL!	#NULL!	#NULL!	#NULL!	#NULL!	#NULL!	#NULL!	#NULL!	#NULL!	#NULL!	#NULL!	#NULL!	#NULL!	#NULL!	#NULL!	#NULL!	#NULL!	#NULL!	#NULL!	#NULL!	#NULL!	#NULL!	1	0	#NULL!	#NULL!	#NULL!	#NULL!		#NULL!	#NULL!	#NULL!	#NULL!
2019-08-30 08:42:37	238	2019-08-30	Loss of vision in left eye: admitted to Presbyterian Monday night	#NULL!	#NULL!	#NULL!	#NULL!	#NULL!	#NULL!	#NULL!	#NULL!	1	Halting Keytruda	1	2	2	2	2	4	2	2	3	3	4	4	4	2	2	2	2	4	3	1	1	2	2	2	2	1	0	#NULL!	#NULL!	#NULL!	#NULL!		#NULL!	#NULL!	#NULL!	#NULL!
2019-09-17 17:43:24	238	2019-09-17	Ok	1	#NULL!	#NULL!	#NULL!	#NULL!	#NULL!	#NULL!	#NULL!	#NULL!		0	#NULL!	#NULL!	#NULL!	#NULL!	#NULL!	#NULL!	#NULL!	#NULL!	#NULL!	#NULL!	#NULL!	#NULL!	#NULL!	#NULL!	#NULL!	#NULL!	#NULL!	#NULL!	#NULL!	#NULL!	#NULL!	#NULL!	#NULL!	#NULL!	1	0	#NULL!	#NULL!	#NULL!	#NULL!		#NULL!	#NULL!	#NULL!	#NULL!
2019-09-27 13:59:45	238	2019-09-27	Fine	1	#NULL!	#NULL!	#NULL!	#NULL!	#NULL!	#NULL!	#NULL!	#NULL!		0	#NULL!	#NULL!	#NULL!	#NULL!	#NULL!	#NULL!	#NULL!	#NULL!	#NULL!	#NULL!	#NULL!	#NULL!	#NULL!	#NULL!	#NULL!	#NULL!	#NULL!	#NULL!	#NULL!	#NULL!	#NULL!	#NULL!	#NULL!	#NULL!	1	0	#NULL!	#NULL!	#NULL!	#NULL!		#NULL!	#NULL!	#NULL!	#NULL!
2019-10-07 19:31:46	238	2019-10-07	Ok	1	#NULL!	#NULL!	#NULL!	#NULL!	#NULL!	#NULL!	#NULL!	#NULL!		0	#NULL!	#NULL!	#NULL!	#NULL!	#NULL!	#NULL!	#NULL!	#NULL!	#NULL!	#NULL!	#NULL!	#NULL!	#NULL!	#NULL!	#NULL!	#NULL!	#NULL!	#NULL!	#NULL!	#NULL!	#NULL!	#NULL!	#NULL!	#NULL!	1	0	#NULL!	#NULL!	#NULL!	#NULL!		#NULL!	#NULL!	#NULL!	#NULL!
2018-10-16 10:30:08	239	2018-10-10	Better than last week	#NULL!	#NULL!	#NULL!	#NULL!	#NULL!	#NULL!	#NULL!	#NULL!	#NULL!		0	5	1	1	2	1	1	1	2	1	1	1	1	4	2	3	3	4	3	1	1	3	3	4	4	1	5	#NULL!	#NULL!	#NULL!	#NULL!		1	1	1	4
2018-10-18 17:23:15	239	2018-10-18	sore	1	#NULL!	#NULL!	#NULL!	#NULL!	#NULL!	#NULL!	#NULL!	#NULL!		0	#NULL!	#NULL!	#NULL!	#NULL!	#NULL!	#NULL!	#NULL!	#NULL!	#NULL!	#NULL!	#NULL!	#NULL!	#NULL!	#NULL!	#NULL!	#NULL!	#NULL!	#NULL!	#NULL!	#NULL!	#NULL!	#NULL!	#NULL!	#NULL!	1	3	#NULL!	#NULL!	#NULL!	#NULL!		2	2	2	2
2018-11-05 09:01:36	239	2018-11-05	Good overall	1	#NULL!	#NULL!	#NULL!	#NULL!	#NULL!	#NULL!	#NULL!	#NULL!		0	#NULL!	#NULL!	#NULL!	#NULL!	#NULL!	#NULL!	#NULL!	#NULL!	#NULL!	#NULL!	#NULL!	#NULL!	#NULL!	#NULL!	#NULL!	#NULL!	#NULL!	#NULL!	#NULL!	#NULL!	#NULL!	#NULL!	#NULL!	#NULL!	1	1	#NULL!	#NULL!	#NULL!	#NULL!		2	1	1	2
2018-11-12 15:54:17	239	2018-11-12	Good most of the week; a little ill today	1	#NULL!	#NULL!	#NULL!	#NULL!	#NULL!	#NULL!	#NULL!	#NULL!		#NULL!	#NULL!	#NULL!	#NULL!	#NULL!	#NULL!	#NULL!	#NULL!	#NULL!	#NULL!	#NULL!	#NULL!	#NULL!	#NULL!	#NULL!	#NULL!	#NULL!	#NULL!	#NULL!	#NULL!	#NULL!	#NULL!	#NULL!	#NULL!	#NULL!	1	0	#NULL!	#NULL!	#NULL!	#NULL!		#NULL!	#NULL!	#NULL!	#NULL!
2018-11-20 10:13:49	239	2018-11-20	Good	1	#NULL!	#NULL!	#NULL!	#NULL!	#NULL!	#NULL!	#NULL!	#NULL!		#NULL!	#NULL!	#NULL!	#NULL!	#NULL!	#NULL!	#NULL!	#NULL!	#NULL!	#NULL!	#NULL!	#NULL!	#NULL!	#NULL!	#NULL!	#NULL!	#NULL!	#NULL!	#NULL!	#NULL!	#NULL!	#NULL!	#NULL!	#NULL!	#NULL!	1	1	#NULL!	#NULL!	#NULL!	#NULL!		1	1	1	1
2019-01-07 16:07:41	239	2019-01-07	mainly good; some fatigue and headaches	1	#NULL!	#NULL!	#NULL!	#NULL!	#NULL!	#NULL!	#NULL!	#NULL!		#NULL!	#NULL!	#NULL!	#NULL!	#NULL!	#NULL!	#NULL!	#NULL!	#NULL!	#NULL!	#NULL!	#NULL!	#NULL!	#NULL!	#NULL!	#NULL!	#NULL!	#NULL!	#NULL!	#NULL!	#NULL!	#NULL!	#NULL!	#NULL!	#NULL!	1	1	#NULL!	#NULL!	#NULL!	#NULL!		2	1	1	2
2019-01-14 14:23:26	239	2019-01-14	had a mild cold last week; low appetite today	1	#NULL!	#NULL!	#NULL!	#NULL!	#NULL!	#NULL!	#NULL!	#NULL!		#NULL!	#NULL!	#NULL!	#NULL!	#NULL!	#NULL!	#NULL!	#NULL!	#NULL!	#NULL!	#NULL!	#NULL!	#NULL!	#NULL!	#NULL!	#NULL!	#NULL!	#NULL!	#NULL!	#NULL!	#NULL!	#NULL!	#NULL!	#NULL!	#NULL!	1	2	#NULL!	#NULL!	#NULL!	#NULL!		2	1	1	2
2019-01-23 15:56:13	239	2019-01-23	have had several headaches over the past week that are hard to get rid of	#NULL!	#NULL!	#NULL!	1	#NULL!	#NULL!	#NULL!	#NULL!	#NULL!		#NULL!	#NULL!	#NULL!	#NULL!	#NULL!	#NULL!	#NULL!	#NULL!	#NULL!	#NULL!	#NULL!	#NULL!	#NULL!	#NULL!	#NULL!	#NULL!	#NULL!	#NULL!	#NULL!	#NULL!	#NULL!	#NULL!	#NULL!	#NULL!	#NULL!	1	2	#NULL!	#NULL!	#NULL!	#NULL!		2	1	1	1
2019-01-30 11:10:31	239	2019-01-30	overall good, but still getting headaches a few times per week	#NULL!	#NULL!	#NULL!	1	#NULL!	#NULL!	#NULL!	#NULL!	#NULL!		#NULL!	#NULL!	#NULL!	#NULL!	#NULL!	#NULL!	#NULL!	#NULL!	#NULL!	#NULL!	#NULL!	#NULL!	#NULL!	#NULL!	#NULL!	#NULL!	#NULL!	#NULL!	#NULL!	#NULL!	#NULL!	#NULL!	#NULL!	#NULL!	#NULL!	1	1	#NULL!	#NULL!	#NULL!	#NULL!		1	1	1	1
2018-10-16 10:30:08	240	2018-10-10	Real good	#NULL!	#NULL!	#NULL!	#NULL!	#NULL!	#NULL!	#NULL!	#NULL!	#NULL!		0	3	1	1	5	2	1	4	3	1	1	4	1	4	4	4	4	4	3	3	1	1	1	2	1	1	3	#NULL!	#NULL!	#NULL!	#NULL!		1	1	1	1
2018-10-18 17:09:06	240	2018-10-18	good	1	#NULL!	#NULL!	#NULL!	#NULL!	#NULL!	#NULL!	#NULL!	#NULL!		0	#NULL!	#NULL!	#NULL!	#NULL!	#NULL!	#NULL!	#NULL!	#NULL!	#NULL!	#NULL!	#NULL!	#NULL!	#NULL!	#NULL!	#NULL!	#NULL!	#NULL!	#NULL!	#NULL!	#NULL!	#NULL!	#NULL!	#NULL!	#NULL!	1	0	#NULL!	#NULL!	#NULL!	#NULL!		#NULL!	#NULL!	#NULL!	#NULL!
2018-10-15 22:55:26	241	2018-10-15	very good	1	#NULL!	#NULL!	#NULL!	#NULL!	#NULL!	#NULL!	#NULL!	#NULL!		0	#NULL!	#NULL!	#NULL!	#NULL!	#NULL!	#NULL!	#NULL!	#NULL!	#NULL!	#NULL!	#NULL!	#NULL!	#NULL!	#NULL!	#NULL!	#NULL!	#NULL!	#NULL!	#NULL!	#NULL!	#NULL!	#NULL!	#NULL!	#NULL!	1	6	#NULL!	#NULL!	#NULL!	#NULL!		3	3	3	3
2018-10-26 11:10:12	241	2018-10-26	good	1	#NULL!	#NULL!	#NULL!	#NULL!	#NULL!	#NULL!	#NULL!	#NULL!		0	#NULL!	#NULL!	#NULL!	#NULL!	#NULL!	#NULL!	#NULL!	#NULL!	#NULL!	#NULL!	#NULL!	#NULL!	#NULL!	#NULL!	#NULL!	#NULL!	#NULL!	#NULL!	#NULL!	#NULL!	#NULL!	#NULL!	#NULL!	#NULL!	1	4	#NULL!	#NULL!	#NULL!	#NULL!		3	3	2	3
2018-11-05 08:55:08	241	2018-11-05	good	1	#NULL!	#NULL!	#NULL!	#NULL!	#NULL!	#NULL!	#NULL!	#NULL!		0	#NULL!	#NULL!	#NULL!	#NULL!	#NULL!	#NULL!	#NULL!	#NULL!	#NULL!	#NULL!	#NULL!	#NULL!	#NULL!	#NULL!	#NULL!	#NULL!	#NULL!	#NULL!	#NULL!	#NULL!	#NULL!	#NULL!	#NULL!	#NULL!	1	4	#NULL!	#NULL!	#NULL!	#NULL!		3	3	1	3
2018-12-02 23:28:14	241	2018-12-02	fine	1	#NULL!	#NULL!	#NULL!	#NULL!	#NULL!	#NULL!	#NULL!	#NULL!		#NULL!	#NULL!	#NULL!	#NULL!	#NULL!	#NULL!	#NULL!	#NULL!	#NULL!	#NULL!	#NULL!	#NULL!	#NULL!	#NULL!	#NULL!	#NULL!	#NULL!	#NULL!	#NULL!	#NULL!	#NULL!	#NULL!	#NULL!	#NULL!	#NULL!	1	5	#NULL!	#NULL!	#NULL!	#NULL!		3	3	2	3
2018-12-18 16:52:51	241	2018-12-19	fine	1	#NULL!	#NULL!	#NULL!	#NULL!	#NULL!	#NULL!	#NULL!	#NULL!		#NULL!	#NULL!	#NULL!	#NULL!	#NULL!	#NULL!	#NULL!	#NULL!	#NULL!	#NULL!	#NULL!	#NULL!	#NULL!	#NULL!	#NULL!	#NULL!	#NULL!	#NULL!	#NULL!	#NULL!	#NULL!	#NULL!	#NULL!	#NULL!	#NULL!	1	5	#NULL!	#NULL!	#NULL!	#NULL!		2	2	2	2
2019-02-19 01:14:53	241	2019-02-19	good	1	#NULL!	#NULL!	#NULL!	#NULL!	#NULL!	#NULL!	#NULL!	#NULL!		#NULL!	#NULL!	#NULL!	#NULL!	#NULL!	#NULL!	#NULL!	#NULL!	#NULL!	#NULL!	#NULL!	#NULL!	#NULL!	#NULL!	#NULL!	#NULL!	#NULL!	#NULL!	#NULL!	#NULL!	#NULL!	#NULL!	#NULL!	#NULL!	#NULL!	1	3	#NULL!	#NULL!	#NULL!	#NULL!		3	3	2	3
2019-04-15 23:23:06	241	2019-04-15	fine	#NULL!	#NULL!	1	#NULL!	#NULL!	#NULL!	#NULL!	#NULL!	#NULL!		0	#NULL!	#NULL!	#NULL!	#NULL!	#NULL!	#NULL!	#NULL!	#NULL!	#NULL!	#NULL!	#NULL!	#NULL!	#NULL!	#NULL!	#NULL!	#NULL!	#NULL!	#NULL!	#NULL!	#NULL!	#NULL!	#NULL!	#NULL!	#NULL!	1	1	#NULL!	#NULL!	#NULL!	#NULL!		1	1	1	1
2018-10-25 17:21:30	243	2018-10-25	doing okay.	1	#NULL!	#NULL!	#NULL!	#NULL!	#NULL!	#NULL!	#NULL!	#NULL!		0	#NULL!	#NULL!	#NULL!	#NULL!	#NULL!	#NULL!	#NULL!	#NULL!	#NULL!	#NULL!	#NULL!	#NULL!	#NULL!	#NULL!	#NULL!	#NULL!	#NULL!	#NULL!	#NULL!	#NULL!	#NULL!	#NULL!	#NULL!	#NULL!	1	3	#NULL!	#NULL!	#NULL!	#NULL!		1	2	1	2
2018-11-05 16:42:35	243	2018-11-05	doing okay. Just had a follow up with doctor	1	#NULL!	#NULL!	#NULL!	#NULL!	#NULL!	#NULL!	#NULL!	#NULL!		#NULL!	#NULL!	#NULL!	#NULL!	#NULL!	#NULL!	#NULL!	#NULL!	#NULL!	#NULL!	#NULL!	#NULL!	#NULL!	#NULL!	#NULL!	#NULL!	#NULL!	#NULL!	#NULL!	#NULL!	#NULL!	#NULL!	#NULL!	#NULL!	#NULL!	1	2	#NULL!	#NULL!	#NULL!	#NULL!		2	2	1	2
2018-12-19 10:55:32	243	2018-12-19	feeling good	1	#NULL!	#NULL!	#NULL!	#NULL!	#NULL!	#NULL!	#NULL!	#NULL!		#NULL!	#NULL!	#NULL!	#NULL!	#NULL!	#NULL!	#NULL!	#NULL!	#NULL!	#NULL!	#NULL!	#NULL!	#NULL!	#NULL!	#NULL!	#NULL!	#NULL!	#NULL!	#NULL!	#NULL!	#NULL!	#NULL!	#NULL!	#NULL!	#NULL!	1	0	#NULL!	#NULL!	#NULL!	#NULL!		#NULL!	#NULL!	#NULL!	#NULL!
2018-10-25 18:05:07	244	2018-10-25	ended up in ER because nicked a nerve	1	#NULL!	#NULL!	#NULL!	#NULL!	#NULL!	#NULL!	#NULL!	#NULL!		0	#NULL!	#NULL!	#NULL!	#NULL!	#NULL!	#NULL!	#NULL!	#NULL!	#NULL!	#NULL!	#NULL!	#NULL!	#NULL!	#NULL!	#NULL!	#NULL!	#NULL!	#NULL!	#NULL!	#NULL!	#NULL!	#NULL!	#NULL!	#NULL!	1	4	#NULL!	#NULL!	#NULL!	#NULL!		5	4	5	5
2018-11-09 10:52:25	244	2018-11-09	better	1	#NULL!	#NULL!	#NULL!	#NULL!	#NULL!	#NULL!	#NULL!	#NULL!		#NULL!	#NULL!	#NULL!	#NULL!	#NULL!	#NULL!	#NULL!	#NULL!	#NULL!	#NULL!	#NULL!	#NULL!	#NULL!	#NULL!	#NULL!	#NULL!	#NULL!	#NULL!	#NULL!	#NULL!	#NULL!	#NULL!	#NULL!	#NULL!	#NULL!	1	6	#NULL!	#NULL!	#NULL!	#NULL!		1	1	1	1
2018-11-12 17:08:59	244	2018-11-12	tired	1	#NULL!	#NULL!	#NULL!	#NULL!	#NULL!	#NULL!	#NULL!	#NULL!		#NULL!	#NULL!	#NULL!	#NULL!	#NULL!	#NULL!	#NULL!	#NULL!	#NULL!	#NULL!	#NULL!	#NULL!	#NULL!	#NULL!	#NULL!	#NULL!	#NULL!	#NULL!	#NULL!	#NULL!	#NULL!	#NULL!	#NULL!	#NULL!	#NULL!	1	4	#NULL!	#NULL!	#NULL!	#NULL!		2	2	1	2
2018-11-26 14:23:44	244	2018-11-26	pretty good	1	#NULL!	#NULL!	#NULL!	#NULL!	#NULL!	#NULL!	#NULL!	#NULL!		#NULL!	#NULL!	#NULL!	#NULL!	#NULL!	#NULL!	#NULL!	#NULL!	#NULL!	#NULL!	#NULL!	#NULL!	#NULL!	#NULL!	#NULL!	#NULL!	#NULL!	#NULL!	#NULL!	#NULL!	#NULL!	#NULL!	#NULL!	#NULL!	#NULL!	1	6	#NULL!	#NULL!	#NULL!	#NULL!		1	1	1	1
2019-03-11 18:48:37	244	2019-03-11	Tired	#NULL!	#NULL!	#NULL!	#NULL!	#NULL!	#NULL!	#NULL!	#NULL!	1	Antibiotics for a bladder scope	0	#NULL!	#NULL!	#NULL!	#NULL!	#NULL!	#NULL!	#NULL!	#NULL!	#NULL!	#NULL!	#NULL!	#NULL!	#NULL!	#NULL!	#NULL!	#NULL!	#NULL!	#NULL!	#NULL!	#NULL!	#NULL!	#NULL!	#NULL!	#NULL!	1	5	#NULL!	#NULL!	#NULL!	#NULL!		2	2	1	2
2019-03-18 18:23:03	244	2019-03-18	Fine	1	#NULL!	#NULL!	#NULL!	#NULL!	#NULL!	#NULL!	#NULL!	#NULL!		0	#NULL!	#NULL!	#NULL!	#NULL!	#NULL!	#NULL!	#NULL!	#NULL!	#NULL!	#NULL!	#NULL!	#NULL!	#NULL!	#NULL!	#NULL!	#NULL!	#NULL!	#NULL!	#NULL!	#NULL!	#NULL!	#NULL!	#NULL!	#NULL!	1	5	#NULL!	#NULL!	#NULL!	#NULL!		2	2	1	2
2019-04-09 15:09:16	244	2019-04-09	Better today	1	#NULL!	#NULL!	#NULL!	#NULL!	#NULL!	#NULL!	#NULL!	#NULL!		0	#NULL!	#NULL!	#NULL!	#NULL!	#NULL!	#NULL!	#NULL!	#NULL!	#NULL!	#NULL!	#NULL!	#NULL!	#NULL!	#NULL!	#NULL!	#NULL!	#NULL!	#NULL!	#NULL!	#NULL!	#NULL!	#NULL!	#NULL!	#NULL!	1	4	#NULL!	#NULL!	#NULL!	#NULL!		1	2	1	2
2019-04-17 15:19:37	244	2019-04-17	Ok	1	#NULL!	#NULL!	#NULL!	#NULL!	#NULL!	#NULL!	#NULL!	#NULL!		0	#NULL!	#NULL!	#NULL!	#NULL!	#NULL!	#NULL!	#NULL!	#NULL!	#NULL!	#NULL!	#NULL!	#NULL!	#NULL!	#NULL!	#NULL!	#NULL!	#NULL!	#NULL!	#NULL!	#NULL!	#NULL!	#NULL!	#NULL!	#NULL!	1	3	#NULL!	#NULL!	#NULL!	#NULL!		1	2	1	3
2019-04-23 17:22:10	244	2019-04-23	Fine	1	#NULL!	#NULL!	#NULL!	#NULL!	#NULL!	#NULL!	#NULL!	#NULL!		0	#NULL!	#NULL!	#NULL!	#NULL!	#NULL!	#NULL!	#NULL!	#NULL!	#NULL!	#NULL!	#NULL!	#NULL!	#NULL!	#NULL!	#NULL!	#NULL!	#NULL!	#NULL!	#NULL!	#NULL!	#NULL!	#NULL!	#NULL!	#NULL!	1	4	#NULL!	#NULL!	#NULL!	#NULL!		2	2	2	2
2019-05-14 12:51:37	244	2019-05-14	Tired and Down	1	#NULL!	#NULL!	#NULL!	#NULL!	#NULL!	#NULL!	#NULL!	#NULL!		1	4	3	3	3	3	3	3	3	3	3	4	3	4	4	4	3	4	2	1	1	4	4	4	3	1	5	#NULL!	#NULL!	#NULL!	#NULL!		2	2	2	2
2018-11-07 09:01:30	245	2018-11-07	pretty well. Better each day	1	#NULL!	#NULL!	#NULL!	#NULL!	#NULL!	#NULL!	#NULL!	#NULL!		#NULL!	#NULL!	#NULL!	#NULL!	#NULL!	#NULL!	#NULL!	#NULL!	#NULL!	#NULL!	#NULL!	#NULL!	#NULL!	#NULL!	#NULL!	#NULL!	#NULL!	#NULL!	#NULL!	#NULL!	#NULL!	#NULL!	#NULL!	#NULL!	#NULL!	1	3	#NULL!	#NULL!	#NULL!	#NULL!		3	3	3	2
2018-11-12 13:41:56	245	2018-11-12	increasingly better.	1	#NULL!	#NULL!	#NULL!	#NULL!	#NULL!	#NULL!	#NULL!	#NULL!		#NULL!	#NULL!	#NULL!	#NULL!	#NULL!	#NULL!	#NULL!	#NULL!	#NULL!	#NULL!	#NULL!	#NULL!	#NULL!	#NULL!	#NULL!	#NULL!	#NULL!	#NULL!	#NULL!	#NULL!	#NULL!	#NULL!	#NULL!	#NULL!	#NULL!	1	3	#NULL!	#NULL!	#NULL!	#NULL!		2	2	3	2
2018-11-20 13:31:19	245	2018-11-20	much more tired than before	1	#NULL!	#NULL!	#NULL!	#NULL!	#NULL!	#NULL!	#NULL!	#NULL!		#NULL!	#NULL!	#NULL!	#NULL!	#NULL!	#NULL!	#NULL!	#NULL!	#NULL!	#NULL!	#NULL!	#NULL!	#NULL!	#NULL!	#NULL!	#NULL!	#NULL!	#NULL!	#NULL!	#NULL!	#NULL!	#NULL!	#NULL!	#NULL!	#NULL!	1	1	#NULL!	#NULL!	#NULL!	#NULL!		2	1	2	1
2018-11-29 08:35:31	245	2018-11-29	improving each week. Lots of fatigue now, but much better	1	#NULL!	#NULL!	#NULL!	#NULL!	#NULL!	#NULL!	#NULL!	#NULL!		#NULL!	#NULL!	#NULL!	#NULL!	#NULL!	#NULL!	#NULL!	#NULL!	#NULL!	#NULL!	#NULL!	#NULL!	#NULL!	#NULL!	#NULL!	#NULL!	#NULL!	#NULL!	#NULL!	#NULL!	#NULL!	#NULL!	#NULL!	#NULL!	#NULL!	1	2	#NULL!	#NULL!	#NULL!	#NULL!		2	1	2	1
2019-01-07 14:46:47	245	2019-01-07	very good	1	#NULL!	#NULL!	#NULL!	#NULL!	#NULL!	#NULL!	#NULL!	#NULL!		#NULL!	#NULL!	#NULL!	#NULL!	#NULL!	#NULL!	#NULL!	#NULL!	#NULL!	#NULL!	#NULL!	#NULL!	#NULL!	#NULL!	#NULL!	#NULL!	#NULL!	#NULL!	#NULL!	#NULL!	#NULL!	#NULL!	#NULL!	#NULL!	#NULL!	1	3	#NULL!	#NULL!	#NULL!	#NULL!		2	2	1	1
2019-01-23 15:50:20	245	2019-01-23	fine	1	#NULL!	#NULL!	#NULL!	#NULL!	#NULL!	#NULL!	#NULL!	#NULL!		#NULL!	#NULL!	#NULL!	#NULL!	#NULL!	#NULL!	#NULL!	#NULL!	#NULL!	#NULL!	#NULL!	#NULL!	#NULL!	#NULL!	#NULL!	#NULL!	#NULL!	#NULL!	#NULL!	#NULL!	#NULL!	#NULL!	#NULL!	#NULL!	#NULL!	1	1	#NULL!	#NULL!	#NULL!	#NULL!		1	1	1	1
2019-02-06 15:07:58	245	2019-01-30	Fine - no problems	1	#NULL!	#NULL!	#NULL!	#NULL!	#NULL!	#NULL!	#NULL!	#NULL!		#NULL!	#NULL!	#NULL!	#NULL!	#NULL!	#NULL!	#NULL!	#NULL!	#NULL!	#NULL!	#NULL!	#NULL!	#NULL!	#NULL!	#NULL!	#NULL!	#NULL!	#NULL!	#NULL!	#NULL!	#NULL!	#NULL!	#NULL!	#NULL!	#NULL!	1	0	#NULL!	#NULL!	#NULL!	#NULL!		#NULL!	#NULL!	#NULL!	#NULL!
2018-11-05 15:03:08	246	2018-11-05	pretty good, still sore	1	#NULL!	#NULL!	#NULL!	#NULL!	#NULL!	#NULL!	#NULL!	#NULL!		0	#NULL!	#NULL!	#NULL!	#NULL!	#NULL!	#NULL!	#NULL!	#NULL!	#NULL!	#NULL!	#NULL!	#NULL!	#NULL!	#NULL!	#NULL!	#NULL!	#NULL!	#NULL!	#NULL!	#NULL!	#NULL!	#NULL!	#NULL!	#NULL!	1	0	#NULL!	#NULL!	#NULL!	#NULL!		#NULL!	#NULL!	#NULL!	#NULL!
2018-11-12 16:54:26	246	2018-11-12	not too bad.	1	#NULL!	#NULL!	#NULL!	#NULL!	#NULL!	#NULL!	#NULL!	#NULL!		#NULL!	#NULL!	#NULL!	#NULL!	#NULL!	#NULL!	#NULL!	#NULL!	#NULL!	#NULL!	#NULL!	#NULL!	#NULL!	#NULL!	#NULL!	#NULL!	#NULL!	#NULL!	#NULL!	#NULL!	#NULL!	#NULL!	#NULL!	#NULL!	#NULL!	2	7	#NULL!	#NULL!	#NULL!	#NULL!		5	5	5	5
2018-11-30 10:10:56	246	2018-11-30	pretty good	1	#NULL!	#NULL!	#NULL!	#NULL!	#NULL!	#NULL!	#NULL!	#NULL!		1	2	2	2	1	2	2	2	2	2	2	2	2	3	3	3	3	3	4	4	1	3	3	3	3	1	0	#NULL!	#NULL!	#NULL!	#NULL!		#NULL!	#NULL!	#NULL!	#NULL!
2019-02-25 13:39:41	246	2019-02-25	good	1	#NULL!	#NULL!	#NULL!	#NULL!	#NULL!	#NULL!	#NULL!	#NULL!		0	#NULL!	#NULL!	#NULL!	#NULL!	#NULL!	#NULL!	#NULL!	#NULL!	#NULL!	#NULL!	#NULL!	#NULL!	#NULL!	#NULL!	#NULL!	#NULL!	#NULL!	#NULL!	#NULL!	#NULL!	#NULL!	#NULL!	#NULL!	#NULL!	1	0	#NULL!	#NULL!	#NULL!	#NULL!		#NULL!	#NULL!	#NULL!	#NULL!
2019-03-22 13:34:09	246	#NULL!	pretty good	#NULL!	#NULL!	#NULL!	#NULL!	#NULL!	#NULL!	#NULL!	#NULL!	1	Anti estrogen pill starts with L cant think of it just started	1	2	2	5	2	3	4	3	3	4	1	4	1	5	5	4	4	3	1	4	3	3	3	4	3	1	3	#NULL!	#NULL!	#NULL!	#NULL!		5	5	2	5
2018-11-09 10:37:23	247	2018-11-09	pretty well	1	#NULL!	#NULL!	#NULL!	#NULL!	#NULL!	#NULL!	#NULL!	#NULL!		#NULL!	#NULL!	#NULL!	#NULL!	#NULL!	#NULL!	#NULL!	#NULL!	#NULL!	#NULL!	#NULL!	#NULL!	#NULL!	#NULL!	#NULL!	#NULL!	#NULL!	#NULL!	#NULL!	#NULL!	#NULL!	#NULL!	#NULL!	#NULL!	#NULL!	1	2	#NULL!	#NULL!	#NULL!	#NULL!		1	1	1	1
2018-11-12 18:10:13	247	2018-11-12	PRETTY WELL	1	#NULL!	#NULL!	#NULL!	#NULL!	#NULL!	#NULL!	#NULL!	#NULL!		#NULL!	#NULL!	#NULL!	#NULL!	#NULL!	#NULL!	#NULL!	#NULL!	#NULL!	#NULL!	#NULL!	#NULL!	#NULL!	#NULL!	#NULL!	#NULL!	#NULL!	#NULL!	#NULL!	#NULL!	#NULL!	#NULL!	#NULL!	#NULL!	#NULL!	1	2	#NULL!	#NULL!	#NULL!	#NULL!		2	1	2	1
2018-11-28 11:12:22	247	2018-11-28	great	1	#NULL!	#NULL!	#NULL!	#NULL!	#NULL!	#NULL!	#NULL!	#NULL!		#NULL!	#NULL!	#NULL!	#NULL!	#NULL!	#NULL!	#NULL!	#NULL!	#NULL!	#NULL!	#NULL!	#NULL!	#NULL!	#NULL!	#NULL!	#NULL!	#NULL!	#NULL!	#NULL!	#NULL!	#NULL!	#NULL!	#NULL!	#NULL!	#NULL!	1	0	#NULL!	#NULL!	#NULL!	#NULL!		#NULL!	#NULL!	#NULL!	#NULL!
2019-01-25 10:08:51	247	2019-01-25	good	#NULL!	#NULL!	#NULL!	1	#NULL!	#NULL!	#NULL!	#NULL!	#NULL!		#NULL!	#NULL!	#NULL!	#NULL!	#NULL!	#NULL!	#NULL!	#NULL!	#NULL!	#NULL!	#NULL!	#NULL!	#NULL!	#NULL!	#NULL!	#NULL!	#NULL!	#NULL!	#NULL!	#NULL!	#NULL!	#NULL!	#NULL!	#NULL!	#NULL!	1	0	#NULL!	#NULL!	#NULL!	#NULL!		#NULL!	#NULL!	#NULL!	#NULL!
2019-01-29 11:54:05	247	2019-01-29	little nausea	#NULL!	#NULL!	#NULL!	1	#NULL!	#NULL!	#NULL!	#NULL!	#NULL!		#NULL!	#NULL!	#NULL!	#NULL!	#NULL!	#NULL!	#NULL!	#NULL!	#NULL!	#NULL!	#NULL!	#NULL!	#NULL!	#NULL!	#NULL!	#NULL!	#NULL!	#NULL!	#NULL!	#NULL!	#NULL!	#NULL!	#NULL!	#NULL!	#NULL!	1	0	#NULL!	#NULL!	#NULL!	#NULL!		#NULL!	#NULL!	#NULL!	#NULL!
2018-11-07 13:34:44	248	2018-11-07	Better	1	#NULL!	#NULL!	#NULL!	#NULL!	#NULL!	#NULL!	#NULL!	#NULL!		#NULL!	#NULL!	#NULL!	#NULL!	#NULL!	#NULL!	#NULL!	#NULL!	#NULL!	#NULL!	#NULL!	#NULL!	#NULL!	#NULL!	#NULL!	#NULL!	#NULL!	#NULL!	#NULL!	#NULL!	#NULL!	#NULL!	#NULL!	#NULL!	#NULL!	1	3	#NULL!	#NULL!	#NULL!	#NULL!		3	4	4	4
2018-11-12 17:29:07	248	2018-11-12	Fair	1	#NULL!	#NULL!	#NULL!	#NULL!	#NULL!	#NULL!	#NULL!	#NULL!		#NULL!	#NULL!	#NULL!	#NULL!	#NULL!	#NULL!	#NULL!	#NULL!	#NULL!	#NULL!	#NULL!	#NULL!	#NULL!	#NULL!	#NULL!	#NULL!	#NULL!	#NULL!	#NULL!	#NULL!	#NULL!	#NULL!	#NULL!	#NULL!	#NULL!	1	3	#NULL!	#NULL!	#NULL!	#NULL!		3	3	2	3
2018-11-19 11:20:50	248	2018-11-19	Better	1	#NULL!	#NULL!	#NULL!	#NULL!	#NULL!	#NULL!	#NULL!	#NULL!		#NULL!	#NULL!	#NULL!	#NULL!	#NULL!	#NULL!	#NULL!	#NULL!	#NULL!	#NULL!	#NULL!	#NULL!	#NULL!	#NULL!	#NULL!	#NULL!	#NULL!	#NULL!	#NULL!	#NULL!	#NULL!	#NULL!	#NULL!	#NULL!	#NULL!	1	2	#NULL!	#NULL!	#NULL!	#NULL!		3	3	2	3
2018-11-26 10:29:21	248	2018-11-26	Good	1	#NULL!	#NULL!	#NULL!	#NULL!	#NULL!	#NULL!	#NULL!	#NULL!		#NULL!	#NULL!	#NULL!	#NULL!	#NULL!	#NULL!	#NULL!	#NULL!	#NULL!	#NULL!	#NULL!	#NULL!	#NULL!	#NULL!	#NULL!	#NULL!	#NULL!	#NULL!	#NULL!	#NULL!	#NULL!	#NULL!	#NULL!	#NULL!	#NULL!	1	2	#NULL!	#NULL!	#NULL!	#NULL!		2	2	1	2
2018-12-11 12:38:16	248	2018-12-11	Good	1	#NULL!	#NULL!	#NULL!	#NULL!	#NULL!	#NULL!	#NULL!	#NULL!		#NULL!	#NULL!	#NULL!	#NULL!	#NULL!	#NULL!	#NULL!	#NULL!	#NULL!	#NULL!	#NULL!	#NULL!	#NULL!	#NULL!	#NULL!	#NULL!	#NULL!	#NULL!	#NULL!	#NULL!	#NULL!	#NULL!	#NULL!	#NULL!	#NULL!	1	2	#NULL!	#NULL!	#NULL!	#NULL!		2	2	1	2
2019-01-30 13:50:00	248	2019-01-30	Quesy	#NULL!	#NULL!	#NULL!	1	#NULL!	#NULL!	#NULL!	#NULL!	#NULL!		#NULL!	#NULL!	#NULL!	#NULL!	#NULL!	#NULL!	#NULL!	#NULL!	#NULL!	#NULL!	#NULL!	#NULL!	#NULL!	#NULL!	#NULL!	#NULL!	#NULL!	#NULL!	#NULL!	#NULL!	#NULL!	#NULL!	#NULL!	#NULL!	#NULL!	1	1	#NULL!	#NULL!	#NULL!	#NULL!		1	1	1	1
2019-01-30 16:11:27	248	2019-01-23	Better	1	#NULL!	#NULL!	#NULL!	#NULL!	#NULL!	#NULL!	#NULL!	#NULL!		#NULL!	#NULL!	#NULL!	#NULL!	#NULL!	#NULL!	#NULL!	#NULL!	#NULL!	#NULL!	#NULL!	#NULL!	#NULL!	#NULL!	#NULL!	#NULL!	#NULL!	#NULL!	#NULL!	#NULL!	#NULL!	#NULL!	#NULL!	#NULL!	#NULL!	1	1	#NULL!	#NULL!	#NULL!	#NULL!		2	1	1	1
2018-11-29 16:36:24	249	2018-11-29	alright	1	#NULL!	#NULL!	#NULL!	#NULL!	#NULL!	#NULL!	#NULL!	#NULL!		#NULL!	#NULL!	#NULL!	#NULL!	#NULL!	#NULL!	#NULL!	#NULL!	#NULL!	#NULL!	#NULL!	#NULL!	#NULL!	#NULL!	#NULL!	#NULL!	#NULL!	#NULL!	#NULL!	#NULL!	#NULL!	#NULL!	#NULL!	#NULL!	#NULL!	1	0	#NULL!	#NULL!	#NULL!	#NULL!		#NULL!	#NULL!	#NULL!	#NULL!
2018-11-06 11:03:03	250	2018-11-06	Well	1	#NULL!	#NULL!	#NULL!	#NULL!	#NULL!	#NULL!	#NULL!	#NULL!		#NULL!	#NULL!	#NULL!	#NULL!	#NULL!	#NULL!	#NULL!	#NULL!	#NULL!	#NULL!	#NULL!	#NULL!	#NULL!	#NULL!	#NULL!	#NULL!	#NULL!	#NULL!	#NULL!	#NULL!	#NULL!	#NULL!	#NULL!	#NULL!	#NULL!	1	0	#NULL!	#NULL!	#NULL!	#NULL!		#NULL!	#NULL!	#NULL!	#NULL!
2018-11-12 18:39:41	250	2018-11-12	Well	1	#NULL!	#NULL!	#NULL!	#NULL!	#NULL!	#NULL!	#NULL!	#NULL!		#NULL!	#NULL!	#NULL!	#NULL!	#NULL!	#NULL!	#NULL!	#NULL!	#NULL!	#NULL!	#NULL!	#NULL!	#NULL!	#NULL!	#NULL!	#NULL!	#NULL!	#NULL!	#NULL!	#NULL!	#NULL!	#NULL!	#NULL!	#NULL!	#NULL!	1	0	#NULL!	#NULL!	#NULL!	#NULL!		#NULL!	#NULL!	#NULL!	#NULL!
2018-11-20 15:10:29	250	2018-11-20	Good	1	#NULL!	#NULL!	#NULL!	#NULL!	#NULL!	#NULL!	#NULL!	#NULL!		#NULL!	#NULL!	#NULL!	#NULL!	#NULL!	#NULL!	#NULL!	#NULL!	#NULL!	#NULL!	#NULL!	#NULL!	#NULL!	#NULL!	#NULL!	#NULL!	#NULL!	#NULL!	#NULL!	#NULL!	#NULL!	#NULL!	#NULL!	#NULL!	#NULL!	1	0	#NULL!	#NULL!	#NULL!	#NULL!		#NULL!	#NULL!	#NULL!	#NULL!
2018-11-28 17:38:58	250	2018-11-28	Well	1	#NULL!	#NULL!	#NULL!	#NULL!	#NULL!	#NULL!	#NULL!	#NULL!		#NULL!	#NULL!	#NULL!	#NULL!	#NULL!	#NULL!	#NULL!	#NULL!	#NULL!	#NULL!	#NULL!	#NULL!	#NULL!	#NULL!	#NULL!	#NULL!	#NULL!	#NULL!	#NULL!	#NULL!	#NULL!	#NULL!	#NULL!	#NULL!	#NULL!	1	0	#NULL!	#NULL!	#NULL!	#NULL!		#NULL!	#NULL!	#NULL!	#NULL!
2018-12-11 16:32:21	250	2018-12-11	Well	1	#NULL!	#NULL!	#NULL!	#NULL!	#NULL!	#NULL!	#NULL!	#NULL!		#NULL!	#NULL!	#NULL!	#NULL!	#NULL!	#NULL!	#NULL!	#NULL!	#NULL!	#NULL!	#NULL!	#NULL!	#NULL!	#NULL!	#NULL!	#NULL!	#NULL!	#NULL!	#NULL!	#NULL!	#NULL!	#NULL!	#NULL!	#NULL!	#NULL!	1	0	#NULL!	#NULL!	#NULL!	#NULL!		#NULL!	#NULL!	#NULL!	#NULL!
2018-12-17 18:20:09	250	2018-12-17	Fine	1	#NULL!	#NULL!	#NULL!	#NULL!	#NULL!	#NULL!	#NULL!	#NULL!		#NULL!	#NULL!	#NULL!	#NULL!	#NULL!	#NULL!	#NULL!	#NULL!	#NULL!	#NULL!	#NULL!	#NULL!	#NULL!	#NULL!	#NULL!	#NULL!	#NULL!	#NULL!	#NULL!	#NULL!	#NULL!	#NULL!	#NULL!	#NULL!	#NULL!	1	0	#NULL!	#NULL!	#NULL!	#NULL!		#NULL!	#NULL!	#NULL!	#NULL!
2019-01-07 12:03:57	250	2019-01-07	Well	1	#NULL!	#NULL!	#NULL!	#NULL!	#NULL!	#NULL!	#NULL!	#NULL!		#NULL!	#NULL!	#NULL!	#NULL!	#NULL!	#NULL!	#NULL!	#NULL!	#NULL!	#NULL!	#NULL!	#NULL!	#NULL!	#NULL!	#NULL!	#NULL!	#NULL!	#NULL!	#NULL!	#NULL!	#NULL!	#NULL!	#NULL!	#NULL!	#NULL!	1	0	#NULL!	#NULL!	#NULL!	#NULL!		#NULL!	#NULL!	#NULL!	#NULL!
2019-01-14 13:06:27	250	2019-01-14	Fine	1	#NULL!	#NULL!	#NULL!	#NULL!	#NULL!	#NULL!	#NULL!	#NULL!		#NULL!	#NULL!	#NULL!	#NULL!	#NULL!	#NULL!	#NULL!	#NULL!	#NULL!	#NULL!	#NULL!	#NULL!	#NULL!	#NULL!	#NULL!	#NULL!	#NULL!	#NULL!	#NULL!	#NULL!	#NULL!	#NULL!	#NULL!	#NULL!	#NULL!	1	0	#NULL!	#NULL!	#NULL!	#NULL!		#NULL!	#NULL!	#NULL!	#NULL!
2019-02-19 15:44:15	250	2019-02-19	Somewhat tired.	1	#NULL!	#NULL!	#NULL!	#NULL!	#NULL!	#NULL!	#NULL!	#NULL!		#NULL!	#NULL!	#NULL!	#NULL!	#NULL!	#NULL!	#NULL!	#NULL!	#NULL!	#NULL!	#NULL!	#NULL!	#NULL!	#NULL!	#NULL!	#NULL!	#NULL!	#NULL!	#NULL!	#NULL!	#NULL!	#NULL!	#NULL!	#NULL!	#NULL!	1	0	#NULL!	#NULL!	#NULL!	#NULL!		#NULL!	#NULL!	#NULL!	#NULL!
2019-02-26 19:00:50	250	2019-02-26	A little tired.	1	#NULL!	#NULL!	#NULL!	#NULL!	#NULL!	#NULL!	#NULL!	#NULL!		0	#NULL!	#NULL!	#NULL!	#NULL!	#NULL!	#NULL!	#NULL!	#NULL!	#NULL!	#NULL!	#NULL!	#NULL!	#NULL!	#NULL!	#NULL!	#NULL!	#NULL!	#NULL!	#NULL!	#NULL!	#NULL!	#NULL!	#NULL!	#NULL!	1	0	#NULL!	#NULL!	#NULL!	#NULL!		#NULL!	#NULL!	#NULL!	#NULL!
2019-03-12 10:01:53	250	2019-03-12	Pretty good.	1	#NULL!	#NULL!	#NULL!	#NULL!	#NULL!	#NULL!	#NULL!	#NULL!		0	#NULL!	#NULL!	#NULL!	#NULL!	#NULL!	#NULL!	#NULL!	#NULL!	#NULL!	#NULL!	#NULL!	#NULL!	#NULL!	#NULL!	#NULL!	#NULL!	#NULL!	#NULL!	#NULL!	#NULL!	#NULL!	#NULL!	#NULL!	#NULL!	1	0	#NULL!	#NULL!	#NULL!	#NULL!		#NULL!	#NULL!	#NULL!	#NULL!
2019-03-18 10:33:05	250	2019-03-18	Fine	#NULL!	#NULL!	#NULL!	1	#NULL!	#NULL!	#NULL!	#NULL!	#NULL!		0	#NULL!	#NULL!	#NULL!	#NULL!	#NULL!	#NULL!	#NULL!	#NULL!	#NULL!	#NULL!	#NULL!	#NULL!	#NULL!	#NULL!	#NULL!	#NULL!	#NULL!	#NULL!	#NULL!	#NULL!	#NULL!	#NULL!	#NULL!	#NULL!	1	0	#NULL!	#NULL!	#NULL!	#NULL!		#NULL!	#NULL!	#NULL!	#NULL!
2018-11-05 15:22:16	251	2018-11-05	good, except sore throat	1	#NULL!	#NULL!	#NULL!	#NULL!	#NULL!	#NULL!	#NULL!	#NULL!		0	#NULL!	#NULL!	#NULL!	#NULL!	#NULL!	#NULL!	#NULL!	#NULL!	#NULL!	#NULL!	#NULL!	#NULL!	#NULL!	#NULL!	#NULL!	#NULL!	#NULL!	#NULL!	#NULL!	#NULL!	#NULL!	#NULL!	#NULL!	#NULL!	1	5	#NULL!	#NULL!	#NULL!	#NULL!		1	1	1	1
2018-11-14 12:49:30	251	2018-11-14	tingling and pain	1	#NULL!	#NULL!	#NULL!	#NULL!	#NULL!	#NULL!	#NULL!	#NULL!		#NULL!	#NULL!	#NULL!	#NULL!	#NULL!	#NULL!	#NULL!	#NULL!	#NULL!	#NULL!	#NULL!	#NULL!	#NULL!	#NULL!	#NULL!	#NULL!	#NULL!	#NULL!	#NULL!	#NULL!	#NULL!	#NULL!	#NULL!	#NULL!	#NULL!	1	5	#NULL!	#NULL!	#NULL!	#NULL!		2	3	3	2
2018-11-20 19:33:51	251	2018-11-20	Good	1	#NULL!	#NULL!	#NULL!	#NULL!	#NULL!	#NULL!	#NULL!	#NULL!		#NULL!	#NULL!	#NULL!	#NULL!	#NULL!	#NULL!	#NULL!	#NULL!	#NULL!	#NULL!	#NULL!	#NULL!	#NULL!	#NULL!	#NULL!	#NULL!	#NULL!	#NULL!	#NULL!	#NULL!	#NULL!	#NULL!	#NULL!	#NULL!	#NULL!	1	3	#NULL!	#NULL!	#NULL!	#NULL!		1	1	1	1
2019-01-23 21:45:30	251	2019-01-23	Good	1	#NULL!	#NULL!	#NULL!	#NULL!	#NULL!	#NULL!	#NULL!	#NULL!		#NULL!	#NULL!	#NULL!	#NULL!	#NULL!	#NULL!	#NULL!	#NULL!	#NULL!	#NULL!	#NULL!	#NULL!	#NULL!	#NULL!	#NULL!	#NULL!	#NULL!	#NULL!	#NULL!	#NULL!	#NULL!	#NULL!	#NULL!	#NULL!	#NULL!	1	1	#NULL!	#NULL!	#NULL!	#NULL!		1	1	1	1
2019-01-30 14:19:52	251	2019-01-30	Good	1	#NULL!	#NULL!	#NULL!	#NULL!	#NULL!	#NULL!	#NULL!	#NULL!		#NULL!	#NULL!	#NULL!	#NULL!	#NULL!	#NULL!	#NULL!	#NULL!	#NULL!	#NULL!	#NULL!	#NULL!	#NULL!	#NULL!	#NULL!	#NULL!	#NULL!	#NULL!	#NULL!	#NULL!	#NULL!	#NULL!	#NULL!	#NULL!	#NULL!	1	1	#NULL!	#NULL!	#NULL!	#NULL!		1	1	1	1
2019-02-13 15:47:25	251	2019-02-13	Good	1	#NULL!	#NULL!	#NULL!	#NULL!	#NULL!	#NULL!	#NULL!	#NULL!		#NULL!	#NULL!	#NULL!	#NULL!	#NULL!	#NULL!	#NULL!	#NULL!	#NULL!	#NULL!	#NULL!	#NULL!	#NULL!	#NULL!	#NULL!	#NULL!	#NULL!	#NULL!	#NULL!	#NULL!	#NULL!	#NULL!	#NULL!	#NULL!	#NULL!	1	1	#NULL!	#NULL!	#NULL!	#NULL!		1	1	1	1
2019-02-26 15:06:47	251	2019-02-26	Good	1	#NULL!	#NULL!	#NULL!	#NULL!	#NULL!	#NULL!	#NULL!	#NULL!		0	#NULL!	#NULL!	#NULL!	#NULL!	#NULL!	#NULL!	#NULL!	#NULL!	#NULL!	#NULL!	#NULL!	#NULL!	#NULL!	#NULL!	#NULL!	#NULL!	#NULL!	#NULL!	#NULL!	#NULL!	#NULL!	#NULL!	#NULL!	#NULL!	1	2	#NULL!	#NULL!	#NULL!	#NULL!		2	1	1	1
2019-03-12 08:59:39	251	2019-03-12	Good	1	#NULL!	#NULL!	#NULL!	#NULL!	#NULL!	#NULL!	#NULL!	#NULL!		0	#NULL!	#NULL!	#NULL!	#NULL!	#NULL!	#NULL!	#NULL!	#NULL!	#NULL!	#NULL!	#NULL!	#NULL!	#NULL!	#NULL!	#NULL!	#NULL!	#NULL!	#NULL!	#NULL!	#NULL!	#NULL!	#NULL!	#NULL!	#NULL!	1	1	#NULL!	#NULL!	#NULL!	#NULL!		1	1	1	1
2019-03-18 18:24:59	251	2019-03-18	Good	1	#NULL!	#NULL!	#NULL!	#NULL!	#NULL!	#NULL!	#NULL!	#NULL!		0	#NULL!	#NULL!	#NULL!	#NULL!	#NULL!	#NULL!	#NULL!	#NULL!	#NULL!	#NULL!	#NULL!	#NULL!	#NULL!	#NULL!	#NULL!	#NULL!	#NULL!	#NULL!	#NULL!	#NULL!	#NULL!	#NULL!	#NULL!	#NULL!	1	1	#NULL!	#NULL!	#NULL!	#NULL!		1	1	1	1
2019-03-28 09:05:57	251	2019-03-28	Good	1	#NULL!	#NULL!	#NULL!	#NULL!	#NULL!	#NULL!	#NULL!	#NULL!		0	#NULL!	#NULL!	#NULL!	#NULL!	#NULL!	#NULL!	#NULL!	#NULL!	#NULL!	#NULL!	#NULL!	#NULL!	#NULL!	#NULL!	#NULL!	#NULL!	#NULL!	#NULL!	#NULL!	#NULL!	#NULL!	#NULL!	#NULL!	#NULL!	1	1	#NULL!	#NULL!	#NULL!	#NULL!		1	1	1	1
2019-04-12 20:25:40	251	2019-04-12	good	1	#NULL!	#NULL!	#NULL!	#NULL!	#NULL!	#NULL!	#NULL!	#NULL!		0	#NULL!	#NULL!	#NULL!	#NULL!	#NULL!	#NULL!	#NULL!	#NULL!	#NULL!	#NULL!	#NULL!	#NULL!	#NULL!	#NULL!	#NULL!	#NULL!	#NULL!	#NULL!	#NULL!	#NULL!	#NULL!	#NULL!	#NULL!	#NULL!	1	0	#NULL!	#NULL!	#NULL!	#NULL!		#NULL!	#NULL!	#NULL!	#NULL!
2019-04-17 13:52:01	251	2019-04-17	Good	1	#NULL!	#NULL!	#NULL!	#NULL!	#NULL!	#NULL!	#NULL!	#NULL!		0	#NULL!	#NULL!	#NULL!	#NULL!	#NULL!	#NULL!	#NULL!	#NULL!	#NULL!	#NULL!	#NULL!	#NULL!	#NULL!	#NULL!	#NULL!	#NULL!	#NULL!	#NULL!	#NULL!	#NULL!	#NULL!	#NULL!	#NULL!	#NULL!	1	1	#NULL!	#NULL!	#NULL!	#NULL!		1	1	1	1
2019-04-29 09:05:14	251	2019-04-29	Good	1	#NULL!	#NULL!	#NULL!	#NULL!	#NULL!	#NULL!	#NULL!	#NULL!		0	#NULL!	#NULL!	#NULL!	#NULL!	#NULL!	#NULL!	#NULL!	#NULL!	#NULL!	#NULL!	#NULL!	#NULL!	#NULL!	#NULL!	#NULL!	#NULL!	#NULL!	#NULL!	#NULL!	#NULL!	#NULL!	#NULL!	#NULL!	#NULL!	1	0	#NULL!	#NULL!	#NULL!	#NULL!		#NULL!	#NULL!	#NULL!	#NULL!
2019-05-17 08:36:43	251	2019-05-17	Good	1	#NULL!	#NULL!	#NULL!	#NULL!	#NULL!	#NULL!	#NULL!	#NULL!		0	#NULL!	#NULL!	#NULL!	#NULL!	#NULL!	#NULL!	#NULL!	#NULL!	#NULL!	#NULL!	#NULL!	#NULL!	#NULL!	#NULL!	#NULL!	#NULL!	#NULL!	#NULL!	#NULL!	#NULL!	#NULL!	#NULL!	#NULL!	#NULL!	1	1	#NULL!	#NULL!	#NULL!	#NULL!		1	1	1	1
2019-06-17 11:17:08	251	2019-06-17	Good	1	#NULL!	#NULL!	#NULL!	#NULL!	#NULL!	#NULL!	#NULL!	#NULL!		0	#NULL!	#NULL!	#NULL!	#NULL!	#NULL!	#NULL!	#NULL!	#NULL!	#NULL!	#NULL!	#NULL!	#NULL!	#NULL!	#NULL!	#NULL!	#NULL!	#NULL!	#NULL!	#NULL!	#NULL!	#NULL!	#NULL!	#NULL!	#NULL!	1	1	#NULL!	#NULL!	#NULL!	#NULL!		1	1	1	1
2019-06-27 13:39:26	251	2019-06-27	Good	1	#NULL!	#NULL!	#NULL!	#NULL!	#NULL!	#NULL!	#NULL!	#NULL!		0	#NULL!	#NULL!	#NULL!	#NULL!	#NULL!	#NULL!	#NULL!	#NULL!	#NULL!	#NULL!	#NULL!	#NULL!	#NULL!	#NULL!	#NULL!	#NULL!	#NULL!	#NULL!	#NULL!	#NULL!	#NULL!	#NULL!	#NULL!	#NULL!	1	1	#NULL!	#NULL!	#NULL!	#NULL!		1	1	1	1
2019-08-14 09:52:24	251	2019-08-14	Really Good	1	#NULL!	#NULL!	#NULL!	#NULL!	#NULL!	#NULL!	#NULL!	#NULL!		0	#NULL!	#NULL!	#NULL!	#NULL!	#NULL!	#NULL!	#NULL!	#NULL!	#NULL!	#NULL!	#NULL!	#NULL!	#NULL!	#NULL!	#NULL!	#NULL!	#NULL!	#NULL!	#NULL!	#NULL!	#NULL!	#NULL!	#NULL!	#NULL!	1	1	#NULL!	#NULL!	#NULL!	#NULL!		1	1	1	1
2019-08-21 10:09:35	251	2019-08-21	Good	1	#NULL!	#NULL!	#NULL!	#NULL!	#NULL!	#NULL!	#NULL!	#NULL!		0	#NULL!	#NULL!	#NULL!	#NULL!	#NULL!	#NULL!	#NULL!	#NULL!	#NULL!	#NULL!	#NULL!	#NULL!	#NULL!	#NULL!	#NULL!	#NULL!	#NULL!	#NULL!	#NULL!	#NULL!	#NULL!	#NULL!	#NULL!	#NULL!	1	1	#NULL!	#NULL!	#NULL!	#NULL!		1	1	1	1
2019-09-19 18:20:40	251	2019-09-19	very good	1	#NULL!	#NULL!	#NULL!	#NULL!	#NULL!	#NULL!	#NULL!	#NULL!		0	#NULL!	#NULL!	#NULL!	#NULL!	#NULL!	#NULL!	#NULL!	#NULL!	#NULL!	#NULL!	#NULL!	#NULL!	#NULL!	#NULL!	#NULL!	#NULL!	#NULL!	#NULL!	#NULL!	#NULL!	#NULL!	#NULL!	#NULL!	#NULL!	1	1	#NULL!	#NULL!	#NULL!	#NULL!		1	1	1	1
2019-10-08 16:12:16	251	2019-10-08	Good	1	#NULL!	#NULL!	#NULL!	#NULL!	#NULL!	#NULL!	#NULL!	#NULL!		0	#NULL!	#NULL!	#NULL!	#NULL!	#NULL!	#NULL!	#NULL!	#NULL!	#NULL!	#NULL!	#NULL!	#NULL!	#NULL!	#NULL!	#NULL!	#NULL!	#NULL!	#NULL!	#NULL!	#NULL!	#NULL!	#NULL!	#NULL!	#NULL!	1	1	#NULL!	#NULL!	#NULL!	#NULL!		1	1	1	1
2019-10-17 19:01:11	251	2019-10-17	good	1	#NULL!	#NULL!	#NULL!	#NULL!	#NULL!	#NULL!	#NULL!	#NULL!		0	#NULL!	#NULL!	#NULL!	#NULL!	#NULL!	#NULL!	#NULL!	#NULL!	#NULL!	#NULL!	#NULL!	#NULL!	#NULL!	#NULL!	#NULL!	#NULL!	#NULL!	#NULL!	#NULL!	#NULL!	#NULL!	#NULL!	#NULL!	#NULL!	1	1	#NULL!	#NULL!	#NULL!	#NULL!		1	1	1	1
2019-10-29 10:24:21	251	2019-10-29	Good	1	#NULL!	#NULL!	#NULL!	#NULL!	#NULL!	#NULL!	#NULL!	#NULL!		0	#NULL!	#NULL!	#NULL!	#NULL!	#NULL!	#NULL!	#NULL!	#NULL!	#NULL!	#NULL!	#NULL!	#NULL!	#NULL!	#NULL!	#NULL!	#NULL!	#NULL!	#NULL!	#NULL!	#NULL!	#NULL!	#NULL!	#NULL!	#NULL!	1	1	#NULL!	#NULL!	#NULL!	#NULL!		1	1	1	1
2018-11-09 12:42:59	252	2018-11-09	Good	1	#NULL!	#NULL!	#NULL!	#NULL!	#NULL!	#NULL!	#NULL!	#NULL!		#NULL!	#NULL!	#NULL!	#NULL!	#NULL!	#NULL!	#NULL!	#NULL!	#NULL!	#NULL!	#NULL!	#NULL!	#NULL!	#NULL!	#NULL!	#NULL!	#NULL!	#NULL!	#NULL!	#NULL!	#NULL!	#NULL!	#NULL!	#NULL!	#NULL!	1	0	#NULL!	#NULL!	#NULL!	#NULL!		#NULL!	#NULL!	#NULL!	#NULL!
2018-11-12 14:02:32	252	2018-11-12	Good	1	#NULL!	#NULL!	#NULL!	#NULL!	#NULL!	#NULL!	#NULL!	#NULL!		#NULL!	#NULL!	#NULL!	#NULL!	#NULL!	#NULL!	#NULL!	#NULL!	#NULL!	#NULL!	#NULL!	#NULL!	#NULL!	#NULL!	#NULL!	#NULL!	#NULL!	#NULL!	#NULL!	#NULL!	#NULL!	#NULL!	#NULL!	#NULL!	#NULL!	1	0	#NULL!	#NULL!	#NULL!	#NULL!		#NULL!	#NULL!	#NULL!	#NULL!
2018-11-19 20:27:28	252	2018-11-19	Good	1	#NULL!	#NULL!	#NULL!	#NULL!	#NULL!	#NULL!	#NULL!	#NULL!		#NULL!	#NULL!	#NULL!	#NULL!	#NULL!	#NULL!	#NULL!	#NULL!	#NULL!	#NULL!	#NULL!	#NULL!	#NULL!	#NULL!	#NULL!	#NULL!	#NULL!	#NULL!	#NULL!	#NULL!	#NULL!	#NULL!	#NULL!	#NULL!	#NULL!	1	0	#NULL!	#NULL!	#NULL!	#NULL!		#NULL!	#NULL!	#NULL!	#NULL!
2018-11-26 14:26:51	252	2018-11-26	Good	1	#NULL!	#NULL!	#NULL!	#NULL!	#NULL!	#NULL!	#NULL!	#NULL!		#NULL!	#NULL!	#NULL!	#NULL!	#NULL!	#NULL!	#NULL!	#NULL!	#NULL!	#NULL!	#NULL!	#NULL!	#NULL!	#NULL!	#NULL!	#NULL!	#NULL!	#NULL!	#NULL!	#NULL!	#NULL!	#NULL!	#NULL!	#NULL!	#NULL!	1	0	#NULL!	#NULL!	#NULL!	#NULL!		#NULL!	#NULL!	#NULL!	#NULL!
2018-12-10 21:46:50	252	2018-12-10	Good	1	#NULL!	#NULL!	#NULL!	#NULL!	#NULL!	#NULL!	#NULL!	#NULL!		#NULL!	#NULL!	#NULL!	#NULL!	#NULL!	#NULL!	#NULL!	#NULL!	#NULL!	#NULL!	#NULL!	#NULL!	#NULL!	#NULL!	#NULL!	#NULL!	#NULL!	#NULL!	#NULL!	#NULL!	#NULL!	#NULL!	#NULL!	#NULL!	#NULL!	1	0	#NULL!	#NULL!	#NULL!	#NULL!		#NULL!	#NULL!	#NULL!	#NULL!
2018-12-17 13:01:19	252	2018-12-17	Good	1	#NULL!	#NULL!	#NULL!	#NULL!	#NULL!	#NULL!	#NULL!	#NULL!		#NULL!	#NULL!	#NULL!	#NULL!	#NULL!	#NULL!	#NULL!	#NULL!	#NULL!	#NULL!	#NULL!	#NULL!	#NULL!	#NULL!	#NULL!	#NULL!	#NULL!	#NULL!	#NULL!	#NULL!	#NULL!	#NULL!	#NULL!	#NULL!	#NULL!	1	0	#NULL!	#NULL!	#NULL!	#NULL!		#NULL!	#NULL!	#NULL!	#NULL!
2019-01-07 11:09:48	252	2019-01-07	Good	#NULL!	#NULL!	#NULL!	1	#NULL!	#NULL!	#NULL!	#NULL!	#NULL!		#NULL!	#NULL!	#NULL!	#NULL!	#NULL!	#NULL!	#NULL!	#NULL!	#NULL!	#NULL!	#NULL!	#NULL!	#NULL!	#NULL!	#NULL!	#NULL!	#NULL!	#NULL!	#NULL!	#NULL!	#NULL!	#NULL!	#NULL!	#NULL!	#NULL!	1	0	#NULL!	#NULL!	#NULL!	#NULL!		#NULL!	#NULL!	#NULL!	#NULL!
2018-11-14 13:04:56	253	2018-11-14	a lot of pain, vomiting, nauseous, light-headed	1	#NULL!	#NULL!	#NULL!	#NULL!	#NULL!	#NULL!	#NULL!	#NULL!		#NULL!	#NULL!	#NULL!	#NULL!	#NULL!	#NULL!	#NULL!	#NULL!	#NULL!	#NULL!	#NULL!	#NULL!	#NULL!	#NULL!	#NULL!	#NULL!	#NULL!	#NULL!	#NULL!	#NULL!	#NULL!	#NULL!	#NULL!	#NULL!	#NULL!	2	8	#NULL!	#NULL!	#NULL!	#NULL!		4	4	4	4
2019-03-01 12:03:04	253	2019-03-01	OK--really nauseated this week and had pain in my breast where they did the radiation	#NULL!	#NULL!	#NULL!	1	#NULL!	#NULL!	#NULL!	#NULL!	#NULL!		0	#NULL!	#NULL!	#NULL!	#NULL!	#NULL!	#NULL!	#NULL!	#NULL!	#NULL!	#NULL!	#NULL!	#NULL!	#NULL!	#NULL!	#NULL!	#NULL!	#NULL!	#NULL!	#NULL!	#NULL!	#NULL!	#NULL!	#NULL!	#NULL!	1	5	#NULL!	#NULL!	#NULL!	#NULL!		2	2	2	2
2019-03-29 11:05:41	253	2019-03-29	"my arthritis has really got me down"	#NULL!	#NULL!	#NULL!	1	#NULL!	#NULL!	#NULL!	#NULL!	#NULL!		0	#NULL!	#NULL!	#NULL!	#NULL!	#NULL!	#NULL!	#NULL!	#NULL!	#NULL!	#NULL!	#NULL!	#NULL!	#NULL!	#NULL!	#NULL!	#NULL!	#NULL!	#NULL!	#NULL!	#NULL!	#NULL!	#NULL!	#NULL!	#NULL!	1	6	#NULL!	#NULL!	#NULL!	#NULL!		4	4	4	4
2018-11-26 15:44:01	254	2018-11-26	great	1	#NULL!	#NULL!	#NULL!	#NULL!	#NULL!	#NULL!	#NULL!	#NULL!		#NULL!	#NULL!	#NULL!	#NULL!	#NULL!	#NULL!	#NULL!	#NULL!	#NULL!	#NULL!	#NULL!	#NULL!	#NULL!	#NULL!	#NULL!	#NULL!	#NULL!	#NULL!	#NULL!	#NULL!	#NULL!	#NULL!	#NULL!	#NULL!	#NULL!	1	0	#NULL!	#NULL!	#NULL!	#NULL!		#NULL!	#NULL!	#NULL!	#NULL!
2018-12-12 10:55:47	254	2018-12-12	great	1	#NULL!	#NULL!	#NULL!	#NULL!	#NULL!	#NULL!	#NULL!	#NULL!		#NULL!	#NULL!	#NULL!	#NULL!	#NULL!	#NULL!	#NULL!	#NULL!	#NULL!	#NULL!	#NULL!	#NULL!	#NULL!	#NULL!	#NULL!	#NULL!	#NULL!	#NULL!	#NULL!	#NULL!	#NULL!	#NULL!	#NULL!	#NULL!	#NULL!	1	0	#NULL!	#NULL!	#NULL!	#NULL!		#NULL!	#NULL!	#NULL!	#NULL!
2018-12-19 11:28:31	254	2018-12-19	fine	1	#NULL!	#NULL!	#NULL!	#NULL!	#NULL!	#NULL!	#NULL!	#NULL!		#NULL!	#NULL!	#NULL!	#NULL!	#NULL!	#NULL!	#NULL!	#NULL!	#NULL!	#NULL!	#NULL!	#NULL!	#NULL!	#NULL!	#NULL!	#NULL!	#NULL!	#NULL!	#NULL!	#NULL!	#NULL!	#NULL!	#NULL!	#NULL!	#NULL!	1	0	#NULL!	#NULL!	#NULL!	#NULL!		#NULL!	#NULL!	#NULL!	#NULL!
2018-11-14 13:35:09	255	2018-11-14	pretty good	1	#NULL!	#NULL!	#NULL!	#NULL!	#NULL!	#NULL!	#NULL!	#NULL!		#NULL!	#NULL!	#NULL!	#NULL!	#NULL!	#NULL!	#NULL!	#NULL!	#NULL!	#NULL!	#NULL!	#NULL!	#NULL!	#NULL!	#NULL!	#NULL!	#NULL!	#NULL!	#NULL!	#NULL!	#NULL!	#NULL!	#NULL!	#NULL!	#NULL!	1	1	#NULL!	#NULL!	#NULL!	#NULL!		1	2	2	2
2018-11-26 16:12:07	255	2018-11-26	good	1	#NULL!	#NULL!	#NULL!	#NULL!	#NULL!	#NULL!	#NULL!	#NULL!		#NULL!	#NULL!	#NULL!	#NULL!	#NULL!	#NULL!	#NULL!	#NULL!	#NULL!	#NULL!	#NULL!	#NULL!	#NULL!	#NULL!	#NULL!	#NULL!	#NULL!	#NULL!	#NULL!	#NULL!	#NULL!	#NULL!	#NULL!	#NULL!	#NULL!	1	0	#NULL!	#NULL!	#NULL!	#NULL!		#NULL!	#NULL!	#NULL!	#NULL!
2018-12-12 11:16:04	255	2018-12-12	good, trying to make it through waiting for treatment decisions	1	#NULL!	#NULL!	#NULL!	#NULL!	#NULL!	#NULL!	#NULL!	#NULL!		#NULL!	#NULL!	#NULL!	#NULL!	#NULL!	#NULL!	#NULL!	#NULL!	#NULL!	#NULL!	#NULL!	#NULL!	#NULL!	#NULL!	#NULL!	#NULL!	#NULL!	#NULL!	#NULL!	#NULL!	#NULL!	#NULL!	#NULL!	#NULL!	#NULL!	1	0	#NULL!	#NULL!	#NULL!	#NULL!		#NULL!	#NULL!	#NULL!	#NULL!
2018-11-15 15:17:28	256	2018-11-15	really good	1	#NULL!	#NULL!	#NULL!	#NULL!	#NULL!	#NULL!	#NULL!	#NULL!		#NULL!	#NULL!	#NULL!	#NULL!	#NULL!	#NULL!	#NULL!	#NULL!	#NULL!	#NULL!	#NULL!	#NULL!	#NULL!	#NULL!	#NULL!	#NULL!	#NULL!	#NULL!	#NULL!	#NULL!	#NULL!	#NULL!	#NULL!	#NULL!	#NULL!	1	1	#NULL!	#NULL!	#NULL!	#NULL!		2	2	2	2
2018-11-28 11:38:17	256	2018-11-28	Great, no change, feeling great.	1	#NULL!	#NULL!	#NULL!	#NULL!	#NULL!	#NULL!	#NULL!	#NULL!		#NULL!	#NULL!	#NULL!	#NULL!	#NULL!	#NULL!	#NULL!	#NULL!	#NULL!	#NULL!	#NULL!	#NULL!	#NULL!	#NULL!	#NULL!	#NULL!	#NULL!	#NULL!	#NULL!	#NULL!	#NULL!	#NULL!	#NULL!	#NULL!	#NULL!	1	0	#NULL!	#NULL!	#NULL!	#NULL!		#NULL!	#NULL!	#NULL!	#NULL!
2019-02-12 11:06:46	256	2019-02-12	ok--skin rash	1	#NULL!	#NULL!	#NULL!	#NULL!	#NULL!	#NULL!	#NULL!	#NULL!		#NULL!	#NULL!	#NULL!	#NULL!	#NULL!	#NULL!	#NULL!	#NULL!	#NULL!	#NULL!	#NULL!	#NULL!	#NULL!	#NULL!	#NULL!	#NULL!	#NULL!	#NULL!	#NULL!	#NULL!	#NULL!	#NULL!	#NULL!	#NULL!	#NULL!	1	0	#NULL!	#NULL!	#NULL!	#NULL!		#NULL!	#NULL!	#NULL!	#NULL!
2019-02-22 09:17:43	256	2019-02-22	ok	1	#NULL!	#NULL!	#NULL!	#NULL!	#NULL!	#NULL!	#NULL!	#NULL!		#NULL!	#NULL!	#NULL!	#NULL!	#NULL!	#NULL!	#NULL!	#NULL!	#NULL!	#NULL!	#NULL!	#NULL!	#NULL!	#NULL!	#NULL!	#NULL!	#NULL!	#NULL!	#NULL!	#NULL!	#NULL!	#NULL!	#NULL!	#NULL!	#NULL!	1	2	#NULL!	#NULL!	#NULL!	#NULL!		1	1	1	1
2019-02-26 10:29:16	256	2019-02-26	"better every day"	1	#NULL!	#NULL!	#NULL!	#NULL!	#NULL!	#NULL!	#NULL!	#NULL!		0	#NULL!	#NULL!	#NULL!	#NULL!	#NULL!	#NULL!	#NULL!	#NULL!	#NULL!	#NULL!	#NULL!	#NULL!	#NULL!	#NULL!	#NULL!	#NULL!	#NULL!	#NULL!	#NULL!	#NULL!	#NULL!	#NULL!	#NULL!	#NULL!	1	0	#NULL!	#NULL!	#NULL!	#NULL!		#NULL!	#NULL!	#NULL!	#NULL!
2018-11-19 10:24:44	257	2018-11-19	good	1	#NULL!	#NULL!	#NULL!	#NULL!	#NULL!	#NULL!	#NULL!	#NULL!		#NULL!	#NULL!	#NULL!	#NULL!	#NULL!	#NULL!	#NULL!	#NULL!	#NULL!	#NULL!	#NULL!	#NULL!	#NULL!	#NULL!	#NULL!	#NULL!	#NULL!	#NULL!	#NULL!	#NULL!	#NULL!	#NULL!	#NULL!	#NULL!	#NULL!	1	6	#NULL!	#NULL!	#NULL!	#NULL!		1	1	1	1
2018-11-28 11:29:31	257	2018-11-28	pretty good	1	#NULL!	#NULL!	#NULL!	#NULL!	#NULL!	#NULL!	#NULL!	#NULL!		#NULL!	#NULL!	#NULL!	#NULL!	#NULL!	#NULL!	#NULL!	#NULL!	#NULL!	#NULL!	#NULL!	#NULL!	#NULL!	#NULL!	#NULL!	#NULL!	#NULL!	#NULL!	#NULL!	#NULL!	#NULL!	#NULL!	#NULL!	#NULL!	#NULL!	1	2	#NULL!	#NULL!	#NULL!	#NULL!		3	3	4	4
2018-12-14 11:32:10	257	2018-12-14	better, infection almost gone	1	#NULL!	#NULL!	#NULL!	#NULL!	#NULL!	#NULL!	#NULL!	#NULL!		#NULL!	#NULL!	#NULL!	#NULL!	#NULL!	#NULL!	#NULL!	#NULL!	#NULL!	#NULL!	#NULL!	#NULL!	#NULL!	#NULL!	#NULL!	#NULL!	#NULL!	#NULL!	#NULL!	#NULL!	#NULL!	#NULL!	#NULL!	#NULL!	#NULL!	1	3	#NULL!	#NULL!	#NULL!	#NULL!		4	4	1	4
2018-12-19 11:58:47	257	2018-12-19	good	1	#NULL!	#NULL!	#NULL!	#NULL!	#NULL!	#NULL!	#NULL!	#NULL!		#NULL!	#NULL!	#NULL!	#NULL!	#NULL!	#NULL!	#NULL!	#NULL!	#NULL!	#NULL!	#NULL!	#NULL!	#NULL!	#NULL!	#NULL!	#NULL!	#NULL!	#NULL!	#NULL!	#NULL!	#NULL!	#NULL!	#NULL!	#NULL!	#NULL!	1	0	#NULL!	#NULL!	#NULL!	#NULL!		#NULL!	#NULL!	#NULL!	#NULL!
2019-01-25 14:48:45	257	2019-01-25	really well	#NULL!	#NULL!	1	#NULL!	#NULL!	#NULL!	#NULL!	#NULL!	#NULL!		0	#NULL!	#NULL!	#NULL!	#NULL!	#NULL!	#NULL!	#NULL!	#NULL!	#NULL!	#NULL!	#NULL!	#NULL!	#NULL!	#NULL!	#NULL!	#NULL!	#NULL!	#NULL!	#NULL!	#NULL!	#NULL!	#NULL!	#NULL!	#NULL!	1	0	#NULL!	#NULL!	#NULL!	#NULL!		#NULL!	#NULL!	#NULL!	#NULL!
2019-02-01 10:50:07	257	2019-02-01	doing well	#NULL!	#NULL!	1	#NULL!	#NULL!	#NULL!	#NULL!	#NULL!	#NULL!		1	1	1	1	1	1	1	1	1	1	1	1	1	2	2	2	2	2	3	4	4	3	3	3	3	1	0	#NULL!	#NULL!	#NULL!	#NULL!		#NULL!	#NULL!	#NULL!	#NULL!
2019-02-13 15:24:11	257	2019-02-13	tired very fatigued	#NULL!	#NULL!	1	#NULL!	#NULL!	#NULL!	#NULL!	#NULL!	#NULL!		0	#NULL!	#NULL!	#NULL!	#NULL!	#NULL!	#NULL!	#NULL!	#NULL!	#NULL!	#NULL!	#NULL!	#NULL!	#NULL!	#NULL!	#NULL!	#NULL!	#NULL!	#NULL!	#NULL!	#NULL!	#NULL!	#NULL!	#NULL!	#NULL!	1	3	#NULL!	#NULL!	#NULL!	#NULL!		2	2	1	2
2019-02-22 09:33:27	257	2019-02-22	well	#NULL!	#NULL!	1	#NULL!	#NULL!	#NULL!	#NULL!	#NULL!	#NULL!		0	#NULL!	#NULL!	#NULL!	#NULL!	#NULL!	#NULL!	#NULL!	#NULL!	#NULL!	#NULL!	#NULL!	#NULL!	#NULL!	#NULL!	#NULL!	#NULL!	#NULL!	#NULL!	#NULL!	#NULL!	#NULL!	#NULL!	#NULL!	#NULL!	1	0	#NULL!	#NULL!	#NULL!	#NULL!		#NULL!	#NULL!	#NULL!	#NULL!
2019-03-01 10:50:13	257	2019-03-01	ok	#NULL!	#NULL!	1	#NULL!	#NULL!	#NULL!	#NULL!	#NULL!	#NULL!		0	#NULL!	#NULL!	#NULL!	#NULL!	#NULL!	#NULL!	#NULL!	#NULL!	#NULL!	#NULL!	#NULL!	#NULL!	#NULL!	#NULL!	#NULL!	#NULL!	#NULL!	#NULL!	#NULL!	#NULL!	#NULL!	#NULL!	#NULL!	#NULL!	1	6	#NULL!	#NULL!	#NULL!	#NULL!		3	3	3	3
2019-03-14 20:16:43	257	#NULL!	Good	#NULL!	#NULL!	1	#NULL!	#NULL!	#NULL!	#NULL!	#NULL!	#NULL!		0	#NULL!	#NULL!	#NULL!	#NULL!	#NULL!	#NULL!	#NULL!	#NULL!	#NULL!	#NULL!	#NULL!	#NULL!	#NULL!	#NULL!	#NULL!	#NULL!	#NULL!	#NULL!	#NULL!	#NULL!	#NULL!	#NULL!	#NULL!	#NULL!	1	0	#NULL!	#NULL!	#NULL!	#NULL!		#NULL!	#NULL!	#NULL!	#NULL!
2019-03-18 11:44:49	257	2019-03-18	Not so good	#NULL!	#NULL!	1	#NULL!	#NULL!	#NULL!	#NULL!	#NULL!	#NULL!		1	2	1	1	1	1	1	1	1	2	2	1	1	4	4	4	4	3	3	3	2	2	2	2	2	1	1	#NULL!	#NULL!	#NULL!	#NULL!		1	1	1	1
2019-03-25 16:13:54	257	2019-02-25	Ok	#NULL!	#NULL!	1	#NULL!	#NULL!	#NULL!	#NULL!	#NULL!	#NULL!		0	#NULL!	#NULL!	#NULL!	#NULL!	#NULL!	#NULL!	#NULL!	#NULL!	#NULL!	#NULL!	#NULL!	#NULL!	#NULL!	#NULL!	#NULL!	#NULL!	#NULL!	#NULL!	#NULL!	#NULL!	#NULL!	#NULL!	#NULL!	#NULL!	1	1	#NULL!	#NULL!	#NULL!	#NULL!		1	1	1	1
2019-04-10 17:46:21	257	#NULL!		#NULL!	#NULL!	1	#NULL!	#NULL!	#NULL!	#NULL!	#NULL!	#NULL!		0	#NULL!	#NULL!	#NULL!	#NULL!	#NULL!	#NULL!	#NULL!	#NULL!	#NULL!	#NULL!	#NULL!	#NULL!	#NULL!	#NULL!	#NULL!	#NULL!	#NULL!	#NULL!	#NULL!	#NULL!	#NULL!	#NULL!	#NULL!	#NULL!	1	0	#NULL!	#NULL!	#NULL!	#NULL!		#NULL!	#NULL!	#NULL!	#NULL!
2019-04-17 15:40:29	257	2019-04-17	Ok maybe the new normal	#NULL!	#NULL!	1	#NULL!	#NULL!	#NULL!	#NULL!	#NULL!	#NULL!		0	#NULL!	#NULL!	#NULL!	#NULL!	#NULL!	#NULL!	#NULL!	#NULL!	#NULL!	#NULL!	#NULL!	#NULL!	#NULL!	#NULL!	#NULL!	#NULL!	#NULL!	#NULL!	#NULL!	#NULL!	#NULL!	#NULL!	#NULL!	#NULL!	1	3	#NULL!	#NULL!	#NULL!	#NULL!		2	2	1	2
2019-04-22 19:10:00	257	2019-04-22	Never very good	#NULL!	#NULL!	1	#NULL!	#NULL!	#NULL!	#NULL!	#NULL!	#NULL!		0	#NULL!	#NULL!	#NULL!	#NULL!	#NULL!	#NULL!	#NULL!	#NULL!	#NULL!	#NULL!	#NULL!	#NULL!	#NULL!	#NULL!	#NULL!	#NULL!	#NULL!	#NULL!	#NULL!	#NULL!	#NULL!	#NULL!	#NULL!	#NULL!	1	2	#NULL!	#NULL!	#NULL!	#NULL!		1	1	1	1
2019-05-14 12:14:10	257	2019-05-14	More sick	#NULL!	#NULL!	1	#NULL!	#NULL!	#NULL!	#NULL!	#NULL!	#NULL!		0	#NULL!	#NULL!	#NULL!	#NULL!	#NULL!	#NULL!	#NULL!	#NULL!	#NULL!	#NULL!	#NULL!	#NULL!	#NULL!	#NULL!	#NULL!	#NULL!	#NULL!	#NULL!	#NULL!	#NULL!	#NULL!	#NULL!	#NULL!	#NULL!	1	3	#NULL!	#NULL!	#NULL!	#NULL!		3	2	2	2
2019-06-11 12:17:13	257	2019-06-11	Good days and bad	#NULL!	#NULL!	1	#NULL!	#NULL!	#NULL!	#NULL!	#NULL!	#NULL!		1	2	1	1	1	1	1	1	2	1	1	2	1	3	4	3	3	3	2	2	1	2	1	2	2	1	1	#NULL!	#NULL!	#NULL!	#NULL!		1	1	1	1
2019-06-17 15:59:04	257	2019-06-17	Exhausted	#NULL!	#NULL!	1	#NULL!	#NULL!	#NULL!	#NULL!	#NULL!	#NULL!		0	#NULL!	#NULL!	#NULL!	#NULL!	#NULL!	#NULL!	#NULL!	#NULL!	#NULL!	#NULL!	#NULL!	#NULL!	#NULL!	#NULL!	#NULL!	#NULL!	#NULL!	#NULL!	#NULL!	#NULL!	#NULL!	#NULL!	#NULL!	#NULL!	1	0	#NULL!	#NULL!	#NULL!	#NULL!		#NULL!	#NULL!	#NULL!	#NULL!
2019-06-26 22:17:54	257	2019-06-26	Ok	1	#NULL!	#NULL!	#NULL!	#NULL!	#NULL!	#NULL!	#NULL!	#NULL!		0	#NULL!	#NULL!	#NULL!	#NULL!	#NULL!	#NULL!	#NULL!	#NULL!	#NULL!	#NULL!	#NULL!	#NULL!	#NULL!	#NULL!	#NULL!	#NULL!	#NULL!	#NULL!	#NULL!	#NULL!	#NULL!	#NULL!	#NULL!	#NULL!	1	0	#NULL!	#NULL!	#NULL!	#NULL!		#NULL!	#NULL!	#NULL!	#NULL!
2019-07-15 14:20:03	257	2019-07-15	Good	1	#NULL!	#NULL!	#NULL!	#NULL!	#NULL!	#NULL!	#NULL!	#NULL!		0	#NULL!	#NULL!	#NULL!	#NULL!	#NULL!	#NULL!	#NULL!	#NULL!	#NULL!	#NULL!	#NULL!	#NULL!	#NULL!	#NULL!	#NULL!	#NULL!	#NULL!	#NULL!	#NULL!	#NULL!	#NULL!	#NULL!	#NULL!	#NULL!	1	0	#NULL!	#NULL!	#NULL!	#NULL!		#NULL!	#NULL!	#NULL!	#NULL!
2019-08-12 12:06:32	257	2019-08-12	Good	1	#NULL!	#NULL!	1	#NULL!	#NULL!	#NULL!	#NULL!	#NULL!		0	#NULL!	#NULL!	#NULL!	#NULL!	#NULL!	#NULL!	#NULL!	#NULL!	#NULL!	#NULL!	#NULL!	#NULL!	#NULL!	#NULL!	#NULL!	#NULL!	#NULL!	#NULL!	#NULL!	#NULL!	#NULL!	#NULL!	#NULL!	#NULL!	1	0	#NULL!	#NULL!	#NULL!	#NULL!		#NULL!	#NULL!	#NULL!	#NULL!
2019-08-22 15:39:46	257	2019-08-22	Good	1	#NULL!	#NULL!	1	#NULL!	#NULL!	#NULL!	#NULL!	#NULL!		0	#NULL!	#NULL!	#NULL!	#NULL!	#NULL!	#NULL!	#NULL!	#NULL!	#NULL!	#NULL!	#NULL!	#NULL!	#NULL!	#NULL!	#NULL!	#NULL!	#NULL!	#NULL!	#NULL!	#NULL!	#NULL!	#NULL!	#NULL!	#NULL!	1	0	#NULL!	#NULL!	#NULL!	#NULL!		#NULL!	#NULL!	#NULL!	#NULL!
2019-08-27 17:40:15	257	2019-08-27	Good	#NULL!	#NULL!	#NULL!	1	#NULL!	#NULL!	#NULL!	#NULL!	#NULL!		0	#NULL!	#NULL!	#NULL!	#NULL!	#NULL!	#NULL!	#NULL!	#NULL!	#NULL!	#NULL!	#NULL!	#NULL!	#NULL!	#NULL!	#NULL!	#NULL!	#NULL!	#NULL!	#NULL!	#NULL!	#NULL!	#NULL!	#NULL!	#NULL!	1	0	#NULL!	#NULL!	#NULL!	#NULL!		#NULL!	#NULL!	#NULL!	#NULL!
2019-09-29 12:09:36	257	2019-09-29	Good. Except for uti	#NULL!	#NULL!	#NULL!	1	#NULL!	#NULL!	#NULL!	#NULL!	#NULL!		0	#NULL!	#NULL!	#NULL!	#NULL!	#NULL!	#NULL!	#NULL!	#NULL!	#NULL!	#NULL!	#NULL!	#NULL!	#NULL!	#NULL!	#NULL!	#NULL!	#NULL!	#NULL!	#NULL!	#NULL!	#NULL!	#NULL!	#NULL!	#NULL!	1	6	#NULL!	#NULL!	#NULL!	#NULL!		4	4	4	4
2019-10-16 12:58:10	257	2019-10-16	Good	#NULL!	#NULL!	#NULL!	1	#NULL!	#NULL!	#NULL!	#NULL!	#NULL!		0	#NULL!	#NULL!	#NULL!	#NULL!	#NULL!	#NULL!	#NULL!	#NULL!	#NULL!	#NULL!	#NULL!	#NULL!	#NULL!	#NULL!	#NULL!	#NULL!	#NULL!	#NULL!	#NULL!	#NULL!	#NULL!	#NULL!	#NULL!	#NULL!	1	0	#NULL!	#NULL!	#NULL!	#NULL!		#NULL!	#NULL!	#NULL!	#NULL!
2019-10-24 16:08:18	257	2019-10-24	Tired	#NULL!	#NULL!	#NULL!	1	#NULL!	#NULL!	#NULL!	#NULL!	#NULL!		1	1	1	2	1	1	1	1	1	1	1	1	1	4	2	3	3	3	2	3	1	1	1	2	2	1	0	#NULL!	#NULL!	#NULL!	#NULL!		#NULL!	#NULL!	#NULL!	#NULL!
2019-11-05 21:42:09	257	2019-11-05	Good	#NULL!	#NULL!	#NULL!	1	#NULL!	#NULL!	#NULL!	#NULL!	#NULL!		0	#NULL!	#NULL!	#NULL!	#NULL!	#NULL!	#NULL!	#NULL!	#NULL!	#NULL!	#NULL!	#NULL!	#NULL!	#NULL!	#NULL!	#NULL!	#NULL!	#NULL!	#NULL!	#NULL!	#NULL!	#NULL!	#NULL!	#NULL!	#NULL!	1	0	#NULL!	#NULL!	#NULL!	#NULL!		#NULL!	#NULL!	#NULL!	#NULL!
2019-11-24 19:29:25	257	2019-11-24	Good	#NULL!	#NULL!	#NULL!	1	#NULL!	#NULL!	#NULL!	#NULL!	#NULL!		0	#NULL!	#NULL!	#NULL!	#NULL!	#NULL!	#NULL!	#NULL!	#NULL!	#NULL!	#NULL!	#NULL!	#NULL!	#NULL!	#NULL!	#NULL!	#NULL!	#NULL!	#NULL!	#NULL!	#NULL!	#NULL!	#NULL!	#NULL!	#NULL!	1	2	#NULL!	#NULL!	#NULL!	#NULL!		2	1	1	1
2018-11-19 10:17:40	258	2018-11-19	well today, less groggy	1	#NULL!	#NULL!	#NULL!	#NULL!	#NULL!	#NULL!	#NULL!	#NULL!		#NULL!	#NULL!	#NULL!	#NULL!	#NULL!	#NULL!	#NULL!	#NULL!	#NULL!	#NULL!	#NULL!	#NULL!	#NULL!	#NULL!	#NULL!	#NULL!	#NULL!	#NULL!	#NULL!	#NULL!	#NULL!	#NULL!	#NULL!	#NULL!	#NULL!	1	3	#NULL!	#NULL!	#NULL!	#NULL!		3	3	3	3
2018-12-12 11:48:23	258	2018-12-12	really good	1	#NULL!	#NULL!	#NULL!	#NULL!	#NULL!	#NULL!	#NULL!	#NULL!		#NULL!	#NULL!	#NULL!	#NULL!	#NULL!	#NULL!	#NULL!	#NULL!	#NULL!	#NULL!	#NULL!	#NULL!	#NULL!	#NULL!	#NULL!	#NULL!	#NULL!	#NULL!	#NULL!	#NULL!	#NULL!	#NULL!	#NULL!	#NULL!	#NULL!	1	0	#NULL!	#NULL!	#NULL!	#NULL!		#NULL!	#NULL!	#NULL!	#NULL!
2018-12-19 12:03:37	258	2018-12-19	good today	1	#NULL!	#NULL!	#NULL!	#NULL!	#NULL!	#NULL!	#NULL!	#NULL!		#NULL!	#NULL!	#NULL!	#NULL!	#NULL!	#NULL!	#NULL!	#NULL!	#NULL!	#NULL!	#NULL!	#NULL!	#NULL!	#NULL!	#NULL!	#NULL!	#NULL!	#NULL!	#NULL!	#NULL!	#NULL!	#NULL!	#NULL!	#NULL!	#NULL!	1	0	#NULL!	#NULL!	#NULL!	#NULL!		#NULL!	#NULL!	#NULL!	#NULL!
2019-01-16 10:53:59	258	2019-01-16	good today	#NULL!	#NULL!	1	#NULL!	#NULL!	#NULL!	#NULL!	#NULL!	#NULL!		0	#NULL!	#NULL!	#NULL!	#NULL!	#NULL!	#NULL!	#NULL!	#NULL!	#NULL!	#NULL!	#NULL!	#NULL!	#NULL!	#NULL!	#NULL!	#NULL!	#NULL!	#NULL!	#NULL!	#NULL!	#NULL!	#NULL!	#NULL!	#NULL!	1	0	#NULL!	#NULL!	#NULL!	#NULL!		#NULL!	#NULL!	#NULL!	#NULL!
2019-02-01 11:02:14	258	2019-02-01	really good	#NULL!	#NULL!	1	#NULL!	#NULL!	#NULL!	#NULL!	#NULL!	#NULL!		0	#NULL!	#NULL!	#NULL!	#NULL!	#NULL!	#NULL!	#NULL!	#NULL!	#NULL!	#NULL!	#NULL!	#NULL!	#NULL!	#NULL!	#NULL!	#NULL!	#NULL!	#NULL!	#NULL!	#NULL!	#NULL!	#NULL!	#NULL!	#NULL!	1	0	#NULL!	#NULL!	#NULL!	#NULL!		#NULL!	#NULL!	#NULL!	#NULL!
2019-02-12 11:14:47	258	2019-02-12	some nausea and vomiting with chemo this week, but fine now	#NULL!	#NULL!	1	#NULL!	#NULL!	#NULL!	#NULL!	#NULL!	#NULL!		0	#NULL!	#NULL!	#NULL!	#NULL!	#NULL!	#NULL!	#NULL!	#NULL!	#NULL!	#NULL!	#NULL!	#NULL!	#NULL!	#NULL!	#NULL!	#NULL!	#NULL!	#NULL!	#NULL!	#NULL!	#NULL!	#NULL!	#NULL!	#NULL!	1	0	#NULL!	#NULL!	#NULL!	#NULL!		#NULL!	#NULL!	#NULL!	#NULL!
2019-02-19 11:45:11	258	2019-02-19	good	#NULL!	#NULL!	1	#NULL!	#NULL!	#NULL!	#NULL!	#NULL!	#NULL!		0	#NULL!	#NULL!	#NULL!	#NULL!	#NULL!	#NULL!	#NULL!	#NULL!	#NULL!	#NULL!	#NULL!	#NULL!	#NULL!	#NULL!	#NULL!	#NULL!	#NULL!	#NULL!	#NULL!	#NULL!	#NULL!	#NULL!	#NULL!	#NULL!	1	0	#NULL!	#NULL!	#NULL!	#NULL!		#NULL!	#NULL!	#NULL!	#NULL!
2019-03-01 12:40:28	258	2019-03-01	good	#NULL!	#NULL!	1	#NULL!	#NULL!	#NULL!	#NULL!	#NULL!	#NULL!		0	#NULL!	#NULL!	#NULL!	#NULL!	#NULL!	#NULL!	#NULL!	#NULL!	#NULL!	#NULL!	#NULL!	#NULL!	#NULL!	#NULL!	#NULL!	#NULL!	#NULL!	#NULL!	#NULL!	#NULL!	#NULL!	#NULL!	#NULL!	#NULL!	1	0	#NULL!	#NULL!	#NULL!	#NULL!		#NULL!	#NULL!	#NULL!	#NULL!
2019-03-18 13:59:11	258	2019-03-18	good	#NULL!	#NULL!	1	#NULL!	#NULL!	#NULL!	#NULL!	#NULL!	#NULL!		0	#NULL!	#NULL!	#NULL!	#NULL!	#NULL!	#NULL!	#NULL!	#NULL!	#NULL!	#NULL!	#NULL!	#NULL!	#NULL!	#NULL!	#NULL!	#NULL!	#NULL!	#NULL!	#NULL!	#NULL!	#NULL!	#NULL!	#NULL!	#NULL!	1	0	#NULL!	#NULL!	#NULL!	#NULL!		#NULL!	#NULL!	#NULL!	#NULL!
2019-03-25 23:43:32	258	2019-03-25	okay other than flu	#NULL!	#NULL!	1	#NULL!	#NULL!	#NULL!	#NULL!	#NULL!	#NULL!		0	#NULL!	#NULL!	#NULL!	#NULL!	#NULL!	#NULL!	#NULL!	#NULL!	#NULL!	#NULL!	#NULL!	#NULL!	#NULL!	#NULL!	#NULL!	#NULL!	#NULL!	#NULL!	#NULL!	#NULL!	#NULL!	#NULL!	#NULL!	#NULL!	1	0	#NULL!	#NULL!	#NULL!	#NULL!		#NULL!	#NULL!	#NULL!	#NULL!
2019-04-17 10:14:34	258	2019-04-17	fine	#NULL!	#NULL!	1	#NULL!	#NULL!	#NULL!	#NULL!	#NULL!	1	every wednsday	0	#NULL!	#NULL!	#NULL!	#NULL!	#NULL!	#NULL!	#NULL!	#NULL!	#NULL!	#NULL!	#NULL!	#NULL!	#NULL!	#NULL!	#NULL!	#NULL!	#NULL!	#NULL!	#NULL!	#NULL!	#NULL!	#NULL!	#NULL!	#NULL!	1	0	#NULL!	#NULL!	#NULL!	#NULL!		#NULL!	#NULL!	#NULL!	#NULL!
2019-04-22 17:40:45	258	2019-04-22	good.	#NULL!	#NULL!	1	#NULL!	#NULL!	#NULL!	#NULL!	#NULL!	#NULL!		0	#NULL!	#NULL!	#NULL!	#NULL!	#NULL!	#NULL!	#NULL!	#NULL!	#NULL!	#NULL!	#NULL!	#NULL!	#NULL!	#NULL!	#NULL!	#NULL!	#NULL!	#NULL!	#NULL!	#NULL!	#NULL!	#NULL!	#NULL!	#NULL!	1	0	#NULL!	#NULL!	#NULL!	#NULL!		#NULL!	#NULL!	#NULL!	#NULL!
2019-05-13 12:52:54	258	2019-05-13	pretty good. cold	#NULL!	#NULL!	1	#NULL!	#NULL!	#NULL!	#NULL!	#NULL!	#NULL!		0	#NULL!	#NULL!	#NULL!	#NULL!	#NULL!	#NULL!	#NULL!	#NULL!	#NULL!	#NULL!	#NULL!	#NULL!	#NULL!	#NULL!	#NULL!	#NULL!	#NULL!	#NULL!	#NULL!	#NULL!	#NULL!	#NULL!	#NULL!	#NULL!	1	0	#NULL!	#NULL!	#NULL!	#NULL!		#NULL!	#NULL!	#NULL!	#NULL!
2019-05-21 11:46:48	258	2019-05-21	fine	#NULL!	#NULL!	1	#NULL!	#NULL!	#NULL!	#NULL!	#NULL!	#NULL!		0	#NULL!	#NULL!	#NULL!	#NULL!	#NULL!	#NULL!	#NULL!	#NULL!	#NULL!	#NULL!	#NULL!	#NULL!	#NULL!	#NULL!	#NULL!	#NULL!	#NULL!	#NULL!	#NULL!	#NULL!	#NULL!	#NULL!	#NULL!	#NULL!	1	0	#NULL!	#NULL!	#NULL!	#NULL!		#NULL!	#NULL!	#NULL!	#NULL!
2019-06-19 14:24:21	258	2019-06-19	GOOD	1	#NULL!	#NULL!	#NULL!	#NULL!	#NULL!	#NULL!	#NULL!	#NULL!		0	#NULL!	#NULL!	#NULL!	#NULL!	#NULL!	#NULL!	#NULL!	#NULL!	#NULL!	#NULL!	#NULL!	#NULL!	#NULL!	#NULL!	#NULL!	#NULL!	#NULL!	#NULL!	#NULL!	#NULL!	#NULL!	#NULL!	#NULL!	#NULL!	1	0	#NULL!	#NULL!	#NULL!	#NULL!		#NULL!	#NULL!	#NULL!	#NULL!
2019-06-26 15:42:09	258	2019-06-26	"Better and better the further I am out from chemo"	1	#NULL!	#NULL!	#NULL!	#NULL!	#NULL!	#NULL!	#NULL!	#NULL!		0	#NULL!	#NULL!	#NULL!	#NULL!	#NULL!	#NULL!	#NULL!	#NULL!	#NULL!	#NULL!	#NULL!	#NULL!	#NULL!	#NULL!	#NULL!	#NULL!	#NULL!	#NULL!	#NULL!	#NULL!	#NULL!	#NULL!	#NULL!	#NULL!	1	0	#NULL!	#NULL!	#NULL!	#NULL!		#NULL!	#NULL!	#NULL!	#NULL!
2018-11-20 12:46:38	259	2018-11-20	fine	1	#NULL!	#NULL!	#NULL!	#NULL!	#NULL!	#NULL!	#NULL!	#NULL!		#NULL!	#NULL!	#NULL!	#NULL!	#NULL!	#NULL!	#NULL!	#NULL!	#NULL!	#NULL!	#NULL!	#NULL!	#NULL!	#NULL!	#NULL!	#NULL!	#NULL!	#NULL!	#NULL!	#NULL!	#NULL!	#NULL!	#NULL!	#NULL!	#NULL!	1	0	#NULL!	#NULL!	#NULL!	#NULL!		#NULL!	#NULL!	#NULL!	#NULL!
2018-11-26 12:23:05	259	2018-11-26	Normal - Great	1	#NULL!	#NULL!	#NULL!	#NULL!	#NULL!	#NULL!	#NULL!	#NULL!		#NULL!	#NULL!	#NULL!	#NULL!	#NULL!	#NULL!	#NULL!	#NULL!	#NULL!	#NULL!	#NULL!	#NULL!	#NULL!	#NULL!	#NULL!	#NULL!	#NULL!	#NULL!	#NULL!	#NULL!	#NULL!	#NULL!	#NULL!	#NULL!	#NULL!	1	0	#NULL!	#NULL!	#NULL!	#NULL!		#NULL!	#NULL!	#NULL!	#NULL!
2018-12-11 12:40:07	259	2018-12-11	Great!	1	#NULL!	#NULL!	#NULL!	#NULL!	#NULL!	#NULL!	#NULL!	#NULL!		#NULL!	#NULL!	#NULL!	#NULL!	#NULL!	#NULL!	#NULL!	#NULL!	#NULL!	#NULL!	#NULL!	#NULL!	#NULL!	#NULL!	#NULL!	#NULL!	#NULL!	#NULL!	#NULL!	#NULL!	#NULL!	#NULL!	#NULL!	#NULL!	#NULL!	1	1	#NULL!	#NULL!	#NULL!	#NULL!		1	1	1	1
2018-12-18 03:07:46	259	#NULL!	Great	1	#NULL!	#NULL!	#NULL!	#NULL!	#NULL!	#NULL!	#NULL!	#NULL!		#NULL!	#NULL!	#NULL!	#NULL!	#NULL!	#NULL!	#NULL!	#NULL!	#NULL!	#NULL!	#NULL!	#NULL!	#NULL!	#NULL!	#NULL!	#NULL!	#NULL!	#NULL!	#NULL!	#NULL!	#NULL!	#NULL!	#NULL!	#NULL!	#NULL!	1	1	#NULL!	#NULL!	#NULL!	#NULL!		1	1	1	1
2019-01-14 16:17:44	259	2019-01-14	Good except bad head cold this week starting as a virus.	1	#NULL!	#NULL!	#NULL!	#NULL!	#NULL!	#NULL!	#NULL!	#NULL!		#NULL!	#NULL!	#NULL!	#NULL!	#NULL!	#NULL!	#NULL!	#NULL!	#NULL!	#NULL!	#NULL!	#NULL!	#NULL!	#NULL!	#NULL!	#NULL!	#NULL!	#NULL!	#NULL!	#NULL!	#NULL!	#NULL!	#NULL!	#NULL!	#NULL!	1	0	#NULL!	#NULL!	#NULL!	#NULL!		#NULL!	#NULL!	#NULL!	#NULL!
2019-01-14 16:20:02	259	#NULL!	Good	1	#NULL!	#NULL!	#NULL!	#NULL!	#NULL!	#NULL!	#NULL!	#NULL!		#NULL!	#NULL!	#NULL!	#NULL!	#NULL!	#NULL!	#NULL!	#NULL!	#NULL!	#NULL!	#NULL!	#NULL!	#NULL!	#NULL!	#NULL!	#NULL!	#NULL!	#NULL!	#NULL!	#NULL!	#NULL!	#NULL!	#NULL!	#NULL!	#NULL!	1	0	#NULL!	#NULL!	#NULL!	#NULL!		#NULL!	#NULL!	#NULL!	#NULL!
2019-01-24 07:07:04	259	2019-01-24	Geeat	1	#NULL!	#NULL!	#NULL!	#NULL!	#NULL!	#NULL!	#NULL!	#NULL!		#NULL!	#NULL!	#NULL!	#NULL!	#NULL!	#NULL!	#NULL!	#NULL!	#NULL!	#NULL!	#NULL!	#NULL!	#NULL!	#NULL!	#NULL!	#NULL!	#NULL!	#NULL!	#NULL!	#NULL!	#NULL!	#NULL!	#NULL!	#NULL!	#NULL!	1	0	#NULL!	#NULL!	#NULL!	#NULL!		#NULL!	#NULL!	#NULL!	#NULL!
2019-03-01 07:11:07	259	2019-03-01	Great	1	#NULL!	#NULL!	#NULL!	#NULL!	#NULL!	#NULL!	#NULL!	#NULL!		0	#NULL!	#NULL!	#NULL!	#NULL!	#NULL!	#NULL!	#NULL!	#NULL!	#NULL!	#NULL!	#NULL!	#NULL!	#NULL!	#NULL!	#NULL!	#NULL!	#NULL!	#NULL!	#NULL!	#NULL!	#NULL!	#NULL!	#NULL!	#NULL!	1	0	#NULL!	#NULL!	#NULL!	#NULL!		#NULL!	#NULL!	#NULL!	#NULL!
2019-03-14 05:01:52	259	2019-03-14	Great	1	#NULL!	#NULL!	#NULL!	#NULL!	#NULL!	#NULL!	#NULL!	#NULL!		0	#NULL!	#NULL!	#NULL!	#NULL!	#NULL!	#NULL!	#NULL!	#NULL!	#NULL!	#NULL!	#NULL!	#NULL!	#NULL!	#NULL!	#NULL!	#NULL!	#NULL!	#NULL!	#NULL!	#NULL!	#NULL!	#NULL!	#NULL!	#NULL!	1	0	#NULL!	#NULL!	#NULL!	#NULL!		#NULL!	#NULL!	#NULL!	#NULL!
2018-12-14 12:59:24	260	2018-12-14	good	1	#NULL!	#NULL!	#NULL!	#NULL!	#NULL!	#NULL!	#NULL!	#NULL!		#NULL!	#NULL!	#NULL!	#NULL!	#NULL!	#NULL!	#NULL!	#NULL!	#NULL!	#NULL!	#NULL!	#NULL!	#NULL!	#NULL!	#NULL!	#NULL!	#NULL!	#NULL!	#NULL!	#NULL!	#NULL!	#NULL!	#NULL!	#NULL!	#NULL!	1	0	#NULL!	#NULL!	#NULL!	#NULL!		#NULL!	#NULL!	#NULL!	#NULL!
2018-12-19 12:15:31	260	2018-12-19	feel good	1	#NULL!	#NULL!	#NULL!	#NULL!	#NULL!	#NULL!	#NULL!	#NULL!		#NULL!	#NULL!	#NULL!	#NULL!	#NULL!	#NULL!	#NULL!	#NULL!	#NULL!	#NULL!	#NULL!	#NULL!	#NULL!	#NULL!	#NULL!	#NULL!	#NULL!	#NULL!	#NULL!	#NULL!	#NULL!	#NULL!	#NULL!	#NULL!	#NULL!	1	0	#NULL!	#NULL!	#NULL!	#NULL!		#NULL!	#NULL!	#NULL!	#NULL!
2019-01-25 10:19:11	260	2019-01-25	feel good	1	#NULL!	#NULL!	#NULL!	#NULL!	#NULL!	#NULL!	#NULL!	#NULL!		#NULL!	#NULL!	#NULL!	#NULL!	#NULL!	#NULL!	#NULL!	#NULL!	#NULL!	#NULL!	#NULL!	#NULL!	#NULL!	#NULL!	#NULL!	#NULL!	#NULL!	#NULL!	#NULL!	#NULL!	#NULL!	#NULL!	#NULL!	#NULL!	#NULL!	1	0	#NULL!	#NULL!	#NULL!	#NULL!		#NULL!	#NULL!	#NULL!	#NULL!
2019-03-01 11:05:37	260	2019-03-01	feel good	1	#NULL!	#NULL!	#NULL!	#NULL!	#NULL!	#NULL!	#NULL!	#NULL!		0	#NULL!	#NULL!	#NULL!	#NULL!	#NULL!	#NULL!	#NULL!	#NULL!	#NULL!	#NULL!	#NULL!	#NULL!	#NULL!	#NULL!	#NULL!	#NULL!	#NULL!	#NULL!	#NULL!	#NULL!	#NULL!	#NULL!	#NULL!	#NULL!	1	0	#NULL!	#NULL!	#NULL!	#NULL!		#NULL!	#NULL!	#NULL!	#NULL!
2018-12-12 12:11:43	261	2018-12-12	good now, last Thursday infection at drain site	1	#NULL!	#NULL!	#NULL!	#NULL!	#NULL!	#NULL!	#NULL!	#NULL!		#NULL!	#NULL!	#NULL!	#NULL!	#NULL!	#NULL!	#NULL!	#NULL!	#NULL!	#NULL!	#NULL!	#NULL!	#NULL!	#NULL!	#NULL!	#NULL!	#NULL!	#NULL!	#NULL!	#NULL!	#NULL!	#NULL!	#NULL!	#NULL!	#NULL!	2	7	#NULL!	#NULL!	#NULL!	#NULL!		5	5	5	5
2018-12-19 12:43:36	261	2018-12-19	good	1	#NULL!	#NULL!	#NULL!	#NULL!	#NULL!	#NULL!	#NULL!	#NULL!		#NULL!	#NULL!	#NULL!	#NULL!	#NULL!	#NULL!	#NULL!	#NULL!	#NULL!	#NULL!	#NULL!	#NULL!	#NULL!	#NULL!	#NULL!	#NULL!	#NULL!	#NULL!	#NULL!	#NULL!	#NULL!	#NULL!	#NULL!	#NULL!	#NULL!	1	3	#NULL!	#NULL!	#NULL!	#NULL!		1	1	1	1
2018-12-12 12:21:34	262	2018-12-12	GOOD	1	#NULL!	#NULL!	#NULL!	#NULL!	#NULL!	#NULL!	#NULL!	#NULL!		#NULL!	#NULL!	#NULL!	#NULL!	#NULL!	#NULL!	#NULL!	#NULL!	#NULL!	#NULL!	#NULL!	#NULL!	#NULL!	#NULL!	#NULL!	#NULL!	#NULL!	#NULL!	#NULL!	#NULL!	#NULL!	#NULL!	#NULL!	#NULL!	#NULL!	1	1	#NULL!	#NULL!	#NULL!	#NULL!		1	1	1	1
2019-01-16 11:06:26	263	2019-01-16	crazy	1	#NULL!	#NULL!	#NULL!	#NULL!	#NULL!	#NULL!	#NULL!	#NULL!		#NULL!	#NULL!	#NULL!	#NULL!	#NULL!	#NULL!	#NULL!	#NULL!	#NULL!	#NULL!	#NULL!	#NULL!	#NULL!	#NULL!	#NULL!	#NULL!	#NULL!	#NULL!	#NULL!	#NULL!	#NULL!	#NULL!	#NULL!	#NULL!	#NULL!	1	0	#NULL!	#NULL!	#NULL!	#NULL!		#NULL!	#NULL!	#NULL!	#NULL!
2019-03-20 12:01:38	263	2019-03-20	WELL. SLUGGISH.	1	#NULL!	#NULL!	#NULL!	#NULL!	#NULL!	#NULL!	#NULL!	#NULL!		0	#NULL!	#NULL!	#NULL!	#NULL!	#NULL!	#NULL!	#NULL!	#NULL!	#NULL!	#NULL!	#NULL!	#NULL!	#NULL!	#NULL!	#NULL!	#NULL!	#NULL!	#NULL!	#NULL!	#NULL!	#NULL!	#NULL!	#NULL!	#NULL!	1	1	#NULL!	#NULL!	#NULL!	#NULL!		1	1	1	1
2019-03-28 16:12:50	263	2019-03-28	"much better--I had a partial nephrectomy on Monday"	1	#NULL!	#NULL!	#NULL!	#NULL!	#NULL!	#NULL!	#NULL!	#NULL!		0	#NULL!	#NULL!	#NULL!	#NULL!	#NULL!	#NULL!	#NULL!	#NULL!	#NULL!	#NULL!	#NULL!	#NULL!	#NULL!	#NULL!	#NULL!	#NULL!	#NULL!	#NULL!	#NULL!	#NULL!	#NULL!	#NULL!	#NULL!	#NULL!	1	4	#NULL!	#NULL!	#NULL!	#NULL!		4	4	4	4
2019-04-15 11:53:43	263	2019-04-15	pretty good	1	#NULL!	#NULL!	#NULL!	#NULL!	#NULL!	#NULL!	#NULL!	#NULL!		0	#NULL!	#NULL!	#NULL!	#NULL!	#NULL!	#NULL!	#NULL!	#NULL!	#NULL!	#NULL!	#NULL!	#NULL!	#NULL!	#NULL!	#NULL!	#NULL!	#NULL!	#NULL!	#NULL!	#NULL!	#NULL!	#NULL!	#NULL!	#NULL!	1	1	#NULL!	#NULL!	#NULL!	#NULL!		1	1	1	1
2019-04-22 17:55:23	263	2019-04-22	pretty good	1	#NULL!	#NULL!	#NULL!	#NULL!	#NULL!	#NULL!	#NULL!	#NULL!		0	#NULL!	#NULL!	#NULL!	#NULL!	#NULL!	#NULL!	#NULL!	#NULL!	#NULL!	#NULL!	#NULL!	#NULL!	#NULL!	#NULL!	#NULL!	#NULL!	#NULL!	#NULL!	#NULL!	#NULL!	#NULL!	#NULL!	#NULL!	#NULL!	1	0	#NULL!	#NULL!	#NULL!	#NULL!		#NULL!	#NULL!	#NULL!	#NULL!
2019-05-14 12:55:23	263	2019-05-13	DOING WELL	1	#NULL!	#NULL!	#NULL!	#NULL!	#NULL!	#NULL!	#NULL!	#NULL!		0	#NULL!	#NULL!	#NULL!	#NULL!	#NULL!	#NULL!	#NULL!	#NULL!	#NULL!	#NULL!	#NULL!	#NULL!	#NULL!	#NULL!	#NULL!	#NULL!	#NULL!	#NULL!	#NULL!	#NULL!	#NULL!	#NULL!	#NULL!	#NULL!	1	0	#NULL!	#NULL!	#NULL!	#NULL!		#NULL!	#NULL!	#NULL!	#NULL!
2019-05-22 12:08:01	263	2019-05-22	Doing Pretty well saw Dr. last week only spot under arm is sore lymph node	1	#NULL!	#NULL!	#NULL!	#NULL!	#NULL!	#NULL!	#NULL!	#NULL!		0	#NULL!	#NULL!	#NULL!	#NULL!	#NULL!	#NULL!	#NULL!	#NULL!	#NULL!	#NULL!	#NULL!	#NULL!	#NULL!	#NULL!	#NULL!	#NULL!	#NULL!	#NULL!	#NULL!	#NULL!	#NULL!	#NULL!	#NULL!	#NULL!	1	1	#NULL!	#NULL!	#NULL!	#NULL!		1	1	1	1
2019-06-19 14:47:50	263	2019-06-19	pretty well	#NULL!	#NULL!	#NULL!	1	#NULL!	#NULL!	#NULL!	#NULL!	#NULL!		0	#NULL!	#NULL!	#NULL!	#NULL!	#NULL!	#NULL!	#NULL!	#NULL!	#NULL!	#NULL!	#NULL!	#NULL!	#NULL!	#NULL!	#NULL!	#NULL!	#NULL!	#NULL!	#NULL!	#NULL!	#NULL!	#NULL!	#NULL!	#NULL!	1	0	#NULL!	#NULL!	#NULL!	#NULL!		#NULL!	#NULL!	#NULL!	#NULL!
2018-12-19 13:18:13	265	2018-12-19	fine	1	#NULL!	#NULL!	#NULL!	#NULL!	#NULL!	#NULL!	#NULL!	#NULL!		#NULL!	#NULL!	#NULL!	#NULL!	#NULL!	#NULL!	#NULL!	#NULL!	#NULL!	#NULL!	#NULL!	#NULL!	#NULL!	#NULL!	#NULL!	#NULL!	#NULL!	#NULL!	#NULL!	#NULL!	#NULL!	#NULL!	#NULL!	#NULL!	#NULL!	1	3	#NULL!	#NULL!	#NULL!	#NULL!		1	1	1	1
2019-02-26 15:05:20	265	2019-02-26	OK--breast soreness	1	#NULL!	#NULL!	#NULL!	#NULL!	#NULL!	#NULL!	#NULL!	#NULL!		0	#NULL!	#NULL!	#NULL!	#NULL!	#NULL!	#NULL!	#NULL!	#NULL!	#NULL!	#NULL!	#NULL!	#NULL!	#NULL!	#NULL!	#NULL!	#NULL!	#NULL!	#NULL!	#NULL!	#NULL!	#NULL!	#NULL!	#NULL!	#NULL!	1	3	#NULL!	#NULL!	#NULL!	#NULL!		1	1	1	1
2019-03-18 14:20:13	265	2019-03-18	FINE	#NULL!	#NULL!	#NULL!	#NULL!	#NULL!	#NULL!	#NULL!	#NULL!	1	ZOLOTA ORAL CHEMO	0	#NULL!	#NULL!	#NULL!	#NULL!	#NULL!	#NULL!	#NULL!	#NULL!	#NULL!	#NULL!	#NULL!	#NULL!	#NULL!	#NULL!	#NULL!	#NULL!	#NULL!	#NULL!	#NULL!	#NULL!	#NULL!	#NULL!	#NULL!	#NULL!	1	0	#NULL!	#NULL!	#NULL!	#NULL!		#NULL!	#NULL!	#NULL!	#NULL!
2019-03-25 13:46:53	265	2019-03-25	Well.	#NULL!	#NULL!	#NULL!	#NULL!	#NULL!	#NULL!	#NULL!	#NULL!	1	cappecitabine	0	#NULL!	#NULL!	#NULL!	#NULL!	#NULL!	#NULL!	#NULL!	#NULL!	#NULL!	#NULL!	#NULL!	#NULL!	#NULL!	#NULL!	#NULL!	#NULL!	#NULL!	#NULL!	#NULL!	#NULL!	#NULL!	#NULL!	#NULL!	#NULL!	1	0	#NULL!	#NULL!	#NULL!	#NULL!		#NULL!	#NULL!	#NULL!	#NULL!
2019-04-17 11:08:21	265	2019-04-17	fine	#NULL!	#NULL!	1	#NULL!	#NULL!	#NULL!	#NULL!	#NULL!	1	oral chemo capecitabine	0	#NULL!	#NULL!	#NULL!	#NULL!	#NULL!	#NULL!	#NULL!	#NULL!	#NULL!	#NULL!	#NULL!	#NULL!	#NULL!	#NULL!	#NULL!	#NULL!	#NULL!	#NULL!	#NULL!	#NULL!	#NULL!	#NULL!	#NULL!	#NULL!	1	0	#NULL!	#NULL!	#NULL!	#NULL!		#NULL!	#NULL!	#NULL!	#NULL!
2019-05-22 13:30:02	265	2019-05-22	Good--a little sore from exercise	#NULL!	#NULL!	1	#NULL!	#NULL!	#NULL!	#NULL!	#NULL!	#NULL!		0	#NULL!	#NULL!	#NULL!	#NULL!	#NULL!	#NULL!	#NULL!	#NULL!	#NULL!	#NULL!	#NULL!	#NULL!	#NULL!	#NULL!	#NULL!	#NULL!	#NULL!	#NULL!	#NULL!	#NULL!	#NULL!	#NULL!	#NULL!	#NULL!	1	0	#NULL!	#NULL!	#NULL!	#NULL!		#NULL!	#NULL!	#NULL!	#NULL!
2018-12-19 13:25:56	266	2018-12-19	pretty good	1	#NULL!	#NULL!	#NULL!	#NULL!	#NULL!	#NULL!	#NULL!	#NULL!		#NULL!	#NULL!	#NULL!	#NULL!	#NULL!	#NULL!	#NULL!	#NULL!	#NULL!	#NULL!	#NULL!	#NULL!	#NULL!	#NULL!	#NULL!	#NULL!	#NULL!	#NULL!	#NULL!	#NULL!	#NULL!	#NULL!	#NULL!	#NULL!	#NULL!	1	4	#NULL!	#NULL!	#NULL!	#NULL!		3	3	1	3
2019-01-16 13:34:51	266	2019-01-16	pretty good	1	#NULL!	#NULL!	#NULL!	#NULL!	#NULL!	#NULL!	#NULL!	#NULL!		#NULL!	#NULL!	#NULL!	#NULL!	#NULL!	#NULL!	#NULL!	#NULL!	#NULL!	#NULL!	#NULL!	#NULL!	#NULL!	#NULL!	#NULL!	#NULL!	#NULL!	#NULL!	#NULL!	#NULL!	#NULL!	#NULL!	#NULL!	#NULL!	#NULL!	1	2	#NULL!	#NULL!	#NULL!	#NULL!		1	1	1	1
2019-01-25 10:41:41	266	2019-01-25	pretty good	1	#NULL!	#NULL!	#NULL!	#NULL!	#NULL!	#NULL!	#NULL!	#NULL!		#NULL!	#NULL!	#NULL!	#NULL!	#NULL!	#NULL!	#NULL!	#NULL!	#NULL!	#NULL!	#NULL!	#NULL!	#NULL!	#NULL!	#NULL!	#NULL!	#NULL!	#NULL!	#NULL!	#NULL!	#NULL!	#NULL!	#NULL!	#NULL!	#NULL!	1	2	#NULL!	#NULL!	#NULL!	#NULL!		1	1	1	1
2019-02-01 11:55:02	266	2019-02-01	pretty good	1	#NULL!	#NULL!	#NULL!	#NULL!	#NULL!	#NULL!	#NULL!	#NULL!		#NULL!	#NULL!	#NULL!	#NULL!	#NULL!	#NULL!	#NULL!	#NULL!	#NULL!	#NULL!	#NULL!	#NULL!	#NULL!	#NULL!	#NULL!	#NULL!	#NULL!	#NULL!	#NULL!	#NULL!	#NULL!	#NULL!	#NULL!	#NULL!	#NULL!	1	2	#NULL!	#NULL!	#NULL!	#NULL!		1	1	1	1
2019-03-01 12:30:52	266	2019-03-01	"itchy, but better each week"	1	#NULL!	#NULL!	#NULL!	#NULL!	#NULL!	#NULL!	#NULL!	#NULL!		0	#NULL!	#NULL!	#NULL!	#NULL!	#NULL!	#NULL!	#NULL!	#NULL!	#NULL!	#NULL!	#NULL!	#NULL!	#NULL!	#NULL!	#NULL!	#NULL!	#NULL!	#NULL!	#NULL!	#NULL!	#NULL!	#NULL!	#NULL!	#NULL!	1	0	#NULL!	#NULL!	#NULL!	#NULL!		#NULL!	#NULL!	#NULL!	#NULL!
2019-01-07 17:37:46	267	2019-01-07	good	1	#NULL!	#NULL!	#NULL!	#NULL!	#NULL!	#NULL!	#NULL!	#NULL!		#NULL!	#NULL!	#NULL!	#NULL!	#NULL!	#NULL!	#NULL!	#NULL!	#NULL!	#NULL!	#NULL!	#NULL!	#NULL!	#NULL!	#NULL!	#NULL!	#NULL!	#NULL!	#NULL!	#NULL!	#NULL!	#NULL!	#NULL!	#NULL!	#NULL!	1	0	#NULL!	#NULL!	#NULL!	#NULL!		#NULL!	#NULL!	#NULL!	#NULL!
2019-01-14 10:05:10	267	2019-01-14	Good	1	#NULL!	#NULL!	#NULL!	#NULL!	#NULL!	#NULL!	#NULL!	#NULL!		#NULL!	#NULL!	#NULL!	#NULL!	#NULL!	#NULL!	#NULL!	#NULL!	#NULL!	#NULL!	#NULL!	#NULL!	#NULL!	#NULL!	#NULL!	#NULL!	#NULL!	#NULL!	#NULL!	#NULL!	#NULL!	#NULL!	#NULL!	#NULL!	#NULL!	1	0	#NULL!	#NULL!	#NULL!	#NULL!		#NULL!	#NULL!	#NULL!	#NULL!
2019-01-23 20:42:10	267	2019-01-21	Good	1	#NULL!	#NULL!	#NULL!	#NULL!	#NULL!	#NULL!	#NULL!	#NULL!		#NULL!	#NULL!	#NULL!	#NULL!	#NULL!	#NULL!	#NULL!	#NULL!	#NULL!	#NULL!	#NULL!	#NULL!	#NULL!	#NULL!	#NULL!	#NULL!	#NULL!	#NULL!	#NULL!	#NULL!	#NULL!	#NULL!	#NULL!	#NULL!	#NULL!	1	0	#NULL!	#NULL!	#NULL!	#NULL!		#NULL!	#NULL!	#NULL!	#NULL!
2019-01-25 09:07:19	267	2019-01-25	good	1	#NULL!	#NULL!	#NULL!	#NULL!	#NULL!	#NULL!	#NULL!	#NULL!		#NULL!	#NULL!	#NULL!	#NULL!	#NULL!	#NULL!	#NULL!	#NULL!	#NULL!	#NULL!	#NULL!	#NULL!	#NULL!	#NULL!	#NULL!	#NULL!	#NULL!	#NULL!	#NULL!	#NULL!	#NULL!	#NULL!	#NULL!	#NULL!	#NULL!	1	0	#NULL!	#NULL!	#NULL!	#NULL!		#NULL!	#NULL!	#NULL!	#NULL!
2019-01-30 16:45:28	267	2019-01-30	Good	1	#NULL!	#NULL!	#NULL!	#NULL!	#NULL!	#NULL!	#NULL!	#NULL!		#NULL!	#NULL!	#NULL!	#NULL!	#NULL!	#NULL!	#NULL!	#NULL!	#NULL!	#NULL!	#NULL!	#NULL!	#NULL!	#NULL!	#NULL!	#NULL!	#NULL!	#NULL!	#NULL!	#NULL!	#NULL!	#NULL!	#NULL!	#NULL!	#NULL!	1	0	#NULL!	#NULL!	#NULL!	#NULL!		#NULL!	#NULL!	#NULL!	#NULL!
2019-02-12 18:08:06	267	2019-02-12	ok	#NULL!	#NULL!	1	#NULL!	#NULL!	#NULL!	#NULL!	#NULL!	#NULL!		1	1	1	1	1	1	1	2	1	1	1	1	1	2	1	2	2	3	4	2	1	1	1	1	1	1	0	#NULL!	#NULL!	#NULL!	#NULL!		#NULL!	#NULL!	#NULL!	#NULL!
2019-02-19 20:03:45	267	2019-02-19	Ok	#NULL!	#NULL!	1	#NULL!	#NULL!	#NULL!	#NULL!	#NULL!	#NULL!		0	#NULL!	#NULL!	#NULL!	#NULL!	#NULL!	#NULL!	#NULL!	#NULL!	#NULL!	#NULL!	#NULL!	#NULL!	#NULL!	#NULL!	#NULL!	#NULL!	#NULL!	#NULL!	#NULL!	#NULL!	#NULL!	#NULL!	#NULL!	#NULL!	1	0	#NULL!	#NULL!	#NULL!	#NULL!		#NULL!	#NULL!	#NULL!	#NULL!
2019-02-27 10:28:28	267	2019-02-27	Ok	#NULL!	#NULL!	#NULL!	#NULL!	#NULL!	#NULL!	1	#NULL!	1	Kadczila	0	#NULL!	#NULL!	#NULL!	#NULL!	#NULL!	#NULL!	#NULL!	#NULL!	#NULL!	#NULL!	#NULL!	#NULL!	#NULL!	#NULL!	#NULL!	#NULL!	#NULL!	#NULL!	#NULL!	#NULL!	#NULL!	#NULL!	#NULL!	#NULL!	1	0	#NULL!	#NULL!	#NULL!	#NULL!		#NULL!	#NULL!	#NULL!	#NULL!
2019-03-11 17:22:26	267	2019-03-11	pretty good	#NULL!	#NULL!	1	#NULL!	#NULL!	#NULL!	#NULL!	#NULL!	#NULL!		0	#NULL!	#NULL!	#NULL!	#NULL!	#NULL!	#NULL!	#NULL!	#NULL!	#NULL!	#NULL!	#NULL!	#NULL!	#NULL!	#NULL!	#NULL!	#NULL!	#NULL!	#NULL!	#NULL!	#NULL!	#NULL!	#NULL!	#NULL!	#NULL!	1	0	#NULL!	#NULL!	#NULL!	#NULL!		#NULL!	#NULL!	#NULL!	#NULL!
2019-03-23 16:46:45	267	2019-03-18	Ok	#NULL!	#NULL!	1	#NULL!	#NULL!	#NULL!	#NULL!	#NULL!	#NULL!		0	#NULL!	#NULL!	#NULL!	#NULL!	#NULL!	#NULL!	#NULL!	#NULL!	#NULL!	#NULL!	#NULL!	#NULL!	#NULL!	#NULL!	#NULL!	#NULL!	#NULL!	#NULL!	#NULL!	#NULL!	#NULL!	#NULL!	#NULL!	#NULL!	1	1	#NULL!	#NULL!	#NULL!	#NULL!		2	2	2	2
2019-03-25 17:37:56	267	2019-03-25	ok	#NULL!	#NULL!	1	#NULL!	#NULL!	#NULL!	#NULL!	#NULL!	#NULL!		0	#NULL!	#NULL!	#NULL!	#NULL!	#NULL!	#NULL!	#NULL!	#NULL!	#NULL!	#NULL!	#NULL!	#NULL!	#NULL!	#NULL!	#NULL!	#NULL!	#NULL!	#NULL!	#NULL!	#NULL!	#NULL!	#NULL!	#NULL!	#NULL!	1	0	#NULL!	#NULL!	#NULL!	#NULL!		#NULL!	#NULL!	#NULL!	#NULL!
2019-05-16 12:59:09	267	2019-05-16	good	#NULL!	#NULL!	1	#NULL!	#NULL!	#NULL!	1	#NULL!	#NULL!		0	#NULL!	#NULL!	#NULL!	#NULL!	#NULL!	#NULL!	#NULL!	#NULL!	#NULL!	#NULL!	#NULL!	#NULL!	#NULL!	#NULL!	#NULL!	#NULL!	#NULL!	#NULL!	#NULL!	#NULL!	#NULL!	#NULL!	#NULL!	#NULL!	1	0	#NULL!	#NULL!	#NULL!	#NULL!		#NULL!	#NULL!	#NULL!	#NULL!
2019-06-20 14:54:32	267	2019-06-20	Good	#NULL!	#NULL!	1	#NULL!	#NULL!	#NULL!	1	#NULL!	#NULL!		0	#NULL!	#NULL!	#NULL!	#NULL!	#NULL!	#NULL!	#NULL!	#NULL!	#NULL!	#NULL!	#NULL!	#NULL!	#NULL!	#NULL!	#NULL!	#NULL!	#NULL!	#NULL!	#NULL!	#NULL!	#NULL!	#NULL!	#NULL!	#NULL!	1	0	#NULL!	#NULL!	#NULL!	#NULL!		#NULL!	#NULL!	#NULL!	#NULL!
2019-06-27 10:15:23	267	2019-06-25	Good	#NULL!	#NULL!	1	#NULL!	#NULL!	#NULL!	1	#NULL!	#NULL!		0	#NULL!	#NULL!	#NULL!	#NULL!	#NULL!	#NULL!	#NULL!	#NULL!	#NULL!	#NULL!	#NULL!	#NULL!	#NULL!	#NULL!	#NULL!	#NULL!	#NULL!	#NULL!	#NULL!	#NULL!	#NULL!	#NULL!	#NULL!	#NULL!	1	0	#NULL!	#NULL!	#NULL!	#NULL!		#NULL!	#NULL!	#NULL!	#NULL!
2019-07-18 18:12:35	267	2019-07-18	good	#NULL!	#NULL!	1	#NULL!	#NULL!	#NULL!	1	#NULL!	#NULL!		0	#NULL!	#NULL!	#NULL!	#NULL!	#NULL!	#NULL!	#NULL!	#NULL!	#NULL!	#NULL!	#NULL!	#NULL!	#NULL!	#NULL!	#NULL!	#NULL!	#NULL!	#NULL!	#NULL!	#NULL!	#NULL!	#NULL!	#NULL!	#NULL!	1	0	#NULL!	#NULL!	#NULL!	#NULL!		#NULL!	#NULL!	#NULL!	#NULL!
2019-08-12 17:40:46	267	2019-08-12	good	#NULL!	#NULL!	1	#NULL!	#NULL!	#NULL!	1	#NULL!	#NULL!		0	#NULL!	#NULL!	#NULL!	#NULL!	#NULL!	#NULL!	#NULL!	#NULL!	#NULL!	#NULL!	#NULL!	#NULL!	#NULL!	#NULL!	#NULL!	#NULL!	#NULL!	#NULL!	#NULL!	#NULL!	#NULL!	#NULL!	#NULL!	#NULL!	1	0	#NULL!	#NULL!	#NULL!	#NULL!		#NULL!	#NULL!	#NULL!	#NULL!
2019-08-28 12:50:22	267	2019-08-28	Good	1	#NULL!	#NULL!	#NULL!	#NULL!	#NULL!	#NULL!	#NULL!	#NULL!		0	#NULL!	#NULL!	#NULL!	#NULL!	#NULL!	#NULL!	#NULL!	#NULL!	#NULL!	#NULL!	#NULL!	#NULL!	#NULL!	#NULL!	#NULL!	#NULL!	#NULL!	#NULL!	#NULL!	#NULL!	#NULL!	#NULL!	#NULL!	#NULL!	1	0	#NULL!	#NULL!	#NULL!	#NULL!		#NULL!	#NULL!	#NULL!	#NULL!
2019-08-29 13:55:01	267	2019-08-29	good	1	#NULL!	#NULL!	#NULL!	#NULL!	#NULL!	#NULL!	#NULL!	#NULL!		0	#NULL!	#NULL!	#NULL!	#NULL!	#NULL!	#NULL!	#NULL!	#NULL!	#NULL!	#NULL!	#NULL!	#NULL!	#NULL!	#NULL!	#NULL!	#NULL!	#NULL!	#NULL!	#NULL!	#NULL!	#NULL!	#NULL!	#NULL!	#NULL!	1	0	#NULL!	#NULL!	#NULL!	#NULL!		#NULL!	#NULL!	#NULL!	#NULL!
2019-09-30 14:48:20	267	2019-09-30	good	1	#NULL!	#NULL!	#NULL!	#NULL!	#NULL!	#NULL!	#NULL!	#NULL!		0	#NULL!	#NULL!	#NULL!	#NULL!	#NULL!	#NULL!	#NULL!	#NULL!	#NULL!	#NULL!	#NULL!	#NULL!	#NULL!	#NULL!	#NULL!	#NULL!	#NULL!	#NULL!	#NULL!	#NULL!	#NULL!	#NULL!	#NULL!	#NULL!	1	0	#NULL!	#NULL!	#NULL!	#NULL!		#NULL!	#NULL!	#NULL!	#NULL!
2019-10-14 15:36:49	267	2019-10-14	Good	1	#NULL!	#NULL!	#NULL!	#NULL!	#NULL!	#NULL!	#NULL!	#NULL!		0	#NULL!	#NULL!	#NULL!	#NULL!	#NULL!	#NULL!	#NULL!	#NULL!	#NULL!	#NULL!	#NULL!	#NULL!	#NULL!	#NULL!	#NULL!	#NULL!	#NULL!	#NULL!	#NULL!	#NULL!	#NULL!	#NULL!	#NULL!	#NULL!	1	0	#NULL!	#NULL!	#NULL!	#NULL!		#NULL!	#NULL!	#NULL!	#NULL!
2019-11-05 13:30:44	267	2019-11-05	Good	1	#NULL!	#NULL!	#NULL!	#NULL!	#NULL!	#NULL!	#NULL!	#NULL!		0	#NULL!	#NULL!	#NULL!	#NULL!	#NULL!	#NULL!	#NULL!	#NULL!	#NULL!	#NULL!	#NULL!	#NULL!	#NULL!	#NULL!	#NULL!	#NULL!	#NULL!	#NULL!	#NULL!	#NULL!	#NULL!	#NULL!	#NULL!	#NULL!	1	1	#NULL!	#NULL!	#NULL!	#NULL!		2	1	1	1
2019-11-21 19:23:30	267	2019-11-21	Good	1	#NULL!	#NULL!	#NULL!	#NULL!	#NULL!	#NULL!	#NULL!	#NULL!		0	#NULL!	#NULL!	#NULL!	#NULL!	#NULL!	#NULL!	#NULL!	#NULL!	#NULL!	#NULL!	#NULL!	#NULL!	#NULL!	#NULL!	#NULL!	#NULL!	#NULL!	#NULL!	#NULL!	#NULL!	#NULL!	#NULL!	#NULL!	#NULL!	1	0	#NULL!	#NULL!	#NULL!	#NULL!		#NULL!	#NULL!	#NULL!	#NULL!
2019-02-13 15:45:58	269	2019-02-13	tired.doing okay	1	#NULL!	#NULL!	#NULL!	#NULL!	#NULL!	#NULL!	#NULL!	#NULL!		#NULL!	#NULL!	#NULL!	#NULL!	#NULL!	#NULL!	#NULL!	#NULL!	#NULL!	#NULL!	#NULL!	#NULL!	#NULL!	#NULL!	#NULL!	#NULL!	#NULL!	#NULL!	#NULL!	#NULL!	#NULL!	#NULL!	#NULL!	#NULL!	#NULL!	1	2	#NULL!	#NULL!	#NULL!	#NULL!		2	3	3	2
2019-03-18 14:30:10	269	2019-03-18	tired just left dialysis	1	#NULL!	#NULL!	#NULL!	#NULL!	#NULL!	#NULL!	#NULL!	#NULL!		0	#NULL!	#NULL!	#NULL!	#NULL!	#NULL!	#NULL!	#NULL!	#NULL!	#NULL!	#NULL!	#NULL!	#NULL!	#NULL!	#NULL!	#NULL!	#NULL!	#NULL!	#NULL!	#NULL!	#NULL!	#NULL!	#NULL!	#NULL!	#NULL!	1	2	#NULL!	#NULL!	#NULL!	#NULL!		1	1	1	1
2019-01-15 22:40:01	270	2019-01-15	I have been feeling well. I have fair to good energy. No nausea. Moderately anxious mood regarding upcoming axillary node dissection on January 22.	1	#NULL!	#NULL!	#NULL!	#NULL!	#NULL!	#NULL!	#NULL!	#NULL!		#NULL!	#NULL!	#NULL!	#NULL!	#NULL!	#NULL!	#NULL!	#NULL!	#NULL!	#NULL!	#NULL!	#NULL!	#NULL!	#NULL!	#NULL!	#NULL!	#NULL!	#NULL!	#NULL!	#NULL!	#NULL!	#NULL!	#NULL!	#NULL!	#NULL!	1	5	#NULL!	#NULL!	#NULL!	#NULL!		2	2	2	3
2019-03-25 13:02:27	270	2019-05-25		#NULL!	#NULL!	#NULL!	#NULL!	#NULL!	#NULL!	#NULL!	#NULL!	#NULL!		#NULL!	#NULL!	#NULL!	#NULL!	#NULL!	#NULL!	#NULL!	#NULL!	#NULL!	#NULL!	#NULL!	#NULL!	#NULL!	#NULL!	#NULL!	#NULL!	#NULL!	#NULL!	#NULL!	#NULL!	#NULL!	#NULL!	#NULL!	#NULL!	#NULL!	#NULL!	#NULL!	#NULL!	#NULL!	#NULL!	#NULL!		#NULL!	#NULL!	#NULL!	#NULL!
2019-04-22 18:47:44	270	2019-04-22	Great	1	#NULL!	#NULL!	#NULL!	#NULL!	#NULL!	#NULL!	#NULL!	1	Zolodex	1	1	1	1	1	2	2	2	1	1	1	1	1	2	1	1	1	4	4	1	2	2	2	2	3	1	3	#NULL!	#NULL!	#NULL!	#NULL!		2	2	2	2
2019-05-14 23:10:56	270	2019-05-14	Achey left hip. Moderately well.	#NULL!	#NULL!	#NULL!	1	#NULL!	#NULL!	#NULL!	#NULL!	1	Zolodex	1	3	3	1	2	2	2	2	3	1	1	1	1	3	2	3	2	4	4	2	2	3	2	2	3	1	6	#NULL!	#NULL!	#NULL!	#NULL!		2	2	2	3
2019-01-16 14:08:29	271	2019-01-16	not too bad	1	#NULL!	#NULL!	#NULL!	#NULL!	#NULL!	#NULL!	#NULL!	#NULL!		#NULL!	#NULL!	#NULL!	#NULL!	#NULL!	#NULL!	#NULL!	#NULL!	#NULL!	#NULL!	#NULL!	#NULL!	#NULL!	#NULL!	#NULL!	#NULL!	#NULL!	#NULL!	#NULL!	#NULL!	#NULL!	#NULL!	#NULL!	#NULL!	#NULL!	1	5	#NULL!	#NULL!	#NULL!	#NULL!		1	1	1	1
2019-01-25 15:02:49	271	2019-01-25	pretty good, except for keloid forming on edge of incision	1	#NULL!	#NULL!	#NULL!	#NULL!	#NULL!	#NULL!	#NULL!	#NULL!		#NULL!	#NULL!	#NULL!	#NULL!	#NULL!	#NULL!	#NULL!	#NULL!	#NULL!	#NULL!	#NULL!	#NULL!	#NULL!	#NULL!	#NULL!	#NULL!	#NULL!	#NULL!	#NULL!	#NULL!	#NULL!	#NULL!	#NULL!	#NULL!	#NULL!	1	0	#NULL!	#NULL!	#NULL!	#NULL!		#NULL!	#NULL!	#NULL!	#NULL!
2019-03-28 16:26:32	271	2019-03-28	pretty good	#NULL!	#NULL!	#NULL!	1	#NULL!	#NULL!	#NULL!	#NULL!	#NULL!		0	#NULL!	#NULL!	#NULL!	#NULL!	#NULL!	#NULL!	#NULL!	#NULL!	#NULL!	#NULL!	#NULL!	#NULL!	#NULL!	#NULL!	#NULL!	#NULL!	#NULL!	#NULL!	#NULL!	#NULL!	#NULL!	#NULL!	#NULL!	#NULL!	1	0	#NULL!	#NULL!	#NULL!	#NULL!		#NULL!	#NULL!	#NULL!	#NULL!
2019-04-08 11:15:23	271	2019-03-22	More nausea after stopping radiation	1	#NULL!	#NULL!	#NULL!	#NULL!	#NULL!	#NULL!	#NULL!	#NULL!		1	3	4	4	3	3	3	3	3	2	3	3	3	5	5	5	5	3	3	2	1	4	4	4	4	1	4	#NULL!	#NULL!	#NULL!	#NULL!		3	3	3	3
2019-01-16 13:53:11	272	2019-01-16	good	#NULL!	#NULL!	#NULL!	1	#NULL!	#NULL!	#NULL!	#NULL!	#NULL!		#NULL!	#NULL!	#NULL!	#NULL!	#NULL!	#NULL!	#NULL!	#NULL!	#NULL!	#NULL!	#NULL!	#NULL!	#NULL!	#NULL!	#NULL!	#NULL!	#NULL!	#NULL!	#NULL!	#NULL!	#NULL!	#NULL!	#NULL!	#NULL!	#NULL!	1	0	#NULL!	#NULL!	#NULL!	#NULL!		#NULL!	#NULL!	#NULL!	#NULL!
[truncated: 955 more rows]
[truncated: 56 more columns]
